# Supplementary material for: Application across species of a one health approach to liquid sample handling for respiratory based -omics analysis
Source: Sci Rep. 2021 Jul 12;11:14292. doi: 10.1038/s41598-021-93839-9 (PMC8275668; doi:10.1038/s41598-021-93839-9)
Supplement: Supplementary file 2 — Supplementary Data 1. [file 41598_2021_93839_MOESM2_ESM.xlsx]

## Sheet: Band 1
Mascot Search Results
Search title : Uniprot_Horse_25ppm-05Da
MS data file : 56294995342143258.mgf
Database : Uniprot-Horse UP000002281-25-02-2019 (22705 sequences; 12757064 residues)
Timestamp : 5 Apr 2019 at 16:37:22 GMT
Enzyme : Trypsin
Variable modifications : Carbamidomethyl (C),Deamidated (NQ),Oxidation (M)
Mass values : Monoisotopic
Protein Mass : Unrestricted
Peptide Mass Tolerance : ± 25 ppm (# 13C = 1)
Fragment Mass Tolerance: ± 0.06 Da
Max Missed Cleavages : 1
Instrument type : ESI-QUAD-TOF
Number of queries : 1063
Protein hits :	F6RDD3	Globin A1 OS=Equus caballus OX=9796 GN=HBB PE=3 SV=1
	F6SJK9	Uncharacterized protein OS=Equus caballus OX=9796 PE=3 SV=1
	F7B7X0	Keratin 1 OS=Equus caballus OX=9796 GN=KRT1 PE=3 SV=1
	F6X1X3	Vitelline membrane outer layer 1 homolog OS=Equus caballus OX=9796 GN=VMO1 PE=4 SV=1
	F6SHJ8	Uncharacterized protein OS=Equus caballus OX=9796 PE=3 SV=1
	F6R1I4	Uteroglobin OS=Equus caballus OX=9796 GN=SCGB1A1 PE=4 SV=1
	F6QAU5	Uncharacterized protein OS=Equus caballus OX=9796 PE=4 SV=1
	F6S8W6	Keratin 75 OS=Equus caballus OX=9796 GN=KRT75 PE=3 SV=1
	F6T323	Uncharacterized protein OS=Equus caballus OX=9796 GN=LOC100055297 PE=3 SV=1
	F6UL68	Transthyretin OS=Equus caballus OX=9796 GN=TTR PE=3 SV=1
	F6YIA9	Uncharacterized protein OS=Equus caballus OX=9796 GN=KRT17 PE=3 SV=1
	F6ZWS7	Uncharacterized protein OS=Equus caballus OX=9796 GN=LOC100050760 PE=4 SV=1
	F7D0B5	Beta-1,4-glucuronyltransferase 1 OS=Equus caballus OX=9796 GN=B4GAT1 PE=4 SV=1
	F6SQ90	Uncharacterized protein OS=Equus caballus OX=9796 PE=4 SV=1
	Uniprot-Horse	Decoy	False discovery rate
Peptide matches above identity threshold	37	0	0
Select Summary Report (scores adjusted by Percolator)
			Help
	Significance threshold p<	Max. number of hits	Show Percolator scores
	Standard scoring MudPIT scoring	Ions score or expect cut-off	Show sub-sets
	Show pop-ups Suppress pop-ups		Require bold red
	Preferred taxonomy
All queries Unassigned Below homology threshold Below identity threshold
1.	F6RDD3 Mass: 16129 Score: 991 Matches: 7(7) Sequences: 5(5) emPAI: 2.81
	Globin A1 OS=Equus caballus OX=9796 GN=HBB PE=3 SV=1
	Query	Observed	Mr(expt)	Mr(calc)	ppm	Miss	Score	Expect	Rank	Unique	Peptide
	721	575.3378	1148.6611	1148.6666	-4.76	0	(153)	5.3e-016	1	U	K.VVAGVANALAHK.Y
	722	383.8952	1148.6638	1148.6666	-2.44	0	153	5.3e-016	1	U	K.VVAGVANALAHK.Y
	785	633.4177	1264.8209	1264.8231	-1.73	0	153	5.3e-016	1	U	R.LLGNVLVVVLAR.H
	856	679.8278	1357.6410	1357.6474	-4.71	0	153	5.3e-016	1	U	K.VNEEEVGGEALGR.L
	884	713.8446	1425.6747	1425.6776	-2.06	0	153	5.3e-016	1	U	K.DFTPELQASYQK.V
	959	601.3121	1800.9146	1800.9271	-6.97	0	(153)	5.3e-016	1	U	K.VLHSFGEGVHHLDNLK.G
	961	451.2380	1800.9228	1800.9271	-2.40	0	153	5.3e-016	1	U	K.VLHSFGEGVHHLDNLK.G
	Proteins matching the same set of peptides:
	P02062 Mass: 15998 Score: 991 Matches: 7(7) Sequences: 5(5)
	Hemoglobin subunit beta OS=Equus caballus OX=9796 GN=HBB PE=1 SV=1
2.	F6SJK9 Mass: 39128 Score: 932 Matches: 7(7) Sequences: 5(5) emPAI: 0.50
	Uncharacterized protein OS=Equus caballus OX=9796 PE=3 SV=1
	Query	Observed	Mr(expt)	Mr(calc)	ppm	Miss	Score	Expect	Rank	Unique	Peptide
	609	516.3019	1030.5892	1030.5910	-1.76	0	153	5.3e-016	1	U	R.VLDELTLTK.A
	701	553.7628	1105.5110	1105.5186	-6.91	0	(153)	5.3e-016	1	U	K.VTMQNLNDR.L 702 704
	730	583.2930	1164.5714	1164.5775	-5.22	0	153	5.3e-016	1	U	R.LENEIQTYR.S
	864	691.3253	1380.6360	1380.6408	-3.53	0	153	5.3e-016	1	U	R.ALEESNYELEGK.I
	866	695.8444	1389.6743	1389.6736	0.53	0	153	5.3e-016	1	U	K.QSLEASLAETEGR.Y
	Proteins matching the same set of peptides:
	F6SQQ0 Mass: 42063 Score: 932 Matches: 7(7) Sequences: 5(5)
	Uncharacterized protein OS=Equus caballus OX=9796 PE=3 SV=1
	F6SS14 Mass: 49929 Score: 932 Matches: 7(7) Sequences: 5(5)
	Uncharacterized protein OS=Equus caballus OX=9796 PE=3 SV=1
	F6WDW3 Mass: 42694 Score: 932 Matches: 7(7) Sequences: 5(5)
	Uncharacterized protein OS=Equus caballus OX=9796 PE=3 SV=1
3.	F7B7X0 Mass: 66053 Score: 923 Matches: 9(8) Sequences: 5(5) emPAI: 0.27
	Keratin 1 OS=Equus caballus OX=9796 GN=KRT1 PE=3 SV=1
	Query	Observed	Mr(expt)	Mr(calc)	ppm	Miss	Score	Expect	Rank	Unique	Peptide
	617	517.2619	1032.5093	1032.5087	0.51	0	56	2.4e-006	1	U	R.TLLEGEESR.M 616
	657	533.2617	1064.5089	1064.5138	-4.62	0	(153)	5.3e-016	1	U	R.AQYEDIAQK.S 656 658 660
	784	633.3231	1264.6316	1264.6299	1.31	0	153	5.3e-016	1	U	R.TNAENEFVTIK.K
	874	465.2475	1392.7208	1392.7249	-2.95	1	153	5.3e-016	1	U	R.TNAENEFVTIKK.D
	892	738.3937	1474.7729	1474.7780	-3.43	0	153	5.3e-016	1		R.FLEQQNQVLQTK.W
4.	F6X1X3 Mass: 21514 Score: 572 Matches: 4(4) Sequences: 2(2) emPAI: 0.34
	Vitelline membrane outer layer 1 homolog OS=Equus caballus OX=9796 GN=VMO1 PE=4 SV=1
	Query	Observed	Mr(expt)	Mr(calc)	ppm	Miss	Score	Expect	Rank	Unique	Peptide
	925	566.9367	1697.7883	1697.7969	-5.05	0	(153)	5.3e-016	1	U	R.GNAELNTHVVESESGR.W 926
	940	886.9044	1771.7942	1771.8159	-12.27	0	(153)	5.3e-016	1	U	R.VEAPMTPGDNTAANNVR.F 941
5.	F6SHJ8 Mass: 61290 Score: 292 Matches: 2(2) Sequences: 2(2) emPAI: 0.11
	Uncharacterized protein OS=Equus caballus OX=9796 PE=3 SV=1
	Query	Observed	Mr(expt)	Mr(calc)	ppm	Miss	Score	Expect	Rank	Unique	Peptide
	723	578.2749	1154.5353	1154.5278	6.49	0	153	5.3e-016	1	U	R.DYQELMNVK.L
	892	738.3937	1474.7729	1474.7780	-3.43	0	153	5.3e-016	1		R.FLEQQNQVLQTK.W
6.	F6R1I4 Mass: 9679 Score: 201 Matches: 2(2) Sequences: 2(2) emPAI: 0.85
	Uteroglobin OS=Equus caballus OX=9796 GN=SCGB1A1 PE=4 SV=1
	Query	Observed	Mr(expt)	Mr(calc)	ppm	Miss	Score	Expect	Rank	Unique	Peptide
	524	459.7629	917.5112	917.5182	-7.60	1	97	1.9e-010	1	U	K.NTKDSILK.L
	555	466.7781	931.5416	931.5379	4.00	0	117	1.9e-012	1	U	K.TLVDFLPK.N
	Proteins matching the same set of peptides:
	F6ZSQ2 Mass: 9694 Score: 201 Matches: 2(2) Sequences: 2(2)
	Uteroglobin OS=Equus caballus OX=9796 GN=SCGB1A1 PE=4 SV=1
	F7B739 Mass: 9635 Score: 201 Matches: 2(2) Sequences: 2(2)
	Uncharacterized protein OS=Equus caballus OX=9796 PE=4 SV=1
	Q8MKG2 Mass: 9667 Score: 201 Matches: 2(2) Sequences: 2(2)
	Uteroglobin OS=Equus caballus OX=9796 GN=SCGB1A1 PE=2 SV=2
7.	F6QAU5 Mass: 11433 Score: 153 Matches: 1(1) Sequences: 1(1) emPAI: 0.30
	Uncharacterized protein OS=Equus caballus OX=9796 PE=4 SV=1
	Query	Observed	Mr(expt)	Mr(calc)	ppm	Miss	Score	Expect	Rank	Unique	Peptide
	608	516.2571	1030.4997	1030.5083	-8.35	0	153	5.3e-016	1	U	K.YAASSYLTR.T
	Proteins matching the same set of peptides:
	F6SQD7 Mass: 11220 Score: 153 Matches: 1(1) Sequences: 1(1)
	Uncharacterized protein OS=Equus caballus OX=9796 PE=4 SV=1
	F7CAC5 Mass: 12224 Score: 153 Matches: 1(1) Sequences: 1(1)
	Uncharacterized protein OS=Equus caballus OX=9796 PE=4 SV=1
8.	F6S8W6 Mass: 59219 Score: 153 Matches: 1(1) Sequences: 1(1) emPAI: 0.06
	Keratin 75 OS=Equus caballus OX=9796 GN=KRT75 PE=3 SV=1
	Query	Observed	Mr(expt)	Mr(calc)	ppm	Miss	Score	Expect	Rank	Unique	Peptide
	798	651.8486	1301.6826	1301.7078	-19.38	0	153	5.3e-016	1	U	R.SLDLDSIIAEVK.A
	Proteins matching the same set of peptides:
	F6W7V0 Mass: 62397 Score: 153 Matches: 1(1) Sequences: 1(1)
	Keratin 5 OS=Equus caballus OX=9796 GN=KRT5 PE=3 SV=1
	F6ZND8 Mass: 59832 Score: 153 Matches: 1(1) Sequences: 1(1)
	Uncharacterized protein OS=Equus caballus OX=9796 GN=KRT6C PE=3 SV=1
	F7AGY4 Mass: 60145 Score: 153 Matches: 1(1) Sequences: 1(1)
	Uncharacterized protein OS=Equus caballus OX=9796 PE=3 SV=1
	F7D281 Mass: 59851 Score: 153 Matches: 1(1) Sequences: 1(1)
	Uncharacterized protein OS=Equus caballus OX=9796 GN=KRT6B PE=3 SV=1
9.	F6T323 Mass: 27112 Score: 153 Matches: 1(1) Sequences: 1(1) emPAI: 0.12
	Uncharacterized protein OS=Equus caballus OX=9796 GN=LOC100055297 PE=3 SV=1
	Query	Observed	Mr(expt)	Mr(calc)	ppm	Miss	Score	Expect	Rank	Unique	Peptide
	1008	746.3647	2236.0722	2236.1011	-12.93	0	153	5.3e-016	1	U	R.LGEYNIEVVEGNEQFINAAK.I
10.	F6UL68 Mass: 15852 Score: 153 Matches: 1(1) Sequences: 1(1) emPAI: 0.21
	Transthyretin OS=Equus caballus OX=9796 GN=TTR PE=3 SV=1
	Query	Observed	Mr(expt)	Mr(calc)	ppm	Miss	Score	Expect	Rank	Unique	Peptide
	564	479.2510	956.4875	956.4927	-5.48	0	153	5.3e-016	1	U	R.GSPAANVDVK.V
11.	F6YIA9 Mass: 48003 Score: 153 Matches: 1(1) Sequences: 1(1) emPAI: 0.07
	Uncharacterized protein OS=Equus caballus OX=9796 GN=KRT17 PE=3 SV=1
	Query	Observed	Mr(expt)	Mr(calc)	ppm	Miss	Score	Expect	Rank	Unique	Peptide
	858	681.3430	1360.6715	1360.6834	-8.77	0	153	5.3e-016	1	U	R.EVATNSELVQSGK.S
	Proteins matching the same set of peptides:
	F7ATL5 Mass: 41012 Score: 153 Matches: 1(1) Sequences: 1(1)
	Keratin 14 OS=Equus caballus OX=9796 GN=KRT14 PE=3 SV=1
12.	F6ZWS7 Mass: 11486 Score: 153 Matches: 1(1) Sequences: 1(1) emPAI: 0.30
	Uncharacterized protein OS=Equus caballus OX=9796 GN=LOC100050760 PE=4 SV=1
	Query	Observed	Mr(expt)	Mr(calc)	ppm	Miss	Score	Expect	Rank	Unique	Peptide
	992	676.3510	2026.0310	2026.0483	-8.53	0	153	5.3e-016	1	U	K.SLPHENKPLALSSYQTNK.A
	Proteins matching the same set of peptides:
	F7APS1 Mass: 11059 Score: 153 Matches: 1(1) Sequences: 1(1)
	Uncharacterized protein OS=Equus caballus OX=9796 GN=LOC100050835 PE=4 SV=1
13.	F7D0B5 Mass: 44857 Score: 153 Matches: 1(1) Sequences: 1(1) emPAI: 0.07
	Beta-1,4-glucuronyltransferase 1 OS=Equus caballus OX=9796 GN=B4GAT1 PE=4 SV=1
	Query	Observed	Mr(expt)	Mr(calc)	ppm	Miss	Score	Expect	Rank	Unique	Peptide
	898	498.5793	1492.7162	1492.7059	6.94	1	153	5.3e-016	1	U	K.FHPQKEAENQHK.I
14.	F6SQ90 Mass: 58698 Score: 86 Matches: 1(1) Sequences: 1(1) emPAI: 0.06
	Uncharacterized protein OS=Equus caballus OX=9796 PE=4 SV=1
	Query	Observed	Mr(expt)	Mr(calc)	ppm	Miss	Score	Expect	Rank	Unique	Peptide
	771	618.2678	1234.5210	1233.5309	803	1	86	2.7e-009	1	U	R.CHRDGNNFSK.N
Mascot: http://www.matrixscience.com/

## Sheet: Band 2
Mascot Search Results
Search title : Uniprot_Horse_25ppm-05Da
MS data file : 56294995342143259.mgf
Database : Uniprot-Horse UP000002281-25-02-2019 (22705 sequences; 12757064 residues)
Timestamp : 5 Apr 2019 at 16:39:02 GMT
Enzyme : Trypsin
Variable modifications : Carbamidomethyl (C),Deamidated (NQ),Oxidation (M)
Mass values : Monoisotopic
Protein Mass : Unrestricted
Peptide Mass Tolerance : ± 25 ppm (# 13C = 1)
Fragment Mass Tolerance: ± 0.06 Da
Max Missed Cleavages : 1
Instrument type : ESI-QUAD-TOF
Number of queries : 1331
Protein hits :	F6RDD3	Globin A1 OS=Equus caballus OX=9796 GN=HBB PE=3 SV=1
	P01958	Hemoglobin subunit alpha OS=Equus caballus OX=9796 GN=HBA PE=1 SV=2
	F6SJK9	Uncharacterized protein OS=Equus caballus OX=9796 PE=3 SV=1
	F7B7X0	Keratin 1 OS=Equus caballus OX=9796 GN=KRT1 PE=3 SV=1
	F6X1X3	Vitelline membrane outer layer 1 homolog OS=Equus caballus OX=9796 GN=VMO1 PE=4 SV=1
	F6WGX6	Keratin 77 OS=Equus caballus OX=9796 GN=KRT77 PE=3 SV=1
	F6YIA9	Uncharacterized protein OS=Equus caballus OX=9796 GN=KRT17 PE=3 SV=1
	F6T323	Uncharacterized protein OS=Equus caballus OX=9796 GN=LOC100055297 PE=3 SV=1
	F7CU94	Lysozyme OS=Equus caballus OX=9796 GN=LYZ PE=2 SV=1
	F6ZND8	Uncharacterized protein OS=Equus caballus OX=9796 GN=KRT6C PE=3 SV=1
	F6W7V0	Keratin 5 OS=Equus caballus OX=9796 GN=KRT5 PE=3 SV=1
	F6RM73	Apolipoprotein A-II OS=Equus caballus OX=9796 GN=APOA2 PE=4 SV=1
	F6R1I4	Uteroglobin OS=Equus caballus OX=9796 GN=SCGB1A1 PE=4 SV=1
	F7DMT7	Importin subunit alpha OS=Equus caballus OX=9796 GN=KPNA5 PE=3 SV=1
	F6TEI8	Profilin OS=Equus caballus OX=9796 PE=3 SV=1
	F6W1N4	Uncharacterized protein OS=Equus caballus OX=9796 GN=PIGR PE=4 SV=1
	F6UCT0	TSC22 domain family member 3 OS=Equus caballus OX=9796 GN=TSC22D3 PE=4 SV=1
Select Summary Report
			Help
	Significance threshold p<	Max. number of hits
	Standard scoring MudPIT scoring	Ions score or expect cut-off	Show sub-sets
	Show pop-ups Suppress pop-ups		Require bold red
	Preferred taxonomy
All queries Unassigned Below homology threshold Below identity threshold
1.	F6RDD3 Mass: 16129 Score: 1437 Matches: 34(30) Sequences: 14(13) emPAI: 30.19
	Globin A1 OS=Equus caballus OX=9796 GN=HBB PE=3 SV=1
	Query	Observed	Mr(expt)	Mr(calc)	ppm	Miss	Score	Expect	Rank	Unique	Peptide
	450	493.7900	985.5655	985.5596	5.90	0	56	0.00018	1	U	K.AAVLALWDK.V
	489	519.2516	1036.4887	1035.4906	964	0	23	0.46	1	U	-.MVQLSGEEK.A
	597	563.7850	1125.5555	1125.5567	-1.05	0	39	0.011	1	U	K.LHVDPENFR.L
	634	575.3376	1148.6607	1148.6666	-5.08	0	103	1.4e-009	1	U	K.VVAGVANALAHK.Y 635
	636	383.8953	1148.6640	1148.6666	-2.28	0	(65)	7.6e-006	1	U	K.VVAGVANALAHK.Y 633
	637	575.8331	1149.6516	1149.6506	0.87	0	(87)	5.6e-008	1	U	K.VVAGVANALAHK.Y
	638	384.2246	1149.6520	1149.6506	1.23	0	(68)	4.3e-006	1	U	K.VVAGVANALAHK.Y
	721	633.4034	1264.7923	1264.8231	-24.32	0	56	9.2e-006	1	U	R.LLGNVLVVVLAR.H
	724	637.8671	1273.7196	1273.7183	1.01	0	65	1.5e-005	1	U	R.LLVVYPWTQR.F
	794	679.8343	1357.6540	1357.6474	4.92	0	74	3.8e-006	1	U	K.VNEEEVGGEALGR.L 793
	848	713.8429	1425.6712	1425.6776	-4.46	0	75	2.7e-006	1	U	K.DFTPELQASYQK.V 849 850 851 852
	853	714.3356	1426.6567	1426.6616	-3.43	0	(58)	0.00013	1	U	K.DFTPELQASYQK.V
	854	714.3388	1426.6631	1426.6616	1.02	0	(59)	0.00011	1	U	K.DFTPELQASYQK.V
	871	483.9412	1448.8017	1448.7888	8.86	1	77	9.8e-007	1	U	K.VVAGVANALAHKYH.-
	1078	451.2375	1800.9211	1800.9271	-3.35	0	(50)	0.00099	1	U	K.VLHSFGEGVHHLDNLK.G 1081
	1079	601.3143	1800.9212	1800.9271	-3.31	0	60	9.9e-005	1	U	K.VLHSFGEGVHHLDNLK.G 1076
	1145	632.6451	1894.9134	1894.9214	-4.19	1	63	5e-005	1	U	R.HFGKDFTPELQASYQK.V 1143
	1171	483.2603	1929.0120	1929.0221	-5.21	1	42	0.0044	1	U	K.KVLHSFGEGVHHLDNLK.G 1174 1175 1177
	1208	1008.4493	2014.8840	2014.9095	-12.65	0	140	6.6e-013	1	U	R.FFDSFGDLSNPGAVMGNPK.V 1207
	1270	776.0589	2325.1549	2325.1964	-17.88	1	120	1.1e-010	1	U	K.AAVLALWDKVNEEEVGGEALGR.L
2.	P01958 Mass: 15236 Score: 492 Matches: 18(14) Sequences: 6(5) emPAI: 10.24
	Hemoglobin subunit alpha OS=Equus caballus OX=9796 GN=HBA PE=1 SV=2
	Query	Observed	Mr(expt)	Mr(calc)	ppm	Miss	Score	Expect	Rank	Unique	Peptide
	353	409.7244	817.4342	817.4334	0.94	0	31	0.088	1	U	R.VDPVNFK.L
	498	521.2729	1040.5313	1040.5365	-4.95	0	(38)	0.0087	1	U	R.MFLGFPTTK.T
	521	529.2734	1056.5322	1056.5314	0.74	0	51	0.00047	1	U	R.MFLGFPTTK.T 520
	564	544.3134	1086.6122	1086.6186	-5.91	1	52	0.00053	1	U	K.LRVDPVNFK.L 563
	624	382.5543	1144.6410	1144.6452	-3.61	1	(30)	0.072	1	U	M.VLSAADKTNVK.A 622
	626	573.3298	1144.6451	1144.6452	-0.05	1	69	8e-006	1	U	M.VLSAADKTNVK.A 625
	628	573.8221	1145.6296	1145.6292	0.38	1	(61)	6.7e-005	1	U	M.VLSAADKTNVK.A
	629	382.8843	1145.6312	1145.6292	1.75	1	(33)	0.043	1	U	M.VLSAADKTNVK.A
	723	634.8577	1267.7008	1267.7024	-1.26	0	75	1.1e-006	1	U	K.FLSSVSTVLTSK.Y 722
	1110	917.4524	1832.8902	1832.8846	3.07	0	64	5e-005	1	U	K.TYFPHFDLSHGSAQVK.A
	1112	611.9719	1832.8939	1832.8846	5.10	0	(61)	8.7e-005	1	U	K.TYFPHFDLSHGSAQVK.A 1109
	1118	612.2974	1833.8704	1833.8686	1.00	0	(36)	0.033	1	U	K.TYFPHFDLSHGSAQVK.A
3.	F6SJK9 Mass: 39128 Score: 259 Matches: 10(7) Sequences: 10(7) emPAI: 1.07
	Uncharacterized protein OS=Equus caballus OX=9796 PE=3 SV=1
	Query	Observed	Mr(expt)	Mr(calc)	ppm	Miss	Score	Expect	Rank	Unique	Peptide
	348	404.2051	806.3957	806.3923	4.30	0	37	0.023	1		R.LAADDFR.L
	349	405.2234	808.4322	808.4330	-1.01	0	25	0.16	1		R.LASYLDK.V
	466	502.2799	1002.5453	1002.5458	-0.51	1	41	0.0092	1	U	K.SEITELRR.T
	482	516.2991	1030.5836	1030.5910	-7.21	0	27	0.16	1	U	R.VLDELTLTK.A
	568	545.7680	1089.5215	1089.5237	-2.04	0	50	0.001	1	U	K.VTMQNLNDR.L
	580	555.2520	1108.4894	1108.4825	6.17	0	37	0.013	1	U	K.DAEAWFNEK.S
	652	583.2947	1164.5749	1164.5775	-2.18	0	60	9.8e-005	1	U	R.LENEIQTYR.S
	705	619.2957	1236.5768	1236.5775	-0.58	1	27	0.16	1	U	R.KDAEAWFNEK.S
	807	691.3287	1380.6429	1380.6408	1.51	0	87	1.7e-007	1	U	R.ALEESNYELEGK.I
	816	695.8436	1389.6726	1389.6736	-0.70	0	98	1.9e-008	1	U	K.QSLEASLAETEGR.Y
	Proteins matching the same set of peptides:
	F6SQQ0 Mass: 42063 Score: 259 Matches: 10(7) Sequences: 10(7)
	Uncharacterized protein OS=Equus caballus OX=9796 PE=3 SV=1
	F6SS14 Mass: 49929 Score: 259 Matches: 10(7) Sequences: 10(7)
	Uncharacterized protein OS=Equus caballus OX=9796 PE=3 SV=1
	F6WDW3 Mass: 42694 Score: 259 Matches: 10(7) Sequences: 10(7)
	Uncharacterized protein OS=Equus caballus OX=9796 PE=3 SV=1
4.	F7B7X0 Mass: 66053 Score: 169 Matches: 6(5) Sequences: 5(4) emPAI: 0.27
	Keratin 1 OS=Equus caballus OX=9796 GN=KRT1 PE=3 SV=1
	Query	Observed	Mr(expt)	Mr(calc)	ppm	Miss	Score	Expect	Rank	Unique	Peptide
	487	517.2582	1032.5019	1032.5087	-6.59	0	47	0.0025	1	U	R.TLLEGEESR.M
	531	533.2590	1064.5035	1064.5138	-9.67	0	27	0.18	1	U	R.AQYEDIAQK.S
	720	633.3220	1264.6295	1264.6299	-0.33	0	62	7.1e-005	1	U	R.TNAENEFVTIK.K
	820	465.2466	1392.7181	1392.7249	-4.86	1	40	0.0092	1	U	R.TNAENEFVTIKK.D
	898	738.3983	1474.7821	1474.7780	2.78	0	72	6.3e-006	1		R.FLEQQNQVLQTK.W 897
5.	F6X1X3 Mass: 21514 Score: 135 Matches: 4(3) Sequences: 3(3) emPAI: 0.78
	Vitelline membrane outer layer 1 homolog OS=Equus caballus OX=9796 GN=VMO1 PE=4 SV=1
	Query	Observed	Mr(expt)	Mr(calc)	ppm	Miss	Score	Expect	Rank	Unique	Peptide
	1008	566.9371	1697.7896	1697.7969	-4.30	0	54	0.00043	1	U	R.GNAELNTHVVESESGR.W
	1009	849.9023	1697.7900	1697.7969	-4.04	0	(31)	0.079	1	U	R.GNAELNTHVVESESGR.W
	1037	886.9122	1771.8099	1771.8159	-3.38	0	56	0.00022	1	U	R.VEAPMTPGDNTAANNVR.F
	1141	940.9717	1879.9288	1879.9276	0.66	0	61	8.5e-005	1	U	K.VEPQQGIPGDDTALNGIR.L
6.	F6WGX6 Mass: 62957 Score: 114 Matches: 3(3) Sequences: 2(2) emPAI: 0.11
	Keratin 77 OS=Equus caballus OX=9796 GN=KRT77 PE=3 SV=1
	Query	Observed	Mr(expt)	Mr(calc)	ppm	Miss	Score	Expect	Rank	Unique	Peptide
	896	738.3732	1474.7319	1474.7416	-6.58	0	53	0.00058	1	U	K.WELLQQVDTSTR.T
	898	738.3983	1474.7821	1474.7780	2.78	0	72	6.3e-006	1		R.FLEQQNQVLQTK.W 897
7.	F6YIA9 Mass: 48003 Score: 112 Matches: 5(4) Sequences: 5(4) emPAI: 0.30
	Uncharacterized protein OS=Equus caballus OX=9796 GN=KRT17 PE=3 SV=1
	Query	Observed	Mr(expt)	Mr(calc)	ppm	Miss	Score	Expect	Rank	Unique	Peptide
	348	404.2051	806.3957	806.3923	4.30	0	37	0.023	1		R.LAADDFR.T
	349	405.2234	808.4322	808.4330	-1.01	0	25	0.16	1		R.LASYLDK.V
	451	495.2689	988.5232	988.5301	-6.97	1	41	0.011	1	U	K.SEISELRR.T
	593	561.7920	1121.5694	1121.5717	-1.98	0	34	0.041	1		R.LEQEIATYR.R
	796	681.3511	1360.6876	1360.6834	3.08	0	79	1.7e-006	1	U	R.EVATNSELVQSGK.S
	Proteins matching the same set of peptides:
	F7ATL5 Mass: 41012 Score: 112 Matches: 5(4) Sequences: 5(4)
	Keratin 14 OS=Equus caballus OX=9796 GN=KRT14 PE=3 SV=1
8.	F6T323 Mass: 27112 Score: 70 Matches: 2(2) Sequences: 1(1) emPAI: 0.26
	Uncharacterized protein OS=Equus caballus OX=9796 GN=LOC100055297 PE=3 SV=1
	Query	Observed	Mr(expt)	Mr(calc)	ppm	Miss	Score	Expect	Rank	Unique	Peptide
	1243	1119.0559	2236.0973	2236.1011	-1.73	0	(45)	0.0032	1	U	R.LGEYNIEVVEGNEQFINAAK.I
	1244	746.3739	2236.0999	2236.1011	-0.56	0	45	0.003	1	U	R.LGEYNIEVVEGNEQFINAAK.I
9.	F7CU94 Mass: 16714 Score: 57 Matches: 4(2) Sequences: 3(2) emPAI: 0.74
	Lysozyme OS=Equus caballus OX=9796 GN=LYZ PE=2 SV=1
	Query	Observed	Mr(expt)	Mr(calc)	ppm	Miss	Score	Expect	Rank	Unique	Peptide
	337	389.2139	776.4132	776.4181	-6.24	0	27	0.17	1	U	R.LGLDGFR.G
	441	485.7678	969.5210	969.5244	-3.49	0	45	0.0015	1	U	R.VVSDPQGIR.A
	601	563.8193	1125.6240	1125.6255	-1.30	1	29	0.049	1	U	K.RVVSDPQGIR.A 602
10.	F6ZND8 Mass: 59832 Score: 54 Matches: 2(1) Sequences: 2(1) emPAI: 0.11
	Uncharacterized protein OS=Equus caballus OX=9796 GN=KRT6C PE=3 SV=1
	Query	Observed	Mr(expt)	Mr(calc)	ppm	Miss	Score	Expect	Rank	Unique	Peptide
	578	554.2728	1106.5310	1106.5356	-4.17	0	43	0.0079	1	U	K.AQYEEIAQR.S
	691	602.3248	1202.6351	1202.6295	4.63	0	31	0.079	1	U	K.WTLLQEQGTK.T
	Proteins matching the same set of peptides:
	F7AGY4 Mass: 60145 Score: 54 Matches: 2(1) Sequences: 2(1)
	Uncharacterized protein OS=Equus caballus OX=9796 PE=3 SV=1
	F7D281 Mass: 59851 Score: 54 Matches: 2(1) Sequences: 2(1)
	Uncharacterized protein OS=Equus caballus OX=9796 GN=KRT6B PE=3 SV=1
11.	F6W7V0 Mass: 62397 Score: 47 Matches: 1(1) Sequences: 1(1) emPAI: 0.05
	Keratin 5 OS=Equus caballus OX=9796 GN=KRT5 PE=3 SV=1
	Query	Observed	Mr(expt)	Mr(calc)	ppm	Miss	Score	Expect	Rank	Unique	Peptide
	683	597.7893	1193.5641	1193.5676	-3.00	0	47	0.0019	1	U	K.YEELQQTAGR.H
12.	F6RM73 Mass: 11282 Score: 42 Matches: 1(1) Sequences: 1(1) emPAI: 0.30
	Apolipoprotein A-II OS=Equus caballus OX=9796 GN=APOA2 PE=4 SV=1
	Query	Observed	Mr(expt)	Mr(calc)	ppm	Miss	Score	Expect	Rank	Unique	Peptide
	668	594.3029	1186.5913	1186.5870	3.60	0	42	0.0056	1	U	R.YLQTVTDYGK.D
	Proteins matching the same set of peptides:
	P83704 Mass: 8611 Score: 42 Matches: 1(1) Sequences: 1(1)
	Apolipoprotein A-II OS=Equus caballus OX=9796 GN=APOA2 PE=1 SV=1
13.	F6R1I4 Mass: 9679 Score: 42 Matches: 1(1) Sequences: 1(1) emPAI: 0.36
	Uteroglobin OS=Equus caballus OX=9796 GN=SCGB1A1 PE=4 SV=1
	Query	Observed	Mr(expt)	Mr(calc)	ppm	Miss	Score	Expect	Rank	Unique	Peptide
	422	466.7726	931.5307	931.5379	-7.72	0	42	0.004	1	U	K.TLVDFLPK.N
	Proteins matching the same set of peptides:
	F6ZSQ2 Mass: 9694 Score: 42 Matches: 1(1) Sequences: 1(1)
	Uteroglobin OS=Equus caballus OX=9796 GN=SCGB1A1 PE=4 SV=1
	F7B739 Mass: 9635 Score: 42 Matches: 1(1) Sequences: 1(1)
	Uncharacterized protein OS=Equus caballus OX=9796 PE=4 SV=1
	Q8MKG2 Mass: 9667 Score: 42 Matches: 1(1) Sequences: 1(1)
	Uteroglobin OS=Equus caballus OX=9796 GN=SCGB1A1 PE=2 SV=2
14.	F7DMT7 Score: 32 Matches: 2(1) Sequences: 1(1) emPAI: 0.06
	Importin subunit alpha OS=Equus caballus OX=9796 GN=KPNA5 PE=3 SV=1
	Query	Observed	Mr(expt)	Mr(calc)	ppm	Miss	Score	Expect	Rank	Unique	Peptide
	368	421.7572	841.4999	840.4930	1198	1	32	0.021	1	U	R.RNVSLPR.N 369
15.	F6TEI8 Mass: 14990 Score: 29 Matches: 1(0) Sequences: 1(0) emPAI: 0.23
	Profilin OS=Equus caballus OX=9796 PE=3 SV=1
	Query	Observed	Mr(expt)	Mr(calc)	ppm	Miss	Score	Expect	Rank	Unique	Peptide
	1021	856.9304	1711.8462	1711.8451	0.62	0	29	0.13	1	U	K.STGGAPTFNITVTMTAK.M
	Proteins matching the same set of peptides:
	F6UJ33 Mass: 15034 Score: 29 Matches: 1(0) Sequences: 1(0)
	Profilin OS=Equus caballus OX=9796 GN=PFN1 PE=3 SV=1
16.	F6W1N4 Mass: 82952 Score: 29 Matches: 1(0) Sequences: 1(0) emPAI: 0.04
	Uncharacterized protein OS=Equus caballus OX=9796 GN=PIGR PE=4 SV=1
	Query	Observed	Mr(expt)	Mr(calc)	ppm	Miss	Score	Expect	Rank	Unique	Peptide
	454	496.2590	990.5035	990.5094	-5.97	0	29	0.15	1	U	K.GTGSGALSSVR.A
17.	F6UCT0 Mass: 14866 Score: 26 Matches: 1(0) Sequences: 1(0) emPAI: 0.23
	TSC22 domain family member 3 OS=Equus caballus OX=9796 GN=TSC22D3 PE=4 SV=1
	Query	Observed	Mr(expt)	Mr(calc)	ppm	Miss	Score	Expect	Rank	Unique	Peptide
	971	521.9169	1562.7290	1561.7471	629	0	26	0.28	1	U	K.LDNSASGASVVAIDNK.I
Mascot: http://www.matrixscience.com/

## Sheet: Band 3
Mascot Search Results
Search title : Uniprot_Horse_25ppm-05Da
MS data file : 56294995342143269.mgf
Database : Uniprot-Horse UP000002281-25-02-2019 (22705 sequences; 12757064 residues)
Timestamp : 5 Apr 2019 at 17:02:18 GMT
Enzyme : Trypsin
Variable modifications : Carbamidomethyl (C),Deamidated (NQ),Oxidation (M)
Mass values : Monoisotopic
Protein Mass : Unrestricted
Peptide Mass Tolerance : ± 25 ppm (# 13C = 1)
Fragment Mass Tolerance: ± 0.06 Da
Max Missed Cleavages : 1
Instrument type : ESI-QUAD-TOF
Number of queries : 1035
Protein hits :	F6RDD3	Globin A1 OS=Equus caballus OX=9796 GN=HBB PE=3 SV=1
	P01958	Hemoglobin subunit alpha OS=Equus caballus OX=9796 GN=HBA PE=1 SV=2
	F6SJK9	Uncharacterized protein OS=Equus caballus OX=9796 PE=3 SV=1
	F7B7X0	Keratin 1 OS=Equus caballus OX=9796 GN=KRT1 PE=3 SV=1
	F6SHJ8	Uncharacterized protein OS=Equus caballus OX=9796 PE=3 SV=1
	F6WGX6	Keratin 77 OS=Equus caballus OX=9796 GN=KRT77 PE=3 SV=1
	F6X1X3	Vitelline membrane outer layer 1 homolog OS=Equus caballus OX=9796 GN=VMO1 PE=4 SV=1
	F6QDH8	Alpha-amylase OS=Equus caballus OX=9796 GN=LOC100051073 PE=3 SV=1
	F7CU94	Lysozyme OS=Equus caballus OX=9796 GN=LYZ PE=2 SV=1
	F6ZND8	Uncharacterized protein OS=Equus caballus OX=9796 GN=KRT6C PE=3 SV=1
	F6R1I4	Uteroglobin OS=Equus caballus OX=9796 GN=SCGB1A1 PE=4 SV=1
	F7DMT7	Importin subunit alpha OS=Equus caballus OX=9796 GN=KPNA5 PE=3 SV=1
	F6S9A0	Serine dehydratase OS=Equus caballus OX=9796 GN=SDS PE=4 SV=1
	F7CM17	Pentatricopeptide repeat domain 2 OS=Equus caballus OX=9796 GN=PTCD2 PE=4 SV=1
Select Summary Report
			Help
	Significance threshold p<	Max. number of hits
	Standard scoring MudPIT scoring	Ions score or expect cut-off	Show sub-sets
	Show pop-ups Suppress pop-ups		Require bold red
	Preferred taxonomy
All queries Unassigned Below homology threshold Below identity threshold
1.	F6RDD3 Mass: 16129 Score: 605 Matches: 17(15) Sequences: 8(7) emPAI: 7.19
	Globin A1 OS=Equus caballus OX=9796 GN=HBB PE=3 SV=1
	Query	Observed	Mr(expt)	Mr(calc)	ppm	Miss	Score	Expect	Rank	Unique	Peptide
	416	493.7888	985.5630	985.5596	3.43	0	70	7.6e-006	1	U	K.AAVLALWDK.V
	583	563.7875	1125.5604	1125.5567	3.29	0	25	0.23	1	U	K.LHVDPENFR.L
	615	383.8957	1148.6652	1148.6666	-1.24	0	(72)	1.8e-006	1	U	K.VVAGVANALAHK.Y
	616	575.3416	1148.6686	1148.6666	1.72	0	81	1.7e-007	1	U	K.VVAGVANALAHK.Y
	617	575.8289	1149.6433	1149.6506	-6.35	0	(62)	2.1e-005	1	U	K.VVAGVANALAHK.Y
	678	633.4182	1264.8219	1264.8231	-0.96	0	42	0.0001	1	U	R.LLGNVLVVVLAR.H
	687	637.8675	1273.7204	1273.7183	1.68	0	57	9.4e-005	1	U	R.LLVVYPWTQR.F
	756	679.8322	1357.6499	1357.6474	1.86	0	69	1.2e-005	1	U	K.VNEEEVGGEALGR.L 755
	758	680.3246	1358.6347	1358.6314	2.49	0	(54)	0.00033	1	U	K.VNEEEVGGEALGR.L
	800	713.8459	1425.6772	1425.6776	-0.26	0	(59)	0.00011	1	U	K.DFTPELQASYQK.V 799 801
	802	714.3383	1426.6621	1426.6616	0.34	0	61	6.8e-005	1	U	K.DFTPELQASYQK.V
	803	714.3395	1426.6644	1426.6616	1.96	0	(57)	0.00016	1	U	K.DFTPELQASYQK.V
	999	1008.4611	2014.9077	2014.9095	-0.90	0	77	1.5e-006	1	U	R.FFDSFGDLSNPGAVMGNPK.V 1000
	Proteins matching the same set of peptides:
	P02062 Mass: 15998 Score: 605 Matches: 17(15) Sequences: 8(7)
	Hemoglobin subunit beta OS=Equus caballus OX=9796 GN=HBB PE=1 SV=1
2.	P01958 Mass: 15236 Score: 441 Matches: 17(13) Sequences: 7(7) emPAI: 6.51
	Hemoglobin subunit alpha OS=Equus caballus OX=9796 GN=HBA PE=1 SV=2
	Query	Observed	Mr(expt)	Mr(calc)	ppm	Miss	Score	Expect	Rank	Unique	Peptide
	303	409.7246	817.4347	817.4334	1.54	0	(32)	0.084	1	U	R.VDPVNFK.L
	305	410.2173	818.4201	818.4174	3.32	0	39	0.017	1	U	R.VDPVNFK.L
	472	521.2800	1040.5454	1040.5365	8.54	0	(46)	0.0013	1	U	R.MFLGFPTTK.T
	501	529.2768	1056.5390	1056.5314	7.21	0	48	0.0011	1	U	R.MFLGFPTTK.T 499 500
	547	544.3177	1086.6208	1086.6186	2.07	1	32	0.043	1	U	K.LRVDPVNFK.L
	606	573.3309	1144.6473	1144.6452	1.87	1	68	8.6e-006	1	U	M.VLSAADKTNVK.A 608
	611	573.8254	1145.6362	1145.6292	6.13	1	(50)	0.00064	1	U	M.VLSAADKTNVK.A 609
	679	634.8557	1267.6968	1267.7024	-4.44	0	76	1.1e-006	1	U	K.FLSSVSTVLTSK.Y 681 682 683
	856	505.9124	1514.7154	1514.7113	2.69	0	33	0.051	1	U	K.VGGHAGEYGAEALER.M
	968	611.9669	1832.8789	1832.8846	-3.09	0	55	0.00036	1	U	K.TYFPHFDLSHGSAQVK.A
3.	F6SJK9 Mass: 39128 Score: 256 Matches: 14(9) Sequences: 10(8) emPAI: 1.44
	Uncharacterized protein OS=Equus caballus OX=9796 PE=3 SV=1
	Query	Observed	Mr(expt)	Mr(calc)	ppm	Miss	Score	Expect	Rank	Unique	Peptide
	298	405.2257	808.4368	808.4330	4.65	0	31	0.037	1	U	R.LASYLDK.V
	429	498.2634	994.5122	994.5123	-0.10	1	25	0.22	1	U	K.IKEWYEK.H 428 430 431
	457	516.3005	1030.5864	1030.5910	-4.48	0	38	0.009	1	U	R.VLDELTLTK.A
	550	545.7712	1089.5279	1089.5237	3.90	0	41	0.0085	1	U	K.VTMQNLNDR.L
	566	555.2480	1108.4815	1108.4825	-0.88	0	36	0.016	1	U	K.DAEAWFNEK.S
	626	583.2972	1164.5798	1164.5775	2.01	0	44	0.0044	1	U	R.LENEIQTYR.S
	649	601.3138	1200.6131	1200.6098	2.74	0	(36)	0.022	1	U	R.QSVEADINGLR.R
	654	601.8080	1201.6015	1201.5939	6.39	0	66	2.5e-005	1	U	R.QSVEADINGLR.R
	757	679.8551	1357.6957	1357.6950	0.51	1	29	0.14	1	U	R.QSVEADINGLRR.V
	772	691.3289	1380.6432	1380.6408	1.68	0	87	1.9e-007	1	U	R.ALEESNYELEGK.I
	775	695.8447	1389.6748	1389.6736	0.88	0	70	1.2e-005	1	U	K.QSLEASLAETEGR.Y
	Proteins matching the same set of peptides:
	F6SQQ0 Mass: 42063 Score: 256 Matches: 14(9) Sequences: 10(8)
	Uncharacterized protein OS=Equus caballus OX=9796 PE=3 SV=1
	F6SS14 Mass: 49929 Score: 256 Matches: 14(9) Sequences: 10(8)
	Uncharacterized protein OS=Equus caballus OX=9796 PE=3 SV=1
	F6WDW3 Mass: 42694 Score: 256 Matches: 14(9) Sequences: 10(8)
	Uncharacterized protein OS=Equus caballus OX=9796 PE=3 SV=1
4.	F7B7X0 Mass: 66053 Score: 120 Matches: 4(4) Sequences: 4(4) emPAI: 0.21
	Keratin 1 OS=Equus caballus OX=9796 GN=KRT1 PE=3 SV=1
	Query	Observed	Mr(expt)	Mr(calc)	ppm	Miss	Score	Expect	Rank	Unique	Peptide
	459	517.2610	1032.5074	1032.5087	-1.27	0	45	0.0042	1	U	R.TLLEGEESR.M
	512	1065.5199	1064.5126	1064.5138	-1.12	0	41	0.0086	1	U	R.AQYEDIAQK.S
	677	633.3235	1264.6324	1264.6299	1.98	0	39	0.012	1	U	R.TNAENEFVTIK.K
	831	738.3973	1474.7801	1474.7780	1.45	0	79	1.2e-006	1		R.FLEQQNQVLQTK.W
5.	F6SHJ8 Mass: 61290 Score: 95 Matches: 2(2) Sequences: 2(2) emPAI: 0.11
	Uncharacterized protein OS=Equus caballus OX=9796 PE=3 SV=1
	Query	Observed	Mr(expt)	Mr(calc)	ppm	Miss	Score	Expect	Rank	Unique	Peptide
	656	604.8110	1207.6075	1207.6085	-0.78	0	46	0.0024	1	U	R.TAAENDFVTLK.K
	831	738.3973	1474.7801	1474.7780	1.45	0	79	1.2e-006	1		R.FLEQQNQVLQTK.W
	Proteins matching the same set of peptides:
	F7A559 Mass: 62690 Score: 95 Matches: 2(2) Sequences: 2(2)
	Uncharacterized protein OS=Equus caballus OX=9796 PE=3 SV=1
	F7AAI4 Mass: 52384 Score: 95 Matches: 2(2) Sequences: 2(2)
	Uncharacterized protein OS=Equus caballus OX=9796 PE=3 SV=1
	F7AN17 Mass: 63335 Score: 95 Matches: 2(2) Sequences: 2(2)
	Uncharacterized protein OS=Equus caballus OX=9796 PE=3 SV=1
	F7BP93 Mass: 56773 Score: 95 Matches: 2(2) Sequences: 2(2)
	Uncharacterized protein OS=Equus caballus OX=9796 PE=3 SV=1
6.	F6WGX6 Mass: 62957 Score: 94 Matches: 2(2) Sequences: 2(2) emPAI: 0.11
	Keratin 77 OS=Equus caballus OX=9796 GN=KRT77 PE=3 SV=1
	Query	Observed	Mr(expt)	Mr(calc)	ppm	Miss	Score	Expect	Rank	Unique	Peptide
	830	738.3788	1474.7431	1474.7416	1.04	0	42	0.0074	1	U	K.WELLQQVDTSTR.T
	831	738.3973	1474.7801	1474.7780	1.45	0	79	1.2e-006	1		R.FLEQQNQVLQTK.W
7.	F6X1X3 Mass: 21514 Score: 91 Matches: 3(2) Sequences: 2(2) emPAI: 0.54
	Vitelline membrane outer layer 1 homolog OS=Equus caballus OX=9796 GN=VMO1 PE=4 SV=1
	Query	Observed	Mr(expt)	Mr(calc)	ppm	Miss	Score	Expect	Rank	Unique	Peptide
	932	849.9066	1697.7987	1697.7969	1.06	0	42	0.0063	1	U	R.GNAELNTHVVESESGR.W
	933	566.9416	1697.8031	1697.7969	3.68	0	(26)	0.28	1	U	R.GNAELNTHVVESESGR.W
	948	886.9154	1771.8163	1771.8159	0.20	0	54	0.00043	1	U	R.VEAPMTPGDNTAANNVR.F
8.	F6QDH8 Mass: 57316 Score: 45 Matches: 3(1) Sequences: 3(1) emPAI: 0.18
	Alpha-amylase OS=Equus caballus OX=9796 GN=LOC100051073 PE=3 SV=1
	Query	Observed	Mr(expt)	Mr(calc)	ppm	Miss	Score	Expect	Rank	Unique	Peptide
	364	449.7391	897.4636	897.4596	4.46	0	25	0.16	1	U	R.YQPISYK.L
	628	585.3578	1168.7011	1168.7067	-4.76	0	17	0.37	1	U	R.VVGLLDLALEK.D
	1035	1085.7963	3254.3670	3254.3816	-4.49	0	31	0.034	1	U	R.IYVDAVVNHMCGSGGGAGTSSTCGSYYNAGSR.D
	Proteins matching the same set of peptides:
	F7DYB1 Mass: 57329 Score: 45 Matches: 3(1) Sequences: 3(1)
	Alpha-amylase OS=Equus caballus OX=9796 GN=LOC100049851 PE=3 SV=1
9.	F7CU94 Mass: 16714 Score: 40 Matches: 1(1) Sequences: 1(1) emPAI: 0.20
	Lysozyme OS=Equus caballus OX=9796 GN=LYZ PE=2 SV=1
	Query	Observed	Mr(expt)	Mr(calc)	ppm	Miss	Score	Expect	Rank	Unique	Peptide
	410	485.7702	969.5259	969.5244	1.61	0	40	0.0052	1	U	R.VVSDPQGIR.A
10.	F6ZND8 Mass: 59832 Score: 38 Matches: 1(1) Sequences: 1(1) emPAI: 0.05
	Uncharacterized protein OS=Equus caballus OX=9796 GN=KRT6C PE=3 SV=1
	Query	Observed	Mr(expt)	Mr(calc)	ppm	Miss	Score	Expect	Rank	Unique	Peptide
	563	554.2784	1106.5422	1106.5356	5.97	0	38	0.026	1	U	K.AQYEEIAQR.S
	Proteins matching the same set of peptides:
	F7AGY4 Mass: 60145 Score: 38 Matches: 1(1) Sequences: 1(1)
	Uncharacterized protein OS=Equus caballus OX=9796 PE=3 SV=1
	F7D281 Mass: 59851 Score: 38 Matches: 1(1) Sequences: 1(1)
	Uncharacterized protein OS=Equus caballus OX=9796 GN=KRT6B PE=3 SV=1
	F7D5X8 Mass: 64523 Score: 38 Matches: 1(1) Sequences: 1(1)
	Keratin 4 OS=Equus caballus OX=9796 GN=KRT4 PE=3 SV=1
11.	F6R1I4 Mass: 9679 Score: 35 Matches: 1(1) Sequences: 1(1) emPAI: 0.36
	Uteroglobin OS=Equus caballus OX=9796 GN=SCGB1A1 PE=4 SV=1
	Query	Observed	Mr(expt)	Mr(calc)	ppm	Miss	Score	Expect	Rank	Unique	Peptide
	393	466.7776	931.5406	931.5379	2.95	0	35	0.013	1	U	K.TLVDFLPK.N
	Proteins matching the same set of peptides:
	F6ZSQ2 Mass: 9694 Score: 35 Matches: 1(1) Sequences: 1(1)
	Uteroglobin OS=Equus caballus OX=9796 GN=SCGB1A1 PE=4 SV=1
	F7B739 Mass: 9635 Score: 35 Matches: 1(1) Sequences: 1(1)
	Uncharacterized protein OS=Equus caballus OX=9796 PE=4 SV=1
	Q8MKG2 Mass: 9667 Score: 35 Matches: 1(1) Sequences: 1(1)
	Uteroglobin OS=Equus caballus OX=9796 GN=SCGB1A1 PE=2 SV=2
12.	F7DMT7 Score: 32 Matches: 1(1) Sequences: 1(1) emPAI: 0.06
	Importin subunit alpha OS=Equus caballus OX=9796 GN=KPNA5 PE=3 SV=1
	Query	Observed	Mr(expt)	Mr(calc)	ppm	Miss	Score	Expect	Rank	Unique	Peptide
	321	421.7582	841.5019	840.4930	1200	1	32	0.022	1	U	R.RNVSLPR.N
13.	F6S9A0 Score: 29 Matches: 1(0) Sequences: 1(0) emPAI: 0.09
	Serine dehydratase OS=Equus caballus OX=9796 GN=SDS PE=4 SV=1
	Query	Observed	Mr(expt)	Mr(calc)	ppm	Miss	Score	Expect	Rank	Unique	Peptide
	277	766.3629	765.3556	764.3374	1332	0	29	0.097	1	U	K.NEGAMVK.V
14.	F7CM17 Mass: 39845 Score: 21 Matches: 1(0) Sequences: 1(0) emPAI: 0.08
	Pentatricopeptide repeat domain 2 OS=Equus caballus OX=9796 GN=PTCD2 PE=4 SV=1
	Query	Observed	Mr(expt)	Mr(calc)	ppm	Miss	Score	Expect	Rank	Unique	Peptide
	465	519.2985	1036.5824	1036.5805	1.84	0	21	0.27	1	U	R.YLLTDSVVK.L
Mascot: http://www.matrixscience.com/

## Sheet: Band 4
Mascot Search Results
Search title : Uniprot_Horse_25ppm-05Da
MS data file : 56294995342143270.mgf
Database : Uniprot-Horse UP000002281-25-02-2019 (22705 sequences; 12757064 residues)
Timestamp : 5 Apr 2019 at 17:02:20 GMT
Enzyme : Trypsin
Variable modifications : Carbamidomethyl (C),Deamidated (NQ),Oxidation (M)
Mass values : Monoisotopic
Protein Mass : Unrestricted
Peptide Mass Tolerance : ± 25 ppm (# 13C = 1)
Fragment Mass Tolerance: ± 0.06 Da
Max Missed Cleavages : 1
Instrument type : ESI-QUAD-TOF
Number of queries : 1057
Protein hits :	F6X1X3	Vitelline membrane outer layer 1 homolog OS=Equus caballus OX=9796 GN=VMO1 PE=4 SV=1
	F6SJK9	Uncharacterized protein OS=Equus caballus OX=9796 PE=3 SV=1
	F7B7X0	Keratin 1 OS=Equus caballus OX=9796 GN=KRT1 PE=3 SV=1
	F6W1N4	Uncharacterized protein OS=Equus caballus OX=9796 GN=PIGR PE=4 SV=1
	F6RDD3	Globin A1 OS=Equus caballus OX=9796 GN=HBB PE=3 SV=1
	F6WGX6	Keratin 77 OS=Equus caballus OX=9796 GN=KRT77 PE=3 SV=1
	F7AUX9	Pulmonary surfactant-associated protein A OS=Equus caballus OX=9796 GN=SFTPA1 PE=4 SV=1
	P02791	Ferritin light chain OS=Equus caballus OX=9796 GN=FTL PE=1 SV=4
	F6W7V0	Keratin 5 OS=Equus caballus OX=9796 GN=KRT5 PE=3 SV=1
	F6SHJ8	Uncharacterized protein OS=Equus caballus OX=9796 PE=3 SV=1
	F6ZND8	Uncharacterized protein OS=Equus caballus OX=9796 GN=KRT6C PE=3 SV=1
	A0A0B4J1C4	Joining chain of multimeric IgA and IgM OS=Equus caballus OX=9796 GN=JCHAIN PE=4 SV=1
	F6T323	Uncharacterized protein OS=Equus caballus OX=9796 GN=LOC100055297 PE=3 SV=1
	P01958	Hemoglobin subunit alpha OS=Equus caballus OX=9796 GN=HBA PE=1 SV=2
	F6QAU5	Uncharacterized protein OS=Equus caballus OX=9796 PE=4 SV=1
	F6QDH8	Alpha-amylase OS=Equus caballus OX=9796 GN=LOC100051073 PE=3 SV=1
	F7DMT7	Importin subunit alpha OS=Equus caballus OX=9796 GN=KPNA5 PE=3 SV=1
	F6WIP4	Lipocalin 1 OS=Equus caballus OX=9796 GN=LCN1 PE=3 SV=1
	F7CM17	Pentatricopeptide repeat domain 2 OS=Equus caballus OX=9796 GN=PTCD2 PE=4 SV=1
Select Summary Report
			Help
	Significance threshold p<	Max. number of hits
	Standard scoring MudPIT scoring	Ions score or expect cut-off	Show sub-sets
	Show pop-ups Suppress pop-ups		Require bold red
	Preferred taxonomy
All queries Unassigned Below homology threshold Below identity threshold
1.	F6X1X3 Mass: 21514 Score: 1651 Matches: 38(34) Sequences: 4(4) emPAI: 7.78
	Vitelline membrane outer layer 1 homolog OS=Equus caballus OX=9796 GN=VMO1 PE=4 SV=1
	Query	Observed	Mr(expt)	Mr(calc)	ppm	Miss	Score	Expect	Rank	Unique	Peptide
	609	651.8230	1301.6314	1301.6324	-0.72	1	70	8.3e-006	1	U	R.GLRDDTAVNDAR.F 612
	611	434.8859	1301.6359	1301.6324	2.74	1	(37)	0.019	1	U	R.GLRDDTAVNDAR.F
	614	435.2109	1302.6109	1302.6164	-4.22	1	(40)	0.0083	1	U	R.GLRDDTAVNDAR.F 616
	617	652.3228	1302.6310	1302.6164	11.2	1	(50)	0.001	1	U	R.GLRDDTAVNDAR.F
	794	849.9064	1697.7983	1697.7969	0.85	0	100	1.1e-008	1	U	R.GNAELNTHVVESESGR.W 789 791 800
	795	566.9409	1697.8007	1697.7969	2.28	0	(75)	3e-006	1	U	R.GNAELNTHVVESESGR.W 792 793 796 798
	797	850.3946	1698.7746	1698.7809	-3.68	0	(88)	1.2e-007	1	U	R.GNAELNTHVVESESGR.W 803
	799	567.2662	1698.7767	1698.7809	-2.47	0	(95)	2.6e-008	1	U	R.GNAELNTHVVESESGR.W
	801	850.3972	1698.7799	1698.7809	-0.59	0	(67)	1.7e-005	1	U	R.GNAELNTHVVESESGR.W
	802	567.2673	1698.7802	1698.7809	-0.42	0	(79)	1.2e-006	1	U	R.GNAELNTHVVESESGR.W 804
	806	567.5976	1699.7710	1699.7649	3.57	0	(37)	0.015	1	U	R.GNAELNTHVVESESGR.W
	869	878.9154	1755.8163	1755.8210	-2.69	0	(92)	5.9e-008	1	U	R.VEAPMTPGDNTAANNVR.F 868
	870	879.4113	1756.8081	1756.8050	1.76	0	(58)	0.00013	1	U	R.VEAPMTPGDNTAANNVR.F
	880	886.9161	1771.8176	1771.8159	0.96	0	109	1.2e-009	1	U	R.VEAPMTPGDNTAANNVR.F 878 879
	882	887.4082	1772.8019	1772.7999	1.10	0	(104)	3.3e-009	1	U	R.VEAPMTPGDNTAANNVR.F 881
	955	940.4788	1878.9431	1878.9436	-0.25	0	(44)	0.0037	1	U	K.VEPQQGIPGDDTALNGIR.L
	964	940.9715	1879.9284	1879.9276	0.47	0	106	2.9e-009	1	U	K.VEPQQGIPGDDTALNGIR.L 957 959 960 961 962 963
2.	F6SJK9 Mass: 39128 Score: 320 Matches: 9(9) Sequences: 9(9) emPAI: 1.07
	Uncharacterized protein OS=Equus caballus OX=9796 PE=3 SV=1
	Query	Observed	Mr(expt)	Mr(calc)	ppm	Miss	Score	Expect	Rank	Unique	Peptide
	312	404.2049	806.3953	806.3923	3.77	0	48	0.002	1	U	R.LAADDFR.L
	315	405.2260	808.4374	808.4330	5.33	0	45	0.0014	1	U	R.LASYLDK.V
	451	516.3037	1030.5929	1030.5910	1.80	0	39	0.0067	1	U	R.VLDELTLTK.A
	504	545.7683	1089.5221	1089.5237	-1.48	0	49	0.0012	1	U	K.VTMQNLNDR.L
	517	555.2465	1108.4784	1108.4825	-3.74	0	33	0.026	1	U	K.DAEAWFNEK.S
	542	583.2954	1164.5763	1164.5775	-1.03	0	61	8.2e-005	1	U	R.LENEIQTYR.S
	559	601.3080	1200.6015	1200.6098	-6.92	0	55	0.00024	1	U	R.QSVEADINGLR.R
	681	691.3260	1380.6374	1380.6408	-2.47	0	73	4.4e-006	1	U	R.ALEESNYELEGK.I
	689	695.8448	1389.6750	1389.6736	1.06	0	94	4.5e-008	1	U	K.QSLEASLAETEGR.Y
	Proteins matching the same set of peptides:
	F6SQQ0 Mass: 42063 Score: 320 Matches: 9(9) Sequences: 9(9)
	Uncharacterized protein OS=Equus caballus OX=9796 PE=3 SV=1
	F6SS14 Mass: 49929 Score: 320 Matches: 9(9) Sequences: 9(9)
	Uncharacterized protein OS=Equus caballus OX=9796 PE=3 SV=1
	F6WDW3 Mass: 42694 Score: 320 Matches: 9(9) Sequences: 9(9)
	Uncharacterized protein OS=Equus caballus OX=9796 PE=3 SV=1
3.	F7B7X0 Mass: 66053 Score: 144 Matches: 5(3) Sequences: 5(3) emPAI: 0.27
	Keratin 1 OS=Equus caballus OX=9796 GN=KRT1 PE=3 SV=1
	Query	Observed	Mr(expt)	Mr(calc)	ppm	Miss	Score	Expect	Rank	Unique	Peptide
	454	517.2643	1032.5141	1032.5087	5.24	0	42	0.0085	1	U	R.TLLEGEESR.M
	483	533.2619	1064.5093	1064.5138	-4.28	0	27	0.18	1	U	R.AQYEDIAQK.S
	585	633.3217	1264.6289	1264.6299	-0.82	0	66	2.4e-005	1	U	R.TNAENEFVTIK.K
	691	465.2476	1392.7209	1392.7249	-2.82	1	26	0.24	1	U	R.TNAENEFVTIKK.D
	717	738.3951	1474.7756	1474.7780	-1.61	0	71	8e-006	1		R.FLEQQNQVLQTK.W
4.	F6W1N4 Mass: 82952 Score: 110 Matches: 2(2) Sequences: 2(2) emPAI: 0.08
	Uncharacterized protein OS=Equus caballus OX=9796 GN=PIGR PE=4 SV=1
	Query	Observed	Mr(expt)	Mr(calc)	ppm	Miss	Score	Expect	Rank	Unique	Peptide
	422	496.2604	990.5063	990.5094	-3.20	0	59	0.00012	1	U	K.GTGSGALSSVR.A
	673	681.3320	1360.6494	1360.6470	1.75	0	79	1.5e-006	1	U	R.AAAAEDEIETSVR.K
5.	F6RDD3 Mass: 16129 Score: 92 Matches: 3(3) Sequences: 2(2) emPAI: 0.77
	Globin A1 OS=Equus caballus OX=9796 GN=HBB PE=3 SV=1
	Query	Observed	Mr(expt)	Mr(calc)	ppm	Miss	Score	Expect	Rank	Unique	Peptide
	586	633.4114	1264.8083	1264.8231	-11.67	0	49	2.7e-005	1	U	R.LLGNVLVVVLAR.H
	1001	1000.4694	1998.9242	1998.9146	4.80	0	(33)	0.052	1	U	R.FFDSFGDLSNPGAVMGNPK.V
	1003	1008.4656	2014.9167	2014.9095	3.58	0	40	0.0081	1	U	R.FFDSFGDLSNPGAVMGNPK.V
	Proteins matching the same set of peptides:
	P02062 Mass: 15998 Score: 92 Matches: 3(3) Sequences: 2(2)
	Hemoglobin subunit beta OS=Equus caballus OX=9796 GN=HBB PE=1 SV=1
6.	F6WGX6 Mass: 62957 Score: 85 Matches: 2(2) Sequences: 2(2) emPAI: 0.11
	Keratin 77 OS=Equus caballus OX=9796 GN=KRT77 PE=3 SV=1
	Query	Observed	Mr(expt)	Mr(calc)	ppm	Miss	Score	Expect	Rank	Unique	Peptide
	716	738.3788	1474.7430	1474.7416	0.95	0	40	0.011	1	U	K.WELLQQVDTSTR.T
	717	738.3951	1474.7756	1474.7780	-1.61	0	71	8e-006	1		R.FLEQQNQVLQTK.W
7.	F7AUX9 Mass: 25999 Score: 84 Matches: 1(1) Sequences: 1(1) emPAI: 0.13
	Pulmonary surfactant-associated protein A OS=Equus caballus OX=9796 GN=SFTPA1 PE=4 SV=1
	Query	Observed	Mr(expt)	Mr(calc)	ppm	Miss	Score	Expect	Rank	Unique	Peptide
	706	723.3909	1444.7672	1444.7773	-6.99	0	84	3.4e-007	1	U	K.SLEENAAIASLVTK.H
	Proteins matching the same set of peptides:
	Q95L88 Mass: 26031 Score: 84 Matches: 1(1) Sequences: 1(1)
	Pulmonary surfactant-associated protein A OS=Equus caballus OX=9796 GN=SFTPA1 PE=2 SV=1
8.	P02791 Mass: 19965 Score: 77 Matches: 2(1) Sequences: 2(1) emPAI: 0.37
	Ferritin light chain OS=Equus caballus OX=9796 GN=FTL PE=1 SV=4
	Query	Observed	Mr(expt)	Mr(calc)	ppm	Miss	Score	Expect	Rank	Unique	Peptide
	375	445.7757	889.5368	889.5385	-1.95	0	20	0.18	1	U	R.LVNLYLR.A
	720	740.8574	1479.7003	1479.6954	3.33	0	76	2.7e-006	1	U	R.QNYSTEVEAAVNR.L
9.	F6W7V0 Mass: 62397 Score: 75 Matches: 3(3) Sequences: 3(3) emPAI: 0.17
	Keratin 5 OS=Equus caballus OX=9796 GN=KRT5 PE=3 SV=1
	Query	Observed	Mr(expt)	Mr(calc)	ppm	Miss	Score	Expect	Rank	Unique	Peptide
	508	547.2692	1092.5239	1092.5199	3.62	0	37	0.021	1	U	K.AQYEEIANR.S
	557	597.7918	1193.5691	1193.5676	1.19	0	34	0.035	1	U	K.YEELQQTAGR.H
	613	651.8575	1301.7005	1301.7078	-5.60	0	59	0.00011	1		R.SLDLDSIIAEVK.A
10.	F6SHJ8 Mass: 61290 Score: 72 Matches: 2(1) Sequences: 2(1) emPAI: 0.11
	Uncharacterized protein OS=Equus caballus OX=9796 PE=3 SV=1
	Query	Observed	Mr(expt)	Mr(calc)	ppm	Miss	Score	Expect	Rank	Unique	Peptide
	566	604.8118	1207.6091	1207.6085	0.54	0	25	0.37	1	U	R.TAAENDFVTLK.K
	717	738.3951	1474.7756	1474.7780	-1.61	0	71	8e-006	1		R.FLEQQNQVLQTK.W
	Proteins matching the same set of peptides:
	F7A559 Mass: 62690 Score: 72 Matches: 2(1) Sequences: 2(1)
	Uncharacterized protein OS=Equus caballus OX=9796 PE=3 SV=1
	F7AAI4 Mass: 52384 Score: 72 Matches: 2(1) Sequences: 2(1)
	Uncharacterized protein OS=Equus caballus OX=9796 PE=3 SV=1
	F7AN17 Mass: 63335 Score: 72 Matches: 2(1) Sequences: 2(1)
	Uncharacterized protein OS=Equus caballus OX=9796 PE=3 SV=1
	F7BP93 Mass: 56773 Score: 72 Matches: 2(1) Sequences: 2(1)
	Uncharacterized protein OS=Equus caballus OX=9796 PE=3 SV=1
11.	F6ZND8 Mass: 59832 Score: 67 Matches: 2(1) Sequences: 2(1) emPAI: 0.11
	Uncharacterized protein OS=Equus caballus OX=9796 GN=KRT6C PE=3 SV=1
	Query	Observed	Mr(expt)	Mr(calc)	ppm	Miss	Score	Expect	Rank	Unique	Peptide
	562	602.3239	1202.6332	1202.6295	3.01	0	30	0.11	1	U	K.WTLLQEQGTK.T
	613	651.8575	1301.7005	1301.7078	-5.60	0	59	0.00011	1		R.SLDLDSIIAEVK.A
	Proteins matching the same set of peptides:
	F7AGY4 Mass: 60145 Score: 67 Matches: 2(1) Sequences: 2(1)
	Uncharacterized protein OS=Equus caballus OX=9796 PE=3 SV=1
	F7D281 Mass: 59851 Score: 67 Matches: 2(1) Sequences: 2(1)
	Uncharacterized protein OS=Equus caballus OX=9796 GN=KRT6B PE=3 SV=1
12.	A0A0B4J1C4 Mass: 17841 Score: 66 Matches: 2(1) Sequences: 2(1) emPAI: 0.19
	Joining chain of multimeric IgA and IgM OS=Equus caballus OX=9796 GN=JCHAIN PE=4 SV=1
	Query	Observed	Mr(expt)	Mr(calc)	ppm	Miss	Score	Expect	Rank	Unique	Peptide
	391	456.2867	910.5588	910.5600	-1.28	0	14	0.39	1	U	R.IIIPVNSR.E
	480	532.2925	1062.5704	1062.5710	-0.53	0	66	2e-005	1	U	R.VPLTYGGQTK.I
13.	F6T323 Mass: 27112 Score: 65 Matches: 1(1) Sequences: 1(1) emPAI: 0.12
	Uncharacterized protein OS=Equus caballus OX=9796 GN=LOC100055297 PE=3 SV=1
	Query	Observed	Mr(expt)	Mr(calc)	ppm	Miss	Score	Expect	Rank	Unique	Peptide
	1026	746.3772	2236.1098	2236.1011	3.86	0	65	3.3e-005	1	U	R.LGEYNIEVVEGNEQFINAAK.I
14.	P01958 Mass: 15236 Score: 58 Matches: 2(1) Sequences: 2(1) emPAI: 0.50
	Hemoglobin subunit alpha OS=Equus caballus OX=9796 GN=HBA PE=1 SV=2
	Query	Observed	Mr(expt)	Mr(calc)	ppm	Miss	Score	Expect	Rank	Unique	Peptide
	475	529.2676	1056.5207	1056.5314	-10.12	0	23	0.34	1	U	R.MFLGFPTTK.T
	938	611.9692	1832.8859	1832.8846	0.70	0	51	0.001	1	U	K.TYFPHFDLSHGSAQVK.A
15.	F6QAU5 Mass: 11433 Score: 39 Matches: 1(1) Sequences: 1(1) emPAI: 0.30
	Uncharacterized protein OS=Equus caballus OX=9796 PE=4 SV=1
	Query	Observed	Mr(expt)	Mr(calc)	ppm	Miss	Score	Expect	Rank	Unique	Peptide
	450	516.2622	1030.5099	1030.5083	1.49	0	39	0.013	1	U	K.YAASSYLTR.T
	Proteins matching the same set of peptides:
	F6SQD7 Mass: 11220 Score: 39 Matches: 1(1) Sequences: 1(1)
	Uncharacterized protein OS=Equus caballus OX=9796 PE=4 SV=1
	F7CAC5 Mass: 12224 Score: 39 Matches: 1(1) Sequences: 1(1)
	Uncharacterized protein OS=Equus caballus OX=9796 PE=4 SV=1
16.	F6QDH8 Mass: 57316 Score: 39 Matches: 1(1) Sequences: 1(1) emPAI: 0.06
	Alpha-amylase OS=Equus caballus OX=9796 GN=LOC100051073 PE=3 SV=1
	Query	Observed	Mr(expt)	Mr(calc)	ppm	Miss	Score	Expect	Rank	Unique	Peptide
	736	769.8226	1537.6306	1537.6409	-6.68	0	39	0.0034	1	U	K.NWGEGWGFMPSDR.A
	Proteins matching the same set of peptides:
	F7DYB1 Mass: 57329 Score: 39 Matches: 1(1) Sequences: 1(1)
	Alpha-amylase OS=Equus caballus OX=9796 GN=LOC100049851 PE=3 SV=1
17.	F7DMT7 Score: 36 Matches: 2(2) Sequences: 1(1) emPAI: 0.06
	Importin subunit alpha OS=Equus caballus OX=9796 GN=KPNA5 PE=3 SV=1
	Query	Observed	Mr(expt)	Mr(calc)	ppm	Miss	Score	Expect	Rank	Unique	Peptide
	334	421.7601	841.5057	840.4930	1205	1	32	0.021	1	U	R.RNVSLPR.N 333
18.	F6WIP4 Mass: 19373 Score: 34 Matches: 1(1) Sequences: 1(1) emPAI: 0.17
	Lipocalin 1 OS=Equus caballus OX=9796 GN=LCN1 PE=3 SV=1
	Query	Observed	Mr(expt)	Mr(calc)	ppm	Miss	Score	Expect	Rank	Unique	Peptide
	708	725.8256	1449.6367	1449.6372	-0.33	0	34	0.023	1	U	R.DAENNQGALEDFK.T
19.	F7CM17 Mass: 39845 Score: 24 Matches: 1(0) Sequences: 1(0) emPAI: 0.08
	Pentatricopeptide repeat domain 2 OS=Equus caballus OX=9796 GN=PTCD2 PE=4 SV=1
	Query	Observed	Mr(expt)	Mr(calc)	ppm	Miss	Score	Expect	Rank	Unique	Peptide
	460	519.2982	1036.5819	1036.5805	1.37	0	24	0.14	1	U	R.YLLTDSVVK.L
Mascot: http://www.matrixscience.com/

## Sheet: Band 5
Mascot Search Results
Search title : Uniprot_Horse_25ppm-05Da
MS data file : 56294995342143272.mgf
Database : Uniprot-Horse UP000002281-25-02-2019 (22705 sequences; 12757064 residues)
Timestamp : 5 Apr 2019 at 17:02:24 GMT
Enzyme : Trypsin
Variable modifications : Carbamidomethyl (C),Deamidated (NQ),Oxidation (M)
Mass values : Monoisotopic
Protein Mass : Unrestricted
Peptide Mass Tolerance : ± 25 ppm (# 13C = 1)
Fragment Mass Tolerance: ± 0.06 Da
Max Missed Cleavages : 1
Instrument type : ESI-QUAD-TOF
Number of queries : 1286
Protein hits :	F6RDD3	Globin A1 OS=Equus caballus OX=9796 GN=HBB PE=3 SV=1
	P01958	Hemoglobin subunit alpha OS=Equus caballus OX=9796 GN=HBA PE=1 SV=2
	F6SJK9	Uncharacterized protein OS=Equus caballus OX=9796 PE=3 SV=1
	F6ZBG0	Carbonic anhydrase 1 OS=Equus caballus OX=9796 GN=CA1 PE=4 SV=1
	F7B7X0	Keratin 1 OS=Equus caballus OX=9796 GN=KRT1 PE=3 SV=1
	F6XA04	Tyrosine 3-monooxygenase/tryptophan 5-monooxygenase activation protein epsilon OS=Equus caballus OX=9796 GN=YWHAE PE=3 SV=1
	F6SHJ8	Uncharacterized protein OS=Equus caballus OX=9796 PE=3 SV=1
	F6QDH8	Alpha-amylase OS=Equus caballus OX=9796 GN=LOC100051073 PE=3 SV=1
	F7BAY6	Serum albumin OS=Equus caballus OX=9796 GN=ALB PE=4 SV=1
	F6WGX6	Keratin 77 OS=Equus caballus OX=9796 GN=KRT77 PE=3 SV=1
	F6X1X3	Vitelline membrane outer layer 1 homolog OS=Equus caballus OX=9796 GN=VMO1 PE=4 SV=1
	H9GZQ9	Uncharacterized protein OS=Equus caballus OX=9796 PE=4 SV=1
	F6YS25	Carbonic anhydrase 2 OS=Equus caballus OX=9796 GN=CA2 PE=4 SV=1
	Q2TU62	Calcium-activated chloride channel regulator 1 OS=Equus caballus OX=9796 GN=CLCA1 PE=1 SV=1
	F6W7V0	Keratin 5 OS=Equus caballus OX=9796 GN=KRT5 PE=3 SV=1
	F7CPJ5	Uncharacterized protein OS=Equus caballus OX=9796 GN=LOC100053601 PE=3 SV=1
	F6T323	Uncharacterized protein OS=Equus caballus OX=9796 GN=LOC100055297 PE=3 SV=1
	F7AUX9	Pulmonary surfactant-associated protein A OS=Equus caballus OX=9796 GN=SFTPA1 PE=4 SV=1
	F6ZEQ3	Keratin 16 OS=Equus caballus OX=9796 GN=KRT16 PE=3 SV=1
	H9GZT5	Uncharacterized protein OS=Equus caballus OX=9796 PE=4 SV=1
	F6ZND8	Uncharacterized protein OS=Equus caballus OX=9796 GN=KRT6C PE=3 SV=1
	F6ZBW3	Tropomyosin alpha-4 chain OS=Equus caballus OX=9796 GN=TPM4 PE=3 SV=1
	F6ZHQ5	Chloride intracellular channel protein OS=Equus caballus OX=9796 GN=CLIC1 PE=3 SV=1
	F6QAU5	Uncharacterized protein OS=Equus caballus OX=9796 PE=4 SV=1
	F6W1N4	Uncharacterized protein OS=Equus caballus OX=9796 GN=PIGR PE=4 SV=1
	F7DMT7	Importin subunit alpha OS=Equus caballus OX=9796 GN=KPNA5 PE=3 SV=1
	A0A0B4J1C4	Joining chain of multimeric IgA and IgM OS=Equus caballus OX=9796 GN=JCHAIN PE=4 SV=1
	F6W039	Rho GDP dissociation inhibitor alpha OS=Equus caballus OX=9796 GN=ARHGDIA PE=4 SV=1
	F6V5H1	Immunoglobulin kappa constant OS=Equus caballus OX=9796 GN=IGKC PE=4 SV=1
	F6R1I4	Uteroglobin OS=Equus caballus OX=9796 GN=SCGB1A1 PE=4 SV=1
	H9GZV1	Uncharacterized protein OS=Equus caballus OX=9796 PE=4 SV=1
	F7CEG0	BBX, HMG-box containing OS=Equus caballus OX=9796 GN=BBX PE=4 SV=1
	F7BLE3	Uncharacterized protein OS=Equus caballus OX=9796 PE=4 SV=1
	F6QDV6	Tubulin tyrosine ligase like 1 OS=Equus caballus OX=9796 GN=TTLL1 PE=4 SV=1
	F6U4X2	Alpha-fetoprotein OS=Equus caballus OX=9796 GN=AFP PE=4 SV=1
Select Summary Report
			Help
	Significance threshold p<	Max. number of hits
	Standard scoring MudPIT scoring	Ions score or expect cut-off	Show sub-sets
	Show pop-ups Suppress pop-ups		Require bold red
	Preferred taxonomy
All queries Unassigned Below homology threshold Below identity threshold
1.	F6RDD3 Mass: 16129 Score: 1104 Matches: 27(26) Sequences: 11(11) emPAI: 30.19
	Globin A1 OS=Equus caballus OX=9796 GN=HBB PE=3 SV=1
	Query	Observed	Mr(expt)	Mr(calc)	ppm	Miss	Score	Expect	Rank	Unique	Peptide
	441	493.7868	985.5590	985.5596	-0.66	0	56	0.00019	1	U	K.AAVLALWDK.V
	612	564.2788	1126.5431	1126.5407	2.09	0	32	0.044	1	U	K.LHVDPENFR.L
	632	383.8969	1148.6689	1148.6666	2.03	0	(44)	0.00085	1	U	K.VVAGVANALAHK.Y
	633	575.3428	1148.6711	1148.6666	3.95	0	87	4.4e-008	1	U	K.VVAGVANALAHK.Y
	634	384.2236	1149.6490	1149.6506	-1.40	0	(71)	2.9e-006	1	U	K.VVAGVANALAHK.Y 636
	635	575.8326	1149.6506	1149.6506	0.02	0	(83)	1.7e-007	1	U	K.VVAGVANALAHK.Y
	742	633.4158	1264.8170	1264.8231	-4.82	0	56	4.5e-006	1	U	R.LLGNVLVVVLAR.H
	747	637.8621	1273.7097	1273.7183	-6.75	0	65	1.8e-005	1	U	R.LLVVYPWTQR.F
	846	679.8345	1357.6544	1357.6474	5.19	0	79	1.1e-006	1	U	K.VNEEEVGGEALGR.L 847 852
	851	680.3242	1358.6339	1358.6314	1.86	0	(46)	0.0018	1	U	K.VNEEEVGGEALGR.L
	905	713.8491	1425.6837	1425.6776	4.27	0	71	7.6e-006	1	U	K.DFTPELQASYQK.V 902 903 904
	907	714.3311	1426.6476	1426.6616	-9.85	0	(55)	0.00026	1	U	K.DFTPELQASYQK.V
	908	714.3408	1426.6671	1426.6616	3.84	0	(57)	0.00018	1	U	K.DFTPELQASYQK.V
	1137	451.2393	1800.9282	1800.9271	0.58	0	70	9.1e-006	1	U	K.VLHSFGEGVHHLDNLK.G
	1138	601.3174	1800.9305	1800.9271	1.88	0	(40)	0.0093	1	U	K.VLHSFGEGVHHLDNLK.G 1134
	1170	632.6454	1894.9143	1894.9214	-3.71	1	47	0.002	1	U	R.HFGKDFTPELQASYQK.V
	1204	1000.4599	1998.9052	1998.9146	-4.67	0	(28)	0.16	1	U	R.FFDSFGDLSNPGAVMGNPK.V
	1205	1008.4518	2014.8891	2014.9095	-10.11	0	103	3.3e-009	1	U	R.FFDSFGDLSNPGAVMGNPK.V 1206
	1261	776.0613	2325.1620	2325.1964	-14.81	1	110	1e-009	1	U	K.AAVLALWDKVNEEEVGGEALGR.L
	Proteins matching the same set of peptides:
	P02062 Mass: 15998 Score: 1104 Matches: 27(26) Sequences: 11(11)
	Hemoglobin subunit beta OS=Equus caballus OX=9796 GN=HBB PE=1 SV=1
2.	P01958 Mass: 15236 Score: 359 Matches: 12(10) Sequences: 5(5) emPAI: 6.51
	Hemoglobin subunit alpha OS=Equus caballus OX=9796 GN=HBA PE=1 SV=2
	Query	Observed	Mr(expt)	Mr(calc)	ppm	Miss	Score	Expect	Rank	Unique	Peptide
	511	521.2714	1040.5282	1040.5365	-8.00	0	(44)	0.0024	1	U	R.MFLGFPTTK.T
	534	529.2720	1056.5294	1056.5314	-1.92	0	53	0.00028	1	U	R.MFLGFPTTK.T 535
	575	544.3162	1086.6179	1086.6186	-0.63	1	42	0.0046	1	U	K.LRVDPVNFK.L
	626	573.3298	1144.6450	1144.6452	-0.16	1	(46)	0.0017	1	U	M.VLSAADKTNVK.A
	627	573.8206	1145.6266	1145.6292	-2.29	1	63	4.5e-005	1	U	M.VLSAADKTNVK.A
	628	382.8838	1145.6296	1145.6292	0.39	1	(32)	0.049	1	U	M.VLSAADKTNVK.A
	744	634.8570	1267.6994	1267.7024	-2.32	0	71	3e-006	1	U	K.FLSSVSTVLTSK.Y
	1148	459.2280	1832.8830	1832.8846	-0.87	0	(26)	0.32	1	U	K.TYFPHFDLSHGSAQVK.A
	1149	611.9684	1832.8833	1832.8846	-0.70	0	64	4.6e-005	1	U	K.TYFPHFDLSHGSAQVK.A 1147
	1150	917.4502	1832.8858	1832.8846	0.68	0	(31)	0.097	1	U	K.TYFPHFDLSHGSAQVK.A
3.	F6SJK9 Mass: 39128 Score: 295 Matches: 13(10) Sequences: 13(10) emPAI: 1.65
	Uncharacterized protein OS=Equus caballus OX=9796 PE=3 SV=1
	Query	Observed	Mr(expt)	Mr(calc)	ppm	Miss	Score	Expect	Rank	Unique	Peptide
	297	404.2034	806.3922	806.3923	-0.09	0	44	0.0045	1		R.LAADDFR.L
	300	405.2241	808.4336	808.4330	0.72	0	30	0.049	1		R.LASYLDK.V
	454	498.2605	994.5064	994.5123	-5.93	1	22	0.46	1	U	K.IKEWYEK.H
	490	516.2977	1030.5808	1030.5910	-9.93	0	40	0.0084	1	U	R.VLDELTLTK.A
	578	545.7693	1089.5240	1089.5237	0.31	0	49	0.0013	1	U	K.VTMQNLNDR.L
	591	555.2510	1108.4874	1108.4825	4.41	0	42	0.0045	1	U	K.DAEAWFNEK.S
	649	583.2983	1164.5820	1164.5775	3.90	0	55	0.00028	1	U	R.LENEIQTYR.S
	665	594.3463	1186.6780	1186.6921	-11.94	1	29	0.066	1	U	R.RVLDELTLTK.A
	683	601.3126	1200.6107	1200.6098	0.70	0	34	0.032	1		R.QSVEADINGLR.R
	844	679.3580	1356.7014	1356.7110	-7.05	1	26	0.19	1		R.QSVEADINGLRR.V
	860	691.3292	1380.6439	1380.6408	2.21	0	78	1.6e-006	1	U	R.ALEESNYELEGK.I
	869	695.8391	1389.6635	1389.6736	-7.20	0	84	3.8e-007	1	U	K.QSLEASLAETEGR.Y
	914	717.8862	1433.7579	1433.7626	-3.30	1	51	0.00069	1	U	K.IRLENEIQTYR.S
	Proteins matching the same set of peptides:
	F6SQQ0 Mass: 42063 Score: 295 Matches: 13(10) Sequences: 13(10)
	Uncharacterized protein OS=Equus caballus OX=9796 PE=3 SV=1
	F6SS14 Mass: 49929 Score: 295 Matches: 13(10) Sequences: 13(10)
	Uncharacterized protein OS=Equus caballus OX=9796 PE=3 SV=1
	F6WDW3 Mass: 42694 Score: 295 Matches: 13(10) Sequences: 13(10)
	Uncharacterized protein OS=Equus caballus OX=9796 PE=3 SV=1
4.	F6ZBG0 Mass: 28980 Score: 197 Matches: 6(5) Sequences: 6(5) emPAI: 0.92
	Carbonic anhydrase 1 OS=Equus caballus OX=9796 GN=CA1 PE=4 SV=1
	Query	Observed	Mr(expt)	Mr(calc)	ppm	Miss	Score	Expect	Rank	Unique	Peptide
	459	500.7860	999.5573	999.5600	-2.70	0	46	0.0017	1	U	K.VLDALNEVK.T
	466	502.2761	1002.5377	1002.5346	3.13	0	72	8.8e-006	1	U	R.SLLSNVEGGK.A
	839	678.8652	1355.7158	1355.7198	-2.92	0	49	0.00098	1	U	K.EIVNVGHSFQVK.F
	1052	811.4111	1620.8076	1620.8107	-1.93	0	84	5e-007	1	U	K.ENISISSEQLAQFR.S
	1076	557.9373	1670.7899	1670.8052	-9.16	0	24	0.41	1	U	K.YSAELHLVHWNSSK.Y
	1112	879.4599	1756.9052	1756.8995	3.26	0	52	0.00048	1	U	K.LYPIANGNNQSPIDIK.T
5.	F7B7X0 Mass: 66053 Score: 172 Matches: 4(4) Sequences: 4(4) emPAI: 0.21
	Keratin 1 OS=Equus caballus OX=9796 GN=KRT1 PE=3 SV=1
	Query	Observed	Mr(expt)	Mr(calc)	ppm	Miss	Score	Expect	Rank	Unique	Peptide
	497	517.2618	1032.5090	1032.5087	0.27	0	73	6.7e-006	1	U	R.TLLEGEESR.M
	544	533.2618	1064.5091	1064.5138	-4.40	0	41	0.0073	1	U	R.AQYEDIAQK.S
	741	633.3181	1264.6216	1264.6299	-6.61	0	61	8.6e-005	1	U	R.TNAENEFVTIK.K
	948	738.3955	1474.7765	1474.7780	-1.03	0	75	3.4e-006	1		R.FLEQQNQVLQTK.W
6.	F6XA04 Mass: 26487 Score: 169 Matches: 4(4) Sequences: 4(4) emPAI: 0.61
	Tyrosine 3-monooxygenase/tryptophan 5-monooxygenase activation protein epsilon OS=Equus caballus OX=9796 GN=YWHAE PE=3 SV=1
	Query	Observed	Mr(expt)	Mr(calc)	ppm	Miss	Score	Expect	Rank	Unique	Peptide
	679	597.8027	1193.5909	1193.5928	-1.56	0	89	1.4e-007	1	U	K.EAAENSLVAYK.A
	720	619.3261	1236.6377	1236.6462	-6.92	0	62	4.6e-005	1	U	K.HLIPAANTGESK.V
	736	628.7935	1255.5724	1255.5833	-8.71	0	36	0.017	1	U	R.YLAEFATGNDR.K
	937	732.3531	1462.6917	1462.6974	-3.84	0	41	0.009	1	U	K.VAGMDVELTVEER.N
7.	F6SHJ8 Mass: 61290 Score: 164 Matches: 4(3) Sequences: 4(3) emPAI: 0.23
	Uncharacterized protein OS=Equus caballus OX=9796 PE=3 SV=1
	Query	Observed	Mr(expt)	Mr(calc)	ppm	Miss	Score	Expect	Rank	Unique	Peptide
	311	414.2170	826.4194	826.4225	-3.74	0	26	0.11	1		K.FASFIDK.V
	694	604.8096	1207.6047	1207.6085	-3.10	0	82	6.1e-007	1	U	R.TAAENDFVTLK.K
	827	668.8515	1335.6884	1335.7034	-11.20	1	61	8e-005	1	U	R.TAAENDFVTLKK.D
	948	738.3955	1474.7765	1474.7780	-1.03	0	75	3.4e-006	1		R.FLEQQNQVLQTK.W
	Proteins matching the same set of peptides:
	F7A559 Mass: 62690 Score: 164 Matches: 4(3) Sequences: 4(3)
	Uncharacterized protein OS=Equus caballus OX=9796 PE=3 SV=1
	F7AAI4 Mass: 52384 Score: 164 Matches: 4(3) Sequences: 4(3)
	Uncharacterized protein OS=Equus caballus OX=9796 PE=3 SV=1
	F7AN17 Mass: 63335 Score: 164 Matches: 4(3) Sequences: 4(3)
	Uncharacterized protein OS=Equus caballus OX=9796 PE=3 SV=1
	F7BP93 Mass: 56773 Score: 164 Matches: 4(3) Sequences: 4(3)
	Uncharacterized protein OS=Equus caballus OX=9796 PE=3 SV=1
8.	F6QDH8 Mass: 57316 Score: 145 Matches: 4(3) Sequences: 4(3) emPAI: 0.25
	Alpha-amylase OS=Equus caballus OX=9796 GN=LOC100051073 PE=3 SV=1
	Query	Observed	Mr(expt)	Mr(calc)	ppm	Miss	Score	Expect	Rank	Unique	Peptide
	374	449.7386	897.4627	897.4596	3.44	0	20	0.46	1	U	R.YQPISYK.L
	655	585.3558	1168.6970	1168.7067	-8.31	0	67	4.1e-006	1	U	R.VVGLLDLALEK.D
	909	714.3549	1426.6952	1426.6953	-0.11	0	71	6.2e-006	1	U	R.ALVFVDNHDNQR.G
	1106	577.2751	1728.8036	1728.8116	-4.64	0	36	0.026	1	U	K.MAVGFMLAHPYGFTR.I
	Proteins matching the same set of peptides:
	F7DYB1 Mass: 57329 Score: 145 Matches: 4(3) Sequences: 4(3)
	Alpha-amylase OS=Equus caballus OX=9796 GN=LOC100049851 PE=3 SV=1
9.	F7BAY6 Mass: 68328 Score: 120 Matches: 5(3) Sequences: 5(3) emPAI: 0.26
	Serum albumin OS=Equus caballus OX=9796 GN=ALB PE=4 SV=1
	Query	Observed	Mr(expt)	Mr(calc)	ppm	Miss	Score	Expect	Rank	Unique	Peptide
	288	395.2397	788.4649	788.4644	0.72	0	27	0.17	1	U	K.IVTDLTK.V
	386	457.2389	912.4633	912.4705	-7.89	0	26	0.15	1	U	K.YLYEVAR.R
	631	575.3123	1148.6101	1148.6077	2.05	0	46	0.0024	1	U	K.LVNEVTEFAK.K
	943	734.4107	1466.8069	1466.8093	-1.66	0	54	0.00015	1	U	K.APQVSTPTLVEIGR.T
	1041	532.6404	1594.8993	1594.9043	-3.09	1	35	0.0068	1	U	K.KAPQVSTPTLVEIGR.T
	Proteins matching the same set of peptides:
	P35747 Mass: 68554 Score: 120 Matches: 5(3) Sequences: 5(3)
	Serum albumin OS=Equus caballus OX=9796 GN=ALB PE=1 SV=1
10.	F6WGX6 Mass: 62957 Score: 107 Matches: 3(2) Sequences: 3(2) emPAI: 0.17
	Keratin 77 OS=Equus caballus OX=9796 GN=KRT77 PE=3 SV=1
	Query	Observed	Mr(expt)	Mr(calc)	ppm	Miss	Score	Expect	Rank	Unique	Peptide
	311	414.2170	826.4194	826.4225	-3.74	0	26	0.11	1		K.FASFIDK.V
	947	738.3798	1474.7450	1474.7416	2.28	0	65	4e-005	1	U	K.WELLQQVDTSTR.T
	948	738.3955	1474.7765	1474.7780	-1.03	0	75	3.4e-006	1		R.FLEQQNQVLQTK.W
11.	F6X1X3 Mass: 21514 Score: 107 Matches: 2(2) Sequences: 1(1) emPAI: 0.34
	Vitelline membrane outer layer 1 homolog OS=Equus caballus OX=9796 GN=VMO1 PE=4 SV=1
	Query	Observed	Mr(expt)	Mr(calc)	ppm	Miss	Score	Expect	Rank	Unique	Peptide
	1089	566.9361	1697.7865	1697.7969	-6.13	0	69	1.2e-005	1	U	R.GNAELNTHVVESESGR.W
	1090	849.9029	1697.7912	1697.7969	-3.32	0	(54)	0.0004	1	U	R.GNAELNTHVVESESGR.W
12.	H9GZQ9 Mass: 37414 Score: 104 Matches: 2(2) Sequences: 2(2) emPAI: 0.18
	Uncharacterized protein OS=Equus caballus OX=9796 PE=4 SV=1
	Query	Observed	Mr(expt)	Mr(calc)	ppm	Miss	Score	Expect	Rank	Unique	Peptide
	859	689.8759	1377.7373	1377.7364	0.61	0	57	0.00014	1	U	K.VNNQALPQPIER.T
	1224	1094.9865	2187.9583	2187.9597	-0.60	0	63	3.5e-005	1	U	K.YSTTQAQQDSDGSYFLYSK.L
13.	F6YS25 Mass: 29171 Score: 103 Matches: 3(3) Sequences: 3(3) emPAI: 0.38
	Carbonic anhydrase 2 OS=Equus caballus OX=9796 GN=CA2 PE=4 SV=1
	Query	Observed	Mr(expt)	Mr(calc)	ppm	Miss	Score	Expect	Rank	Unique	Peptide
	653	585.2603	1168.5060	1168.5149	-7.66	0	31	0.04	1	U	K.SADFTNFDPR.G
	819	665.3638	1328.7131	1328.7187	-4.22	0	53	0.00041	1	U	R.EPISVSSEQLLK.F
	822	666.8602	1331.7058	1331.7198	-10.49	0	55	0.00028	1	U	K.AVLQGGPLTGTYR.L
14.	Q2TU62 Mass: 100072 Score: 99 Matches: 3(2) Sequences: 3(2) emPAI: 0.07
	Calcium-activated chloride channel regulator 1 OS=Equus caballus OX=9796 GN=CLCA1 PE=1 SV=1
	Query	Observed	Mr(expt)	Mr(calc)	ppm	Miss	Score	Expect	Rank	Unique	Peptide
	597	557.3114	1112.6083	1112.6091	-0.74	0	40	0.0049	1	U	K.VWALGGVNAAR.Q
	680	597.8128	1193.6111	1193.6114	-0.32	0	23	0.49	1	U	K.MAYLQVPGTAK.V
	838	676.3447	1350.6748	1350.6780	-2.36	1	82	7.7e-007	1	U	K.KQDGFVVDTNTK.M
15.	F6W7V0 Mass: 62397 Score: 95 Matches: 4(3) Sequences: 4(3) emPAI: 0.23
	Keratin 5 OS=Equus caballus OX=9796 GN=KRT5 PE=3 SV=1
	Query	Observed	Mr(expt)	Mr(calc)	ppm	Miss	Score	Expect	Rank	Unique	Peptide
	311	414.2170	826.4194	826.4225	-3.74	0	26	0.11	1		K.FASFIDK.V
	678	597.7914	1193.5683	1193.5676	0.58	0	59	0.00012	1	U	K.YEELQQTAGR.H
	775	649.8173	1297.6200	1297.6224	-1.87	0	32	0.052	1	U	R.TTAENEFVMLK.K
	784	651.8575	1301.7004	1301.7078	-5.69	0	54	0.00038	1		R.SLDLDSIIAEVK.A
16.	F7CPJ5 Mass: 21557 Score: 86 Matches: 2(2) Sequences: 2(2) emPAI: 0.34
	Uncharacterized protein OS=Equus caballus OX=9796 GN=LOC100053601 PE=3 SV=1
	Query	Observed	Mr(expt)	Mr(calc)	ppm	Miss	Score	Expect	Rank	Unique	Peptide
	807	659.3358	1316.6571	1316.6572	-0.09	0	50	0.0011	1	U	K.ENIIDLTQTDR.C
	1069	549.2820	1644.8241	1644.8246	-0.32	1	57	0.00023	1	U	R.EPDVSPEIKEEFVK.I
17.	F6T323 Mass: 27112 Score: 86 Matches: 2(2) Sequences: 1(1) emPAI: 0.26
	Uncharacterized protein OS=Equus caballus OX=9796 GN=LOC100055297 PE=3 SV=1
	Query	Observed	Mr(expt)	Mr(calc)	ppm	Miss	Score	Expect	Rank	Unique	Peptide
	1235	1119.0596	2236.1046	2236.1011	1.54	0	54	0.00042	1	U	R.LGEYNIEVVEGNEQFINAAK.I
	1236	746.3757	2236.1054	2236.1011	1.89	0	(52)	0.00072	1	U	R.LGEYNIEVVEGNEQFINAAK.I
18.	F7AUX9 Mass: 25999 Score: 84 Matches: 1(1) Sequences: 1(1) emPAI: 0.13
	Pulmonary surfactant-associated protein A OS=Equus caballus OX=9796 GN=SFTPA1 PE=4 SV=1
	Query	Observed	Mr(expt)	Mr(calc)	ppm	Miss	Score	Expect	Rank	Unique	Peptide
	923	723.3994	1444.7842	1444.7773	4.76	0	84	2.7e-007	1	U	K.SLEENAAIASLVTK.H
	Proteins matching the same set of peptides:
	Q95L88 Mass: 26031 Score: 84 Matches: 1(1) Sequences: 1(1)
	Pulmonary surfactant-associated protein A OS=Equus caballus OX=9796 GN=SFTPA1 PE=2 SV=1
19.	F6ZEQ3 Mass: 50796 Score: 75 Matches: 5(4) Sequences: 5(4) emPAI: 0.37
	Keratin 16 OS=Equus caballus OX=9796 GN=KRT16 PE=3 SV=1
	Query	Observed	Mr(expt)	Mr(calc)	ppm	Miss	Score	Expect	Rank	Unique	Peptide
	297	404.2034	806.3922	806.3923	-0.09	0	44	0.0045	1		R.LAADDFR.T
	300	405.2241	808.4336	808.4330	0.72	0	30	0.049	1		R.LASYLDK.V
	488	515.2993	1028.5841	1028.5866	-2.44	0	35	0.023	1	U	R.VLDELTLAR.T
	683	601.3126	1200.6107	1200.6098	0.70	0	34	0.032	1		R.QSVEADINGLR.R
	844	679.3580	1356.7014	1356.7110	-7.05	1	26	0.19	1		R.QSVEADINGLRR.V
20.	H9GZT5 Mass: 36409 Score: 75 Matches: 2(2) Sequences: 2(2) emPAI: 0.19
	Uncharacterized protein OS=Equus caballus OX=9796 PE=4 SV=1
	Query	Observed	Mr(expt)	Mr(calc)	ppm	Miss	Score	Expect	Rank	Unique	Peptide
	590	554.3429	1106.6712	1106.6812	-8.97	0	35	0.0028	1	U	R.VVSILAIQHK.D
	1168	627.6689	1879.9850	1879.9792	3.10	1	56	0.00017	1	U	R.EPQVYVLAPHRDELSK.N
21.	F6ZND8 Mass: 59832 Score: 70 Matches: 3(2) Sequences: 3(2) emPAI: 0.17
	Uncharacterized protein OS=Equus caballus OX=9796 GN=KRT6C PE=3 SV=1
	Query	Observed	Mr(expt)	Mr(calc)	ppm	Miss	Score	Expect	Rank	Unique	Peptide
	311	414.2170	826.4194	826.4225	-3.74	0	26	0.11	1		K.FASFIDK.V
	589	554.2789	1106.5432	1106.5356	6.86	0	42	0.0089	1	U	K.AQYEEIAQR.S
	784	651.8575	1301.7004	1301.7078	-5.69	0	54	0.00038	1		R.SLDLDSIIAEVK.A
	Proteins matching the same set of peptides:
	F7AGY4 Mass: 60145 Score: 70 Matches: 3(2) Sequences: 3(2)
	Uncharacterized protein OS=Equus caballus OX=9796 PE=3 SV=1
	F7D281 Mass: 59851 Score: 70 Matches: 3(2) Sequences: 3(2)
	Uncharacterized protein OS=Equus caballus OX=9796 GN=KRT6B PE=3 SV=1
22.	F6ZBW3 Mass: 23588 Score: 49 Matches: 1(1) Sequences: 1(1) emPAI: 0.14
	Tropomyosin alpha-4 chain OS=Equus caballus OX=9796 GN=TPM4 PE=3 SV=1
	Query	Observed	Mr(expt)	Mr(calc)	ppm	Miss	Score	Expect	Rank	Unique	Peptide
	723	622.3257	1242.6368	1242.6456	-7.03	0	49	0.00085	1	U	R.IQLVEEELDR.A
	Proteins matching the same set of peptides:
	F6ZTR4 Mass: 32930 Score: 49 Matches: 1(1) Sequences: 1(1)
	Tropomyosin 3 OS=Equus caballus OX=9796 GN=TPM3 PE=3 SV=1
	F7A281 Mass: 32956 Score: 49 Matches: 1(1) Sequences: 1(1)
	Tropomyosin 2 OS=Equus caballus OX=9796 GN=TPM2 PE=3 SV=1
	F7CS04 Mass: 28876 Score: 49 Matches: 1(1) Sequences: 1(1)
	Tropomyosin 1 OS=Equus caballus OX=9796 GN=TPM1 PE=3 SV=1
	P02561 Mass: 28505 Score: 49 Matches: 1(1) Sequences: 1(1)
	Tropomyosin alpha-4 chain OS=Equus caballus OX=9796 GN=TPM4 PE=1 SV=2
23.	F6ZHQ5 Mass: 26975 Score: 45 Matches: 1(1) Sequences: 1(1) emPAI: 0.12
	Chloride intracellular channel protein OS=Equus caballus OX=9796 GN=CLIC1 PE=3 SV=1
	Query	Observed	Mr(expt)	Mr(calc)	ppm	Miss	Score	Expect	Rank	Unique	Peptide
	753	641.3329	1280.6513	1280.6613	-7.75	0	45	0.0026	1	U	K.GVTFNVTTVDTK.R
24.	F6QAU5 Mass: 11433 Score: 45 Matches: 1(1) Sequences: 1(1) emPAI: 0.30
	Uncharacterized protein OS=Equus caballus OX=9796 PE=4 SV=1
	Query	Observed	Mr(expt)	Mr(calc)	ppm	Miss	Score	Expect	Rank	Unique	Peptide
	489	516.2631	1030.5116	1030.5083	3.15	0	45	0.0038	1	U	K.YAASSYLTR.T
	Proteins matching the same set of peptides:
	F6SQD7 Mass: 11220 Score: 45 Matches: 1(1) Sequences: 1(1)
	Uncharacterized protein OS=Equus caballus OX=9796 PE=4 SV=1
	F7CAC5 Mass: 12224 Score: 45 Matches: 1(1) Sequences: 1(1)
	Uncharacterized protein OS=Equus caballus OX=9796 PE=4 SV=1
25.	F6W1N4 Mass: 82952 Score: 44 Matches: 1(1) Sequences: 1(1) emPAI: 0.04
	Uncharacterized protein OS=Equus caballus OX=9796 GN=PIGR PE=4 SV=1
	Query	Observed	Mr(expt)	Mr(calc)	ppm	Miss	Score	Expect	Rank	Unique	Peptide
	446	496.2612	990.5078	990.5094	-1.66	0	44	0.0035	1	U	K.GTGSGALSSVR.A
26.	F7DMT7 Score: 39 Matches: 2(2) Sequences: 1(1) emPAI: 0.06
	Importin subunit alpha OS=Equus caballus OX=9796 GN=KPNA5 PE=3 SV=1
	Query	Observed	Mr(expt)	Mr(calc)	ppm	Miss	Score	Expect	Rank	Unique	Peptide
	324	421.7580	841.5014	840.4930	1200	1	35	0.0095	1	U	R.RNVSLPR.N 323
27.	A0A0B4J1C4 Mass: 17841 Score: 39 Matches: 1(1) Sequences: 1(1) emPAI: 0.19
	Joining chain of multimeric IgA and IgM OS=Equus caballus OX=9796 GN=JCHAIN PE=4 SV=1
	Query	Observed	Mr(expt)	Mr(calc)	ppm	Miss	Score	Expect	Rank	Unique	Peptide
	543	532.2916	1062.5686	1062.5710	-2.25	0	39	0.011	1	U	R.VPLTYGGQTK.I
28.	F6W039 Mass: 23409 Score: 38 Matches: 1(1) Sequences: 1(1) emPAI: 0.14
	Rho GDP dissociation inhibitor alpha OS=Equus caballus OX=9796 GN=ARHGDIA PE=4 SV=1
	Query	Observed	Mr(expt)	Mr(calc)	ppm	Miss	Score	Expect	Rank	Unique	Peptide
	1075	833.9576	1665.9007	1665.9050	-2.57	0	38	0.0078	1	U	R.VAVSTDPNVPNVVVTR.L
29.	F6V5H1 Mass: 11238 Score: 29 Matches: 1(0) Sequences: 1(0) emPAI: 0.31
	Immunoglobulin kappa constant OS=Equus caballus OX=9796 GN=IGKC PE=4 SV=1
	Query	Observed	Mr(expt)	Mr(calc)	ppm	Miss	Score	Expect	Rank	Unique	Peptide
	1011	518.5731	1552.6975	1552.7005	-1.93	0	29	0.1	1	U	K.TSSFHSSLTEQDSK.D
30.	F6R1I4 Mass: 9679 Score: 28 Matches: 1(0) Sequences: 1(0) emPAI: 0.36
	Uteroglobin OS=Equus caballus OX=9796 GN=SCGB1A1 PE=4 SV=1
	Query	Observed	Mr(expt)	Mr(calc)	ppm	Miss	Score	Expect	Rank	Unique	Peptide
	405	466.7704	931.5262	931.5379	-12.57	0	28	0.12	1	U	K.TLVDFLPK.N
	Proteins matching the same set of peptides:
	F6ZSQ2 Mass: 9694 Score: 28 Matches: 1(0) Sequences: 1(0)
	Uteroglobin OS=Equus caballus OX=9796 GN=SCGB1A1 PE=4 SV=1
	F7B739 Mass: 9635 Score: 28 Matches: 1(0) Sequences: 1(0)
	Uncharacterized protein OS=Equus caballus OX=9796 PE=4 SV=1
	Q8MKG2 Mass: 9667 Score: 28 Matches: 1(0) Sequences: 1(0)
	Uteroglobin OS=Equus caballus OX=9796 GN=SCGB1A1 PE=2 SV=2
31.	H9GZV1 Mass: 35602 Score: 28 Matches: 1(0) Sequences: 1(0) emPAI: 0.09
	Uncharacterized protein OS=Equus caballus OX=9796 PE=4 SV=1
	Query	Observed	Mr(expt)	Mr(calc)	ppm	Miss	Score	Expect	Rank	Unique	Peptide
	701	609.3379	1216.6612	1216.6663	-4.17	0	28	0.13	1	U	K.ESQTVSITKPK.E
32.	F7CEG0 Mass: 105045 Score: 28 Matches: 1(0) Sequences: 1(0) emPAI: 0.03
	BBX, HMG-box containing OS=Equus caballus OX=9796 GN=BBX PE=4 SV=1
	Query	Observed	Mr(expt)	Mr(calc)	ppm	Miss	Score	Expect	Rank	Unique	Peptide
	1174	951.9413	1901.8681	1901.9119	-22.99	1	28	0.15	1	U	R.LQKEAEFENSATEHIR.D
	Proteins matching the same set of peptides:
	F7CQH9 Mass: 103100 Score: 28 Matches: 1(0) Sequences: 1(0)
	BBX, HMG-box containing OS=Equus caballus OX=9796 GN=BBX PE=4 SV=1
33.	F7BLE3 Mass: 134841 Score: 28 Matches: 1(0) Sequences: 1(0) emPAI: 0.02
	Uncharacterized protein OS=Equus caballus OX=9796 PE=4 SV=1
	Query	Observed	Mr(expt)	Mr(calc)	ppm	Miss	Score	Expect	Rank	Unique	Peptide
	602	558.3284	1114.6422	1114.6346	6.82	1	28	0.095	1	U	K.RQESLELIK.K
	Proteins matching the same set of peptides:
	F7BTW7 Mass: 185862 Score: 28 Matches: 1(0) Sequences: 1(0)
	Uncharacterized protein OS=Equus caballus OX=9796 GN=LOC100060539 PE=4 SV=1
	F7CJG3 Mass: 185390 Score: 28 Matches: 1(0) Sequences: 1(0)
	Uncharacterized protein OS=Equus caballus OX=9796 GN=LOC100060539 PE=4 SV=1
	F7E454 Mass: 183620 Score: 28 Matches: 1(0) Sequences: 1(0)
	Uncharacterized protein OS=Equus caballus OX=9796 GN=LOC100060539 PE=4 SV=1
34.	F6QDV6 Mass: 48958 Score: 26 Matches: 1(0) Sequences: 1(0) emPAI: 0.07
	Tubulin tyrosine ligase like 1 OS=Equus caballus OX=9796 GN=TTLL1 PE=4 SV=1
	Query	Observed	Mr(expt)	Mr(calc)	ppm	Miss	Score	Expect	Rank	Unique	Peptide
	556	537.2667	1072.5189	1071.5084	943	0	26	0.21	1	U	K.TSSFVSQSTK.E
35.	F6U4X2 Score: 23 Matches: 1(0) Sequences: 1(0) emPAI: 0.05
	Alpha-fetoprotein OS=Equus caballus OX=9796 GN=AFP PE=4 SV=1
	Query	Observed	Mr(expt)	Mr(calc)	ppm	Miss	Score	Expect	Rank	Unique	Peptide
	399	464.2460	926.4775	926.4861	-9.30	0	23	0.24	1	U	R.YLYEIAR.R
	Proteins matching the same set of peptides:
	P49066 Score: 23 Matches: 1(0) Sequences: 1(0)
	Alpha-fetoprotein OS=Equus caballus OX=9796 GN=AFP PE=2 SV=1
Mascot: http://www.matrixscience.com/

## Sheet: Band 6
Mascot Search Results
Search title : Uniprot_Horse_25ppm-05Da
MS data file : 56294995342143273.mgf
Database : Uniprot-Horse UP000002281-25-02-2019 (22705 sequences; 12757064 residues)
Timestamp : 5 Apr 2019 at 17:02:22 GMT
Enzyme : Trypsin
Variable modifications : Carbamidomethyl (C),Deamidated (NQ),Oxidation (M)
Mass values : Monoisotopic
Protein Mass : Unrestricted
Peptide Mass Tolerance : ± 25 ppm (# 13C = 1)
Fragment Mass Tolerance: ± 0.06 Da
Max Missed Cleavages : 1
Instrument type : ESI-QUAD-TOF
Number of queries : 1222
Protein hits :	F7DYB1	Alpha-amylase OS=Equus caballus OX=9796 GN=LOC100049851 PE=3 SV=1
	F7DJZ1	BPI fold containing family B member 1 OS=Equus caballus OX=9796 GN=BPIFB1 PE=4 SV=1
	F7BAY6	Serum albumin OS=Equus caballus OX=9796 GN=ALB PE=4 SV=1
	F6SJK9	Uncharacterized protein OS=Equus caballus OX=9796 PE=3 SV=1
	F7CYR1	Serpin family C member 1 OS=Equus caballus OX=9796 GN=SERPINC1 PE=3 SV=1
	H9GZV1	Uncharacterized protein OS=Equus caballus OX=9796 PE=4 SV=1
	F7B7X0	Keratin 1 OS=Equus caballus OX=9796 GN=KRT1 PE=3 SV=1
	F6ZEQ3	Keratin 16 OS=Equus caballus OX=9796 GN=KRT16 PE=3 SV=1
	F6RDD3	Globin A1 OS=Equus caballus OX=9796 GN=HBB PE=3 SV=1
	F6SHJ8	Uncharacterized protein OS=Equus caballus OX=9796 PE=3 SV=1
	F7ASU6	Selenium binding protein 1 OS=Equus caballus OX=9796 GN=SELENBP1 PE=4 SV=1
	F6WGX6	Keratin 77 OS=Equus caballus OX=9796 GN=KRT77 PE=3 SV=1
	F6YIC8	Hemoglobin subunit zeta OS=Equus caballus OX=9796 GN=HBZ PE=3 SV=1
	F6R1I4	Uteroglobin OS=Equus caballus OX=9796 GN=SCGB1A1 PE=4 SV=1
	F6W7V0	Keratin 5 OS=Equus caballus OX=9796 GN=KRT5 PE=3 SV=1
	F6U4X2	Alpha-fetoprotein OS=Equus caballus OX=9796 GN=AFP PE=4 SV=1
	F6T323	Uncharacterized protein OS=Equus caballus OX=9796 GN=LOC100055297 PE=3 SV=1
	F7CKH3	Retinal dehydrogenase 1 OS=Equus caballus OX=9796 GN=ALDH1A1 PE=3 SV=1
	F6ZND8	Uncharacterized protein OS=Equus caballus OX=9796 GN=KRT6C PE=3 SV=1
	F7DMT7	Importin subunit alpha OS=Equus caballus OX=9796 GN=KPNA5 PE=3 SV=1
	F7CV34	Intestine specific homeobox OS=Equus caballus OX=9796 GN=ISX PE=4 SV=1
	F7C450	Alpha 2-HS glycoprotein OS=Equus caballus OX=9796 GN=AHSG PE=4 SV=1
	H9GZT5	Uncharacterized protein OS=Equus caballus OX=9796 PE=4 SV=1
Select Summary Report
			Help
	Significance threshold p<	Max. number of hits
	Standard scoring MudPIT scoring	Ions score or expect cut-off	Show sub-sets
	Show pop-ups Suppress pop-ups		Require bold red
	Preferred taxonomy
All queries Unassigned Below homology threshold Below identity threshold
1.	F7DYB1 Mass: 57329 Score: 973 Matches: 28(24) Sequences: 10(9) emPAI: 2.06
	Alpha-amylase OS=Equus caballus OX=9796 GN=LOC100049851 PE=3 SV=1
	Query	Observed	Mr(expt)	Mr(calc)	ppm	Miss	Score	Expect	Rank	Unique	Peptide
	188	329.7175	657.4204	657.4174	4.70	0	41	0.0081	1	U	K.LGTVLR.R
	388	492.2413	982.4681	982.4695	-1.44	0	25	0.21	1	U	K.HMWPGDIK.A 389
	396	494.2179	986.4213	986.4094	12.1	0	47	0.00051	1	U	K.GSEYFGNGR.V 393 394
	413	500.2393	998.4640	998.4644	-0.36	0	(24)	0.26	1	U	K.HMWPGDIK.A
	578	585.3633	1168.7120	1168.7067	4.53	0	54	8e-005	1	U	R.VVGLLDLALEK.D
	702	429.8985	1286.6737	1286.6772	-2.71	0	(56)	0.00025	1	U	R.TSIVHLFEWR.W
	703	644.3457	1286.6769	1286.6772	-0.23	0	61	7.7e-005	1	U	R.TSIVHLFEWR.W
	847	476.5707	1426.6904	1426.6953	-3.46	0	(70)	7.9e-006	1	U	R.ALVFVDNHDNQR.G
	848	714.3539	1426.6932	1426.6953	-1.48	0	95	2.7e-008	1	U	R.ALVFVDNHDNQR.G 849
	853	476.8990	1427.6753	1427.6793	-2.82	0	(78)	1.5e-006	1	U	R.ALVFVDNHDNQR.G
	854	714.8461	1427.6776	1427.6793	-1.23	0	(81)	7e-007	1	U	R.ALVFVDNHDNQR.G
	855	714.8470	1427.6795	1427.6793	0.14	0	(53)	0.00043	1	U	R.ALVFVDNHDNQR.G
	856	714.8481	1427.6816	1427.6793	1.59	0	(87)	1.9e-007	1	U	R.ALVFVDNHDNQR.G
	932	769.8264	1537.6383	1537.6409	-1.67	0	(50)	0.00039	1	U	K.NWGEGWGFMPSDR.A
	941	777.8224	1553.6303	1553.6358	-3.49	0	54	0.00013	1	U	K.NWGEGWGFMPSDR.A
	943	519.2274	1554.6602	1554.6733	-8.38	1	(86)	1.2e-007	1	U	R.SGNEDEFRDMVTR.C
	944	778.3376	1554.6607	1554.6733	-8.06	1	(24)	0.21	1	U	R.SGNEDEFRDMVTR.C
	955	524.5634	1570.6684	1570.6682	0.15	1	93	2.6e-008	1	U	R.SGNEDEFRDMVTR.C 953
	956	786.3420	1570.6694	1570.6682	0.78	1	(33)	0.029	1	U	R.SGNEDEFRDMVTR.C
	1030	571.9451	1712.8136	1712.8167	-1.84	0	(45)	0.0033	1	U	K.MAVGFMLAHPYGFTR.I
	1031	571.9454	1712.8143	1712.8167	-1.41	0	(43)	0.0054	1	U	K.MAVGFMLAHPYGFTR.I
	1036	577.2722	1728.7946	1728.8116	-9.83	0	58	0.00014	1	U	K.MAVGFMLAHPYGFTR.I
	1183	1207.5531	2413.0916	2413.0934	-0.74	0	75	3e-006	1	U	R.NFQNGQDANDWIGPPNNNGVIK.E
2.	F7DJZ1 Mass: 51400 Score: 343 Matches: 10(9) Sequences: 8(7) emPAI: 0.75
	BPI fold containing family B member 1 OS=Equus caballus OX=9796 GN=BPIFB1 PE=4 SV=1
	Query	Observed	Mr(expt)	Mr(calc)	ppm	Miss	Score	Expect	Rank	Unique	Peptide
	364	473.7725	945.5304	945.5317	-1.37	0	47	0.0016	1	U	R.LPLLSTMR.E
	534	559.3091	1116.6037	1116.6213	-15.71	0	61	8.5e-005	1	U	K.LSSGIPVSMVK.A
	543	567.3152	1132.6158	1132.6162	-0.33	0	(47)	0.0015	1	U	K.LSSGIPVSMVK.A
	651	620.3126	1238.6106	1238.6044	4.99	0	25	0.27	1	U	K.DHDAVDILWR.L
	899	494.2656	1479.7749	1479.7834	-5.77	1	55	0.00026	1	U	K.LKDHDAVDILWR.L 900
	1014	828.4312	1654.8478	1654.8638	-9.71	0	44	0.0036	1	U	K.GDQLVLNLNEISANR.I
	1029	856.4632	1710.9118	1710.9152	-1.97	0	92	3.8e-008	1	U	K.IVTQETPELLLDQGR.A
	1047	885.4823	1768.9500	1768.9571	-3.97	0	74	2.1e-006	1	U	K.VISETAADQLGPTQIVK.I
	1088	630.6392	1888.8957	1888.9023	-3.49	0	71	9.5e-006	1	U	K.SIVEMHMETEAQAIIR.V
3.	F7BAY6 Mass: 68328 Score: 318 Matches: 14(12) Sequences: 12(12) emPAI: 0.84
	Serum albumin OS=Equus caballus OX=9796 GN=ALB PE=4 SV=1
	Query	Observed	Mr(expt)	Mr(calc)	ppm	Miss	Score	Expect	Rank	Unique	Peptide
	215	366.2371	730.4596	730.4589	1.05	0	55	0.00013	1	U	R.ILLSSAK.E
	251	395.2396	788.4647	788.4644	0.41	0	45	0.0022	1	U	K.IVTDLTK.V 250
	301	433.7168	865.4190	865.4181	0.97	0	41	0.0073	1	U	K.ADFAEVSK.I
	343	457.2419	912.4692	912.4705	-1.47	0	30	0.049	1	U	K.YLYEVAR.R
	367	477.7429	953.4712	953.4706	0.65	0	31	0.049	1	U	K.TYEATLEK.C
	371	479.7819	957.5493	957.5495	-0.19	0	47	0.0013	1	U	K.QSALAELVK.H
	436	509.2703	1016.5260	1016.5291	-3.07	0	34	0.052	1	U	K.SLHTLFGDK.L
	509	543.8283	1085.6421	1085.6444	-2.17	1	46	0.0013	1	U	K.KQSALAELVK.H
	552	575.3129	1148.6112	1148.6077	3.01	0	61	7.1e-005	1	U	K.LVNEVTEFAK.K
	555	575.8037	1149.5929	1149.5917	0.99	0	(24)	0.32	1	U	K.LVNEVTEFAK.K
	674	627.3452	1252.6758	1252.6816	-4.65	0	66	1.3e-005	1	U	K.TVLGNFSAFVAK.C
	888	734.4127	1466.8109	1466.8093	1.09	0	67	6.9e-006	1	U	K.APQVSTPTLVEIGR.T
	975	798.4625	1594.9105	1594.9043	3.92	1	32	0.011	1	U	K.KAPQVSTPTLVEIGR.T
	Proteins matching the same set of peptides:
	P35747 Mass: 68554 Score: 318 Matches: 14(12) Sequences: 12(12)
	Serum albumin OS=Equus caballus OX=9796 GN=ALB PE=1 SV=1
4.	F6SJK9 Mass: 39128 Score: 305 Matches: 9(8) Sequences: 8(7) emPAI: 0.91
	Uncharacterized protein OS=Equus caballus OX=9796 PE=3 SV=1
	Query	Observed	Mr(expt)	Mr(calc)	ppm	Miss	Score	Expect	Rank	Unique	Peptide
	258	404.2058	806.3971	806.3923	5.97	0	37	0.023	1		R.LAADDFR.L
	260	405.2232	808.4319	808.4330	-1.46	0	21	0.45	1		R.LASYLDK.V
	450	516.2974	1030.5802	1030.5910	-10.52	0	38	0.015	1	U	R.VLDELTLTK.A
	515	545.7679	1089.5213	1089.5237	-2.15	0	59	0.00012	1	U	K.VTMQNLNDR.L
	575	583.2970	1164.5794	1164.5775	1.69	0	61	7.9e-005	1	U	R.LENEIQTYR.S
	614	601.3102	1200.6058	1200.6098	-3.36	0	(59)	0.0001	1		R.QSVEADINGLR.R
	617	601.8011	1201.5876	1201.5939	-5.19	0	70	7.6e-006	1		R.QSVEADINGLR.R
	807	691.3253	1380.6360	1380.6408	-3.53	0	78	1.3e-006	1	U	R.ALEESNYELEGK.I
	817	695.8441	1389.6736	1389.6736	0.00	0	89	1.5e-007	1	U	K.QSLEASLAETEGR.Y
	Proteins matching the same set of peptides:
	F6SQQ0 Mass: 42063 Score: 305 Matches: 9(8) Sequences: 8(7)
	Uncharacterized protein OS=Equus caballus OX=9796 PE=3 SV=1
	F6SS14 Mass: 49929 Score: 305 Matches: 9(8) Sequences: 8(7)
	Uncharacterized protein OS=Equus caballus OX=9796 PE=3 SV=1
	F6WDW3 Mass: 42694 Score: 305 Matches: 9(8) Sequences: 8(7)
	Uncharacterized protein OS=Equus caballus OX=9796 PE=3 SV=1
5.	F7CYR1 Mass: 52337 Score: 140 Matches: 4(4) Sequences: 4(4) emPAI: 0.28
	Serpin family C member 1 OS=Equus caballus OX=9796 GN=SERPINC1 PE=3 SV=1
	Query	Observed	Mr(expt)	Mr(calc)	ppm	Miss	Score	Expect	Rank	Unique	Peptide
	340	456.2597	910.5049	910.5236	-20.59	0	55	0.00012	1	U	K.LPGIVAEGR.S
	538	563.8318	1125.6490	1125.6506	-1.39	1	35	0.008	1	U	K.SKLPGIVAEGR.S
	697	641.3083	1280.6020	1280.6037	-1.32	0	77	2.1e-006	1	U	R.SDLYVSDAFHK.A
	1082	625.6275	1873.8607	1873.8653	-2.48	1	32	0.056	1	U	K.ATEDEGSEQKIPEATNR.R
6.	H9GZV1 Mass: 35602 Score: 136 Matches: 2(2) Sequences: 2(2) emPAI: 0.19
	Uncharacterized protein OS=Equus caballus OX=9796 PE=4 SV=1
	Query	Observed	Mr(expt)	Mr(calc)	ppm	Miss	Score	Expect	Rank	Unique	Peptide
	633	609.3396	1216.6646	1216.6663	-1.36	0	71	6e-006	1	U	K.ESQTVSITKPK.E
	1026	851.4654	1700.9162	1700.9097	3.82	0	83	3e-007	1	U	R.EPGQSVPTFAVTSLLR.V
7.	F7B7X0 Mass: 66053 Score: 135 Matches: 4(4) Sequences: 4(4) emPAI: 0.21
	Keratin 1 OS=Equus caballus OX=9796 GN=KRT1 PE=3 SV=1
	Query	Observed	Mr(expt)	Mr(calc)	ppm	Miss	Score	Expect	Rank	Unique	Peptide
	451	517.2624	1032.5102	1032.5087	1.45	0	49	0.0017	1	U	R.TLLEGEESR.M
	489	533.2633	1064.5121	1064.5138	-1.64	0	38	0.014	1	U	R.AQYEDIAQK.S
	683	633.3222	1264.6299	1264.6299	-0.04	0	49	0.0012	1	U	R.TNAENEFVTIK.K
	895	738.3945	1474.7744	1474.7780	-2.44	0	77	2.4e-006	1		R.FLEQQNQVLQTK.W
8.	F6ZEQ3 Mass: 50796 Score: 128 Matches: 5(4) Sequences: 4(3) emPAI: 0.29
	Keratin 16 OS=Equus caballus OX=9796 GN=KRT16 PE=3 SV=1
	Query	Observed	Mr(expt)	Mr(calc)	ppm	Miss	Score	Expect	Rank	Unique	Peptide
	258	404.2058	806.3971	806.3923	5.97	0	37	0.023	1		R.LAADDFR.T
	260	405.2232	808.4319	808.4330	-1.46	0	21	0.45	1		R.LASYLDK.V
	444	515.3008	1028.5871	1028.5866	0.52	0	34	0.031	1	U	R.VLDELTLAR.T
	614	601.3102	1200.6058	1200.6098	-3.36	0	(59)	0.0001	1		R.QSVEADINGLR.R
	617	601.8011	1201.5876	1201.5939	-5.19	0	70	7.6e-006	1		R.QSVEADINGLR.R
9.	F6RDD3 Mass: 16129 Score: 128 Matches: 3(3) Sequences: 3(3) emPAI: 0.77
	Globin A1 OS=Equus caballus OX=9796 GN=HBB PE=3 SV=1
	Query	Observed	Mr(expt)	Mr(calc)	ppm	Miss	Score	Expect	Rank	Unique	Peptide
	554	575.3387	1148.6629	1148.6666	-3.17	0	47	0.00051	1	U	K.VVAGVANALAHK.Y
	785	679.8338	1357.6530	1357.6474	4.20	0	54	0.00032	1	U	K.VNEEEVGGEALGR.L
	843	713.8435	1425.6725	1425.6776	-3.60	0	79	1.2e-006	1	U	K.DFTPELQASYQK.V
	Proteins matching the same set of peptides:
	P02062 Mass: 15998 Score: 128 Matches: 3(3) Sequences: 3(3)
	Hemoglobin subunit beta OS=Equus caballus OX=9796 GN=HBB PE=1 SV=1
10.	F6SHJ8 Mass: 61290 Score: 127 Matches: 2(2) Sequences: 2(2) emPAI: 0.11
	Uncharacterized protein OS=Equus caballus OX=9796 PE=3 SV=1
	Query	Observed	Mr(expt)	Mr(calc)	ppm	Miss	Score	Expect	Rank	Unique	Peptide
	625	604.8098	1207.6051	1207.6085	-2.80	0	82	7.3e-007	1	U	R.TAAENDFVTLK.K
	895	738.3945	1474.7744	1474.7780	-2.44	0	77	2.4e-006	1		R.FLEQQNQVLQTK.W
	Proteins matching the same set of peptides:
	F7A559 Mass: 62690 Score: 127 Matches: 2(2) Sequences: 2(2)
	Uncharacterized protein OS=Equus caballus OX=9796 PE=3 SV=1
	F7AAI4 Mass: 52384 Score: 127 Matches: 2(2) Sequences: 2(2)
	Uncharacterized protein OS=Equus caballus OX=9796 PE=3 SV=1
	F7AN17 Mass: 63335 Score: 127 Matches: 2(2) Sequences: 2(2)
	Uncharacterized protein OS=Equus caballus OX=9796 PE=3 SV=1
	F7BP93 Mass: 56773 Score: 127 Matches: 2(2) Sequences: 2(2)
	Uncharacterized protein OS=Equus caballus OX=9796 PE=3 SV=1
11.	F7ASU6 Mass: 52781 Score: 125 Matches: 6(4) Sequences: 6(4) emPAI: 0.44
	Selenium binding protein 1 OS=Equus caballus OX=9796 GN=SELENBP1 PE=4 SV=1
	Query	Observed	Mr(expt)	Mr(calc)	ppm	Miss	Score	Expect	Rank	Unique	Peptide
	411	498.7884	995.5622	995.5651	-2.98	0	21	0.23	1	U	K.SQPEPLVVK.G
	474	526.2813	1050.5479	1050.5498	-1.78	0	36	0.02	1	U	K.QFYPDLIR.E
	528	553.7611	1105.5077	1105.5040	3.32	0	24	0.47	1	U	K.NEGGTWSVEK.V
	632	607.8145	1213.6145	1213.6204	-4.85	0	46	0.0019	1	U	K.SPQYSQVIHR.L
	665	624.3356	1246.6566	1246.6558	0.66	0	48	0.0013	1	U	R.IYVVDVGTEPR.A
	829	706.3676	1410.7207	1410.7355	-10.48	0	45	0.0024	1	U	K.GGPVQVLEDQELK.S
	Proteins matching the same set of peptides:
	F7CI32 Mass: 52491 Score: 125 Matches: 6(4) Sequences: 6(4)
	Selenium binding protein 1 OS=Equus caballus OX=9796 GN=SELENBP1 PE=4 SV=1
	F7DKR3 Mass: 53161 Score: 125 Matches: 6(4) Sequences: 6(4)
	Selenium binding protein 1 OS=Equus caballus OX=9796 GN=SELENBP1 PE=4 SV=1
12.	F6WGX6 Mass: 62957 Score: 106 Matches: 2(2) Sequences: 2(2) emPAI: 0.11
	Keratin 77 OS=Equus caballus OX=9796 GN=KRT77 PE=3 SV=1
	Query	Observed	Mr(expt)	Mr(calc)	ppm	Miss	Score	Expect	Rank	Unique	Peptide
	894	738.3773	1474.7400	1474.7416	-1.11	0	60	0.00011	1	U	K.WELLQQVDTSTR.T
	895	738.3945	1474.7744	1474.7780	-2.44	0	77	2.4e-006	1		R.FLEQQNQVLQTK.W
13.	F6YIC8 Mass: 15442 Score: 77 Matches: 1(1) Sequences: 1(1) emPAI: 0.22
	Hemoglobin subunit zeta OS=Equus caballus OX=9796 GN=HBZ PE=3 SV=1
	Query	Observed	Mr(expt)	Mr(calc)	ppm	Miss	Score	Expect	Rank	Unique	Peptide
	687	634.8574	1267.7002	1267.7024	-1.74	0	77	6.9e-007	1	U	K.FLSSVSTVLTSK.Y
	Proteins matching the same set of peptides:
	P01958 Mass: 15236 Score: 77 Matches: 1(1) Sequences: 1(1)
	Hemoglobin subunit alpha OS=Equus caballus OX=9796 GN=HBA PE=1 SV=2
14.	F6R1I4 Mass: 9679 Score: 40 Matches: 1(1) Sequences: 1(1) emPAI: 0.36
	Uteroglobin OS=Equus caballus OX=9796 GN=SCGB1A1 PE=4 SV=1
	Query	Observed	Mr(expt)	Mr(calc)	ppm	Miss	Score	Expect	Rank	Unique	Peptide
	358	466.7721	931.5296	931.5379	-8.84	0	40	0.0064	1	U	K.TLVDFLPK.N
	Proteins matching the same set of peptides:
	F6ZSQ2 Mass: 9694 Score: 40 Matches: 1(1) Sequences: 1(1)
	Uteroglobin OS=Equus caballus OX=9796 GN=SCGB1A1 PE=4 SV=1
	F7B739 Mass: 9635 Score: 40 Matches: 1(1) Sequences: 1(1)
	Uncharacterized protein OS=Equus caballus OX=9796 PE=4 SV=1
	Q8MKG2 Mass: 9667 Score: 40 Matches: 1(1) Sequences: 1(1)
	Uteroglobin OS=Equus caballus OX=9796 GN=SCGB1A1 PE=2 SV=2
15.	F6W7V0 Mass: 62397 Score: 39 Matches: 1(1) Sequences: 1(1) emPAI: 0.05
	Keratin 5 OS=Equus caballus OX=9796 GN=KRT5 PE=3 SV=1
	Query	Observed	Mr(expt)	Mr(calc)	ppm	Miss	Score	Expect	Rank	Unique	Peptide
	607	597.7875	1193.5605	1193.5676	-5.97	0	39	0.012	1	U	K.YEELQQTAGR.H
16.	F6U4X2 Score: 39 Matches: 2(1) Sequences: 1(1) emPAI: 0.05
	Alpha-fetoprotein OS=Equus caballus OX=9796 GN=AFP PE=4 SV=1
	Query	Observed	Mr(expt)	Mr(calc)	ppm	Miss	Score	Expect	Rank	Unique	Peptide
	354	464.2501	926.4856	926.4861	-0.54	0	36	0.015	1	U	R.YLYEIAR.R 353
	Proteins matching the same set of peptides:
	P49066 Score: 39 Matches: 2(1) Sequences: 1(1)
	Alpha-fetoprotein OS=Equus caballus OX=9796 GN=AFP PE=2 SV=1
17.	F6T323 Mass: 27112 Score: 38 Matches: 1(1) Sequences: 1(1) emPAI: 0.12
	Uncharacterized protein OS=Equus caballus OX=9796 GN=LOC100055297 PE=3 SV=1
	Query	Observed	Mr(expt)	Mr(calc)	ppm	Miss	Score	Expect	Rank	Unique	Peptide
	1171	746.3770	2236.1092	2236.1011	3.61	0	38	0.018	1	U	R.LGEYNIEVVEGNEQFINAAK.I
18.	F7CKH3 Mass: 54817 Score: 35 Matches: 2(1) Sequences: 2(1) emPAI: 0.06
	Retinal dehydrogenase 1 OS=Equus caballus OX=9796 GN=ALDH1A1 PE=3 SV=1
	Query	Observed	Mr(expt)	Mr(calc)	ppm	Miss	Score	Expect	Rank	Unique	Peptide
	520	548.2844	1094.5542	1094.5608	-6.06	0	22	0.49	1	U	K.VAFTGSTEVGK.L
	860	717.8665	1433.7184	1433.7224	-2.85	0	35	0.047	1	U	K.EEIFGPVQQIMK.F
	Proteins matching the same set of peptides:
	P15437 Mass: 54840 Score: 35 Matches: 2(1) Sequences: 2(1)
	Retinal dehydrogenase 1 OS=Equus caballus OX=9796 GN=ALDH1A1 PE=1 SV=2
19.	F6ZND8 Mass: 59832 Score: 33 Matches: 1(0) Sequences: 1(0) emPAI: 0.05
	Uncharacterized protein OS=Equus caballus OX=9796 GN=KRT6C PE=3 SV=1
	Query	Observed	Mr(expt)	Mr(calc)	ppm	Miss	Score	Expect	Rank	Unique	Peptide
	529	554.2748	1106.5350	1106.5356	-0.53	0	33	0.078	1	U	K.AQYEEIAQR.S
	Proteins matching the same set of peptides:
	F7AGY4 Mass: 60145 Score: 33 Matches: 1(0) Sequences: 1(0)
	Uncharacterized protein OS=Equus caballus OX=9796 PE=3 SV=1
	F7D281 Mass: 59851 Score: 33 Matches: 1(0) Sequences: 1(0)
	Uncharacterized protein OS=Equus caballus OX=9796 GN=KRT6B PE=3 SV=1
	F7D5X8 Mass: 64523 Score: 33 Matches: 1(0) Sequences: 1(0)
	Keratin 4 OS=Equus caballus OX=9796 GN=KRT4 PE=3 SV=1
20.	F7DMT7 Score: 32 Matches: 1(1) Sequences: 1(1) emPAI: 0.06
	Importin subunit alpha OS=Equus caballus OX=9796 GN=KPNA5 PE=3 SV=1
	Query	Observed	Mr(expt)	Mr(calc)	ppm	Miss	Score	Expect	Rank	Unique	Peptide
	279	421.7565	841.4985	840.4930	1196	1	32	0.021	1	U	R.RNVSLPR.N
21.	F7CV34 Mass: 26740 Score: 29 Matches: 1(0) Sequences: 1(0) emPAI: 0.12
	Intestine specific homeobox OS=Equus caballus OX=9796 GN=ISX PE=4 SV=1
	Query	Observed	Mr(expt)	Mr(calc)	ppm	Miss	Score	Expect	Rank	Unique	Peptide
	704	644.3477	1286.6808	1285.6877	772	1	29	0.12	1	U	K.QEKISSLGAPQK.L
22.	F7C450 Mass: 38243 Score: 25 Matches: 1(0) Sequences: 1(0) emPAI: 0.09
	Alpha 2-HS glycoprotein OS=Equus caballus OX=9796 GN=AHSG PE=4 SV=1
	Query	Observed	Mr(expt)	Mr(calc)	ppm	Miss	Score	Expect	Rank	Unique	Peptide
	377	483.7687	965.5229	965.5294	-6.73	0	25	0.18	1	U	K.HVLNQIDK.V
23.	H9GZT5 Mass: 36409 Score: 22 Matches: 1(1) Sequences: 1(1) emPAI: 0.09
	Uncharacterized protein OS=Equus caballus OX=9796 PE=4 SV=1
	Query	Observed	Mr(expt)	Mr(calc)	ppm	Miss	Score	Expect	Rank	Unique	Peptide
	530	554.3438	1106.6729	1106.6812	-7.43	0	22	0.054	1	U	R.VVSILAIQHK.D
Mascot: http://www.matrixscience.com/

## Sheet: Band7
Mascot Search Results
Search title : Uniprot_Horse_25ppm-05Da
MS data file : 56294995342143274.mgf
Database : Uniprot-Horse UP000002281-25-02-2019 (22705 sequences; 12757064 residues)
Timestamp : 5 Apr 2019 at 17:02:23 GMT
Enzyme : Trypsin
Variable modifications : Carbamidomethyl (C),Deamidated (NQ),Oxidation (M)
Mass values : Monoisotopic
Protein Mass : Unrestricted
Peptide Mass Tolerance : ± 25 ppm (# 13C = 1)
Fragment Mass Tolerance: ± 0.06 Da
Max Missed Cleavages : 1
Instrument type : ESI-QUAD-TOF
Number of queries : 1209
Protein hits :	F7BAY6	Serum albumin OS=Equus caballus OX=9796 GN=ALB PE=4 SV=1
	F6SJK9	Uncharacterized protein OS=Equus caballus OX=9796 PE=3 SV=1
	F7B7X0	Keratin 1 OS=Equus caballus OX=9796 GN=KRT1 PE=3 SV=1
	F7DYB1	Alpha-amylase OS=Equus caballus OX=9796 GN=LOC100049851 PE=3 SV=1
	F6RDD3	Globin A1 OS=Equus caballus OX=9796 GN=HBB PE=3 SV=1
	F7DXM5	Uncharacterized protein OS=Equus caballus OX=9796 GN=LOC100065068 PE=3 SV=1
	F7AAK7	Actin gamma 1 OS=Equus caballus OX=9796 GN=ACTG1 PE=3 SV=1
	F6WGX6	Keratin 77 OS=Equus caballus OX=9796 GN=KRT77 PE=3 SV=1
	F6SHJ8	Uncharacterized protein OS=Equus caballus OX=9796 PE=3 SV=1
	F7CYR1	Serpin family C member 1 OS=Equus caballus OX=9796 GN=SERPINC1 PE=3 SV=1
	F7CSL8	Uncharacterized protein OS=Equus caballus OX=9796 PE=3 SV=1
	F6ZND8	Uncharacterized protein OS=Equus caballus OX=9796 GN=KRT6C PE=3 SV=1
	F6W7V0	Keratin 5 OS=Equus caballus OX=9796 GN=KRT5 PE=3 SV=1
	F6ZEQ3	Keratin 16 OS=Equus caballus OX=9796 GN=KRT16 PE=3 SV=1
	F7BF31	Uncharacterized protein OS=Equus caballus OX=9796 GN=SPI2 PE=3 SV=1
	F7DJZ1	BPI fold containing family B member 1 OS=Equus caballus OX=9796 GN=BPIFB1 PE=4 SV=1
	F6T323	Uncharacterized protein OS=Equus caballus OX=9796 GN=LOC100055297 PE=3 SV=1
	F6XWM5	Haptoglobin OS=Equus caballus OX=9796 PE=3 SV=1
	H9GZV1	Uncharacterized protein OS=Equus caballus OX=9796 PE=4 SV=1
	F7BRC5	Plasmalemma vesicle associated protein OS=Equus caballus OX=9796 GN=PLVAP PE=4 SV=1
	P01958	Hemoglobin subunit alpha OS=Equus caballus OX=9796 GN=HBA PE=1 SV=2
	F6QAU5	Uncharacterized protein OS=Equus caballus OX=9796 PE=4 SV=1
	F7D7M7	Uncharacterized protein OS=Equus caballus OX=9796 PE=4 SV=1
	A0A0B4J1C4	Joining chain of multimeric IgA and IgM OS=Equus caballus OX=9796 GN=JCHAIN PE=4 SV=1
	F7DMT7	Importin subunit alpha OS=Equus caballus OX=9796 GN=KPNA5 PE=3 SV=1
	F6U4X2	Alpha-fetoprotein OS=Equus caballus OX=9796 GN=AFP PE=4 SV=1
	F6R1I4	Uteroglobin OS=Equus caballus OX=9796 GN=SCGB1A1 PE=4 SV=1
	F6RMD0	Uncharacterized protein OS=Equus caballus OX=9796 GN=CFB PE=3 SV=1
Select Summary Report
			Help
	Significance threshold p<	Max. number of hits
	Standard scoring MudPIT scoring	Ions score or expect cut-off	Show sub-sets
	Show pop-ups Suppress pop-ups		Require bold red
	Preferred taxonomy
All queries Unassigned Below homology threshold Below identity threshold
1.	F7BAY6 Mass: 68328 Score: 844 Matches: 27(25) Sequences: 16(15) emPAI: 1.68
	Serum albumin OS=Equus caballus OX=9796 GN=ALB PE=4 SV=1
	Query	Observed	Mr(expt)	Mr(calc)	ppm	Miss	Score	Expect	Rank	Unique	Peptide
	219	366.2354	730.4563	730.4589	-3.54	0	43	0.0018	1	U	R.ILLSSAK.E
	240	395.2388	788.4630	788.4644	-1.75	0	52	0.00046	1	U	K.IVTDLTK.V 239
	303	433.7169	865.4193	865.4181	1.33	0	44	0.0036	1	U	K.ADFAEVSK.I
	351	457.2430	912.4714	912.4705	1.01	0	30	0.053	1	U	K.YLYEVAR.R
	374	477.7416	953.4687	953.4706	-1.92	0	42	0.0046	1	U	K.TYEATLEK.C
	378	479.7827	957.5508	957.5495	1.34	0	71	4.7e-006	1	U	K.QSALAELVK.H 379
	380	480.2736	958.5327	958.5335	-0.82	0	(46)	0.0019	1	U	K.QSALAELVK.H
	496	543.8240	1085.6334	1085.6444	-10.16	1	55	0.00019	1	U	K.KQSALAELVK.H
	502	544.3229	1086.6312	1086.6284	2.55	1	(35)	0.02	1	U	K.KQSALAELVK.H
	555	575.3102	1148.6058	1148.6077	-1.67	0	61	7.5e-005	1	U	K.LVNEVTEFAK.K 558
	560	575.8068	1149.5991	1149.5917	6.40	0	(57)	0.00015	1	U	K.LVNEVTEFAK.K
	649	627.3450	1252.6755	1252.6816	-4.84	0	68	8.3e-006	1	U	K.TVLGNFSAFVAK.C
	682	650.3582	1298.7019	1298.6983	2.78	0	65	2e-005	1	U	R.HPDYSVSLLLR.I 681
	796	690.3150	1378.6155	1378.6187	-2.35	0	32	0.048	1	U	K.YICEHQDSISGK.L
	879	485.9383	1454.7931	1454.7994	-4.28	1	78	8.3e-007	1	U	R.RHPDYSVSLLLR.I 881
	891	734.4033	1466.7920	1466.8093	-11.81	0	98	8.4e-009	1	U	K.APQVSTPTLVEIGR.T
	963	532.6428	1594.9066	1594.9043	1.50	1	(68)	2.8e-006	1	U	K.KAPQVSTPTLVEIGR.T
	964	798.4608	1594.9071	1594.9043	1.77	1	105	6.9e-010	1	U	K.KAPQVSTPTLVEIGR.T
	966	798.9481	1595.8817	1595.8883	-4.12	1	(28)	0.06	1	U	K.KAPQVSTPTLVEIGR.T
	967	532.9684	1595.8835	1595.8883	-2.98	1	(57)	7e-005	1	U	K.KAPQVSTPTLVEIGR.T
	982	805.3941	1608.7737	1608.7824	-5.44	0	69	1.5e-005	1	U	K.DVFLGTFLYEYSR.R
	1139	714.0080	2139.0022	2139.0101	-3.73	0	24	0.49	1	U	R.HPYFYGPELLFHAEEYK.A
	Proteins matching the same set of peptides:
	P35747 Mass: 68554 Score: 844 Matches: 27(25) Sequences: 16(15)
	Serum albumin OS=Equus caballus OX=9796 GN=ALB PE=1 SV=1
2.	F6SJK9 Mass: 39128 Score: 271 Matches: 10(8) Sequences: 10(8) emPAI: 1.25
	Uncharacterized protein OS=Equus caballus OX=9796 PE=3 SV=1
	Query	Observed	Mr(expt)	Mr(calc)	ppm	Miss	Score	Expect	Rank	Unique	Peptide
	250	404.2036	806.3926	806.3923	0.36	0	38	0.018	1		R.LAADDFR.L
	255	405.2241	808.4337	808.4330	0.80	0	35	0.016	1		R.LASYLDK.V
	408	498.2585	994.5025	994.5123	-9.86	1	23	0.34	1	U	K.IKEWYEK.H
	444	516.3054	1030.5962	1030.5910	4.99	0	41	0.0045	1	U	R.VLDELTLTK.A
	504	545.7687	1089.5228	1089.5237	-0.81	0	50	0.00094	1	U	K.VTMQNLNDR.L
	515	555.2491	1108.4836	1108.4825	1.00	0	41	0.0052	1	U	K.DAEAWFNEK.S
	576	583.2980	1164.5815	1164.5775	3.48	0	58	0.00018	1	U	R.LENEIQTYR.S
	611	601.8146	1201.6146	1201.5939	17.3	0	27	0.19	1		R.QSVEADINGLR.R
	798	691.3286	1380.6427	1380.6408	1.33	0	107	1.7e-009	1	U	R.ALEESNYELEGK.I
	813	695.8455	1389.6765	1389.6736	2.11	0	81	9.9e-007	1	U	K.QSLEASLAETEGR.Y
	Proteins matching the same set of peptides:
	F6SQQ0 Mass: 42063 Score: 271 Matches: 10(8) Sequences: 10(8)
	Uncharacterized protein OS=Equus caballus OX=9796 PE=3 SV=1
	F6SS14 Mass: 49929 Score: 271 Matches: 10(8) Sequences: 10(8)
	Uncharacterized protein OS=Equus caballus OX=9796 PE=3 SV=1
	F6WDW3 Mass: 42694 Score: 271 Matches: 10(8) Sequences: 10(8)
	Uncharacterized protein OS=Equus caballus OX=9796 PE=3 SV=1
3.	F7B7X0 Mass: 66053 Score: 268 Matches: 7(6) Sequences: 5(5) emPAI: 0.34
	Keratin 1 OS=Equus caballus OX=9796 GN=KRT1 PE=3 SV=1
	Query	Observed	Mr(expt)	Mr(calc)	ppm	Miss	Score	Expect	Rank	Unique	Peptide
	445	517.2595	1032.5045	1032.5087	-4.10	0	73	7e-006	1	U	R.TLLEGEESR.M
	475	533.2596	1064.5047	1064.5138	-8.52	0	36	0.022	1	U	R.AQYEDIAQK.S
	654	633.3196	1264.6246	1264.6299	-4.19	0	80	1.1e-006	1	U	R.TNAENEFVTIK.K
	818	465.2489	1392.7250	1392.7249	0.07	1	(28)	0.16	1	U	R.TNAENEFVTIKK.D
	819	697.3699	1392.7252	1392.7249	0.23	1	48	0.0014	1	U	R.TNAENEFVTIKK.D
	897	738.3942	1474.7739	1474.7780	-2.77	0	85	3.5e-007	1		R.FLEQQNQVLQTK.W 898
4.	F7DYB1 Mass: 57329 Score: 233 Matches: 7(4) Sequences: 5(3) emPAI: 0.40
	Alpha-amylase OS=Equus caballus OX=9796 GN=LOC100049851 PE=3 SV=1
	Query	Observed	Mr(expt)	Mr(calc)	ppm	Miss	Score	Expect	Rank	Unique	Peptide
	340	449.7372	897.4599	897.4596	0.31	0	27	0.11	1	U	R.YQPISYK.I
	578	585.3575	1168.7005	1168.7067	-5.28	0	61	1.6e-005	1	U	R.VVGLLDLALEK.D
	852	714.3510	1426.6875	1426.6953	-5.51	0	95	2.9e-008	1	U	R.ALVFVDNHDNQR.G
	853	476.5745	1426.7017	1426.6953	4.43	0	(48)	0.0015	1	U	R.ALVFVDNHDNQR.G
	941	524.5613	1570.6622	1570.6682	-3.81	1	57	8.9e-005	1	U	R.SGNEDEFRDMVTR.C 940
	1025	577.2799	1728.8179	1728.8116	3.62	0	28	0.15	1	U	K.MAVGFMLAHPYGFTR.I
5.	F6RDD3 Mass: 16129 Score: 184 Matches: 6(4) Sequences: 6(4) emPAI: 1.60
	Globin A1 OS=Equus caballus OX=9796 GN=HBB PE=3 SV=1
	Query	Observed	Mr(expt)	Mr(calc)	ppm	Miss	Score	Expect	Rank	Unique	Peptide
	531	563.7835	1125.5525	1125.5567	-3.77	0	26	0.19	1	U	K.LHVDPENFR.L
	557	575.3403	1148.6660	1148.6666	-0.51	0	66	6.9e-006	1	U	K.VVAGVANALAHK.Y
	655	633.4124	1264.8102	1264.8231	-10.23	0	13	0.097	1	U	R.LLGNVLVVVLAR.H
	660	637.8622	1273.7099	1273.7183	-6.56	0	56	0.00014	1	U	R.LLVVYPWTQR.F
	771	679.8286	1357.6426	1357.6474	-3.54	0	54	0.00032	1	U	K.VNEEEVGGEALGR.L
	850	713.8434	1425.6723	1425.6776	-3.69	0	74	4e-006	1	U	K.DFTPELQASYQK.V
	Proteins matching the same set of peptides:
	P02062 Mass: 15998 Score: 184 Matches: 6(4) Sequences: 6(4)
	Hemoglobin subunit beta OS=Equus caballus OX=9796 GN=HBB PE=1 SV=1
6.	F7DXM5 Mass: 46844 Score: 173 Matches: 4(4) Sequences: 4(4) emPAI: 0.31
	Uncharacterized protein OS=Equus caballus OX=9796 GN=LOC100065068 PE=3 SV=1
	Query	Observed	Mr(expt)	Mr(calc)	ppm	Miss	Score	Expect	Rank	Unique	Peptide
	223	374.2235	746.4325	746.4327	-0.20	0	35	0.015	1		K.SPLFVGK.V
	376	478.7547	955.4949	955.4975	-2.66	0	30	0.048	1		R.HLEDTLTK.G
	653	422.2301	1263.6686	1263.6724	-3.04	0	32	0.046	1		R.HSSFVNVHLPK.L
	1033	879.9568	1757.8991	1757.9047	-3.16	0	140	9.2e-013	1	U	R.QADLSGITEEAPLTVSK.A
7.	F7AAK7 Mass: 41766 Score: 156 Matches: 5(5) Sequences: 4(4) emPAI: 0.46
	Actin gamma 1 OS=Equus caballus OX=9796 GN=ACTG1 PE=3 SV=1
	Query	Observed	Mr(expt)	Mr(calc)	ppm	Miss	Score	Expect	Rank	Unique	Peptide
	393	488.7245	975.4345	975.4410	-6.69	0	58	9.2e-005	1	U	K.AGFAGDDAPR.A
	539	566.7656	1131.5167	1131.5197	-2.61	0	45	0.0019	1	U	R.GYSFTTTAER.E
	572	581.3082	1160.6018	1160.6111	-8.01	0	45	0.0041	1	U	K.EITALAPSTMK.I
	585	589.3092	1176.6039	1176.6060	-1.82	0	(44)	0.0048	1	U	K.EITALAPSTMK.I
	1091	652.0244	1953.0514	1953.0571	-2.91	0	69	5.9e-006	1	U	R.VAPEEHPVLLTEAPLNPK.A
	Proteins matching the same set of peptides:
	P60708 Mass: 41710 Score: 156 Matches: 5(5) Sequences: 4(4)
	Actin, cytoplasmic 1 OS=Equus caballus OX=9796 GN=ACTB PE=2 SV=1
8.	F6WGX6 Mass: 62957 Score: 147 Matches: 3(3) Sequences: 2(2) emPAI: 0.11
	Keratin 77 OS=Equus caballus OX=9796 GN=KRT77 PE=3 SV=1
	Query	Observed	Mr(expt)	Mr(calc)	ppm	Miss	Score	Expect	Rank	Unique	Peptide
	896	738.3755	1474.7365	1474.7416	-3.43	0	62	7e-005	1	U	K.WELLQQVDTSTR.T
	897	738.3942	1474.7739	1474.7780	-2.77	0	85	3.5e-007	1		R.FLEQQNQVLQTK.W 898
9.	F6SHJ8 Mass: 61290 Score: 146 Matches: 3(3) Sequences: 2(2) emPAI: 0.11
	Uncharacterized protein OS=Equus caballus OX=9796 PE=3 SV=1
	Query	Observed	Mr(expt)	Mr(calc)	ppm	Miss	Score	Expect	Rank	Unique	Peptide
	616	604.8134	1207.6122	1207.6085	3.06	0	60	9.5e-005	1	U	R.TAAENDFVTLK.K
	897	738.3942	1474.7739	1474.7780	-2.77	0	85	3.5e-007	1		R.FLEQQNQVLQTK.W 898
	Proteins matching the same set of peptides:
	F7A559 Mass: 62690 Score: 146 Matches: 3(3) Sequences: 2(2)
	Uncharacterized protein OS=Equus caballus OX=9796 PE=3 SV=1
	F7AAI4 Mass: 52384 Score: 146 Matches: 3(3) Sequences: 2(2)
	Uncharacterized protein OS=Equus caballus OX=9796 PE=3 SV=1
	F7AN17 Mass: 63335 Score: 146 Matches: 3(3) Sequences: 2(2)
	Uncharacterized protein OS=Equus caballus OX=9796 PE=3 SV=1
	F7BP93 Mass: 56773 Score: 146 Matches: 3(3) Sequences: 2(2)
	Uncharacterized protein OS=Equus caballus OX=9796 PE=3 SV=1
10.	F7CYR1 Mass: 52337 Score: 128 Matches: 5(3) Sequences: 4(3) emPAI: 0.36
	Serpin family C member 1 OS=Equus caballus OX=9796 GN=SERPINC1 PE=3 SV=1
	Query	Observed	Mr(expt)	Mr(calc)	ppm	Miss	Score	Expect	Rank	Unique	Peptide
	532	563.8303	1125.6461	1125.6506	-4.00	1	52	0.00018	1	U	K.SKLPGIVAEGR.S
	666	641.3077	1280.6009	1280.6037	-2.18	0	54	0.00037	1	U	R.SDLYVSDAFHK.A
	741	447.5585	1339.6536	1339.6561	-1.87	0	34	0.033	1	U	K.TSDQIHFFFAK.L
	742	670.8354	1339.6563	1339.6561	0.19	0	(29)	0.12	1	U	K.TSDQIHFFFAK.L
	1066	625.6287	1873.8643	1873.8653	-0.53	1	24	0.4	1	U	K.ATEDEGSEQKIPEATNR.R
11.	F7CSL8 Mass: 46896 Score: 93 Matches: 4(3) Sequences: 4(3) emPAI: 0.31
	Uncharacterized protein OS=Equus caballus OX=9796 PE=3 SV=1
	Query	Observed	Mr(expt)	Mr(calc)	ppm	Miss	Score	Expect	Rank	Unique	Peptide
	223	374.2235	746.4325	746.4327	-0.20	0	35	0.015	1		K.SPLFVGK.V
	376	478.7547	955.4949	955.4975	-2.66	0	30	0.048	1		R.HLEDTLTK.G
	543	567.3198	1132.6251	1132.6240	0.93	0	28	0.11	1		K.GILATFLENR.H
	773	680.3687	1358.7228	1357.7201	738	0	70	9.6e-006	1	U	K.GTEAAGATIVEAIR.T
12.	F6ZND8 Mass: 59832 Score: 80 Matches: 2(2) Sequences: 2(2) emPAI: 0.11
	Uncharacterized protein OS=Equus caballus OX=9796 GN=KRT6C PE=3 SV=1
	Query	Observed	Mr(expt)	Mr(calc)	ppm	Miss	Score	Expect	Rank	Unique	Peptide
	514	554.2775	1106.5405	1106.5356	4.43	0	42	0.0097	1	U	K.AQYEEIAQR.S
	692	651.8595	1301.7044	1301.7078	-2.60	0	66	2.2e-005	1		R.SLDLDSIIAEVK.A
	Proteins matching the same set of peptides:
	F7AGY4 Mass: 60145 Score: 80 Matches: 2(2) Sequences: 2(2)
	Uncharacterized protein OS=Equus caballus OX=9796 PE=3 SV=1
	F7D281 Mass: 59851 Score: 80 Matches: 2(2) Sequences: 2(2)
	Uncharacterized protein OS=Equus caballus OX=9796 GN=KRT6B PE=3 SV=1
13.	F6W7V0 Mass: 62397 Score: 71 Matches: 2(2) Sequences: 2(2) emPAI: 0.11
	Keratin 5 OS=Equus caballus OX=9796 GN=KRT5 PE=3 SV=1
	Query	Observed	Mr(expt)	Mr(calc)	ppm	Miss	Score	Expect	Rank	Unique	Peptide
	599	597.7895	1193.5644	1193.5676	-2.69	0	33	0.052	1	U	K.YEELQQTAGR.H
	692	651.8595	1301.7044	1301.7078	-2.60	0	66	2.2e-005	1		R.SLDLDSIIAEVK.A
14.	F6ZEQ3 Mass: 50796 Score: 65 Matches: 4(3) Sequences: 4(3) emPAI: 0.29
	Keratin 16 OS=Equus caballus OX=9796 GN=KRT16 PE=3 SV=1
	Query	Observed	Mr(expt)	Mr(calc)	ppm	Miss	Score	Expect	Rank	Unique	Peptide
	250	404.2036	806.3926	806.3923	0.36	0	38	0.018	1		R.LAADDFR.T
	255	405.2241	808.4337	808.4330	0.80	0	35	0.016	1		R.LASYLDK.V
	442	515.2983	1028.5820	1028.5866	-4.46	0	42	0.0048	1	U	R.VLDELTLAR.T
	611	601.8146	1201.6146	1201.5939	17.3	0	27	0.19	1		R.QSVEADINGLR.R
15.	F7BF31 Mass: 46874 Score: 65 Matches: 5(3) Sequences: 5(3) emPAI: 0.41
	Uncharacterized protein OS=Equus caballus OX=9796 GN=SPI2 PE=3 SV=1
	Query	Observed	Mr(expt)	Mr(calc)	ppm	Miss	Score	Expect	Rank	Unique	Peptide
	223	374.2235	746.4325	746.4327	-0.20	0	35	0.015	1		K.SPLFVGK.V
	321	439.7520	877.4894	877.4909	-1.77	1	29	0.067	1	U	K.FLEDVKK.L
	376	478.7547	955.4949	955.4975	-2.66	0	30	0.048	1		R.HLEDTLTK.G
	543	567.3198	1132.6251	1132.6240	0.93	0	28	0.11	1		K.GILATFLENR.H
	653	422.2301	1263.6686	1263.6724	-3.04	0	32	0.046	1		R.HSSFVNVHLPK.L
16.	F7DJZ1 Mass: 51400 Score: 61 Matches: 3(2) Sequences: 3(2) emPAI: 0.20
	BPI fold containing family B member 1 OS=Equus caballus OX=9796 GN=BPIFB1 PE=4 SV=1
	Query	Observed	Mr(expt)	Mr(calc)	ppm	Miss	Score	Expect	Rank	Unique	Peptide
	358	465.7724	929.5303	929.5368	-6.99	0	42	0.0053	1	U	R.LPLLSTMR.E
	542	567.3129	1132.6113	1132.6162	-4.32	0	45	0.0026	1	U	K.LSSGIPVSMVK.A
	690	434.5818	1300.7236	1300.7252	-1.18	0	25	0.25	1	U	K.HDVIQLHLQAK.L
17.	F6T323 Mass: 27112 Score: 61 Matches: 1(1) Sequences: 1(1) emPAI: 0.12
	Uncharacterized protein OS=Equus caballus OX=9796 GN=LOC100055297 PE=3 SV=1
	Query	Observed	Mr(expt)	Mr(calc)	ppm	Miss	Score	Expect	Rank	Unique	Peptide
	1151	746.3737	2236.0991	2236.1011	-0.89	0	61	9.1e-005	1	U	R.LGEYNIEVVEGNEQFINAAK.I
18.	F6XWM5 Mass: 38310 Score: 60 Matches: 3(3) Sequences: 3(3) emPAI: 0.28
	Haptoglobin OS=Equus caballus OX=9796 PE=3 SV=1
	Query	Observed	Mr(expt)	Mr(calc)	ppm	Miss	Score	Expect	Rank	Unique	Peptide
	341	450.2796	898.5447	898.5488	-4.49	0	38	0.0047	1	U	R.IIGGLLDAK.G
	396	490.7496	979.4846	979.4876	-3.05	0	35	0.026	1	U	R.VGYVSGWGR.N
	780	684.8159	1367.6172	1367.6205	-2.42	0	34	0.033	1	U	R.SEGDGVYALNSEK.Q
19.	H9GZV1 Mass: 35602 Score: 50 Matches: 2(1) Sequences: 2(1) emPAI: 0.19
	Uncharacterized protein OS=Equus caballus OX=9796 PE=4 SV=1
	Query	Observed	Mr(expt)	Mr(calc)	ppm	Miss	Score	Expect	Rank	Unique	Peptide
	621	609.3408	1216.6671	1216.6663	0.64	0	42	0.0045	1	U	K.ESQTVSITKPK.E
	1018	851.4565	1700.8984	1700.9097	-6.66	0	24	0.35	1	U	R.EPGQSVPTFAVTSLLR.V
20.	F7BRC5 Mass: 48210 Score: 47 Matches: 1(1) Sequences: 1(1) emPAI: 0.07
	Plasmalemma vesicle associated protein OS=Equus caballus OX=9796 GN=PLVAP PE=4 SV=1
	Query	Observed	Mr(expt)	Mr(calc)	ppm	Miss	Score	Expect	Rank	Unique	Peptide
	665	427.2200	1278.6381	1277.6173	799	0	47	0.0022	1	U	K.SCDALALTLNQK.I
21.	P01958 Mass: 15236 Score: 46 Matches: 3(0) Sequences: 3(0) emPAI: 0.83
	Hemoglobin subunit alpha OS=Equus caballus OX=9796 GN=HBA PE=1 SV=2
	Query	Observed	Mr(expt)	Mr(calc)	ppm	Miss	Score	Expect	Rank	Unique	Peptide
	467	529.2694	1056.5243	1056.5314	-6.77	0	27	0.12	1	U	R.MFLGFPTTK.T
	501	544.3151	1086.6157	1086.6186	-2.65	1	31	0.071	1	U	K.LRVDPVNFK.L
	656	634.8578	1267.7010	1267.7024	-1.07	0	25	0.11	1	U	K.FLSSVSTVLTSK.Y
22.	F6QAU5 Mass: 11433 Score: 41 Matches: 1(1) Sequences: 1(1) emPAI: 0.30
	Uncharacterized protein OS=Equus caballus OX=9796 PE=4 SV=1
	Query	Observed	Mr(expt)	Mr(calc)	ppm	Miss	Score	Expect	Rank	Unique	Peptide
	443	516.2593	1030.5040	1030.5083	-4.20	0	41	0.0074	1	U	K.YAASSYLTR.T
	Proteins matching the same set of peptides:
	F6SQD7 Mass: 11220 Score: 41 Matches: 1(1) Sequences: 1(1)
	Uncharacterized protein OS=Equus caballus OX=9796 PE=4 SV=1
	F7CAC5 Mass: 12224 Score: 41 Matches: 1(1) Sequences: 1(1)
	Uncharacterized protein OS=Equus caballus OX=9796 PE=4 SV=1
23.	F7D7M7 Mass: 54010 Score: 38 Matches: 2(1) Sequences: 2(1) emPAI: 0.13
	Uncharacterized protein OS=Equus caballus OX=9796 PE=4 SV=1
	Query	Observed	Mr(expt)	Mr(calc)	ppm	Miss	Score	Expect	Rank	Unique	Peptide
	490	541.3099	1080.6052	1080.6179	-11.74	0	30	0.039	1	U	R.EQGLPLPSIK.G
	732	665.3790	1328.7434	1328.7551	-8.84	0	27	0.14	1	U	R.LDLSLVGDLLSGK.S
24.	A0A0B4J1C4 Mass: 17841 Score: 34 Matches: 1(1) Sequences: 1(1) emPAI: 0.19
	Joining chain of multimeric IgA and IgM OS=Equus caballus OX=9796 GN=JCHAIN PE=4 SV=1
	Query	Observed	Mr(expt)	Mr(calc)	ppm	Miss	Score	Expect	Rank	Unique	Peptide
	474	532.2862	1062.5578	1062.5710	-12.36	0	34	0.042	1	U	R.VPLTYGGQTK.I
25.	F7DMT7 Score: 32 Matches: 2(1) Sequences: 1(1) emPAI: 0.06
	Importin subunit alpha OS=Equus caballus OX=9796 GN=KPNA5 PE=3 SV=1
	Query	Observed	Mr(expt)	Mr(calc)	ppm	Miss	Score	Expect	Rank	Unique	Peptide
	280	421.7586	841.5027	840.4930	1201	1	32	0.022	1	U	R.RNVSLPR.N 279
26.	F6U4X2 Score: 28 Matches: 1(0) Sequences: 1(0) emPAI: 0.05
	Alpha-fetoprotein OS=Equus caballus OX=9796 GN=AFP PE=4 SV=1
	Query	Observed	Mr(expt)	Mr(calc)	ppm	Miss	Score	Expect	Rank	Unique	Peptide
	357	464.2486	926.4826	926.4861	-3.83	0	28	0.085	1	U	R.YLYEIAR.R
	Proteins matching the same set of peptides:
	P49066 Score: 28 Matches: 1(0) Sequences: 1(0)
	Alpha-fetoprotein OS=Equus caballus OX=9796 GN=AFP PE=2 SV=1
27.	F6R1I4 Mass: 9679 Score: 22 Matches: 1(0) Sequences: 1(0) emPAI: 0.36
	Uteroglobin OS=Equus caballus OX=9796 GN=SCGB1A1 PE=4 SV=1
	Query	Observed	Mr(expt)	Mr(calc)	ppm	Miss	Score	Expect	Rank	Unique	Peptide
	359	466.7732	931.5319	931.5379	-6.42	0	22	0.36	1	U	K.TLVDFLPK.N
	Proteins matching the same set of peptides:
	F6ZSQ2 Mass: 9694 Score: 22 Matches: 1(0) Sequences: 1(0)
	Uteroglobin OS=Equus caballus OX=9796 GN=SCGB1A1 PE=4 SV=1
	F7B739 Mass: 9635 Score: 22 Matches: 1(0) Sequences: 1(0)
	Uncharacterized protein OS=Equus caballus OX=9796 PE=4 SV=1
	Q8MKG2 Mass: 9667 Score: 22 Matches: 1(0) Sequences: 1(0)
	Uteroglobin OS=Equus caballus OX=9796 GN=SCGB1A1 PE=2 SV=2
28.	F6RMD0 Mass: 85930 Score: 21 Matches: 1(0) Sequences: 1(0) emPAI: 0.04
	Uncharacterized protein OS=Equus caballus OX=9796 GN=CFB PE=3 SV=1
	Query	Observed	Mr(expt)	Mr(calc)	ppm	Miss	Score	Expect	Rank	Unique	Peptide
	619	606.3282	1210.6418	1210.6598	-14.83	0	21	0.47	1	U	R.YGLVTYATVPK.V
Mascot: http://www.matrixscience.com/

## Sheet: Sample 1 DTT treated
Mascot Search Results
Search title : Uniprot_Horse_25ppm-05Da
MS data file : 56294995342143262.mgf
Database : Uniprot-Horse UP000002281-25-02-2019 (22705 sequences; 12757064 residues)
Timestamp : 5 Apr 2019 at 16:52:17 GMT
Enzyme : Trypsin
Variable modifications : Carbamidomethyl (C),Deamidated (NQ),Oxidation (M)
Mass values : Monoisotopic
Protein Mass : Unrestricted
Peptide Mass Tolerance : ± 25 ppm (# 13C = 1)
Fragment Mass Tolerance: ± 0.06 Da
Max Missed Cleavages : 1
Instrument type : ESI-QUAD-TOF
Number of queries : 6357
Protein hits :	F7BAY6	Serum albumin OS=Equus caballus OX=9796 GN=ALB PE=4 SV=1
	F7DYB1	Alpha-amylase OS=Equus caballus OX=9796 GN=LOC100049851 PE=3 SV=1
	F6RDD3	Globin A1 OS=Equus caballus OX=9796 GN=HBB PE=3 SV=1
	P27425	Serotransferrin OS=Equus caballus OX=9796 GN=TF PE=2 SV=1
	F6W1N4	Uncharacterized protein OS=Equus caballus OX=9796 GN=PIGR PE=4 SV=1
	P01958	Hemoglobin subunit alpha OS=Equus caballus OX=9796 GN=HBA PE=1 SV=2
	F7BLE3	Uncharacterized protein OS=Equus caballus OX=9796 PE=4 SV=1
	Q2TU62	Calcium-activated chloride channel regulator 1 OS=Equus caballus OX=9796 GN=CLCA1 PE=1 SV=1
	F7BTW7	Uncharacterized protein OS=Equus caballus OX=9796 GN=LOC100060539 PE=4 SV=1
	F6X1X3	Vitelline membrane outer layer 1 homolog OS=Equus caballus OX=9796 GN=VMO1 PE=4 SV=1
	H9GZT5	Uncharacterized protein OS=Equus caballus OX=9796 PE=4 SV=1
	H9GZU9	Uncharacterized protein OS=Equus caballus OX=9796 PE=4 SV=1
	F6SJK9	Uncharacterized protein OS=Equus caballus OX=9796 PE=3 SV=1
	F7DJZ1	BPI fold containing family B member 1 OS=Equus caballus OX=9796 GN=BPIFB1 PE=4 SV=1
	F6RMD0	Uncharacterized protein OS=Equus caballus OX=9796 GN=CFB PE=3 SV=1
	F6RI47	Alpha-2-macroglobulin OS=Equus caballus OX=9796 GN=A2M PE=4 SV=1
	H9GZQ9	Uncharacterized protein OS=Equus caballus OX=9796 PE=4 SV=1
	F7CPJ5	Uncharacterized protein OS=Equus caballus OX=9796 GN=LOC100053601 PE=3 SV=1
	H9GZV1	Uncharacterized protein OS=Equus caballus OX=9796 PE=4 SV=1
	F6XWM5	Haptoglobin OS=Equus caballus OX=9796 PE=3 SV=1
	F6VE37	Uncharacterized protein OS=Equus caballus OX=9796 GN=LOC100054161 PE=3 SV=1
	F6ZEQ3	Keratin 16 OS=Equus caballus OX=9796 GN=KRT16 PE=3 SV=1
	F6V5H1	Immunoglobulin kappa constant OS=Equus caballus OX=9796 GN=IGKC PE=4 SV=1
	F6Z2L5	Apolipoprotein A1 OS=Equus caballus OX=9796 GN=APOA1 PE=3 SV=1
	F6T3Y8	Actin, cytoplasmic 1 OS=Equus caballus OX=9796 GN=ACTB PE=3 SV=1
	F7CZ92	Actin, alpha skeletal muscle OS=Equus caballus OX=9796 GN=ACTA1 PE=2 SV=1
	H9GZU8	Uncharacterized protein OS=Equus caballus OX=9796 PE=4 SV=1
	A0A0B4J1C4	Joining chain of multimeric IgA and IgM OS=Equus caballus OX=9796 GN=JCHAIN PE=4 SV=1
	F6PJX6	Keratin 13 OS=Equus caballus OX=9796 GN=KRT13 PE=3 SV=1
	F7CSL8	Uncharacterized protein OS=Equus caballus OX=9796 PE=3 SV=1
	F7ATL5	Keratin 14 OS=Equus caballus OX=9796 GN=KRT14 PE=3 SV=1
	F7DJE3	Surfactant protein D OS=Equus caballus OX=9796 GN=SFTPD PE=4 SV=1
	F6QAU5	Uncharacterized protein OS=Equus caballus OX=9796 PE=4 SV=1
	F7DXM5	Uncharacterized protein OS=Equus caballus OX=9796 GN=LOC100065068 PE=3 SV=1
	F7CT65	Uncharacterized protein OS=Equus caballus OX=9796 GN=LOC100034197 PE=3 SV=1
	F7B7X0	Keratin 1 OS=Equus caballus OX=9796 GN=KRT1 PE=3 SV=1
	F6W7V0	Keratin 5 OS=Equus caballus OX=9796 GN=KRT5 PE=3 SV=1
	F6T0P6	GC, vitamin D binding protein OS=Equus caballus OX=9796 GN=GC PE=4 SV=1
	F6VJR6	Alpha-1B-glycoprotein OS=Equus caballus OX=9796 GN=A1BG PE=4 SV=1
	F6TIR2	Lipocalin 2 OS=Equus caballus OX=9796 GN=LCN2 PE=3 SV=1
	F7DIB3	SEC14 like lipid binding 3 OS=Equus caballus OX=9796 GN=SEC14L3 PE=4 SV=1
	F6YIA9	Uncharacterized protein OS=Equus caballus OX=9796 GN=KRT17 PE=3 SV=1
	F7CAC5	Uncharacterized protein OS=Equus caballus OX=9796 PE=4 SV=1
	F6SHJ8	Uncharacterized protein OS=Equus caballus OX=9796 PE=3 SV=1
	F7ASU6	Selenium binding protein 1 OS=Equus caballus OX=9796 GN=SELENBP1 PE=4 SV=1
	F7CKH3	Retinal dehydrogenase 1 OS=Equus caballus OX=9796 GN=ALDH1A1 PE=3 SV=1
	F6ZXQ2	Uncharacterized protein OS=Equus caballus OX=9796 PE=3 SV=1
	F7D7M7	Uncharacterized protein OS=Equus caballus OX=9796 PE=4 SV=1
	H9GZS9	Uncharacterized protein OS=Equus caballus OX=9796 PE=4 SV=1
	F6XS73	Chromosome 13 C16orf89 homolog OS=Equus caballus OX=9796 GN=C13H16orf89 PE=4 SV=1
	F6ZI51	Annexin OS=Equus caballus OX=9796 GN=ANXA2 PE=2 SV=1
	F6Z129	Vanin 1 OS=Equus caballus OX=9796 GN=VNN1 PE=4 SV=1
	F7AUX9	Pulmonary surfactant-associated protein A OS=Equus caballus OX=9796 GN=SFTPA1 PE=4 SV=1
	F6PQ46	Ceruloplasmin OS=Equus caballus OX=9796 GN=CP PE=3 SV=1
	F7C450	Alpha 2-HS glycoprotein OS=Equus caballus OX=9796 GN=AHSG PE=4 SV=1
	F7BF31	Uncharacterized protein OS=Equus caballus OX=9796 GN=SPI2 PE=3 SV=1
	H9GZN9	Immunoglobulin heavy constant mu OS=Equus caballus OX=9796 GN=IGHM PE=4 SV=1
	F7DYC4	Uncharacterized protein OS=Equus caballus OX=9796 GN=SFTPB PE=4 SV=1
	P38029	Alpha-1-antiproteinase 2 OS=Equus caballus OX=9796 PE=1 SV=2
	F6ZND8	Uncharacterized protein OS=Equus caballus OX=9796 GN=KRT6C PE=3 SV=1
	F6UP52	Myosin heavy chain 8 OS=Equus caballus OX=9796 GN=MYH8 PE=3 SV=1
	F6ZBG0	Carbonic anhydrase 1 OS=Equus caballus OX=9796 GN=CA1 PE=4 SV=1
	F6S6J4	Uncharacterized protein OS=Equus caballus OX=9796 GN=PRDX1 PE=4 SV=1
	F6QP34	WAP four-disulfide core domain 2 OS=Equus caballus OX=9796 GN=WFDC2 PE=4 SV=1
	F6SQD7	Uncharacterized protein OS=Equus caballus OX=9796 PE=4 SV=1
	F6UL68	Transthyretin OS=Equus caballus OX=9796 GN=TTR PE=3 SV=1
	F7BFT1	Peroxiredoxin 2 OS=Equus caballus OX=9796 GN=PRDX2 PE=4 SV=1
	F6SP11	Uncharacterized protein OS=Equus caballus OX=9796 PE=4 SV=1
	F6WGX6	Keratin 77 OS=Equus caballus OX=9796 GN=KRT77 PE=3 SV=1
	Q8HZM6	Annexin A1 OS=Equus caballus OX=9796 GN=ANXA1 PE=2 SV=3
	F6S8W6	Keratin 75 OS=Equus caballus OX=9796 GN=KRT75 PE=3 SV=1
	F7CYR1	Serpin family C member 1 OS=Equus caballus OX=9796 GN=SERPINC1 PE=3 SV=1
	F6ZSQ2	Uteroglobin OS=Equus caballus OX=9796 GN=SCGB1A1 PE=4 SV=1
	F6VSN2	Uncharacterized protein OS=Equus caballus OX=9796 GN=LOC100053249 PE=4 SV=1
	F6XZQ1	Calcyphosine OS=Equus caballus OX=9796 GN=CAPS PE=4 SV=1
	F7D7M0	Galectin 3 binding protein OS=Equus caballus OX=9796 GN=LGALS3BP PE=4 SV=1
	F7D2D9	Biliverdin reductase B OS=Equus caballus OX=9796 GN=BLVRB PE=4 SV=1
	F6R3X8	Brain abundant membrane attached signal protein 1 OS=Equus caballus OX=9796 GN=BASP1 PE=4 SV=1
	F6WXH5	Ferritin OS=Equus caballus OX=9796 GN=LOC111767398 PE=3 SV=1
	F6ZI08	Tetraspanin OS=Equus caballus OX=9796 GN=TSPAN1 PE=3 SV=1
	F6TJS5	Uncharacterized protein OS=Equus caballus OX=9796 PE=4 SV=1
	A2Q0Z1	Heat shock cognate 71 kDa protein OS=Equus caballus OX=9796 GN=HSPA8 PE=2 SV=1
	F6XLB1	Lactotransferrin OS=Equus caballus OX=9796 GN=LTF PE=3 SV=1
	P00443	Superoxide dismutase [Cu-Zn] OS=Equus caballus OX=9796 GN=SOD1 PE=1 SV=2
	F6R810	Tubulin alpha chain OS=Equus caballus OX=9796 GN=LOC100052388 PE=3 SV=1
	F6USP9	Plasminogen OS=Equus caballus OX=9796 GN=PLG PE=3 SV=1
	P05619	Leukocyte elastase inhibitor OS=Equus caballus OX=9796 GN=SERPINB1 PE=1 SV=3
	F7CU94	Lysozyme OS=Equus caballus OX=9796 GN=LYZ PE=2 SV=1
	F7DZV9	Tyrosine 3-monooxygenase/tryptophan 5-monooxygenase activation protein beta OS=Equus caballus OX=9796 GN=YWHAB PE=3 SV=1
	F6XSF7	Uncharacterized protein OS=Equus caballus OX=9796 GN=LOC100059239 PE=4 SV=1
	F6QD28	Tubulin beta chain OS=Equus caballus OX=9796 PE=3 SV=1
	F7DHZ1	Gelsolin OS=Equus caballus OX=9796 GN=GSN PE=4 SV=1
	F6RZ56	Uncharacterized protein OS=Equus caballus OX=9796 PE=3 SV=1
	F6PNY0	Uncharacterized protein OS=Equus caballus OX=9796 PE=4 SV=1
	F7APU2	Uncharacterized protein OS=Equus caballus OX=9796 PE=3 SV=1
	F6UDZ6	Uncharacterized protein OS=Equus caballus OX=9796 PE=4 SV=1
	F6YNH6	Cathepsin B OS=Equus caballus OX=9796 GN=CTSB PE=3 SV=1
	F7D854	Catalase OS=Equus caballus OX=9796 GN=CAT PE=3 SV=1
	Q29482	Clusterin OS=Equus caballus OX=9796 GN=CLU PE=2 SV=1
	F6PVG3	EGF containing fibulin extracellular matrix protein 1 OS=Equus caballus OX=9796 GN=EFEMP1 PE=4 SV=1
	F6R7J2	Isocitrate dehydrogenase [NADP] OS=Equus caballus OX=9796 GN=IDH1 PE=3 SV=1
	F6RGN2	Fatty acid binding protein 5 OS=Equus caballus OX=9796 GN=FABP5 PE=3 SV=1
	F6SPT8	Lipocalin 15 OS=Equus caballus OX=9796 GN=LCN15 PE=3 SV=1
	F6SX98	Fructose-bisphosphate aldolase OS=Equus caballus OX=9796 GN=ALDOA PE=3 SV=1
	F6UUF5	Anion exchange protein OS=Equus caballus OX=9796 GN=SLC4A1 PE=3 SV=1
	F6WA57	Lymphocyte cytosolic protein 1 OS=Equus caballus OX=9796 GN=LCP1 PE=4 SV=1
	F6WIP4	Lipocalin 1 OS=Equus caballus OX=9796 GN=LCN1 PE=3 SV=1
	F6XEB4	Tyrosine 3-monooxygenase/tryptophan 5-monooxygenase activation protein zeta OS=Equus caballus OX=9796 GN=YWHAZ PE=3 SV=1
	F6YV40	Glyceraldehyde-3-phosphate dehydrogenase OS=Equus caballus OX=9796 GN=GAPDH PE=3 SV=1
	F6ZWS7	Uncharacterized protein OS=Equus caballus OX=9796 GN=LOC100050760 PE=4 SV=1
	F7ATS5	Golgi membrane protein 1 OS=Equus caballus OX=9796 GN=GOLM1 PE=4 SV=1
	F7B3I5	Afamin OS=Equus caballus OX=9796 GN=AFM PE=4 SV=1
	F7BJD8	Cathepsin H OS=Equus caballus OX=9796 GN=CTSH PE=3 SV=1
	F7BND9	Protein S100 OS=Equus caballus OX=9796 GN=S100A11 PE=3 SV=1
	F7CN05	Fibronectin OS=Equus caballus OX=9796 GN=FN1 PE=4 SV=1
	F7CTJ3	Inter-alpha-trypsin inhibitor heavy chain 2 OS=Equus caballus OX=9796 GN=ITIH2 PE=4 SV=1
	F7DS45	Membrane spanning 4-domains A8 OS=Equus caballus OX=9796 GN=MS4A8 PE=4 SV=1
	P02791	Ferritin light chain OS=Equus caballus OX=9796 GN=FTL PE=1 SV=4
	F7BNQ2	Complement component 4 binding protein alpha OS=Equus caballus OX=9796 GN=C4BPA PE=4 SV=1
	F6TZS9	Triosephosphate isomerase OS=Equus caballus OX=9796 GN=TPI1 PE=3 SV=1
	F6ZXW9	Uncharacterized protein OS=Equus caballus OX=9796 PE=4 SV=1
	F6VY00	Uncharacterized protein OS=Equus caballus OX=9796 PE=3 SV=1
	F7CIW5	NPC intracellular cholesterol transporter 2 OS=Equus caballus OX=9796 GN=NPC2 PE=4 SV=1
	F6TEI8	Profilin OS=Equus caballus OX=9796 PE=3 SV=1
	F6ZI35	Uncharacterized protein OS=Equus caballus OX=9796 PE=4 SV=1
	F6V1T9	Junction plakoglobin OS=Equus caballus OX=9796 GN=JUP PE=4 SV=1
	F6SP74	Complement factor properdin OS=Equus caballus OX=9796 GN=CFP PE=4 SV=1
	F7BFJ1	Prothrombin OS=Equus caballus OX=9796 GN=F2 PE=3 SV=1
	F6U4X2	Alpha-fetoprotein OS=Equus caballus OX=9796 GN=AFP PE=4 SV=1
	F6PJ64	Uncharacterized protein OS=Equus caballus OX=9796 PE=3 SV=1
	P30441	Beta-2-microglobulin OS=Equus caballus OX=9796 GN=B2M PE=1 SV=1
	F7ALV0	Thioredoxin OS=Equus caballus OX=9796 GN=TXN PE=4 SV=1
	F6RLD7	Glutathione S-transferase omega 2 OS=Equus caballus OX=9796 GN=GSTO2 PE=3 SV=1
	F6VIZ0	Uncharacterized protein OS=Equus caballus OX=9796 PE=4 SV=1
	F6XA04	Tyrosine 3-monooxygenase/tryptophan 5-monooxygenase activation protein epsilon OS=Equus caballus OX=9796 GN=YWHAE PE=3 SV=1
	F6YY66	Nucleoside diphosphate kinase OS=Equus caballus OX=9796 GN=NME1-NME2 PE=3 SV=1
	F7CR03	Phospholipid transfer protein OS=Equus caballus OX=9796 GN=PLTP PE=4 SV=1
	Q9GKX7	Heat shock protein HSP 90-alpha OS=Equus caballus OX=9796 GN=HSP90AA1 PE=2 SV=2
	F6Y2Q4	Creatine kinase B OS=Equus caballus OX=9796 GN=CKB PE=3 SV=1
	F6RHE9	Uncharacterized protein OS=Equus caballus OX=9796 GN=SYNE1 PE=4 SV=1
	F6YS25	Carbonic anhydrase 2 OS=Equus caballus OX=9796 GN=CA2 PE=4 SV=1
	F6QXW2	Phosphatidylethanolamine binding protein 1 OS=Equus caballus OX=9796 GN=PEBP1 PE=4 SV=1
	F6R6Z6	Epithelial cell adhesion molecule OS=Equus caballus OX=9796 GN=EPCAM PE=4 SV=1
	F7AEK5	Alkaline phosphatase, liver/bone/kidney OS=Equus caballus OX=9796 GN=ALPL PE=3 SV=1
	F6VG02	Titin OS=Equus caballus OX=9796 GN=TTN PE=4 SV=1
	F7D9J2	Transketolase OS=Equus caballus OX=9796 GN=TKT PE=4 SV=1
	F6RA82	Pappalysin 1 OS=Equus caballus OX=9796 GN=PAPPA PE=4 SV=1
	A0A0B4J1C5	Uncharacterized protein OS=Equus caballus OX=9796 GN=UBA52 PE=4 SV=1
	F7DS76	Uncharacterized protein OS=Equus caballus OX=9796 PE=4 SV=1
	F6RC31	N-sulfoglucosamine sulfohydrolase OS=Equus caballus OX=9796 GN=SGSH PE=4 SV=1
	Uniprot-Horse	Decoy	False discovery rate
Peptide matches above identity threshold	1396	8	0.0057
Select Summary Report (scores adjusted by Percolator)
			Help
	Significance threshold p<	Max. number of hits	Show Percolator scores
	Standard scoring MudPIT scoring	Ions score or expect cut-off	Show sub-sets
	Show pop-ups Suppress pop-ups		Require bold red
	Preferred taxonomy
All queries Unassigned Below homology threshold Below identity threshold
1.	F7BAY6 Mass: 68328 Score: 16674 Matches: 159(148) Sequences: 47(43) emPAI: 20.11
	Serum albumin OS=Equus caballus OX=9796 GN=ALB PE=4 SV=1
	Query	Observed	Mr(expt)	Mr(calc)	ppm	Miss	Score	Expect	Rank	Unique	Peptide
	552	395.2394	788.4643	788.4644	-0.05	0	32	0.00067	1		K.IVTDLTK.V 550 553 554
	783	457.2401	912.4657	912.4705	-5.21	0	11	0.083	1		K.YLYEVAR.R 784
	882	477.7419	953.4693	953.4706	-1.28	0	15	0.029	1		K.TYEATLEK.C
	888	479.7860	957.5573	957.5495	8.23	0	42	6.1e-005	1		K.QSALAELVK.H 887
	1019	339.8478	1016.5215	1016.5291	-7.47	0	(32)	0.00067	1		K.SLHTLFGDK.L 1022
	1020	509.2695	1016.5245	1016.5291	-4.51	0	(154)	3.9e-016	1		K.SLHTLFGDK.L 1021 1023 1024
	1220	543.8262	1085.6379	1085.6444	-6.00	1	14	0.036	1		K.KQSALAELVK.H
	1385	569.2493	1136.4840	1136.4808	2.80	0	(154)	3.9e-016	1		K.EACFAEEGPK.L 1384 1386
	1428	575.3092	1148.6039	1148.6077	-3.37	0	148	1.6e-015	1		K.LVNEVTEFAK.K 1429
	1435	575.8008	1149.5871	1149.5917	-4.00	0	(63)	5.5e-007	1		K.LVNEVTEFAK.K
	1577	398.5375	1192.5906	1192.5949	-3.58	1	10	0.089	1		R.DTHKSEIAHR.F
	1691	616.2578	1230.5009	1230.5088	-6.36	0	154	3.9e-016	1		K.CSSFQNFGER.A 1692 1693
	1780	627.3380	1252.6615	1252.6816	-16.05	0	(154)	3.9e-016	1		K.TVLGNFSAFVAK.C 1781 1782 1783 1784
	1863	426.5706	1276.6899	1276.7027	-9.99	1	(154)	3.9e-016	1		K.LVNEVTEFAKK.C 1865
	1864	639.3573	1276.7000	1276.7027	-2.06	1	(154)	3.9e-016	1		K.LVNEVTEFAKK.C
	1948	650.3420	1298.6694	1298.6983	-22.23	0	(154)	3.9e-016	1		R.HPDYSVSLLLR.I 1949 1950
	2382	708.7925	1415.5704	1415.5697	0.50	0	(154)	3.9e-016	1		R.ATYGELADCCEK.Q 2383
	2453	714.7789	1427.5432	1427.5333	6.90	0	41	7.6e-005	1		K.ADFTECCPADDK.A 2452
	2467	718.8236	1435.6327	1435.6402	-5.23	0	(154)	3.9e-016	1		K.YICEHQDSISGK.L 2470 2471
	2469	479.5533	1435.6381	1435.6402	-1.43	0	(154)	3.9e-016	1		K.YICEHQDSISGK.L 2468 2472
	2547	485.9355	1454.7847	1454.7994	-10.07	1	(154)	3.9e-016	1		R.RHPDYSVSLLLR.I 2548 2549 2552 2553
	2550	728.4061	1454.7976	1454.7994	-1.23	1	(11)	0.083	1		R.RHPDYSVSLLLR.I 2551
	2605	734.4101	1466.8056	1466.8093	-2.49	0	(154)	3.9e-016	1		K.APQVSTPTLVEIGR.T 2606 2607
	2619	491.9319	1472.7740	1472.7843	-7.00	1	41	7.6e-005	1		K.LKACCDKPLLQK.S
	3004	798.4564	1594.8983	1594.9043	-3.74	1	(154)	3.9e-016	1		K.KAPQVSTPTLVEIGR.T 3006 3008
	3009	532.6434	1594.9085	1594.9043	2.65	1	154	3.9e-016	1		K.KAPQVSTPTLVEIGR.T 3005 3007
	3057	804.4148	1606.8150	1606.8249	-6.15	0	(154)	3.9e-016	1		R.LPCSENHLALALNR.L 3060
	3058	536.6157	1606.8253	1606.8249	0.26	0	(154)	3.9e-016	1		R.LPCSENHLALALNR.L 3061 3062
	3066	536.9440	1607.8101	1607.8089	0.72	0	(154)	3.9e-016	1		R.LPCSENHLALALNR.L 3067
	3072	805.4083	1608.8020	1608.7824	12.2	0	(154)	3.9e-016	1		K.DVFLGTFLYEYSR.R 3073
	3307	563.2648	1686.7725	1686.7784	-3.50	1	148	1.7e-015	1		K.QEPERNECFLTHK.D 3304 3306
	3479	875.3347	1748.6549	1748.6553	-0.22	0	(154)	3.9e-016	1		K.ECCHGDLLECADDR.A 3482 3484
	3480	583.8930	1748.6572	1748.6553	1.10	0	(154)	3.9e-016	1		K.ECCHGDLLECADDR.A 3481 3483
	3875	940.9577	1879.9009	1879.9138	-6.90	0	(154)	3.9e-016	1		R.RPCFSALELDEGYVPK.E 3879 3883
	3876	627.6414	1879.9022	1879.9138	-6.16	0	(154)	3.9e-016	1		R.RPCFSALELDEGYVPK.E 3880 3881
	4005	641.9991	1922.9754	1922.9414	17.7	1	4	0.37	1		K.DAKDVFLGTFLYEYSR.R
	4042	644.6747	1931.0022	1931.0299	-14.32	1	(154)	3.9e-016	1		K.SLHTLFGDKLCTVATLR.A 4043 4046
	4044	483.7602	1931.0115	1931.0299	-9.49	1	(41)	7.6e-005	1		K.SLHTLFGDKLCTVATLR.A
	4107	653.2583	1956.7531	1956.7652	-6.19	1	(154)	3.9e-016	1	U	K.CCGAEDKEACFAEEGPK.L 4110
	4108	979.3841	1956.7536	1956.7652	-5.90	1	(154)	3.9e-016	1	U	K.CCGAEDKEACFAEEGPK.L 4109
	4128	491.9861	1963.9154	1963.9210	-2.89	1	(154)	3.9e-016	1		R.NECFLTHKDDHPNLPK.L 4129
	4280	1016.4923	2030.9701	2030.9320	18.7	0	4	0.39	1		K.EDDLPSDLPALAADFAEDK.E
	4327	685.9604	2054.8595	2054.8673	-3.80	1	(154)	3.9e-016	1		R.ATYGELADCCEKQEPER.N 4328
	4329	1028.4417	2054.8687	2054.8673	0.69	1	154	3.9e-016	1		R.ATYGELADCCEKQEPER.N
	4336	686.9888	2057.9447	2057.9364	4.02	0	154	3.9e-016	1		K.LKPEPDAQCAAFQEDPDK.F
	4337	1029.9816	2057.9486	2057.9364	5.92	0	(151)	8.6e-016	1		K.LKPEPDAQCAAFQEDPDK.F
	4425	705.2958	2112.8655	2112.8775	-5.70	1	(154)	3.9e-016	1		K.VHKECCHGDLLECADDR.A 4429
	4428	529.2265	2112.8769	2112.8775	-0.31	1	(41)	7.6e-005	1		K.VHKECCHGDLLECADDR.A 4424
	4461	708.6522	2122.9348	2122.9517	-7.96	0	(154)	3.9e-016	1		K.AETFTFHADICTLPEDEK.Q 4463
	4462	1062.4790	2122.9435	2122.9517	-3.90	0	(154)	3.9e-016	1		K.AETFTFHADICTLPEDEK.Q
	4491	713.9941	2138.9606	2139.0101	-23.17	0	(154)	3.9e-016	1		R.HPYFYGPELLFHAEEYK.A 4493
	4550	723.3177	2166.9314	2166.9384	-3.23	1	(154)	3.9e-016	1	U	K.ADFTECCPADDKAGCLIPK.L 4552
	4551	1084.4739	2166.9332	2166.9384	-2.41	1	(154)	3.9e-016	1	U	K.ADFTECCPADDKAGCLIPK.L
	4709	1124.4713	2246.9281	2246.9354	-3.28	1	(154)	3.9e-016	1		K.ECCHGDLLECADDRADLAK.Y
	4710	749.9836	2246.9291	2246.9354	-2.82	1	(154)	3.9e-016	1		K.ECCHGDLLECADDRADLAK.Y 4713 4714
	4711	562.7401	2246.9313	2246.9354	-1.82	1	(154)	3.9e-016	1		K.ECCHGDLLECADDRADLAK.Y 4712 4715
	4788	762.3708	2284.0905	2284.1198	-12.80	1	154	3.9e-016	1		R.RPCFSALELDEGYVPKEFK.A 4789
	4809	574.7833	2295.1040	2295.1113	-3.18	1	154	3.9e-016	1		R.RHPYFYGPELLFHAEEYK.A 4805 4808 4810 4813
	4867	773.7305	2318.1698	2318.1801	-4.44	1	(154)	3.9e-016	1		K.LPESERLPCSENHLALALNR.L 4865 4868 4869
	4870	580.5518	2318.1782	2318.1801	-0.81	1	(154)	3.9e-016	1		K.LPESERLPCSENHLALALNR.L 4866 4871 4872
	4873	580.7968	2319.1582	2319.1641	-2.55	1	154	3.9e-016	1		K.LPESERLPCSENHLALALNR.L 4875
	4940	592.7582	2367.0039	2367.0107	-2.90	1	154	3.9e-016	1		K.CAADESAENCDKSLHTLFGDK.L
	5045	1216.0881	2430.1617	2430.1162	18.7	0	154	3.9e-016	1		K.NCDLFEEVGEYDFQNALIVR.Y
	5103	1239.6403	2477.2660	2477.2413	9.94	0	(154)	3.9e-016	1		K.GLVLVAFSQYLQQCPFEDHVK.L
	5104	826.7703	2477.2891	2477.2413	19.3	0	(154)	3.9e-016	1		K.GLVLVAFSQYLQQCPFEDHVK.L 5105
	5128	831.7336	2492.1789	2492.1893	-4.18	1	91	8e-010	1		K.AETFTFHADICTLPEDEKQIK.K
	5145	626.8047	2503.1899	2503.2053	-6.16	1	(154)	3.9e-016	1		K.LKPEPDAQCAAFQEDPDKFLGK.Y 5147 5150 5151 5152 5153
	5146	835.4051	2503.1934	2503.2053	-4.74	1	(154)	3.9e-016	1		K.LKPEPDAQCAAFQEDPDKFLGK.Y 5148 5149
	5214	843.3812	2527.1219	2527.1577	-14.19	1	(154)	3.9e-016	1		K.EFKAETFTFHADICTLPEDEK.Q 5216
	5786	1005.7747	3014.3021	3014.3136	-3.81	0	41	7.6e-005	1	U	K.CCAEADPPACYATVFDQFTPLVEEPK.S
2.	F7DYB1 Mass: 57329 Score: 10165 Matches: 91(86) Sequences: 25(23) emPAI: 10.05
	Alpha-amylase OS=Equus caballus OX=9796 GN=LOC100049851 PE=3 SV=1
	Query	Observed	Mr(expt)	Mr(calc)	ppm	Miss	Score	Expect	Rank	Unique	Peptide
	480	737.3771	736.3699	736.3690	1.14	0	4	0.37	1	U	R.NMVAFR.N
	746	449.7368	897.4591	897.4596	-0.57	0	21	0.0073	1	U	R.YQPISYK.I
	932	492.2464	982.4782	982.4695	8.87	0	31	0.00075	1	U	K.HMWPGDIK.A 929 930 931
	976	500.2388	998.4631	998.4644	-1.28	0	(6)	0.27	1	U	K.HMWPGDIK.A
	1499	585.3467	1168.6789	1168.7067	-23.77	0	(154)	3.9e-016	1	U	R.VVGLLDLALEK.D 1500
	1904	429.8976	1286.6711	1286.6772	-4.70	0	(65)	2.9e-007	1	U	R.TSIVHLFEWR.W
	1905	644.3431	1286.6716	1286.6772	-4.31	0	87	2e-009	1	U	R.TSIVHLFEWR.W
	1919	645.8121	1289.6096	1289.6074	1.70	0	32	0.00057	1	U	R.WVDIALECER.Y 1920
	2443	714.3511	1426.6877	1426.6953	-5.33	0	(154)	3.9e-016	1	U	R.ALVFVDNHDNQR.G 2446 2447 2448
	2444	476.5703	1426.6890	1426.6953	-4.42	0	(154)	3.9e-016	1	U	R.ALVFVDNHDNQR.G 2445
	2454	476.9015	1427.6825	1427.6793	2.25	0	(154)	3.9e-016	1	U	R.ALVFVDNHDNQR.G
	2455	714.8495	1427.6845	1427.6793	3.65	0	154	3.9e-016	1	U	R.ALVFVDNHDNQR.G
	2894	777.8315	1553.6484	1553.6358	8.14	0	41	7.6e-005	1	U	K.NWGEGWGFMPSDR.A
	2899	778.3381	1554.6617	1554.6733	-7.43	1	(154)	3.9e-016	1	U	R.SGNEDEFRDMVTR.C
	2900	519.2293	1554.6661	1554.6733	-4.61	1	(154)	3.9e-016	1	U	R.SGNEDEFRDMVTR.C 2901
	2903	519.5580	1555.6523	1555.6573	-3.19	1	(32)	0.00067	1	U	R.SGNEDEFRDMVTR.C
	2952	524.5637	1570.6693	1570.6682	0.73	1	(41)	7.6e-005	1	U	R.SGNEDEFRDMVTR.C
	3149	544.5976	1630.7710	1630.7852	-8.74	0	(154)	3.9e-016	1	U	R.GHGAGGASILTFWDSR.L 3152
	3150	816.3936	1630.7726	1630.7852	-7.76	0	(154)	3.9e-016	1	U	R.GHGAGGASILTFWDSR.L 3151 3153
	3323	566.6029	1696.7869	1696.8218	-20.57	0	(154)	3.9e-016	1	U	K.MAVGFMLAHPYGFTR.I 3327
	3326	849.4158	1696.8170	1696.8218	-2.83	0	(154)	3.9e-016	1	U	K.MAVGFMLAHPYGFTR.I
	3356	568.3173	1701.9300	1701.9665	-21.48	1	154	3.9e-016	1	U	R.VVGLLDLALEKDYVR.S
	3376	571.9398	1712.7976	1712.8167	-11.14	0	(41)	7.6e-005	1	U	K.MAVGFMLAHPYGFTR.I
	3377	571.9413	1712.8022	1712.8167	-8.47	0	154	3.9e-016	1	U	K.MAVGFMLAHPYGFTR.I
	3696	907.9250	1813.8354	1813.7948	22.4	0	154	3.9e-016	1	U	R.DFPAVPYSGWDFNDGK.C
	4366	1038.0598	2074.1051	2074.0847	9.81	0	(154)	3.9e-016	1	U	R.STIADYLNHLIDLGVAGFR.L
	4367	692.3758	2074.1056	2074.0847	10.0	0	(154)	3.9e-016	1	U	R.STIADYLNHLIDLGVAGFR.L
	4371	692.6862	2075.0368	2075.0687	-15.38	0	154	3.9e-016	1	U	R.STIADYLNHLIDLGVAGFR.L
	4396	1052.4458	2102.8770	2102.8963	-9.17	0	(154)	3.9e-016	1	U	K.CNSGSGEVENYNDIYQVR.D 4397 4398
	4400	1052.9437	2103.8729	2103.8803	-3.54	0	(154)	3.9e-016	1	U	K.CNSGSGEVENYNDIYQVR.D 4401
	4402	1052.9541	2103.8937	2103.8803	6.33	0	154	3.9e-016	1	U	K.CNSGSGEVENYNDIYQVR.D 4403
	4834	1151.9921	2301.9696	2301.9743	-2.05	0	(154)	3.9e-016	1	U	K.EVTINPDTTCGNDWVCEHR.W 4835 4838
	4836	768.3329	2301.9770	2301.9743	1.18	0	(154)	3.9e-016	1	U	K.EVTINPDTTCGNDWVCEHR.W 4837 4839 4840
	4841	768.6567	2302.9484	2302.9583	-4.31	0	(154)	3.9e-016	1	U	K.EVTINPDTTCGNDWVCEHR.W 4842
	5015	1206.5706	2411.1266	2411.1254	0.47	0	(154)	3.9e-016	1	U	R.NFQNGQDANDWIGPPNNNGVIK.E
	5017	1207.0482	2412.0819	2412.1094	-11.42	0	(134)	4.4e-014	1	U	R.NFQNGQDANDWIGPPNNNGVIK.E
	5018	1207.0525	2412.0904	2412.1094	-7.88	0	(154)	3.9e-016	1	U	R.NFQNGQDANDWIGPPNNNGVIK.E 5023
	5020	1207.0576	2412.1007	2412.1094	-3.63	0	(154)	3.9e-016	1	U	R.NFQNGQDANDWIGPPNNNGVIK.E 5021 5022 5024 5025
	5030	1207.5471	2413.0797	2413.0934	-5.70	0	(119)	1.3e-012	1	U	R.NFQNGQDANDWIGPPNNNGVIK.E 5028 5029 5031 5032
	5298	1291.6248	2581.2350	2581.1735	23.8	0	(154)	3.9e-016	1	U	R.NVVDGQAFTNWWDNGSNQVAFGR.G
	5299	1292.0710	2582.1275	2582.1575	-11.60	0	154	3.9e-016	1	U	R.NVVDGQAFTNWWDNGSNQVAFGR.G
	5707	979.1411	2934.4013	2934.4525	-17.45	0	154	3.9e-016	1	U	K.GFGGVQVSPPNENIVVNNPSRPWWER.Y
	5904	1040.4741	3118.4005	3118.4771	-24.55	0	41	7.6e-005	1	U	K.IYVSSDGSAYFSISNTAEDPFIAIHAESK.L
	5976	1078.2169	3231.6289	3231.5612	21.0	1	154	3.9e-016	1	U	K.IYVSSDGSAYFSISNTAEDPFIAIHAESKL.-
	5981	1085.7942	3254.3607	3254.3816	-6.40	0	(154)	3.9e-016	1	U	R.IYVDAVVNHMCGSGGGAGTSSTCGSYYNAGSR.D 5982 5983 5984 5985
	5986	1086.1195	3255.3367	3255.3656	-8.88	0	(154)	3.9e-016	1	U	R.IYVDAVVNHMCGSGGGAGTSSTCGSYYNAGSR.D 5987 5989 5990
	5988	1086.1239	3255.3499	3255.3656	-4.83	0	(112)	6.2e-012	1	U	R.IYVDAVVNHMCGSGGGAGTSSTCGSYYNAGSR.D
	5999	1091.1348	3270.3825	3270.3765	1.83	0	154	3.9e-016	1	U	R.IYVDAVVNHMCGSGGGAGTSSTCGSYYNAGSR.D
	6090	875.4529	3497.7824	3497.7983	-4.55	0	154	3.9e-016	1	U	K.LHNLNTNWFPQGSKPFIYQEVIDLGTEPIK.G
	6211	1300.5356	3898.5851	3898.6806	-24.48	1	11	0.087	1	U	R.DFPAVPYSGWDFNDGKCNSGSGEVENYNDIYQVR.D
	6314	1498.0500	4491.1283	4491.0999	6.32	1	154	3.9e-016	1	U	R.GFIVFNNDDWALSSTLQTGLPGGTYCDVISGDKVDGNCTGIK.I
3.	F6RDD3 Mass: 16129 Score: 8719 Matches: 83(78) Sequences: 15(15) emPAI: 173.22
	Globin A1 OS=Equus caballus OX=9796 GN=HBB PE=3 SV=1
	Query	Observed	Mr(expt)	Mr(calc)	ppm	Miss	Score	Expect	Rank	Unique	Peptide
	943	493.7840	985.5534	985.5596	-6.36	0	(154)	3.9e-016	1	U	K.AAVLALWDK.V 944
	1355	563.7836	1125.5527	1125.5567	-3.55	0	59	1.3e-006	1	U	K.LHVDPENFR.L 1354 1356 1357 1358
	1432	575.3428	1148.6711	1148.6666	3.95	0	(154)	3.9e-016	1	U	K.VVAGVANALAHK.Y
	1433	383.8978	1148.6716	1148.6666	4.34	0	(154)	3.9e-016	1	U	K.VVAGVANALAHK.Y 1430 1431 1434
	1438	575.8309	1149.6472	1149.6506	-2.95	0	(154)	3.9e-016	1	U	K.VVAGVANALAHK.Y
	1439	384.2231	1149.6476	1149.6506	-2.59	0	154	3.9e-016	1	U	K.VVAGVANALAHK.Y
	1805	633.4172	1264.8199	1264.8231	-2.51	0	(154)	3.9e-016	1	U	R.LLGNVLVVVLAR.H 1806 1808
	1842	637.8536	1273.6926	1273.7183	-20.17	0	(154)	3.9e-016	1	U	R.LLVVYPWTQR.F 1844
	2201	679.8281	1357.6417	1357.6474	-4.17	0	(154)	3.9e-016	1	U	K.VNEEEVGGEALGR.L 2202 2203
	2438	713.8385	1425.6625	1425.6776	-10.62	0	(154)	3.9e-016	1	U	K.DFTPELQASYQK.V 2436 2437 2439 2440 2441 2442
	2511	483.5631	1447.6674	1447.6766	-6.32	0	(15)	0.029	1	U	K.GTFAALSELHCDK.L
	2515	724.8494	1447.6842	1447.6766	5.26	0	(154)	3.9e-016	1	U	K.GTFAALSELHCDK.L 2513 2516
	2520	725.4009	1448.7873	1448.7888	-1.03	1	(154)	3.9e-016	1	U	K.VVAGVANALAHKYH.- 2522
	2521	483.9369	1448.7888	1448.7888	0.02	1	(154)	3.9e-016	1	U	K.VVAGVANALAHKYH.- 2523
	2526	484.2627	1449.7662	1449.7728	-4.59	1	154	3.9e-016	1	U	K.VVAGVANALAHKYH.-
	3647	451.2376	1800.9215	1800.9271	-3.15	0	(154)	3.9e-016	1		K.VLHSFGEGVHHLDNLK.G 3646 3648 3650 3652 3654 3657 3658 3660
	3653	601.3171	1800.9296	1800.9271	1.37	0	(154)	3.9e-016	1		K.VLHSFGEGVHHLDNLK.G 3651 3656 3659
	3925	632.6390	1894.8953	1894.9214	-13.76	1	(154)	3.9e-016	1	U	R.HFGKDFTPELQASYQK.V 3927 3928 3929 3930
	3926	948.4591	1894.9037	1894.9214	-9.34	1	(154)	3.9e-016	1	U	R.HFGKDFTPELQASYQK.V
	4024	483.2579	1929.0025	1929.0221	-10.14	1	(154)	3.9e-016	1		K.KVLHSFGEGVHHLDNLK.G 4026 4027 4031
	4029	644.0111	1929.0115	1929.0221	-5.49	1	(154)	3.9e-016	1		K.KVLHSFGEGVHHLDNLK.G
	4214	1000.4510	1998.8874	1998.9146	-13.58	0	(154)	3.9e-016	1	U	R.FFDSFGDLSNPGAVMGNPK.V 4216 4217 4218 4219
	4251	1008.4401	2014.8657	2014.9095	-21.74	0	154	3.9e-016	1	U	R.FFDSFGDLSNPGAVMGNPK.V
	4885	776.0620	2325.1640	2325.1964	-13.94	1	(154)	3.9e-016	1	U	K.AAVLALWDKVNEEEVGGEALGR.L 4887 4888 4890 4891
	4886	1163.5942	2325.1739	2325.1964	-9.68	1	(154)	3.9e-016	1	U	K.AAVLALWDKVNEEEVGGEALGR.L
	5258	852.7358	2555.1855	2555.2227	-14.56	1	(154)	3.9e-016	1	U	K.GTFAALSELHCDKLHVDPENFR.L 5260 5261 5263
	5259	639.8096	2555.2092	2555.2227	-5.29	1	(154)	3.9e-016	1	U	K.GTFAALSELHCDKLHVDPENFR.L 5262 5264 5265 5266
	Proteins matching the same set of peptides:
	P02062 Mass: 15998 Score: 8719 Matches: 83(78) Sequences: 15(15)
	Hemoglobin subunit beta OS=Equus caballus OX=9796 GN=HBB PE=1 SV=1
4.	P27425 Mass: 78044 Score: 7790 Matches: 85(76) Sequences: 40(37) emPAI: 6.22
	Serotransferrin OS=Equus caballus OX=9796 GN=TF PE=2 SV=1
	Query	Observed	Mr(expt)	Mr(calc)	ppm	Miss	Score	Expect	Rank	Unique	Peptide
	697	439.7400	877.4655	877.4658	-0.31	0	83	4.7e-009	1	U	K.DSALGFLR.I
	825	466.2362	930.4579	930.4593	-1.55	0	(6)	0.27	1	U	K.LLCPDGTR.K 826
	1012	507.2494	1012.4842	1012.4899	-5.68	0	15	0.031	1	U	R.TSYLECIK.A 1013
	1028	510.7995	1019.5844	1019.5764	7.88	0	28	0.0017	1	U	K.YLTAVANLR.Q
	1257	549.2543	1096.4940	1096.4978	-3.46	0	41	8.7e-005	1		R.YYGYTGAFR.C 1258 1259
	1267	551.2722	1100.5299	1100.5325	-2.35	0	84	4e-009	1	U	K.FCLFQSATK.D
	1498	585.3008	1168.5870	1168.5910	-3.43	1	11	0.083	1	U	K.RTSYLECIK.A
	1748	623.3179	1244.6212	1244.6336	-9.95	1	(41)	7.6e-005	1	U	R.LLEACTFHRV.-
	1749	415.8818	1244.6236	1244.6336	-8.02	1	154	3.9e-016	1	U	R.LLEACTFHRV.-
	1827	424.5434	1270.6084	1270.6095	-0.88	0	41	7.6e-005	1	U	K.DFHLFSSPHGK.D 1828 1829
	2046	661.8239	1321.6332	1321.6337	-0.38	0	154	3.9e-016	1	U	K.CLADGAGDVAFVK.H 2045
	2146	449.5406	1345.6001	1345.6085	-6.22	0	(154)	3.9e-016	1	U	R.WCTVSNHEVSK.C 2152
	2148	673.8076	1345.6007	1345.6085	-5.80	0	154	3.9e-016	1	U	R.WCTVSNHEVSK.C 2144 2145
	2164	675.8895	1349.7644	1349.7741	-7.20	0	(154)	3.9e-016	1	U	K.SIVPAPPLVACVK.R 2165 2166
	2226	682.8590	1363.7035	1363.7170	-9.91	1	(6)	0.27	1	U	R.CLVEKGDVAFVK.H
	2227	455.5771	1363.7093	1363.7170	-5.60	1	154	3.9e-016	1	U	R.CLVEKGDVAFVK.H
	2302	695.8523	1389.6900	1389.7001	-7.21	0	148	1.5e-015	1	U	K.NSNFQLNQLQGK.K
	2305	696.3431	1390.6717	1390.6841	-8.87	0	(20)	0.011	1	U	K.NSNFQLNQLQGK.K
	2518	725.3430	1448.6715	1448.6783	-4.72	0	154	3.9e-016	1	U	K.SSSDPDLTWNSLK.G 2519
	2570	730.3711	1458.7276	1458.7323	-3.21	0	141	7.3e-015	1	U	R.TAVPNLCQLCVGK.G 2568
	2682	372.4373	1485.7200	1485.7365	-11.06	1	(31)	0.00072	1	U	K.SKDFHLFSSPHGK.D 2684
	2683	496.2515	1485.7327	1485.7365	-2.50	1	(154)	3.9e-016	1	U	K.SKDFHLFSSPHGK.D 2685
	2793	759.9020	1517.7894	1517.7950	-3.70	1	13	0.045	1	U	K.KNSNFQLNQLQGK.K
	3049	535.9449	1604.8130	1604.8199	-4.27	0	(154)	3.9e-016	1	U	K.TEPQTHYYAVAVVK.K 3050
	3051	803.4230	1604.8314	1604.8199	7.19	0	(32)	0.00067	1	U	K.TEPQTHYYAVAVVK.K
	3088	538.9312	1613.7716	1613.7719	-0.17	1	154	3.9e-016	1	U	R.EDIRPEVPKDECK.K 3084
	3233	829.9202	1657.8258	1657.8246	0.70	0	144	4.2e-015	1	U	K.DCYLASIPSHAVVAR.S
	3441	578.6388	1732.8946	1732.9148	-11.69	1	(154)	3.9e-016	1	U	K.TEPQTHYYAVAVVKK.N 3444
	3497	879.3812	1756.7479	1756.7661	-10.38	0	154	3.9e-016	1	U	K.AVSNFFAGSCVPCADR.T 3498
	3617	896.9724	1791.9302	1791.9229	4.04	0	99	1.3e-010	1	U	R.TAGWNIPMGLLYSEIK.H
	3695	907.9193	1813.8239	1813.8556	-17.47	0	154	3.9e-016	1	U	K.GEADAMSLDGGFIYIAGK.C
	3853	934.9371	1867.8596	1867.8622	-1.39	0	(154)	3.9e-016	1	U	R.DDTQCLANLQPTTTYK.T 3852 3854
	4123	655.2942	1962.8607	1962.8676	-3.50	0	(154)	3.9e-016	1	U	K.AACVCQELHNQQASYGK.N 4124
	4125	982.4394	1962.8642	1962.8676	-1.72	0	154	3.9e-016	1	U	K.AACVCQELHNQQASYGK.N
	4192	665.6059	1993.7959	1993.8087	-6.45	0	(154)	3.9e-016	1	U	K.CACSNHEPYFGYSGAFK.C 4193 4194
	4195	997.9156	1993.8167	1993.8087	4.03	0	(154)	3.9e-016	1	U	K.CACSNHEPYFGYSGAFK.C 4196
	4198	665.9376	1994.7910	1994.7927	-0.85	0	(33)	0.00052	1	U	K.CACSNHEPYFGYSGAFK.C
	4200	666.3082	1995.9027	1995.8931	4.78	1	11	0.082	1	U	K.NGSHCPDKFCLFQSATK.D
	4368	692.6589	2074.9550	2074.9630	-3.86	0	(154)	3.9e-016	1	U	R.SGSACVDTPEEGYHAVAVVK.S 4370
	4369	1038.4868	2074.9591	2074.9630	-1.88	0	(154)	3.9e-016	1	U	R.SGSACVDTPEEGYHAVAVVK.S
	4415	704.3215	2109.9428	2109.9464	-1.73	1	(154)	3.9e-016	1	U	K.HQTVEQNTDGRNPDDWAK.D 4417
	4609	1105.6028	2209.1910	2209.1684	10.2	0	154	3.9e-016	1	U	R.SAGWNIPIGLLYWQLPEPR.E
	4647	741.0071	2219.9996	2220.0052	-2.51	1	154	3.9e-016	1	U	K.EKAACVCQELHNQQASYGK.N
	4674	743.3764	2227.1074	2227.0909	7.39	0	154	3.9e-016	1	U	K.EDLIWGLLNQAQEHFGTEK.S
	4963	794.0532	2379.1377	2379.1529	-6.40	1	(154)	3.9e-016	1	U	K.SVDEYKDCYLASIPSHAVVAR.S 4966
	4965	595.7987	2379.1657	2379.1529	5.40	1	(41)	7.6e-005	1	U	K.SVDEYKDCYLASIPSHAVVAR.S
	5432	672.3276	2685.2814	2685.2816	-0.08	1	(129)	1.2e-013	1	U	K.HSTVLENLPQEADRDEYQLLCR.D 5434
	5433	896.1017	2685.2834	2685.2816	0.66	1	154	3.9e-016	1	U	K.HSTVLENLPQEADRDEYQLLCR.D 5431
	5465	679.3551	2713.3913	2713.3347	20.8	1	154	3.9e-016	1	U	R.SVDGKEDLIWGLLNQAQEHFGTEK.S
	5713	1473.5874	2945.1603	2945.1750	-4.99	0	(154)	3.9e-016	1	U	K.CDEWSVNSGGNIECESAQSTEDCIAK.I 5714
	5924	1058.4523	3172.3350	3172.3383	-1.06	1	(154)	3.9e-016	1	U	K.VKCDEWSVNSGGNIECESAQSTEDCIAK.I 5925
	6234	1319.0190	3954.0353	3953.9938	10.5	0	154	3.9e-016	1	U	K.AIADNEADAVTLDAGLVFEAGLSPYNLKPVVAEFYGSK.T
5.	F6W1N4 Mass: 82952 Score: 6358 Matches: 64(59) Sequences: 24(23) emPAI: 2.46
	Uncharacterized protein OS=Equus caballus OX=9796 GN=PIGR PE=4 SV=1
	Query	Observed	Mr(expt)	Mr(calc)	ppm	Miss	Score	Expect	Rank	Unique	Peptide
	555	397.2121	792.4097	792.4130	-4.17	0	21	0.0084	1	U	R.GLSFDVR.L
	973	499.2866	996.5586	996.5604	-1.82	0	41	7.6e-005	1	U	K.IVEGQPNLK.V 971 972
	1196	539.8081	1077.6017	1077.6070	-4.97	0	41	7.6e-005	1	U	R.ETVAVYVAVK.E
	1455	579.2905	1156.5665	1156.5724	-5.12	0	41	7.6e-005	1	U	K.VESEVVQDPR.L
	1793	628.7881	1255.5616	1255.5656	-3.13	0	41	7.6e-005	1	U	K.CYYPPTSVNR.H 1794
	1897	643.3373	1284.6601	1284.6674	-5.64	1	(154)	3.9e-016	1	U	R.KVESEVVQDPR.L 1898
	2044	441.2614	1320.7622	1320.7765	-10.82	1	32	0.00067	1	U	K.IVEGQPNLKVPK.T 2042
	2186	678.7910	1355.5675	1355.5605	5.16	0	30	0.00097	1	U	K.GDEGWYWCGVK.E 2185
	2215	681.3297	1360.6447	1360.6470	-1.66	0	154	3.9e-016	1	U	R.AAAAEDEIETSVR.K
	2791	759.8901	1517.7656	1517.7548	7.10	0	55	2.9e-006	1	U	R.FDCALGPEVVNVAK.F 2790
	3085	807.8907	1613.7668	1613.7719	-3.16	0	(154)	3.9e-016	1	U	K.GQCTTLISSNGYVSK.D 3086 3087
	3095	808.3841	1614.7536	1614.7559	-1.42	0	(154)	3.9e-016	1	U	K.GQCTTLISSNGYVSK.D 3094 3096 3097
	3105	808.9232	1615.8318	1615.8392	-4.62	0	(154)	3.9e-016	1	U	K.GVVGGSVAVLCPYNPK.E 3106
	3128	542.5992	1624.7759	1624.7845	-5.30	1	(154)	3.9e-016	1	U	R.VIDSAGYKGPNYEGR.A 3130
	3129	813.3958	1624.7770	1624.7845	-4.65	1	(154)	3.9e-016	1	U	R.VIDSAGYKGPNYEGR.A
	3442	867.4560	1732.8974	1732.8818	9.02	0	(154)	3.9e-016	1	U	K.VSISCPFTSANLPNVK.S 3440 3443
	3669	903.8826	1805.7506	1805.7639	-7.36	0	(154)	3.9e-016	1	U	K.EDAGPYLCGANSDGQPR.K 3670 3671
	4052	645.6221	1933.8446	1933.8588	-7.37	1	(154)	3.9e-016	1	U	R.KEDAGPYLCGANSDGQPR.K 4054
	4053	967.9357	1933.8569	1933.8588	-0.99	1	(154)	3.9e-016	1	U	R.KEDAGPYLCGANSDGQPR.K
	4058	645.9545	1934.8418	1934.8428	-0.56	1	154	3.9e-016	1	U	R.KEDAGPYLCGANSDGQPR.K
	4184	995.4966	1988.9786	1989.0280	-24.81	0	154	3.9e-016	1	U	R.ILSQNNNGVFSVDVTNLR.K
	4442	706.7147	2117.1223	2117.1229	-0.27	1	(11)	0.083	1	U	R.ILSQNNNGVFSVDVTNLRK.E
	4445	707.0374	2118.0902	2118.1069	-7.88	1	91	7.3e-010	1	U	R.ILSQNNNGVFSVDVTNLRK.E 4444
	4564	1086.5157	2171.0169	2171.0351	-8.37	0	(154)	3.9e-016	1	U	K.TVNVELGETVQLTCHSPCK.F 4567
	4565	724.6797	2171.0174	2171.0351	-8.15	0	(154)	3.9e-016	1	U	K.TVNVELGETVQLTCHSPCK.F 4566
	4671	1114.5413	2227.0680	2227.0943	-11.84	0	(154)	3.9e-016	1	U	R.WEDIQNSGCPPLVQSTGLVK.N 4672 4673
	4677	1115.0328	2228.0511	2228.0783	-12.22	0	(26)	0.0027	1	U	R.WEDIQNSGCPPLVQSTGLVK.N
	4695	746.0096	2235.0069	2235.0114	-1.99	1	(154)	3.9e-016	1	U	K.GQCTTLISSNGYVSKDYEGR.A 4697
	4696	1118.5154	2235.0162	2235.0114	2.17	1	(154)	3.9e-016	1	U	K.GQCTTLISSNGYVSKDYEGR.A
	5366	879.7866	2636.3379	2636.3810	-16.35	0	(154)	3.9e-016	1	U	K.SNVDLHVLKPEPELVYADLGSSVR.F 5369
	5368	660.0957	2636.3537	2636.3810	-10.34	0	(154)	3.9e-016	1	U	K.SNVDLHVLKPEPELVYADLGSSVR.F 5365
	5662	964.1580	2889.4522	2889.4773	-8.69	0	(154)	3.9e-016	1	U	K.SRPSQAWQLFVNEETTFPSRPSVVK.G 5664
	5663	723.3704	2889.4526	2889.4773	-8.57	0	(154)	3.9e-016	1	U	K.SRPSQAWQLFVNEETTFPSRPSVVK.G 5665 5666
	6247	1005.7316	4018.8972	4018.9218	-6.14	1	9	0.13	1	U	K.YVCQAGDDSSGDKSNVDLHVLKPEPELVYADLGSSVR.F
	Proteins matching the same set of peptides:
	F6W2K5 Mass: 83421 Score: 6358 Matches: 64(59) Sequences: 24(23)
	Uncharacterized protein OS=Equus caballus OX=9796 GN=PIGR PE=4 SV=1
6.	P01958 Mass: 15236 Score: 4557 Matches: 58(52) Sequences: 10(10) emPAI: 36.70
	Hemoglobin subunit alpha OS=Equus caballus OX=9796 GN=HBA PE=1 SV=2
	Query	Observed	Mr(expt)	Mr(calc)	ppm	Miss	Score	Expect	Rank	Unique	Peptide
	590	409.7226	817.4307	817.4334	-3.32	0	(15)	0.029	1	U	R.VDPVNFK.L 591 592
	1101	521.2755	1040.5365	1040.5365	-0.02	0	(73)	4.8e-008	1	U	R.MFLGFPTTK.T 1097 1098 1099 1100 156
	1145	529.2706	1056.5266	1056.5314	-4.57	0	97	1.9e-010	1	U	R.MFLGFPTTK.T 1143 1144 1146
	1225	363.2134	1086.6185	1086.6186	-0.08	1	(9)	0.13	1	U	K.LRVDPVNFK.L
	1227	544.3172	1086.6198	1086.6186	1.17	1	151	7.8e-016	1	U	K.LRVDPVNFK.L 1226 1228
	1422	573.3345	1144.6544	1144.6452	8.06	1	154	3.9e-016	1	U	M.VLSAADKTNVK.A
	1811	634.8528	1267.6910	1267.7024	-8.96	0	(154)	3.9e-016	1	U	K.FLSSVSTVLTSK.Y 1812 1813 1814 327 1815 1816
	1934	647.3461	1292.6776	1291.6806	772	1	41	7.6e-005	1	U	-.MVLSAADKTNVK.A 1935
	3737	917.4412	1832.8679	1832.8846	-9.11	0	(154)	3.9e-016	1	U	K.TYFPHFDLSHGSAQVK.A 3742
	3738	611.9634	1832.8683	1832.8846	-8.89	0	(154)	3.9e-016	1	U	K.TYFPHFDLSHGSAQVK.A 3744 3746 3748 3749 3750
	3751	459.2322	1832.8997	1832.8846	8.25	0	(69)	1.1e-007	1	U	K.TYFPHFDLSHGSAQVK.A 3739 3740 3743 3745 3747 3752
	5720	1475.2628	2948.5111	2948.5356	-8.31	0	(154)	3.9e-016	1	U	K.VGDALTLAVGHLDDLPGALSNLSDLHAHK.L 5737
	5723	738.1370	2948.5187	2948.5356	-5.71	0	(154)	3.9e-016	1	U	K.VGDALTLAVGHLDDLPGALSNLSDLHAHK.L 5735 5748
	5730	983.8516	2948.5330	2948.5356	-0.86	0	(154)	3.9e-016	1	U	K.VGDALTLAVGHLDDLPGALSNLSDLHAHK.L 5742
	5834	1023.8557	3068.5451	3068.6117	-21.70	0	(154)	3.9e-016	1	U	K.LLSHCLLSTLAVHLPNDFTPAVHASLDK.F 5835
	5836	768.1437	3068.5458	3068.6117	-21.47	0	(154)	3.9e-016	1	U	K.LLSHCLLSTLAVHLPNDFTPAVHASLDK.F 5838 5861
	5869	768.4033	3069.5842	3069.5957	-3.77	0	(11)	0.083	1	U	K.LLSHCLLSTLAVHLPNDFTPAVHASLDK.F
	5884	616.3363	3076.6451	3076.6305	4.75	1	(15)	0.031	1	U	K.KVGDALTLAVGHLDDLPGALSNLSDLHAHK.L
	5885	770.1737	3076.6657	3076.6305	11.4	1	(154)	3.9e-016	1	U	K.KVGDALTLAVGHLDDLPGALSNLSDLHAHK.L
	5886	1026.5630	3076.6671	3076.6305	11.9	1	154	3.9e-016	1	U	K.KVGDALTLAVGHLDDLPGALSNLSDLHAHK.L
7.	F7BLE3 Mass: 134841 Score: 4545 Matches: 74(63) Sequences: 44(37) emPAI: 2.08
	Uncharacterized protein OS=Equus caballus OX=9796 PE=4 SV=1
	Query	Observed	Mr(expt)	Mr(calc)	ppm	Miss	Score	Expect	Rank	Unique	Peptide
	562	400.7463	799.4781	799.4804	-2.88	0	126	2.5e-013	1		R.VGLVAVDK.G
	599	412.2329	822.4512	822.4487	3.03	0	32	0.00067	1		R.IFTLDSK.L
	625	417.2469	832.4793	832.4807	-1.61	0	6	0.27	1		R.LPYSVVR.N
	680	432.7563	863.4981	863.4939	4.87	0	11	0.083	1		K.IMNVFLK.D
	747	449.7443	897.4741	897.4708	3.64	0	32	0.00067	1		R.AVLYNYR.E
	759	452.7840	903.5534	903.5542	-0.82	1	32	0.00067	1		K.GVFVLNKK.N 758
	857	471.2708	940.5270	940.5229	4.35	0	128	1.4e-013	1	U	K.LEDPLLNK.F 856 858
	889	480.2742	958.5338	958.5335	0.39	0	4	0.37	1		R.QESLELIK.K
	946	494.7950	987.5755	987.5713	4.25	0	85	3e-009	1		R.ISLAQSLTR.V 945
	986	501.7774	1001.5403	1001.5393	0.93	0	56	2.4e-006	1		K.TGLQEVEVK.A 985 987
	1025	509.7821	1017.5497	1017.5495	0.23	1	9	0.13	1		R.KIWDTVEK.A
	1195	539.2809	1076.5472	1076.5536	-5.95	0	3	0.47	1		K.DSCVGTLVVK.G
	1224	544.3155	1086.6164	1086.6284	-11.05	1	15	0.033	1		R.QESLELIKK.G
	1307	558.3232	1114.6318	1114.6346	-2.49	1	11	0.083	1		K.RQESLELIK.K
	1389	569.3055	1136.5964	1136.6077	-9.96	0	41	7.6e-005	1		K.ANGYLGTVTIK.I
	1586	599.3300	1196.6455	1196.6513	-4.89	0	(41)	7.6e-005	1		R.DVLLNGVQPSR.A
	1588	599.8127	1197.6109	1197.6353	-20.38	0	41	7.6e-005	1		R.DVLLNGVQPSR.A 1589 1590
	1676	613.2569	1224.4992	1224.5016	-1.90	0	41	7.6e-005	1		R.ENPMGFSCQR.R
	1815	634.8663	1267.7180	1267.7176	0.32	0	15	0.031	1		R.LVAYYTLINAK.G
	2142	673.3511	1344.6876	1344.6926	-3.68	0	55	3.5e-006	1		R.EVVADSVWVDVK.D
	2213	681.3273	1360.6401	1360.6405	-0.29	0	102	6.8e-011	1	U	K.DICEGQVNSLAR.S 2214
	2243	685.8695	1369.7245	1369.7242	0.22	0	154	3.9e-016	1		K.TIYTPGSTVLYR.I 2240 2241 2242
	2285	693.4127	1384.8109	1384.8330	-15.95	0	15	0.029	1		K.SSLAVPYVIVPLK.T
	2679	743.4171	1484.8196	1484.8199	-0.20	1	154	3.9e-016	1		R.VVIEDGTGEAVLKR.D
	2794	760.3674	1518.7203	1518.7215	-0.79	0	103	4.6e-011	1		K.AGDFLEAHYNNLR.R
	2916	521.9345	1562.7817	1562.7801	1.01	0	154	3.9e-016	1	U	R.TLDPEHLGQNGVQR.E
	2918	522.2607	1563.7604	1563.7641	-2.39	0	(41)	7.6e-005	1	U	R.TLDPEHLGQNGVQR.E
	3019	533.2775	1596.8108	1596.8300	-12.06	1	7	0.22	1	U	K.AAVYHYFISDGVKK.T
	3592	894.4786	1786.9426	1786.9618	-10.73	0	(154)	3.9e-016	1		R.SGIPIVTSPYQIHFTK.T 3594
	3593	596.6574	1786.9504	1786.9618	-6.37	0	154	3.9e-016	1		R.SGIPIVTSPYQIHFTK.T 3596
	3634	599.3198	1794.9376	1794.9450	-4.12	0	24	0.0037	1	U	R.RPYSVAIAGYALAQMGK.L
	3693	906.9620	1811.9094	1811.9128	-1.85	0	154	3.9e-016	1		R.VELLYNPAFCSLATSK.R
	3762	919.5045	1836.9945	1836.9986	-2.22	0	154	3.9e-016	1		K.VVLVGAQSGYLFIQTDK.T
	3802	926.4600	1850.9055	1850.9163	-5.85	0	82	6.8e-009	1		K.GQSFVTVHASFGGTTVEK.V
	3810	927.5084	1853.0022	1853.0258	-12.76	0	(154)	3.9e-016	1	U	K.LSINTPNSQQPLTITVK.T 3811
	3849	623.3361	1866.9864	1866.9952	-4.73	0	(41)	7.6e-005	1	U	R.TELKPGETLNVNFHLR.T
	3851	467.7560	1866.9951	1866.9952	-0.06	0	154	3.9e-016	1	U	R.TELKPGETLNVNFHLR.T
	3961	953.5240	1905.0335	1905.0095	12.6	1	154	3.9e-016	1		K.DSITTWEILAVSLSDKK.G
	3962	636.0191	1905.0355	1905.0095	13.6	1	(15)	0.031	1		K.DSITTWEILAVSLSDKK.G
	4136	655.9894	1964.9463	1964.9705	-12.30	1	154	3.9e-016	1		K.NVDGTAFVIFGVQDGDRR.I 4133
	4137	983.4808	1964.9471	1964.9705	-11.89	1	(36)	0.00023	1		K.NVDGTAFVIFGVQDGDRR.I 4134
	4488	1070.0017	2137.9889	2137.9957	-3.17	0	(154)	3.9e-016	1	U	R.VHYEDSPQQVFSAEFEVK.E
	4490	713.6816	2138.0229	2137.9957	12.8	0	154	3.9e-016	1	U	R.VHYEDSPQQVFSAEFEVK.E 4489
	4526	1078.5693	2155.1241	2155.1121	5.57	0	154	3.9e-016	1		R.IPVVTQGSNVQSLTQDDGVAK.L
	4587	1095.1150	2188.2154	2188.1926	10.4	0	39	0.00011	1		K.VFALASNLIAIDSQVLCGAVK.W
	4797	763.7586	2288.2540	2288.2263	12.1	1	121	8.5e-013	1	U	R.NAEEKDVSLTAFVLIALQEAK.D
	4854	771.4118	2311.2136	2311.2132	0.16	1	29	0.0013	1		R.RIPVVTQGSNVQSLTQDDGVAK.L
	4956	792.7272	2375.1597	2375.1685	-3.70	1	154	3.9e-016	1	U	R.SQFPESWLWTIEELKEPEK.N
	5181	629.0632	2512.2238	2512.2281	-1.71	0	(41)	7.6e-005	1		K.TMQAHPYNTLGGSGNYLHLSVPR.T
	5183	838.4246	2512.2520	2512.2281	9.52	0	154	3.9e-016	1		K.TMQAHPYNTLGGSGNYLHLSVPR.T
	5218	633.0596	2528.2094	2528.2230	-5.39	0	(15)	0.029	1		K.TMQAHPYNTLGGSGNYLHLSVPR.T
	5304	646.8175	2583.2409	2583.2540	-5.08	0	(154)	3.9e-016	1	U	K.QKPDGVFQEDGPVIHQEMIGGFR.N 5306
	5305	862.0894	2583.2462	2583.2540	-3.02	0	(154)	3.9e-016	1	U	K.QKPDGVFQEDGPVIHQEMIGGFR.N 5307
	5308	862.1110	2583.3112	2583.2654	17.7	0	53	5.3e-006	1		K.FFKPAMPFDLMVFVTNPDGSPAR.R
8.	Q2TU62 Mass: 100072 Score: 4453 Matches: 60(55) Sequences: 30(29) emPAI: 1.99
	Calcium-activated chloride channel regulator 1 OS=Equus caballus OX=9796 GN=CLCA1 PE=1 SV=1
	Query	Observed	Mr(expt)	Mr(calc)	ppm	Miss	Score	Expect	Rank	Unique	Peptide
	737	445.7400	889.4654	889.4658	-0.37	0	11	0.083	1	U	R.STWEVIR.D 736
	1058	515.7903	1029.5660	1029.5706	-4.46	0	32	0.00067	1	U	K.INIDDLLSK.Q 1056 149
	1105	522.8038	1043.5931	1043.5975	-4.19	0	118	1.4e-012	1	U	R.ISTNILDLR.D
	1279	552.3303	1102.6461	1102.6611	-13.61	0	32	0.00067	1	U	K.IHQGGLPILR.A 1278
	1282	553.8256	1105.6366	1105.6172	17.5	0	32	0.00067	1	U	K.FPSPVVVYAK.I
	1302	557.3095	1112.6045	1112.6091	-4.14	0	15	0.029	1	U	K.VWALGGVNAAR.Q
	1527	589.8152	1177.6158	1177.6165	-0.59	0	17	0.019	1	U	K.MAYLQVPGTAK.V 1526
	1566	595.7998	1189.5851	1189.5840	0.92	1	116	2.5e-012	1	U	K.RLDEYGPQGR.V 1565
	1613	603.7780	1205.5414	1205.5465	-4.29	0	67	2e-007	1	U	R.YFTAYNTNGR.Y
	1615	604.2700	1206.5255	1206.5305	-4.18	0	(41)	7.6e-005	1	U	R.YFTAYNTNGR.Y 1616
	1672	612.2964	1222.5782	1222.5830	-3.91	0	(154)	3.9e-016	1	U	K.QDGFVVDTNTK.M 1673
	1830	636.3300	1270.6455	1270.6598	-11.25	0	154	3.9e-016	1	U	R.IYFTPDFLAGK.R
	1888	641.8529	1281.6913	1281.7081	-13.14	0	154	3.9e-016	1	U	K.NVAILVPENWK.T 1889 1890
	1932	431.8980	1292.6723	1292.6778	-4.28	0	(154)	3.9e-016	1	U	R.VFVHEWAHLR.W 1933
	1982	652.3563	1302.6981	1302.7031	-3.84	0	(154)	3.9e-016	1	U	R.ATVTALIESVDGK.T 1981 1984
	2174	676.3431	1350.6717	1350.6780	-4.62	1	(154)	3.9e-016	1	U	K.KQDGFVVDTNTK.M 2175
	2209	679.8755	1357.7365	1357.7453	-6.45	0	42	5.9e-005	1	U	R.ASSATLPPVTVTSK.V 2208 2210
	2417	710.8878	1419.7610	1419.7623	-0.91	0	154	3.9e-016	1	U	K.NGEIIWNPPRPK.I 2416
	2449	714.3810	1426.7474	1426.7609	-9.44	1	(4)	0.37	1	U	R.IYFTPDFLAGKR.L
	2451	476.5933	1426.7580	1426.7609	-2.05	1	16	0.026	1	U	R.IYFTPDFLAGKR.L
	2763	503.2720	1506.7941	1506.8082	-9.39	1	(107)	1.9e-011	1	U	K.DTGKFPSPVVVYAK.I
	2764	754.4045	1506.7944	1506.8082	-9.18	1	154	3.9e-016	1	U	K.DTGKFPSPVVVYAK.I
	2805	764.8290	1527.6435	1527.6630	-12.75	0	154	3.9e-016	1	U	R.WGLFNEYNDDQK.F
	3238	831.9242	1661.8338	1661.8407	-4.12	0	154	3.9e-016	1	U	K.SLPTVASGGTSICSGLR.S
	3578	446.2329	1780.9027	1780.9359	-18.66	1	32	0.00067	1	U	K.TKPEYERPKLETYK.N 3580
	4083	649.2825	1944.8258	1944.8353	-4.90	0	14	0.041	1	U	K.NVVNHCQGGSCATKPCR.R
	4174	662.6552	1984.9436	1984.9564	-6.44	1	(154)	3.9e-016	1	U	K.DMVTQASPYLFEATEKR.F 4176
	4175	993.4805	1984.9464	1984.9564	-5.05	1	(154)	3.9e-016	1	U	K.DMVTQASPYLFEATEKR.F 4177
	4976	1193.0447	2384.0748	2384.0842	-3.94	0	154	3.9e-016	1	U	R.VTGLYAQECEFIPDEQQTEK.A
	5133	832.4029	2494.1869	2494.2187	-12.78	1	(154)	3.9e-016	1	U	K.TVTLELLDNGAGADATKDDGIYSR.Y 5135
	5134	1248.1108	2494.2071	2494.2187	-4.65	1	(15)	0.029	1	U	K.TVTLELLDNGAGADATKDDGIYSR.Y
	5300	1292.5889	2583.1632	2583.1911	-10.81	0	(154)	3.9e-016	1	U	K.NADVLVAEPNPPGNDQPYTEQMGK.C 5301 5302
	5303	862.0731	2583.1973	2583.1911	2.41	0	(17)	0.022	1	U	K.NADVLVAEPNPPGNDQPYTEQMGK.C
	5386	886.0703	2655.1889	2655.2123	-8.78	1	(41)	7.6e-005	1	U	R.DRVTGLYAQECEFIPDEQQTEK.A 5388
	5505	1372.1345	2742.2545	2742.2542	0.11	0	83	5.1e-009	1	U	K.TDGSEIVLLTDGEDNTISSCFNEVK.Q
	5804	1012.1321	3033.3744	3033.4125	-12.55	1	154	3.9e-016	1	U	K.YKTDGSEIVLLTDGEDNTISSCFNEVK.Q
9.	F7BTW7 Mass: 185862 Score: 4075 Matches: 69(58) Sequences: 44(38) emPAI: 1.15
	Uncharacterized protein OS=Equus caballus OX=9796 GN=LOC100060539 PE=4 SV=1
	Query	Observed	Mr(expt)	Mr(calc)	ppm	Miss	Score	Expect	Rank	Unique	Peptide
	562	400.7463	799.4781	799.4804	-2.88	0	126	2.5e-013	1		R.VGLVAVDK.G
	599	412.2329	822.4512	822.4487	3.03	0	32	0.00067	1		R.IFTLDSK.L
	625	417.2469	832.4793	832.4807	-1.61	0	6	0.27	1		R.LPYSVVR.N
	680	432.7563	863.4981	863.4939	4.87	0	11	0.083	1		K.IMNVFLK.D
	747	449.7443	897.4741	897.4708	3.64	0	32	0.00067	1		R.AVLYNYR.E
	759	452.7840	903.5534	903.5542	-0.82	1	32	0.00067	1		K.GVFVLNKK.N 758
	889	480.2742	958.5338	958.5335	0.39	0	4	0.37	1		R.QESLELIK.K
	946	494.7950	987.5755	987.5713	4.25	0	85	3e-009	1		R.ISLAQSLTR.V 945
	986	501.7774	1001.5403	1001.5393	0.93	0	56	2.4e-006	1		K.TGLQEVEVK.A 985 987
	1025	509.7821	1017.5497	1017.5495	0.23	1	9	0.13	1		R.KIWDTVEK.A
	1195	539.2809	1076.5472	1076.5536	-5.95	0	3	0.47	1		K.DSCVGTLVVK.G
	1224	544.3155	1086.6164	1086.6284	-11.05	1	15	0.033	1		R.QESLELIKK.G
	1241	546.8146	1091.6147	1091.6226	-7.25	0	15	0.035	1	U	K.NTLIIYLDK.I
	1260	550.2803	1098.5461	1098.5458	0.29	0	154	3.9e-016	1	U	K.GYTQQLAYR.Q 1262
	1307	558.3232	1114.6318	1114.6346	-2.49	1	11	0.083	1		K.RQESLELIK.K
	1389	569.3055	1136.5964	1136.6077	-9.96	0	41	7.6e-005	1		K.ANGYLGTVTIK.I
	1586	599.3300	1196.6455	1196.6513	-4.89	0	(41)	7.6e-005	1		R.DVLLNGVQPSR.A
	1588	599.8127	1197.6109	1197.6353	-20.38	0	41	7.6e-005	1		R.DVLLNGVQPSR.A 1589 1590
	1624	604.8159	1207.6172	1207.6053	9.82	0	154	3.9e-016	1	U	K.STMILNLCTR.Y
	1676	613.2569	1224.4992	1224.5016	-1.90	0	41	7.6e-005	1		R.ENPMGFSCQR.R
	1682	614.3190	1226.6234	1226.6407	-14.15	1	(154)	3.9e-016	1	U	K.KGYTQQLAYR.Q 1683
	1815	634.8663	1267.7180	1267.7176	0.32	0	15	0.031	1		R.LVAYYTLINAK.G
	1954	650.7957	1299.5768	1299.5805	-2.91	0	27	0.0021	1	U	K.ACEPGVDYVYK.T 1955
	2142	673.3511	1344.6876	1344.6926	-3.68	0	55	3.5e-006	1		R.EVVADSVWVDVK.D
	2243	685.8695	1369.7245	1369.7242	0.22	0	154	3.9e-016	1		K.TIYTPGSTVLYR.I 2240 2241 2242
	2285	693.4127	1384.8109	1384.8330	-15.95	0	15	0.029	1		K.SSLAVPYVIVPLK.T
	2679	743.4171	1484.8196	1484.8199	-0.20	1	154	3.9e-016	1		R.VVIEDGTGEAVLKR.D
	2794	760.3674	1518.7203	1518.7215	-0.79	0	103	4.6e-011	1		K.AGDFLEAHYNNLR.R
	2973	527.5839	1579.7298	1579.7341	-2.72	1	(154)	3.9e-016	1	U	R.FYHPEKEDGMLSK.L 2974
	3294	842.3650	1682.7154	1682.7246	-5.47	0	(154)	3.9e-016	1	U	K.VYSYYNLDETCTR.F 3295
	3592	894.4786	1786.9426	1786.9618	-10.73	0	(154)	3.9e-016	1		R.SGIPIVTSPYQIHFTK.T 3594
	3593	596.6574	1786.9504	1786.9618	-6.37	0	154	3.9e-016	1		R.SGIPIVTSPYQIHFTK.T 3596
	3693	906.9620	1811.9094	1811.9128	-1.85	0	154	3.9e-016	1		R.VELLYNPAFCSLATSK.R
	3729	610.6523	1828.9352	1828.9658	-16.74	0	41	7.6e-005	1	U	K.VHQYFNVGLIQPGMVK.V
	3762	919.5045	1836.9945	1836.9986	-2.22	0	154	3.9e-016	1		K.VVLVGAQSGYLFIQTDK.T
	3802	926.4600	1850.9055	1850.9163	-5.85	0	82	6.8e-009	1		K.GQSFVTVHASFGGTTVEK.V
	3961	953.5240	1905.0335	1905.0095	12.6	1	154	3.9e-016	1		K.DSITTWEILAVSLSDKK.G
	3962	636.0191	1905.0355	1905.0095	13.6	1	(15)	0.031	1		K.DSITTWEILAVSLSDKK.G
	4136	655.9894	1964.9463	1964.9705	-12.30	1	154	3.9e-016	1		K.NVDGTAFVIFGVQDGDRR.I 4133
	4137	983.4808	1964.9471	1964.9705	-11.89	1	(36)	0.00023	1		K.NVDGTAFVIFGVQDGDRR.I 4134
	4288	1018.6017	2035.1888	2035.1717	8.41	0	15	0.029	1	U	K.LYNVEATSYALLALLLLR.D
	4526	1078.5693	2155.1241	2155.1121	5.57	0	154	3.9e-016	1		R.IPVVTQGSNVQSLTQDDGVAK.L
	4536	1080.4912	2158.9679	2158.9754	-3.47	0	(154)	3.9e-016	1	U	R.EEVPAADLSDQVPDTESETK.I 4537
	4587	1095.1150	2188.2154	2188.1926	10.4	0	39	0.00011	1		K.VFALASNLIAIDSQVLCGAVK.W
	4854	771.4118	2311.2136	2311.2132	0.16	1	29	0.0013	1		R.RIPVVTQGSNVQSLTQDDGVAK.L
	5181	629.0632	2512.2238	2512.2281	-1.71	0	(41)	7.6e-005	1		K.TMQAHPYNTLGGSGNYLHLSVPR.M
	5183	838.4246	2512.2520	2512.2281	9.52	0	154	3.9e-016	1		K.TMQAHPYNTLGGSGNYLHLSVPR.M
	5218	633.0596	2528.2094	2528.2230	-5.39	0	(15)	0.029	1		K.TMQAHPYNTLGGSGNYLHLSVPR.M
	5308	862.1110	2583.3112	2583.2654	17.7	0	53	5.3e-006	1		K.FFKPAMPFDLMVFVTNPDGSPAR.R
	5370	880.1210	2637.3413	2637.3842	-16.29	0	135	2.9e-014	1	U	K.YLIWGVSSDLWGEKPNISYIIGK.D
	Proteins matching the same set of peptides:
	F7E454 Mass: 183620 Score: 4075 Matches: 69(58) Sequences: 44(38)
	Uncharacterized protein OS=Equus caballus OX=9796 GN=LOC100060539 PE=4 SV=1
10.	F6X1X3 Mass: 21514 Score: 3484 Matches: 32(28) Sequences: 4(4) emPAI: 5.57
	Vitelline membrane outer layer 1 homolog OS=Equus caballus OX=9796 GN=VMO1 PE=4 SV=1
	Query	Observed	Mr(expt)	Mr(calc)	ppm	Miss	Score	Expect	Rank	Unique	Peptide
	1965	434.8830	1301.6272	1301.6324	-4.01	1	(32)	0.00067	1	U	R.GLRDDTAVNDAR.F 1964 1967
	1966	651.8209	1301.6272	1301.6324	-4.00	1	(154)	3.9e-016	1	U	R.GLRDDTAVNDAR.F 1968 1969
	1980	652.3173	1302.6200	1302.6164	2.75	1	154	3.9e-016	1	U	R.GLRDDTAVNDAR.F
	3328	566.9374	1697.7903	1697.7969	-3.87	0	(154)	3.9e-016	1	U	R.GNAELNTHVVESESGR.W 3331 3332 3335 3339
	3329	849.9037	1697.7928	1697.7969	-2.39	0	(154)	3.9e-016	1	U	R.GNAELNTHVVESESGR.W 3330
	3333	850.3890	1698.7635	1698.7809	-10.22	0	(154)	3.9e-016	1	U	R.GNAELNTHVVESESGR.W
	3334	850.3962	1698.7778	1698.7809	-1.81	0	(154)	3.9e-016	1	U	R.GNAELNTHVVESESGR.W 3337
	3336	567.2690	1698.7853	1698.7809	2.60	0	(48)	1.4e-005	1	U	R.GNAELNTHVVESESGR.W
	3492	878.9111	1755.8076	1755.8210	-7.63	0	(154)	3.9e-016	1	U	R.VEAPMTPGDNTAANNVR.F 3493 3494
	3499	879.4094	1756.8042	1756.8050	-0.47	0	(15)	0.031	1	U	R.VEAPMTPGDNTAANNVR.F
	3544	886.9135	1771.8125	1771.8159	-1.94	0	(154)	3.9e-016	1	U	R.VEAPMTPGDNTAANNVR.F 3545 3546
	3548	887.4116	1772.8086	1772.7999	4.88	0	(41)	7.6e-005	1	U	R.VEAPMTPGDNTAANNVR.F
	3872	940.4806	1878.9466	1878.9436	1.63	0	(154)	3.9e-016	1	U	K.VEPQQGIPGDDTALNGIR.L 3873
	3882	940.9681	1879.9217	1879.9276	-3.11	0	(154)	3.9e-016	1	U	K.VEPQQGIPGDDTALNGIR.L 3884 3885 3886
11.	H9GZT5 Mass: 36409 Score: 3080 Matches: 38(32) Sequences: 13(11) emPAI: 3.40
	Uncharacterized protein OS=Equus caballus OX=9796 PE=4 SV=1
	Query	Observed	Mr(expt)	Mr(calc)	ppm	Miss	Score	Expect	Rank	Unique	Peptide
	623	417.2296	832.4446	832.4477	-3.66	0	32	0.00067	1	U	K.DVLMISR.T 624
	663	426.7498	851.4850	851.4865	-1.79	0	154	3.9e-016	1		K.ALPAPVER.T
	761	453.2585	904.5025	904.5052	-2.95	0	3	0.49	1		K.VSVTCLVK.D
	1216	542.8044	1083.5942	1083.6037	-8.71	0	5	0.32	1	U	R.TISKPTGQPR.E
	1287	554.3469	1106.6792	1106.6812	-1.80	0	(130)	9.5e-014	1	U	R.VVSILAIQHK.D
	1288	369.9005	1106.6798	1106.6812	-1.24	0	154	3.9e-016	1	U	R.VVSILAIQHK.D
	1425	574.3308	1146.6471	1146.6431	3.48	1	32	0.00067	1		K.NKVSVTCLVK.D 1424
	3519	588.6149	1762.8228	1762.8308	-4.57	0	(154)	3.9e-016	1		K.SQTYICNVAHPASSTK.V 3523
	3521	882.4197	1762.8249	1762.8308	-3.35	0	(154)	3.9e-016	1		K.SQTYICNVAHPASSTK.V 3522
	3619	598.6749	1793.0028	1793.0199	-9.58	1	154	3.9e-016	1	U	R.VVSILAIQHKDWLSGK.E
	3887	470.9970	1879.9589	1879.9792	-10.77	1	(154)	3.9e-016	1	U	R.EPQVYVLAPHRDELSK.N 3890
	3889	940.9952	1879.9758	1879.9792	-1.80	1	(154)	3.9e-016	1	U	R.EPQVYVLAPHRDELSK.N
	3892	627.6708	1879.9905	1879.9792	6.02	1	(150)	1.1e-015	1	U	R.EPQVYVLAPHRDELSK.N 3888 3891
	4408	702.6766	2105.0079	2105.0211	-6.30	1	41	7.6e-005	1		K.SQTYICNVAHPASSTKVDK.K
	4497	1071.9811	2141.9476	2141.9793	-14.81	0	(154)	3.9e-016	1	U	K.YSTTPAQLDSDGSYFLYSK.L 4498 4499 4500 4501 4502
	5562	698.0664	2788.2365	2788.2486	-4.34	0	(154)	3.9e-016	1	U	R.WQQGTTFTCAVMHEALHNHYTEK.S 5563 5564 5565 5566
	5569	930.4316	2788.2729	2788.2486	8.72	0	(41)	7.6e-005	1	U	R.WQQGTTFTCAVMHEALHNHYTEK.S 5568
	5584	702.0573	2804.1999	2804.2435	-15.56	0	(32)	0.00067	1	U	R.WQQGTTFTCAVMHEALHNHYTEK.S
	5587	561.8502	2804.2144	2804.2435	-10.38	0	(6)	0.27	1	U	R.WQQGTTFTCAVMHEALHNHYTEK.S
	5588	935.7529	2804.2370	2804.2435	-2.34	0	(10)	0.11	1	U	R.WQQGTTFTCAVMHEALHNHYTEK.S
	6273	1041.0153	4160.0319	4159.9474	20.3	0	154	3.9e-016	1	U	R.TPTVTCVVVDVGHDFPDVQFNWYVDGVETHTATTEPK.Q
12.	H9GZU9 Mass: 35818 Score: 2595 Matches: 24(23) Sequences: 8(8) emPAI: 2.16
	Uncharacterized protein OS=Equus caballus OX=9796 PE=4 SV=1
	Query	Observed	Mr(expt)	Mr(calc)	ppm	Miss	Score	Expect	Rank	Unique	Peptide
	663	426.7498	851.4850	851.4865	-1.79	0	154	3.9e-016	1		K.ALPAPVER.T
	1328	560.8066	1119.5987	1119.5958	2.61	0	32	0.00067	1		K.NTVSVTCLVK.D
	3667	903.5016	1804.9886	1804.9836	2.79	0	(154)	3.9e-016	1		R.VVSVLPIQHQDWLSGK.E
	3668	602.6702	1804.9889	1804.9836	2.92	0	154	3.9e-016	1		R.VVSVLPIQHQDWLSGK.E
	4496	1071.5052	2140.9959	2140.9953	0.30	0	(154)	3.9e-016	1	U	K.YSTTPAQLNSDGSYFLYSK.L
	4497	1071.9811	2141.9476	2141.9793	-14.80	0	(154)	3.9e-016	1	U	K.YSTTPAQLNSDGSYFLYSK.L 4498 4499 4500 4501 4502
	5065	818.0214	2451.0423	2451.0583	-6.57	0	(154)	3.9e-016	1	U	K.QGESFTCGVMHEAVENHYTQK.N 5069
	5066	613.7681	2451.0434	2451.0583	-6.10	0	(154)	3.9e-016	1	U	K.QGESFTCGVMHEAVENHYTQK.N 5068
	5084	617.7706	2467.0532	2467.0533	-0.04	0	(102)	6.6e-011	1	U	K.QGESFTCGVMHEAVENHYTQK.N
	5371	881.3726	2641.0960	2641.1609	-24.54	0	154	3.9e-016	1	U	K.DFYPPEIDVEWQSNEHPEPEGK.Y 5373 5374
	5375	1321.5709	2641.1273	2641.1609	-12.71	0	(14)	0.039	1	U	K.DFYPPEIDVEWQSNEHPEPEGK.Y 5372
	5525	692.3140	2765.2268	2765.2326	-2.12	1	154	3.9e-016	1	U	R.WKQGESFTCGVMHEAVENHYTQK.N
	5604	705.8381	2819.3234	2819.3483	-8.82	0	(154)	3.9e-016	1	U	K.GDIHTFPLDLSNSAHHSLSSMMAVPR.S 5605
13.	F6SJK9 Mass: 39128 Score: 2369 Matches: 31(29) Sequences: 15(14) emPAI: 4.06
	Uncharacterized protein OS=Equus caballus OX=9796 PE=3 SV=1
	Query	Observed	Mr(expt)	Mr(calc)	ppm	Miss	Score	Expect	Rank	Unique	Peptide
	571	404.2023	806.3900	806.3923	-2.74	0	126	2.4e-013	1		R.LAADDFR.L
	575	405.2217	808.4289	808.4330	-5.09	0	32	0.00067	1		R.LASYLDK.V
	1064	516.2958	1030.5770	1030.5910	-13.60	0	21	0.0074	1	U	R.VLDELTLTK.A
	1167	532.8060	1063.5975	1063.6026	-4.76	1	63	5.1e-007	1		R.LASYLDKVR.A 1168
	1236	545.7662	1089.5178	1089.5237	-5.40	0	154	3.9e-016	1	U	K.VTMQNLNDR.L 1235 1237
	1238	546.2597	1090.5049	1090.5077	-2.60	0	(41)	7.6e-005	1	U	K.VTMQNLNDR.L
	1291	555.2486	1108.4826	1108.4825	0.11	0	10	0.09	1	U	K.DAEAWFNEK.S 1290
	1482	583.2944	1164.5742	1164.5775	-2.81	0	154	3.9e-016	1	U	R.LENEIQTYR.S 1484
	1558	594.3476	1186.6806	1186.6921	-9.68	1	41	7.6e-005	1	U	R.RVLDELTLTK.A
	1600	601.3100	1200.6054	1200.6098	-3.67	0	(154)	3.9e-016	1		R.QSVEADINGLR.R 1601
	1605	601.8044	1201.5942	1201.5939	0.30	0	(32)	0.00067	1		R.QSVEADINGLR.R
	2194	453.2412	1356.7019	1356.7110	-6.68	1	(32)	0.00067	1		R.QSVEADINGLRR.V
	2196	679.3591	1356.7037	1356.7110	-5.34	1	(154)	3.9e-016	1		R.QSVEADINGLRR.V 2197
	2205	679.8519	1357.6893	1357.6950	-4.17	1	(32)	0.00067	1		R.QSVEADINGLRR.V
	2273	691.3203	1380.6261	1380.6408	-10.69	0	(154)	3.9e-016	1	U	R.ALEESNYELEGK.I 2274 2275
	2301	695.8423	1389.6700	1389.6736	-2.54	0	154	3.9e-016	1	U	K.QSLEASLAETEGR.Y 2300
	2464	717.8859	1433.7572	1433.7626	-3.81	1	126	2.5e-013	1	U	K.IRLENEIQTYR.S
	2465	478.9280	1433.7623	1433.7626	-0.24	1	(15)	0.029	1	U	K.IRLENEIQTYR.S
	4392	1048.5376	2095.0606	2095.0394	10.1	0	92	6.5e-010	1	U	K.ADLEMQIESLTEELAYLK.K
	4657	742.0533	2223.1380	2223.1344	1.64	1	(154)	3.9e-016	1	U	K.ADLEMQIESLTEELAYLKK.N
	4702	747.3912	2239.1517	2239.1293	10.00	1	154	3.9e-016	1	U	K.ADLEMQIESLTEELAYLKK.N
	Proteins matching the same set of peptides:
	F6SQQ0 Mass: 42063 Score: 2369 Matches: 31(29) Sequences: 15(14)
	Uncharacterized protein OS=Equus caballus OX=9796 PE=3 SV=1
	F6SS14 Mass: 49929 Score: 2369 Matches: 31(29) Sequences: 15(14)
	Uncharacterized protein OS=Equus caballus OX=9796 PE=3 SV=1
	F6WDW3 Mass: 42694 Score: 2369 Matches: 31(29) Sequences: 15(14)
	Uncharacterized protein OS=Equus caballus OX=9796 PE=3 SV=1
14.	F7DJZ1 Mass: 51400 Score: 2298 Matches: 25(24) Sequences: 16(16) emPAI: 2.26
	BPI fold containing family B member 1 OS=Equus caballus OX=9796 GN=BPIFB1 PE=4 SV=1
	Query	Observed	Mr(expt)	Mr(calc)	ppm	Miss	Score	Expect	Rank	Unique	Peptide
	823	465.7764	929.5382	929.5368	1.55	0	154	3.9e-016	1	U	R.LPLLSTMR.E 822 824
	1318	559.3150	1116.6155	1116.6213	-5.22	0	41	7.6e-005	1	U	K.LSSGIPVSMVK.A
	1719	620.8247	1239.6349	1239.6499	-12.16	0	154	3.9e-016	1	U	R.FSFLVNSLADK.V
	1961	434.5817	1300.7234	1300.7252	-1.39	0	154	3.9e-016	1	U	K.HDVIQLHLQAK.L
	1962	651.3694	1300.7243	1300.7252	-0.63	0	(3)	0.47	1	U	K.HDVIQLHLQAK.L
	2320	698.8788	1395.7431	1395.7510	-5.66	1	120	1.1e-012	1	U	R.RFSFLVNSLADK.V
	2657	494.2673	1479.7800	1479.7834	-2.30	1	154	3.9e-016	1	U	K.LKDHDAVDILWR.L 2656
	3373	856.4551	1710.8956	1710.9152	-11.46	0	(154)	3.9e-016	1	U	K.IVTQETPELLLDQGR.A 3374
	3541	885.4819	1768.9493	1768.9571	-4.39	0	(154)	3.9e-016	1	U	K.VISETAADQLGPTQIVK.I 3542
	3550	887.5203	1773.0261	1773.0036	12.7	0	154	3.9e-016	1	U	K.VAQLIVLEVFATSEVR.R
	3822	929.4509	1856.8872	1856.9124	-13.59	0	32	0.00067	1	U	K.SIVEMHMETEAQAIIR.V
	3931	633.0123	1896.0152	1896.0179	-1.44	0	(32)	0.00067	1	U	R.IHLMNSGIGLFDPELLK.D
	3932	949.0150	1896.0155	1896.0179	-1.27	0	40	9.7e-005	1	U	R.IHLMNSGIGLFDPELLK.D
	3993	959.0031	1915.9916	1915.9561	18.5	0	15	0.029	1	U	K.DITAEMLTSALLPNENGK.L
	4147	986.5670	1971.1194	1971.0863	16.8	0	(41)	7.6e-005	1	U	R.EKPAGGNPILGSLVTFLMK.Y
	4148	658.0474	1971.1203	1971.0863	17.2	0	154	3.9e-016	1	U	R.EKPAGGNPILGSLVTFLMK.Y
	4547	1083.6108	2165.2071	2165.1732	15.7	0	(154)	3.9e-016	1	U	R.VPVSLSSDHLQFDLLSPAIK.H
	4548	722.7432	2165.2078	2165.1732	16.0	0	154	3.9e-016	1	U	R.VPVSLSSDHLQFDLLSPAIK.H
	4983	798.0720	2391.1942	2391.1562	15.9	1	154	3.9e-016	1	U	K.SQLCPVIEAAFEDMREDLLR.L
	5064	1226.1556	2450.2967	2450.3380	-16.86	0	154	3.9e-016	1	U	K.VTSANILQLQIQPSADGQELVVK.V
15.	F6RMD0 Mass: 85930 Score: 2176 Matches: 26(24) Sequences: 20(19) emPAI: 1.11
	Uncharacterized protein OS=Equus caballus OX=9796 GN=CFB PE=3 SV=1
	Query	Observed	Mr(expt)	Mr(calc)	ppm	Miss	Score	Expect	Rank	Unique	Peptide
	659	425.2421	848.4697	848.4756	-6.95	0	15	0.029	1	U	K.GGSFQLLK.E
	902	483.7484	965.4822	965.4818	0.42	0	154	3.9e-016	1	U	K.STGSWSTLK.T
	959	497.2836	992.5527	992.5542	-1.53	0	154	3.9e-016	1	U	K.ALFVSELSK.E 958
	1116	524.2327	1046.4508	1046.4491	1.58	0	15	0.029	1	U	R.CYDGYTLR.G 1115
	1244	547.2979	1092.5813	1092.5928	-10.51	0	(154)	3.9e-016	1	U	R.GDSGGPLIIHK.R 1247
	1387	569.2537	1136.4928	1136.4986	-5.11	0	154	3.9e-016	1	U	R.SSDADWVTEK.L 1388
	1636	606.3329	1210.6512	1210.6598	-7.07	0	40	0.00011	1	U	R.YGLVTYATVPK.V
	1755	624.2964	1246.5782	1246.5829	-3.79	0	(154)	3.9e-016	1	U	K.LNEISYEDHK.L
	1756	416.5337	1246.5793	1246.5829	-2.90	0	154	3.9e-016	1	U	K.LNEISYEDHK.L
	2131	672.8241	1343.6336	1343.6357	-1.55	1	41	7.6e-005	1	U	R.DAQYASGYDKVK.D
	2306	696.8057	1391.5968	1391.6027	-4.27	0	154	3.9e-016	1	U	R.LEDSVTYYCSR.G
	2562	486.8925	1457.6556	1457.6908	-24.11	0	154	3.9e-016	1	U	R.TLGLCGMVWEHR.K
	3031	801.3672	1600.7198	1600.7167	1.98	0	41	7.6e-005	1	U	K.CPSGFYPYPMQVR.T 3032
	3543	590.6721	1768.9945	1768.9665	15.9	0	152	6.9e-016	1	U	R.DFHINLFQVLPWLK.E
	4074	971.4262	1940.8379	1940.8509	-6.74	0	154	3.9e-016	1	U	R.FLCTGGVNPYADPNTCR.G
	4092	650.9560	1949.8462	1949.8479	-0.88	0	40	9.9e-005	1	U	R.CPRPQDFENGEYWPR.A
	4380	1044.0413	2086.0680	2086.0371	14.8	0	11	0.088	1	U	K.DLEIAEVLFHPNYNINGK.K
	4538	1080.5022	2158.9898	2159.0391	-22.81	0	154	3.9e-016	1	U	R.LPWSTTCQQQMEELLPAK.D
	5402	888.1136	2661.3189	2661.3367	-6.67	0	67	2e-007	1	U	K.LTYGQTLRPICLPCTEGTNQALR.L
	5440	1346.0793	2690.1441	2690.1854	-15.32	0	154	3.9e-016	1	U	R.WDGQTAICDDGAGYCPNPGIPLGTR.K
	5787	754.8632	3015.4235	3015.4331	-3.18	1	152	6.8e-016	1	U	R.FLCTGGVNPYADPNTCRGDSGGPLIIHK.R
16.	F6RI47 Mass: 164072 Score: 2039 Matches: 28(22) Sequences: 23(19) emPAI: 0.48
	Alpha-2-macroglobulin OS=Equus caballus OX=9796 GN=A2M PE=4 SV=1
	Query	Observed	Mr(expt)	Mr(calc)	ppm	Miss	Score	Expect	Rank	Unique	Peptide
	718	442.2799	882.5453	882.5538	-9.64	0	41	7.6e-005	1		R.DLKPAIVK.V 719
	724	443.7241	885.4337	885.4345	-0.87	0	40	9.4e-005	1	U	K.YGAATFTR.T
	1230	544.7828	1087.5510	1087.5550	-3.66	0	121	7.7e-013	1	U	R.VPDTITEWK.A
	1314	558.8055	1115.5965	1115.5975	-0.88	0	127	2e-013	1	U	R.QTVSWAVTPK.S
	1341	561.8040	1121.5935	1121.5968	-2.99	0	41	7.6e-005	1	U	R.SLFTDLVAEK.D
	1441	576.8663	1151.7181	1151.7278	-8.38	0	154	3.9e-016	1	U	R.LLLQQISLPK.V 1442
	1598	601.2570	1200.4995	1200.4982	1.07	0	78	1.5e-008	1	U	K.YSNPSNCFGR.E
	1604	601.7994	1201.5843	1201.5802	3.47	0	123	4.9e-013	1	U	K.GCVYLQTSFK.Y
	1627	605.8181	1209.6216	1209.6353	-11.39	0	154	3.9e-016	1	U	K.LPPNVVEESAR.A
	1640	606.8140	1211.6135	1211.6121	1.15	0	40	0.0001	1	U	K.SFVHLEPMPR.E
	1971	651.8438	1301.6729	1301.6762	-2.47	0	6	0.27	1		R.VTASPQSLCALR.A 1972
	2117	670.3259	1338.6373	1338.6337	2.71	0	154	3.9e-016	1	U	R.TGMSAEVTIESSK.F
	2340	468.2744	1401.8012	1401.8054	-2.98	0	154	3.9e-016	1	U	K.MVSGFVPLKPTVK.T
	2485	721.3329	1440.6512	1440.6456	3.89	0	(41)	7.6e-005	1	U	K.VCTQHEYFTTR.K
	2486	481.2283	1440.6631	1440.6456	12.1	0	154	3.9e-016	1	U	K.VCTQHEYFTTR.K
	2580	730.8576	1459.7007	1459.7154	-10.13	0	154	3.9e-016	1	U	K.IQEEGTEVELTGR.G
	2595	733.3790	1464.7434	1464.7613	-12.22	0	41	7.6e-005	1	U	R.SEGNTWLTAFVLK.T
	2797	762.4113	1522.8080	1522.7814	17.5	0	154	3.9e-016	1	U	R.ASFSVLGDILGSAMR.D
	3119	541.2875	1620.8406	1620.8471	-4.02	1	9	0.13	1	U	R.EIHVSEPPTETVRK.Y
	3398	574.6239	1720.8499	1720.8645	-8.50	0	6	0.27	1	U	K.EDNSVHWTRPQKPK.A
	3869	939.9592	1877.9038	1877.9054	-0.86	0	(154)	3.9e-016	1	U	K.FSQQLNNQGCLSQQVK.T 3870
	4003	641.3650	1921.0731	1921.1135	-21.03	1	6	0.27	1	U	K.KDTIIKPLLVEPEGLEK.E
	4755	759.7540	2276.2401	2276.2416	-0.69	0	154	3.9e-016	1	U	K.ESLVFVQTDKPIYKPGQTVK.F
	5659	962.1914	2883.5524	2883.5667	-4.96	0	35	0.00032	1	U	R.AVDQSVLLMKPEAELSPASVYSLLPVK.D
17.	H9GZQ9 Mass: 37414 Score: 1981 Matches: 26(21) Sequences: 14(11) emPAI: 2.01
	Uncharacterized protein OS=Equus caballus OX=9796 PE=4 SV=1
	Query	Observed	Mr(expt)	Mr(calc)	ppm	Miss	Score	Expect	Rank	Unique	Peptide
	761	453.2585	904.5025	904.5052	-2.95	0	3	0.49	1		K.VSVTCLVK.D
	1330	560.8227	1119.6308	1119.6322	-1.21	1	10	0.099	1		K.SKVSVTCLVK.D
	1571	596.2979	1190.5812	1190.5931	-10.04	0	15	0.031	1	U	R.IEPIPNNHQK.V
	1632	404.5436	1210.6091	1210.6095	-0.31	0	(15)	0.031	1	U	R.IQHQDWLSGK.E
	1633	606.3127	1210.6108	1210.6095	1.11	0	41	7.6e-005	1	U	R.IQHQDWLSGK.E
	2155	449.5765	1345.7076	1345.7102	-1.93	1	3	0.47	1	U	K.RIEPIPNNHQK.V
	2263	689.8839	1377.7531	1377.7364	12.1	0	(154)	3.9e-016	1	U	K.VNNQALPQPIER.T 2264
	2270	690.3638	1378.7130	1378.7204	-5.41	0	(12)	0.057	1	U	K.VNNQALPQPIER.T
	2378	708.3162	1414.6179	1414.6340	-11.37	0	82	5.8e-009	1	U	K.FNWYMDGVEVR.T 2377 2379
	4290	1019.0163	2036.0180	2036.0215	-1.68	0	(154)	3.9e-016	1	U	R.SQEPQVYVLAPHPDELSK.S 4291
	4292	679.6813	2036.0220	2036.0215	0.27	0	(154)	3.9e-016	1	U	R.SQEPQVYVLAPHPDELSK.S 4289 4294
	4435	1058.0251	2114.0357	2114.0202	7.36	0	154	3.9e-016	1		R.TPEVTCVVVDVSQENPDVK.F
	4484	1069.0693	2136.1241	2136.1078	7.65	0	154	3.9e-016	1	U	K.CPAPELLGGPSVFIFPPNPK.D
	4578	1094.9869	2187.9593	2187.9597	-0.15	0	(154)	3.9e-016	1	U	K.YSTTQAQQDSDGSYFLYSK.L 4579
	4716	563.2898	2249.1301	2249.1440	-6.20	1	23	0.0054	1	U	K.GRSQEPQVYVLAPHPDELSK.S
	5357	1317.6355	2633.2564	2633.2285	10.6	0	154	3.9e-016	1	U	K.DFYPPEINIEWQSNGQPELETK.Y
	5361	1318.1375	2634.2604	2634.2125	18.1	0	(4)	0.37	1	U	K.DFYPPEINIEWQSNGQPELETK.Y
	5531	694.3173	2773.2402	2773.2490	-3.17	0	154	3.9e-016	1	U	R.WQQGTTFTCGVMHEALHNHYTQK.N 5532
18.	F7CPJ5 Mass: 21557 Score: 1853 Matches: 18(17) Sequences: 9(8) emPAI: 3.26
	Uncharacterized protein OS=Equus caballus OX=9796 GN=LOC100053601 PE=3 SV=1
	Query	Observed	Mr(expt)	Mr(calc)	ppm	Miss	Score	Expect	Rank	Unique	Peptide
	671	431.2611	860.5077	860.5120	-4.96	0	18	0.017	1	U	R.VFVDLIR.A
	978	500.2473	998.4801	998.4821	-2.06	0	32	0.00067	1	U	K.YDGYNVLR.I
	2024	659.3370	1316.6595	1316.6572	1.77	0	(154)	3.9e-016	1	U	K.ENIIDLTQTDR.C 2025
	3033	801.8823	1601.7501	1601.7573	-4.48	0	154	3.9e-016	1		R.ALDNSSLYAEYQTK.V
	3210	549.2756	1644.8051	1644.8246	-11.90	1	(154)	3.9e-016	1		R.EPDVSPEIKEEFVK.I 3212 3213
	3211	823.4212	1644.8279	1644.8246	1.95	1	(154)	3.9e-016	1		R.EPDVSPEIKEEFVK.I 3214
	3380	857.9537	1713.8929	1713.8614	18.4	0	32	0.00067	1		K.ISGEWYSIFLASDVK.E
	3780	614.9938	1841.9597	1841.9847	-13.57	1	154	3.9e-016	1	U	K.QGIVKENIIDLTQTDR.C
	4146	986.5258	1971.0370	1970.9989	19.3	1	9	0.13	1		K.ISGEWYSIFLASDVKEK.I
	5398	888.0703	2661.1891	2661.2116	-8.45	1	(154)	3.9e-016	1	U	K.VNGECTEFSVVADKTEEDGVYSVK.Y 5399 5403
	5406	888.4112	2662.2118	2662.1956	6.06	1	154	3.9e-016	1	U	K.VNGECTEFSVVADKTEEDGVYSVK.Y 5404
19.	H9GZV1 Mass: 35602 Score: 1833 Matches: 18(17) Sequences: 6(6) emPAI: 1.23
	Uncharacterized protein OS=Equus caballus OX=9796 PE=4 SV=1
	Query	Observed	Mr(expt)	Mr(calc)	ppm	Miss	Score	Expect	Rank	Unique	Peptide
	1649	609.3364	1216.6583	1216.6663	-6.58	0	119	1.2e-012	1	U	K.ESQTVSITKPK.E 1648
	2100	667.8772	1333.7398	1333.7071	24.6	0	154	3.9e-016	1	U	K.GFFPLGFPEPVK.V
	2101	668.2942	1334.5738	1334.5925	-13.99	0	41	7.6e-005	1	U	K.CEVQHYTSPSK.S 2108
	2103	445.8709	1334.5910	1334.5925	-1.13	0	(15)	0.031	1	U	K.CEVQHYTSPSK.S
	3281	558.9253	1673.7541	1673.7654	-6.79	0	(154)	3.9e-016	1	U	R.GDVFSCMVGHEALPR.D 3282
	3731	610.9614	1829.8625	1829.8665	-2.22	1	(154)	3.9e-016	1	U	K.RGDVFSCMVGHEALPR.D 3732
	4896	779.0313	2334.0721	2334.0984	-11.28	0	(154)	3.9e-016	1	U	R.LSGKPTHVNVSVVMAEADGTCY.- 4898 4899 4900 4901
	4903	1168.0597	2334.1048	2334.0984	2.74	0	(41)	7.6e-005	1	U	R.LSGKPTHVNVSVVMAEADGTCY.-
	4920	784.3651	2350.0733	2350.0934	-8.52	0	(154)	3.9e-016	1	U	R.LSGKPTHVNVSVVMAEADGTCY.- 4921
20.	F6XWM5 Mass: 38310 Score: 1810 Matches: 26(23) Sequences: 13(11) emPAI: 2.19
	Haptoglobin OS=Equus caballus OX=9796 PE=3 SV=1
	Query	Observed	Mr(expt)	Mr(calc)	ppm	Miss	Score	Expect	Rank	Unique	Peptide
	499	379.2255	756.4365	756.4381	-2.17	0	11	0.083	1	U	K.DIAPTLK.L 498
	749	450.2726	898.5307	898.5488	-20.05	0	(41)	7.6e-005	1	U	R.IIGGLLDAK.G 750
	798	460.7333	919.4521	919.4552	-3.35	0	3	0.47	1	U	K.GSFPWQAK.L
	923	490.7508	979.4870	979.4876	-0.62	0	102	6.4e-011	1	U	R.VGYVSGWGR.N 924 925
	1542	592.8365	1183.6585	1183.6601	-1.32	0	(154)	3.9e-016	1	U	K.VPSILDWVQK.T 1543
	2140	673.3298	1344.6450	1344.6384	4.92	0	41	7.6e-005	1	U	K.SCAVAEYGVYVK.V 2138 2139
	2238	684.8180	1367.6214	1367.6205	0.71	0	34	0.00042	1	U	R.SEGDGVYALNSEK.Q
	2288	463.2257	1386.6554	1386.6635	-5.88	0	76	2.6e-008	1	U	K.LPECEAVCGKPK.N
	2289	694.3373	1386.6601	1386.6635	-2.46	0	(18)	0.016	2	U	K.LPECEAVCGKPK.N
	3064	804.8947	1607.7749	1607.7865	-7.25	0	(154)	3.9e-016	1	U	K.YVTLPVADQDTCVK.H 3065
	3734	611.3031	1830.8875	1830.8968	-5.09	1	154	3.9e-016	1	U	K.ASGTKLPECEAVCGKPK.N 3733
	3753	611.9804	1832.9194	1832.9277	-4.53	1	154	3.9e-016	1	U	R.VMPICLPSKDYAQVGR.V
	3859	624.6644	1870.9713	1870.9829	-6.22	0	154	3.9e-016	1	U	K.VVFHPDYQEVDIGLIK.L
	3860	936.4949	1870.9753	1870.9829	-4.06	0	(15)	0.031	1	U	K.VVFHPDYQEVDIGLIK.L
	4508	715.3626	2143.0660	2143.0732	-3.36	0	(154)	3.9e-016	1	U	R.SSVGVQPILNEHTFCAGLSK.F 4510
	4509	1072.5540	2143.0934	2143.0732	9.41	0	(154)	3.9e-016	1	U	R.SSVGVQPILNEHTFCAGLSK.F
21.	F6VE37 Mass: 16703 Score: 1701 Matches: 20(17) Sequences: 4(2) emPAI: 1.10
	Uncharacterized protein OS=Equus caballus OX=9796 GN=LOC100054161 PE=3 SV=1
	Query	Observed	Mr(expt)	Mr(calc)	ppm	Miss	Score	Expect	Rank	Unique	Peptide
	1912	644.8714	1287.7282	1287.7339	-4.42	0	8	0.17	1	U	R.LLIVYPWTQR.F
	3647	451.2376	1800.9215	1800.9271	-3.15	0	(154)	3.9e-016	1		K.VLHSFGEGVHHLDNLK.D 3646 3648 3650 3652 3654 3657 3658 3660
	3653	601.3171	1800.9296	1800.9271	1.37	0	(154)	3.9e-016	1		K.VLHSFGEGVHHLDNLK.D 3651 3656 3659
	4024	483.2579	1929.0025	1929.0221	-10.14	1	(154)	3.9e-016	1		K.KVLHSFGEGVHHLDNLK.D 4026 4027 4031
	4029	644.0111	1929.0115	1929.0221	-5.49	1	(154)	3.9e-016	1		K.KVLHSFGEGVHHLDNLK.D
	4890	776.0804	2325.2193	2325.2328	-5.81	1	3	0.48	2	U	K.TAILALWGKVNEEEIGGEALGR.V
22.	F6ZEQ3 Mass: 50796 Score: 1662 Matches: 21(20) Sequences: 13(12) emPAI: 1.57
	Keratin 16 OS=Equus caballus OX=9796 GN=KRT16 PE=3 SV=1
	Query	Observed	Mr(expt)	Mr(calc)	ppm	Miss	Score	Expect	Rank	Unique	Peptide
	571	404.2023	806.3900	806.3923	-2.74	0	126	2.4e-013	1		R.LAADDFR.T
	575	405.2217	808.4289	808.4330	-5.09	0	32	0.00067	1		R.LASYLDK.V
	1051	515.2989	1028.5832	1028.5866	-3.27	0	(32)	0.00067	1		R.VLDELTLAR.T 1052
	1087	518.7701	1035.5257	1035.5250	0.71	1	6	0.23	1		K.IRDWYQR.Q
	1167	532.8060	1063.5975	1063.6026	-4.76	1	63	5.1e-007	1		R.LASYLDKVR.A 1168
	1340	561.7924	1121.5703	1121.5717	-1.22	0	143	4.8e-015	1		R.LEQEIATYR.R
	1600	601.3100	1200.6054	1200.6098	-3.67	0	(154)	3.9e-016	1		R.QSVEADINGLR.R 1601
	1605	601.8044	1201.5942	1201.5939	0.30	0	(32)	0.00067	1		R.QSVEADINGLR.R
	1658	610.8030	1219.5914	1219.5932	-1.45	0	154	3.9e-016	1		K.ASLENSLEETK.G 1659
	2194	453.2412	1356.7019	1356.7110	-6.68	1	(32)	0.00067	1		R.QSVEADINGLRR.V
	2196	679.3591	1356.7037	1356.7110	-5.34	1	(154)	3.9e-016	1		R.QSVEADINGLRR.V 2197
	2205	679.8519	1357.6893	1357.6950	-4.17	1	(32)	0.00067	1		R.QSVEADINGLRR.V
	2268	690.3622	1378.7099	1378.7204	-7.62	1	154	3.9e-016	1		K.TRLEQEIATYR.R
	2463	478.5779	1432.7117	1432.7157	-2.81	1	154	3.9e-016	1		K.ASLENSLEETKGR.Y
	3934	633.2978	1896.8715	1896.8709	0.33	1	71	8e-008	1	U	R.ILNEMRDQYEQMAEK.N
	4382	1044.4773	2086.9400	2086.9590	-9.07	0	154	3.9e-016	1	U	R.GQTGGDVNVEMDAAPGVDLSR.I
23.	F6V5H1 Mass: 11238 Score: 1635 Matches: 14(12) Sequences: 5(4) emPAI: 5.53
	Immunoglobulin kappa constant OS=Equus caballus OX=9796 GN=IGKC PE=4 SV=1
	Query	Observed	Mr(expt)	Mr(calc)	ppm	Miss	Score	Expect	Rank	Unique	Peptide
	643	422.7591	843.5036	843.5066	-3.54	0	10	0.11	1	U	K.TLSSPLVK.S
	2851	770.3943	1538.7740	1538.7828	-5.70	0	150	1e-015	1	U	K.DNTYSLSSTLTLPK.A 2852
	2886	518.5730	1552.6972	1552.7005	-2.17	0	(154)	3.9e-016	1	U	K.TSSFHSSLTEQDSK.D
	2887	777.3563	1552.6980	1552.7005	-1.65	0	(154)	3.9e-016	1	U	K.TSSFHSSLTEQDSK.D 2888
	3911	473.9586	1891.8051	1891.8159	-5.69	0	(4)	0.37	1	U	K.ADYEAHNVYACEVSHK.T
	3912	946.9112	1891.8078	1891.8159	-4.26	0	(154)	3.9e-016	1	U	K.ADYEAHNVYACEVSHK.T 3915
	3913	631.6109	1891.8109	1891.8159	-2.65	0	(154)	3.9e-016	1	U	K.ADYEAHNVYACEVSHK.T 3916
	5871	769.3637	3073.4257	3073.4728	-15.30	1	(154)	3.9e-016	1	U	K.TSSFHSSLTEQDSKDNTYSLSSTLTLPK.A 5872
	5873	1025.4973	3073.4701	3073.4728	-0.86	1	154	3.9e-016	1	U	K.TSSFHSSLTEQDSKDNTYSLSSTLTLPK.A
24.	F6Z2L5 Mass: 30312 Score: 1591 Matches: 21(19) Sequences: 14(12) emPAI: 2.49
	Apolipoprotein A1 OS=Equus caballus OX=9796 GN=APOA1 PE=3 SV=1
	Query	Observed	Mr(expt)	Mr(calc)	ppm	Miss	Score	Expect	Rank	Unique	Peptide
	446	716.4175	715.4102	715.4116	-1.94	0	15	0.033	1	U	K.DLELVK.Q
	1030	511.2748	1020.5351	1020.5352	-0.09	0	148	1.5e-015	1	U	K.AHPALEDLR.Q 1029
	1076	517.2714	1032.5282	1032.5240	4.04	0	154	3.9e-016	1	U	K.VAPLSDEFR.E 1075
	1151	530.2836	1058.5526	1058.5430	9.06	0	109	1.3e-011	1	U	K.LTPLAEEMR.D
	1298	370.8823	1109.6251	1109.6305	-4.93	1	9	0.12	1	U	R.LRTHVESLR.V
	1671	611.8260	1221.6374	1221.6241	10.9	0	154	3.9e-016	1	U	K.ASFLAAIDEASK.Q 1670
	1716	619.2996	1236.5847	1236.5775	5.83	0	61	7.5e-007	1	U	K.WQEEVEVYR.Q 1715
	1776	626.8149	1251.6153	1251.6136	1.42	0	23	0.0048	1	U	K.VQPYLDDFQK.K
	1838	637.8401	1273.6657	1273.6666	-0.69	0	(154)	3.9e-016	1	U	R.VNLAPFSEELR.Q 1837 1839
	1970	651.8348	1301.6551	1301.6575	-1.84	1	15	0.029	1	U	K.DTEGLRQELNK.D
	2231	683.3459	1364.6773	1364.6724	3.59	1	154	3.9e-016	1	U	K.KWQEEVEVYR.Q
	2272	460.9083	1379.7030	1379.7085	-4.02	1	41	7.6e-005	1	U	K.VQPYLDDFQKK.W
	2370	706.8483	1411.6820	1411.6983	-11.57	0	(154)	3.9e-016	1	U	R.EYVAQFEASALGK.Q 2371
	3723	609.9595	1826.8566	1826.8799	-12.74	1	9	0.13	1	U	K.DSGREYVAQFEASALGK.Q
25.	F6T3Y8 Mass: 40647 Score: 1579 Matches: 19(18) Sequences: 9(9) emPAI: 1.37
	Actin, cytoplasmic 1 OS=Equus caballus OX=9796 GN=ACTB PE=3 SV=1
	Query	Observed	Mr(expt)	Mr(calc)	ppm	Miss	Score	Expect	Rank	Unique	Peptide
	1371	566.7615	1131.5084	1131.5197	-9.95	0	(41)	7.6e-005	1	U	R.GYSFTTTAER.E 1372
	1472	581.3143	1160.6141	1160.6111	2.61	0	32	0.00067	1		K.EITALAPSTMK.I
	1508	586.2881	1170.5616	1170.5638	-1.86	0	(154)	3.9e-016	1		R.HQGVMVGMGQK.D 1509
	1523	589.3069	1176.5992	1176.6060	-5.77	0	(15)	0.029	1		K.EITALAPSTMK.I
	1552	594.2825	1186.5505	1186.5587	-6.91	0	(10)	0.1	1		R.HQGVMVGMGQK.D
	2779	505.9182	1514.7329	1514.7419	-5.92	0	32	0.00067	1		K.IWHHTFYNELR.V
	2780	506.2382	1515.6928	1515.6954	-1.68	0	(154)	3.9e-016	1	U	K.QEYDESGPSIVHR.K 2781
	3606	895.9371	1789.8597	1789.8846	-13.92	0	(154)	3.9e-016	1		K.SYELPDGQVITIGNER.F 3607 3608 3609
	4101	652.0253	1953.0542	1953.0571	-1.50	0	154	3.9e-016	1	U	R.VAPEEHPVLLTEAPLNPK.A 4100
	5932	1061.8523	3182.5351	3182.6071	-22.62	0	154	3.9e-016	1		R.TTGIVMDSGDGVTHTVPIYEGYALPHAILR.L
	5933	796.6411	3182.5351	3182.6071	-22.61	0	(24)	0.0036	1		R.TTGIVMDSGDGVTHTVPIYEGYALPHAILR.L
	6040	843.9088	3371.6059	3371.6319	-7.70	1	41	7.6e-005	1	U	R.FRAPEALFQPSFLGMESSGIHETTFNSIMK.C
26.	F7CZ92 Mass: 42024 Score: 1528 Matches: 16(15) Sequences: 8(8) emPAI: 1.30
	Actin, alpha skeletal muscle OS=Equus caballus OX=9796 GN=ACTA1 PE=2 SV=1
	Query	Observed	Mr(expt)	Mr(calc)	ppm	Miss	Score	Expect	Rank	Unique	Peptide
	1472	581.3143	1160.6141	1160.6111	2.61	0	32	0.00067	1		K.EITALAPSTMK.I
	1508	586.2881	1170.5616	1170.5638	-1.86	0	(154)	3.9e-016	1		R.HQGVMVGMGQK.D 1509
	1523	589.3069	1176.5992	1176.6060	-5.77	0	(15)	0.029	1		K.EITALAPSTMK.I
	1552	594.2825	1186.5505	1186.5587	-6.91	0	(10)	0.1	1		R.HQGVMVGMGQK.D
	2742	500.9074	1499.7003	1499.7005	-0.10	0	69	1.4e-007	1	U	K.QEYDEAGPSIVHR.K
	2779	505.9182	1514.7329	1514.7419	-5.92	0	32	0.00067	1		K.IWHHTFYNELR.V
	3606	895.9371	1789.8597	1789.8846	-13.92	0	(154)	3.9e-016	1		K.SYELPDGQVITIGNER.F 3607 3608 3609
	4104	652.6855	1955.0346	1955.0364	-0.89	0	154	3.9e-016	1	U	R.VAPEEHPTLLTEAPLNPK.A
	4115	980.9514	1959.8882	1959.9036	-7.90	0	(41)	7.6e-005	1	U	K.YPIEHGIITNWDDMEK.I
	4119	654.3096	1959.9069	1959.9036	1.65	0	154	3.9e-016	1	U	K.YPIEHGIITNWDDMEK.I
	4732	1131.5096	2261.0047	2261.0093	-2.00	0	154	3.9e-016	1	U	K.DLYANNVMSGGTTMYPGIADR.M
	4759	1139.5148	2277.0150	2277.0042	4.75	0	(134)	4e-014	1	U	K.DLYANNVMSGGTTMYPGIADR.M
27.	H9GZU8 Mass: 35893 Score: 1499 Matches: 14(13) Sequences: 10(10) emPAI: 1.64
	Uncharacterized protein OS=Equus caballus OX=9796 PE=4 SV=1
	Query	Observed	Mr(expt)	Mr(calc)	ppm	Miss	Score	Expect	Rank	Unique	Peptide
	663	426.7498	851.4850	851.4865	-1.79	0	154	3.9e-016	1		R.ALPAPVER.T
	1328	560.8066	1119.5987	1119.5958	2.61	0	32	0.00067	1		K.NTVSVTCLVK.D
	2343	468.5646	1402.6719	1402.6771	-3.71	1	154	3.9e-016	1	U	R.IVIKEPCCCPK.C
	2961	526.2903	1575.8492	1575.8522	-1.88	0	154	3.9e-016	1	U	R.VVSVLPIQHQDWR.R
	3519	588.6149	1762.8228	1762.8308	-4.57	0	(154)	3.9e-016	1		K.SQTYICNVAHPASSTK.V 3523
	3521	882.4197	1762.8249	1762.8308	-3.35	0	(154)	3.9e-016	1		K.SQTYICNVAHPASSTK.V 3522
	3763	613.6277	1837.8614	1837.8635	-1.15	0	41	7.6e-005	1	U	K.FNWYVDGVEAHTATTK.A 3764
	4298	1021.5438	2041.0731	2041.0401	16.1	0	154	3.9e-016	1	U	R.QSSGLYSLSSMVTVPASSLK.S
	4408	702.6766	2105.0079	2105.0211	-6.30	1	41	7.6e-005	1		K.SQTYICNVAHPASSTKVDK.R
	4421	1056.9686	2111.9227	2111.9688	-21.81	0	154	3.9e-016	1		K.YSTTPAQLDGDGSYFLYSK.L
	4435	1058.0251	2114.0357	2114.0202	7.36	0	154	3.9e-016	1		R.TPEVTCVVVDVSQENPDVK.F
28.	A0A0B4J1C4 Mass: 17841 Score: 1475 Matches: 15(14) Sequences: 7(7) emPAI: 3.75
	Joining chain of multimeric IgA and IgM OS=Equus caballus OX=9796 GN=JCHAIN PE=4 SV=1
	Query	Observed	Mr(expt)	Mr(calc)	ppm	Miss	Score	Expect	Rank	Unique	Peptide
	779	456.2861	910.5577	910.5600	-2.49	0	32	0.00067	1	U	R.IIIPVNSR.E 778
	1163	532.2903	1062.5661	1062.5710	-4.55	0	(154)	3.9e-016	1	U	R.VPLTYGGQTK.I 1164
	1884	427.8778	1280.6116	1280.6223	-8.39	0	(15)	0.031	1	U	K.FVYHLSDLCK.K
	1886	641.3171	1280.6196	1280.6223	-2.14	0	154	3.9e-016	1	U	K.FVYHLSDLCK.K
	2772	504.2609	1509.7609	1509.7650	-2.67	1	154	3.9e-016	1	U	R.TKFVYHLSDLCK.K 2773
	3447	868.4309	1734.8473	1734.8788	-18.17	0	(154)	3.9e-016	1	U	R.IIPSPENPNEDILER.H 3448 3449
	3503	879.4341	1756.8536	1756.8567	-1.73	1	(154)	3.9e-016	1	U	K.CYTNRVPLTYGGQTK.I
	3505	586.6265	1756.8576	1756.8567	0.52	1	154	3.9e-016	1	U	K.CYTNRVPLTYGGQTK.I 3501
	6250	1341.8901	4022.6486	4022.7092	-15.07	1	154	3.9e-016	1	U	K.KCDPVEVELDNQVVTASQSNICDEESETCYAYDR.N
29.	F6PJX6 Mass: 35615 Score: 1397 Matches: 15(15) Sequences: 8(8) emPAI: 1.66
	Keratin 13 OS=Equus caballus OX=9796 GN=KRT13 PE=3 SV=1
	Query	Observed	Mr(expt)	Mr(calc)	ppm	Miss	Score	Expect	Rank	Unique	Peptide
	571	404.2023	806.3900	806.3923	-2.74	0	126	2.4e-013	1		R.LAADDFR.L
	575	405.2217	808.4289	808.4330	-5.09	0	32	0.00067	1		R.LASYLDK.V
	1167	532.8060	1063.5975	1063.6026	-4.76	1	63	5.1e-007	1		R.LASYLDKVR.A 1168
	1340	561.7924	1121.5703	1121.5717	-1.22	0	143	4.8e-015	1		R.LEQEIATYR.S
	1600	601.3100	1200.6054	1200.6098	-3.67	0	(154)	3.9e-016	1		R.QSVEADINGLR.R 1601
	1605	601.8044	1201.5942	1201.5939	0.30	0	(32)	0.00067	1		R.QSVEADINGLR.R
	1959	651.3306	1300.6466	1300.6510	-3.41	0	(154)	3.9e-016	1	U	R.ALEEANADLEVK.I 1960
	2194	453.2412	1356.7019	1356.7110	-6.68	1	(32)	0.00067	1		R.QSVEADINGLRR.V
	2196	679.3591	1356.7037	1356.7110	-5.34	1	(154)	3.9e-016	1		R.QSVEADINGLRR.V 2197
	2205	679.8519	1357.6893	1357.6950	-4.17	1	(32)	0.00067	1		R.QSVEADINGLRR.V
	2268	690.3622	1378.7099	1378.7204	-7.62	1	154	3.9e-016	1		K.TRLEQEIATYR.S
30.	F7CSL8 Mass: 46896 Score: 1194 Matches: 19(17) Sequences: 13(12) emPAI: 1.42
	Uncharacterized protein OS=Equus caballus OX=9796 PE=3 SV=1
	Query	Observed	Mr(expt)	Mr(calc)	ppm	Miss	Score	Expect	Rank	Unique	Peptide
	492	374.2250	746.4355	746.4327	3.81	0	6	0.27	1		K.SPLFVGK.V 491
	730	444.7573	887.5000	887.4964	4.11	0	76	2.3e-008	1		K.AVLTIDEK.G 729
	935	492.3085	982.6025	982.6063	-3.88	0	32	0.00067	1	U	R.ILPELGITK.V 934
	1374	567.3070	1132.5995	1132.6240	-21.70	0	41	7.6e-005	1		K.GILATFLENR.H
	1400	570.3578	1138.7010	1138.7074	-5.57	1	17	0.02	1	U	K.RILPELGITK.V
	1661	407.5560	1219.6463	1219.6449	1.16	1	41	7.6e-005	1	U	K.LVDKFQEDVK.N
	2119	447.2354	1338.6843	1338.6892	-3.63	0	15	0.03	1	U	K.GDTHTQILEGLR.F
	2206	679.8623	1357.7101	1357.7201	-7.41	0	(154)	3.9e-016	1	U	K.GTEAAGATIVEAIR.T 2207
	2592	733.3514	1464.6882	1464.6845	2.54	0	28	0.0015	1	U	K.QINDYVENGTQGK.I
	3022	799.4204	1596.8263	1596.8300	-2.34	0	154	3.9e-016	1		K.IAPNLADFAFSLYR.H
	4850	771.3730	2311.0971	2311.1120	-6.45	1	154	3.9e-016	1	U	K.NLYHSEAFSINFGDIEEAKK.Q
	5102	620.2816	2477.0971	2477.1023	-2.09	0	15	0.029	1		K.WEKPFEPESTTEQDFHVDEK.T
	5405	666.5600	2662.2109	2662.2187	-2.94	1	(154)	3.9e-016	1		K.GKWEKPFEPESTTEQDFHVDEK.T 5407
	5408	888.4145	2662.2216	2662.2187	1.10	1	154	3.9e-016	1		K.GKWEKPFEPESTTEQDFHVDEK.T
31.	F7ATL5 Mass: 41012 Score: 1124 Matches: 14(13) Sequences: 11(10) emPAI: 1.17
	Keratin 14 OS=Equus caballus OX=9796 GN=KRT14 PE=3 SV=1
	Query	Observed	Mr(expt)	Mr(calc)	ppm	Miss	Score	Expect	Rank	Unique	Peptide
	571	404.2023	806.3900	806.3923	-2.74	0	126	2.4e-013	1		R.LAADDFR.T
	575	405.2217	808.4289	808.4330	-5.09	0	32	0.00067	1		R.LASYLDK.V
	1051	515.2989	1028.5832	1028.5866	-3.27	0	(32)	0.00067	1		R.VLDELTLAR.T 1052
	1087	518.7701	1035.5257	1035.5250	0.71	1	6	0.23	1		K.IRDWYQR.Q
	1167	532.8060	1063.5975	1063.6026	-4.76	1	63	5.1e-007	1		R.LASYLDKVR.A 1168
	1340	561.7924	1121.5703	1121.5717	-1.22	0	143	4.8e-015	1		R.LEQEIATYR.R
	1658	610.8030	1219.5914	1219.5932	-1.45	0	154	3.9e-016	1		K.ASLENSLEETK.G 1659
	2216	681.3478	1360.6810	1360.6834	-1.77	0	154	3.9e-016	1		R.EVATNSELVQSGK.S
	2268	690.3622	1378.7099	1378.7204	-7.62	1	154	3.9e-016	1		K.TRLEQEIATYR.R
	2463	478.5779	1432.7117	1432.7157	-2.81	1	154	3.9e-016	1		K.ASLENSLEETKGR.Y
	4399	702.0187	2103.0342	2103.0444	-4.83	1	154	3.9e-016	1		K.TEELNREVATNSELVQSGK.S
32.	F7DJE3 Mass: 38252 Score: 1104 Matches: 13(12) Sequences: 7(7) emPAI: 0.94
	Surfactant protein D OS=Equus caballus OX=9796 GN=SFTPD PE=4 SV=1
	Query	Observed	Mr(expt)	Mr(calc)	ppm	Miss	Score	Expect	Rank	Unique	Peptide
	1062	516.2738	1030.5331	1030.5560	-22.22	1	(32)	0.00067	1	U	K.KAELFPNGR.R 1063
	1066	516.7739	1031.5333	1031.5400	-6.46	1	73	4.6e-008	1	U	K.KAELFPNGR.R
	2674	742.8577	1483.7009	1483.7228	-14.79	0	154	3.9e-016	1	U	K.IAFLSMTDATTEGK.F
	2976	791.8947	1581.7748	1581.7787	-2.51	0	154	3.9e-016	1	U	R.QVQQLQDAFSQYK.K 2977
	3369	570.9656	1709.8749	1709.8737	0.72	1	154	3.9e-016	1	U	R.QVQQLQDAFSQYKK.A 3368
	3698	907.9679	1813.9212	1813.9170	2.36	0	(154)	3.9e-016	1	U	R.SAAENEALQQLVTAQNK.I 3699
	4543	1082.5037	2162.9928	2163.0015	-4.03	0	154	3.9e-016	1	U	K.SFEEAQQVCTQAGGQLASPR.S
	4815	1149.0210	2296.0274	2296.0320	-1.99	0	53	4.8e-006	1	U	R.TVTNACTLVMCSPMESGLPGR.D 4816
33.	F6QAU5 Mass: 11433 Score: 1102 Matches: 15(14) Sequences: 4(4) emPAI: 5.32
	Uncharacterized protein OS=Equus caballus OX=9796 PE=4 SV=1
	Query	Observed	Mr(expt)	Mr(calc)	ppm	Miss	Score	Expect	Rank	Unique	Peptide
	1059	516.2594	1030.5042	1030.5083	-3.96	0	(154)	3.9e-016	1		K.YAASSYLTR.T 1060 1061
	1418	572.7683	1143.5221	1143.5230	-0.84	0	41	7.8e-005	1		K.SYSSVSCQVK.H 1419
	3938	475.9984	1899.9644	1899.9763	-6.23	1	(154)	3.9e-016	1	U	K.VNDAVTNDRVQTTRPSK.Q 3942
	3940	634.3300	1899.9682	1899.9763	-4.23	1	(154)	3.9e-016	1	U	K.VNDAVTNDRVQTTRPSK.Q
	3947	476.2396	1900.9291	1900.9603	-16.37	1	(15)	0.029	1	U	K.VNDAVTNDRVQTTRPSK.Q
	3950	634.6554	1900.9444	1900.9603	-8.37	1	154	3.9e-016	1	U	K.VNDAVTNDRVQTTRPSK.Q 3949 3952 3953
	3954	634.6606	1900.9601	1900.9603	-0.08	1	(15)	0.031	1	U	K.VNDAVTNDRVQTTRPSK.Q
	4649	1111.0945	2220.1744	2220.1501	11.0	0	154	3.9e-016	1		K.ATVVCLISDFSPSGLEVIWK.V
34.	F7DXM5 Mass: 46844 Score: 1095 Matches: 13(10) Sequences: 9(7) emPAI: 0.72
	Uncharacterized protein OS=Equus caballus OX=9796 GN=LOC100065068 PE=3 SV=1
	Query	Observed	Mr(expt)	Mr(calc)	ppm	Miss	Score	Expect	Rank	Unique	Peptide
	492	374.2250	746.4355	746.4327	3.81	0	6	0.27	1		K.SPLFVGK.V 491
	730	444.7573	887.5000	887.4964	4.11	0	76	2.3e-008	1		K.AVLTIDEK.G 729
	996	504.7545	1007.4944	1007.4924	2.05	0	4	0.37	1		K.QINDYVEK.G
	3022	799.4204	1596.8263	1596.8300	-2.34	0	154	3.9e-016	1		K.IAPNLADFAFSLYR.H
	3509	879.9493	1757.8840	1757.9047	-11.77	0	154	3.9e-016	1	U	R.QADLSGITEEAPLTVSK.A
	4458	1061.1003	2120.1861	2120.1616	11.6	0	154	3.9e-016	1		K.LSISGTYDLTSILPELGITK.V
	4825	767.3661	2299.0766	2299.0757	0.42	1	154	3.9e-016	1	U	K.NLYHSEAFSINFGDTEEAKK.Q
	5102	620.2816	2477.0971	2477.1023	-2.09	0	15	0.029	1		K.WEKPFEPESTTEQDFHVDEK.T
	5405	666.5600	2662.2109	2662.2187	-2.94	1	(154)	3.9e-016	1		K.GKWEKPFEPESTTEQDFHVDEK.T 5407
	5408	888.4145	2662.2216	2662.2187	1.10	1	154	3.9e-016	1		K.GKWEKPFEPESTTEQDFHVDEK.T
35.	F7CT65 Mass: 21838 Score: 1051 Matches: 13(11) Sequences: 8(7) emPAI: 2.13
	Uncharacterized protein OS=Equus caballus OX=9796 GN=LOC100034197 PE=3 SV=1
	Query	Observed	Mr(expt)	Mr(calc)	ppm	Miss	Score	Expect	Rank	Unique	Peptide
	655	424.2539	846.4932	846.4964	-3.72	0	31	0.00083	1	U	R.VFVDVIR.A
	865	473.2669	944.5193	944.5178	1.51	0	24	0.0037	1		K.ENIIDLTK.I 863
	2129	671.8946	1341.7746	1341.7867	-9.03	1	15	0.029	1		R.GIVKENIIDLTK.I
	3033	801.8823	1601.7501	1601.7573	-4.48	0	154	3.9e-016	1		R.ALDNSSLYAEYQTK.V
	3210	549.2756	1644.8051	1644.8246	-11.90	1	(154)	3.9e-016	1		R.EPDVSPEIKEEFVK.I 3212 3213
	3211	823.4212	1644.8279	1644.8246	1.95	1	(154)	3.9e-016	1		R.EPDVSPEIKEEFVK.I 3214
	3272	836.8682	1671.7218	1671.7273	-3.30	0	154	3.9e-016	1	U	K.VNGECTEFPMVFDK.T
	3380	857.9537	1713.8929	1713.8614	18.4	0	32	0.00067	1		K.ISGEWYSIFLASDVK.E
	4146	986.5258	1971.0370	1970.9989	19.3	1	9	0.13	1		K.ISGEWYSIFLASDVKEK.I
	Proteins matching the same set of peptides:
	Q95182 Mass: 21682 Score: 1051 Matches: 13(11) Sequences: 8(7)
	Major allergen Equ c 1 OS=Equus caballus OX=9796 PE=1 SV=1
36.	F7B7X0 Mass: 66053 Score: 1040 Matches: 12(11) Sequences: 5(5) emPAI: 0.34
	Keratin 1 OS=Equus caballus OX=9796 GN=KRT1 PE=3 SV=1
	Query	Observed	Mr(expt)	Mr(calc)	ppm	Miss	Score	Expect	Rank	Unique	Peptide
	1072	517.2611	1032.5077	1032.5087	-1.03	0	41	7.6e-005	1	U	R.TLLEGEESR.M 1073 1074
	1170	533.2643	1064.5141	1064.5138	0.31	0	41	7.6e-005	1	U	R.AQYEDIAQK.S 1169
	1804	633.3189	1264.6233	1264.6299	-5.26	0	93	5.6e-010	1	U	R.TNAENEFVTIK.K
	2308	697.3651	1392.7157	1392.7249	-6.60	1	(154)	3.9e-016	1	U	R.TNAENEFVTIKK.D 2311
	2309	465.2459	1392.7159	1392.7249	-6.44	1	(154)	3.9e-016	1	U	R.TNAENEFVTIKK.D 2310
	2626	738.3963	1474.7780	1474.7780	0.04	0	(154)	3.9e-016	1		R.FLEQQNQVLQTK.W 2627
37.	F6W7V0 Mass: 62397 Score: 1038 Matches: 13(11) Sequences: 9(8) emPAI: 0.59
	Keratin 5 OS=Equus caballus OX=9796 GN=KRT5 PE=3 SV=1
	Query	Observed	Mr(expt)	Mr(calc)	ppm	Miss	Score	Expect	Rank	Unique	Peptide
	1209	361.5367	1081.5884	1081.5920	-3.35	1	81	8.3e-009	1		K.FASFIDKVR.F
	1210	541.8015	1081.5885	1081.5920	-3.28	1	(28)	0.0016	1		K.FASFIDKVR.F
	1242	547.2660	1092.5174	1092.5199	-2.30	0	84	3.6e-009	1	U	K.AQYEEIANR.S
	1581	597.7916	1193.5686	1193.5676	0.78	0	115	3.3e-012	1	U	K.YEELQQTAGR.H 1580
	1726	621.7838	1241.5531	1241.5564	-2.69	0	154	3.9e-016	1	U	R.TEAESWYQTK.Y
	1887	641.8166	1281.6186	1281.6275	-6.90	0	(3)	0.48	1	U	R.TTAENEFVMLK.K
	1946	649.8217	1297.6289	1297.6224	5.00	0	4	0.37	1	U	R.TTAENEFVMLK.K
	1975	651.8708	1301.7270	1301.7078	14.8	0	154	3.9e-016	1		R.SLDLDSIIAEVK.A
	2362	470.9138	1409.7196	1409.7224	-1.99	1	86	2.5e-009	1	U	R.TTAENEFVMLKK.D
	2676	743.3521	1484.6897	1484.6895	0.09	1	154	3.9e-016	1	U	R.SRTEAESWYQTK.Y 2675
	4309	683.0271	2046.0595	2046.0646	-2.52	1	154	3.9e-016	1		R.QNLEPLFEQYINNLRR.Q
38.	F6T0P6 Mass: 52829 Score: 1020 Matches: 10(9) Sequences: 7(7) emPAI: 0.53
	GC, vitamin D binding protein OS=Equus caballus OX=9796 GN=GC PE=4 SV=1
	Query	Observed	Mr(expt)	Mr(calc)	ppm	Miss	Score	Expect	Rank	Unique	Peptide
	1463	580.7712	1159.5278	1159.5332	-4.63	0	(154)	3.9e-016	1	U	R.LCSQYAAYGK.E 1465
	1892	642.8479	1283.6812	1283.7020	-16.14	0	33	0.0005	1	U	K.HLSLLTIMSNR.L
	4326	1027.9336	2053.8526	2053.8575	-2.36	0	102	6.8e-011	1	U	K.GQELCADYSENTFTEYK.K
	4352	1034.9235	2067.8324	2066.7979	501	0	(4)	0.39	1	U	K.NLDECCHSEDSTACLNAK.G
	4460	708.6170	2122.8292	2122.8354	-2.92	0	154	3.9e-016	1	U	K.NLDECCHSEDSTACLNAK.G
	4572	728.3249	2181.9528	2181.9524	0.19	1	154	3.9e-016	1	U	K.GQELCADYSENTFTEYKK.K
	4799	764.6490	2290.9253	2290.9293	-1.76	0	154	3.9e-016	1	U	K.SCESDSPFPVHPGTPECCTK.E 4798
	4967	1191.0647	2380.1148	2380.0572	24.2	0	154	3.9e-016	1	U	K.SYLSMVGSCCTSPSPTVCFLK.E
39.	F6VJR6 Mass: 54047 Score: 1009 Matches: 10(10) Sequences: 7(7) emPAI: 0.60
	Alpha-1B-glycoprotein OS=Equus caballus OX=9796 GN=A1BG PE=4 SV=1
	Query	Observed	Mr(expt)	Mr(calc)	ppm	Miss	Score	Expect	Rank	Unique	Peptide
	1194	538.2698	1074.5250	1074.5305	-5.17	0	154	3.9e-016	1	U	R.VGDTEASAVAR.A
	1305	557.8036	1113.5926	1113.5931	-0.42	0	130	9.7e-014	1	U	R.ALWSGAVTPGR.D
	2344	702.3524	1402.6903	1402.7027	-8.87	0	128	1.7e-013	1	U	K.CAAPLGGVDFQLR.R
	3868	626.6617	1876.9634	1876.9584	2.65	0	154	3.9e-016	1	U	R.HWADLVLSYVGPQHAGK.Y 3867
	4055	645.7052	1934.0938	1934.1061	-6.39	0	(15)	0.031	1	U	R.VQEASAQVLRPGVSLRPK.C
	4056	484.5323	1934.1000	1934.1061	-3.14	0	(154)	3.9e-016	1	U	R.VQEASAQVLRPGVSLRPK.C 4057
	4313	683.6611	2047.9614	2047.9786	-8.39	0	41	7.6e-005	1	U	R.VSFHLDALAPGDGGLYTCR.Y
	5442	900.0995	2697.2766	2697.2923	-5.79	0	154	3.9e-016	1	U	R.EGDDQFLEVAEAPEDVVVTFPVHR.A
40.	F6TIR2 Mass: 23133 Score: 989 Matches: 10(9) Sequences: 6(6) emPAI: 1.25
	Lipocalin 2 OS=Equus caballus OX=9796 GN=LCN2 PE=3 SV=1
	Query	Observed	Mr(expt)	Mr(calc)	ppm	Miss	Score	Expect	Rank	Unique	Peptide
	1218	543.8067	1085.5989	1085.6080	-8.47	1	92	7e-010	1	U	R.TKELTPELR.E 1219
	1695	616.3254	1230.6362	1230.6397	-2.85	0	(154)	3.9e-016	1	U	R.YFGVQSYIVR.V 1696
	1727	622.2633	1242.5121	1242.5200	-6.39	0	154	3.9e-016	1	U	R.DQNCDHWIR.T 1728
	3511	587.9578	1760.8515	1760.8734	-12.44	1	154	3.9e-016	1	U	R.VPLQPDFKDDQFQGK.W
	3664	903.4337	1804.8528	1804.8784	-14.23	0	15	0.031	1	U	R.VADTDYNQFAIVFFR.K
	4238	669.0189	2004.0349	2004.0429	-3.96	1	(154)	3.9e-016	1	U	R.TFIPSSQPGQFNLGDIKR.Y 4239
41.	F7DIB3 Mass: 44913 Score: 963 Matches: 8(8) Sequences: 4(4) emPAI: 0.43
	SEC14 like lipid binding 3 OS=Equus caballus OX=9796 GN=SEC14L3 PE=4 SV=1
	Query	Observed	Mr(expt)	Mr(calc)	ppm	Miss	Score	Expect	Rank	Unique	Peptide
	1856	639.3054	1276.5962	1276.6081	-9.38	0	(154)	3.9e-016	1	U	R.AGEMTEVVASQR.Y 1857
	2157	674.3327	1346.6509	1346.6579	-5.21	0	(88)	1.4e-009	1	U	K.TQYEHSVQISR.G
	2158	449.8917	1346.6532	1346.6579	-3.49	0	154	3.9e-016	1	U	K.TQYEHSVQISR.G
	4996	802.3925	2404.1557	2404.1911	-14.70	0	(154)	3.9e-016	1	U	K.LISPEELPAHFGGTLTDPDGNPK.C 4997 4998
	5291	856.7314	2567.1723	2567.1785	-2.39	0	41	7.6e-005	1	U	R.YNAHMVPEDGSLTCSEAGVYVLR.F
42.	F6YIA9 Mass: 48003 Score: 955 Matches: 12(11) Sequences: 10(9) emPAI: 0.82
	Uncharacterized protein OS=Equus caballus OX=9796 GN=KRT17 PE=3 SV=1
	Query	Observed	Mr(expt)	Mr(calc)	ppm	Miss	Score	Expect	Rank	Unique	Peptide
	571	404.2023	806.3900	806.3923	-2.74	0	126	2.4e-013	1		R.LAADDFR.T
	575	405.2217	808.4289	808.4330	-5.09	0	32	0.00067	1		R.LASYLDK.V
	1051	515.2989	1028.5832	1028.5866	-3.27	0	(32)	0.00067	1		R.VLDELTLAR.A 1052
	1167	532.8060	1063.5975	1063.6026	-4.76	1	63	5.1e-007	1		R.LASYLDKVR.A 1168
	1340	561.7924	1121.5703	1121.5717	-1.22	0	143	4.8e-015	1		R.LEQEIATYR.R
	1725	621.7829	1241.5512	1241.5458	4.36	0	9	0.13	1	U	K.NHEEEMNALR.G
	2141	673.3453	1344.6760	1344.6772	-0.92	0	154	3.9e-016	1	U	R.ALEEANTELEVK.I
	2216	681.3478	1360.6810	1360.6834	-1.77	0	154	3.9e-016	1		R.EVATNSELVQSGK.S
	2268	690.3622	1378.7099	1378.7204	-7.62	1	154	3.9e-016	1		K.TRLEQEIATYR.R
	4399	702.0187	2103.0342	2103.0444	-4.83	1	154	3.9e-016	1		K.TEELNREVATNSELVQSGK.S
43.	F7CAC5 Mass: 12224 Score: 936 Matches: 9(9) Sequences: 4(4) emPAI: 1.69
	Uncharacterized protein OS=Equus caballus OX=9796 PE=4 SV=1
	Query	Observed	Mr(expt)	Mr(calc)	ppm	Miss	Score	Expect	Rank	Unique	Peptide
	1059	516.2594	1030.5042	1030.5083	-3.96	0	(154)	3.9e-016	1		K.YAASSYLTR.T 1060 1061
	1418	572.7683	1143.5221	1143.5230	-0.84	0	41	7.8e-005	1		K.SYSSVSCQVK.H 1419
	2631	738.8644	1475.7143	1475.7216	-4.95	0	(154)	3.9e-016	1	U	K.VNDAVTTDGVQTTR.S 2632 2633
	4649	1111.0945	2220.1744	2220.1501	11.0	0	154	3.9e-016	1		K.ATVVCLISDFSPSGLEVIWK.V
44.	F6SHJ8 Mass: 61290 Score: 874 Matches: 9(9) Sequences: 5(5) emPAI: 0.44
	Uncharacterized protein OS=Equus caballus OX=9796 PE=3 SV=1
	Query	Observed	Mr(expt)	Mr(calc)	ppm	Miss	Score	Expect	Rank	Unique	Peptide
	1209	361.5367	1081.5884	1081.5920	-3.35	1	81	8.3e-009	1		K.FASFIDKVR.F
	1210	541.8015	1081.5885	1081.5920	-3.28	1	(28)	0.0016	1		K.FASFIDKVR.F
	1396	570.2739	1138.5333	1138.5328	0.41	0	31	0.00088	1	U	R.DYQELMNVK.L
	1623	604.8085	1207.6024	1207.6085	-5.02	0	154	3.9e-016	1	U	R.TAAENDFVTLK.K
	2110	446.2386	1335.6938	1335.7034	-7.17	1	(154)	3.9e-016	1	U	R.TAAENDFVTLKK.D 2109
	2111	668.8548	1335.6950	1335.7034	-6.27	1	154	3.9e-016	1	U	R.TAAENDFVTLKK.D
	2626	738.3963	1474.7780	1474.7780	0.04	0	(154)	3.9e-016	1		R.FLEQQNQVLQTK.W 2627
45.	F7ASU6 Mass: 52781 Score: 868 Matches: 11(9) Sequences: 7(5) emPAI: 0.44
	Selenium binding protein 1 OS=Equus caballus OX=9796 GN=SELENBP1 PE=4 SV=1
	Query	Observed	Mr(expt)	Mr(calc)	ppm	Miss	Score	Expect	Rank	Unique	Peptide
	1644	607.8152	1213.6159	1213.6204	-3.64	0	154	3.9e-016	1	U	K.SPQYSQVIHR.L
	1645	405.5463	1213.6170	1213.6204	-2.80	0	(15)	0.029	1	U	K.SPQYSQVIHR.L
	1757	624.3297	1246.6449	1246.6558	-8.74	0	70	9.8e-008	1	U	R.IYVVDVGTEPR.A
	1853	426.2136	1275.6189	1275.6261	-5.70	0	9	0.13	1	U	K.HLHVWDWQR.H
	2368	706.3782	1410.7418	1410.7355	4.49	0	154	3.9e-016	1	U	K.GGPVQVLEDQELK.S 2367
	4936	788.0544	2361.1413	2361.1536	-5.19	0	154	3.9e-016	1	U	R.FLHDPAASQGFVGCALSSTIQR.F 4935
	5075	820.0349	2457.0827	2457.0961	-5.42	0	(154)	3.9e-016	1	U	K.GTWERPGGSAPMGYDFWYQPR.H 5076
	5523	692.0710	2764.2548	2764.2983	-15.72	0	9	0.13	1	U	K.CGLGTPHTSHCLPTGEVMISTLGDPK.G
	Proteins matching the same set of peptides:
	F7CI32 Mass: 52491 Score: 868 Matches: 11(9) Sequences: 7(5)
	Selenium binding protein 1 OS=Equus caballus OX=9796 GN=SELENBP1 PE=4 SV=1
	F7DKR3 Mass: 53161 Score: 868 Matches: 11(9) Sequences: 7(5)
	Selenium binding protein 1 OS=Equus caballus OX=9796 GN=SELENBP1 PE=4 SV=1
46.	F7CKH3 Mass: 54817 Score: 759 Matches: 9(9) Sequences: 7(7) emPAI: 0.59
	Retinal dehydrogenase 1 OS=Equus caballus OX=9796 GN=ALDH1A1 PE=3 SV=1
	Query	Observed	Mr(expt)	Mr(calc)	ppm	Miss	Score	Expect	Rank	Unique	Peptide
	864	473.2663	944.5181	944.5291	-11.63	1	15	0.029	1		K.SLDDVIKR.A
	1563	595.3094	1188.6043	1188.6040	0.30	0	154	3.9e-016	1	U	R.QAFQLGSPWR.T
	2225	682.8342	1363.6539	1363.6839	-22.02	0	154	3.9e-016	1		R.LILATMESMNGGK.L
	2907	779.3840	1556.7535	1556.7835	-19.24	0	68	1.6e-007	1	U	R.ANNTTYGLSAGIFTK.D
	3209	549.2700	1644.7882	1644.7896	-0.84	0	121	7.3e-013	1		K.IFINNEWHDSVSGK.K
	3240	832.3727	1662.7309	1662.7407	-5.85	1	154	3.9e-016	1		K.LCEVEEGDKEDVNK.A
	3241	555.2545	1662.7415	1662.7407	0.53	1	(26)	0.0023	1		K.LCEVEEGDKEDVNK.A
	5394	887.4473	2659.3202	2659.3493	-10.97	1	154	3.9e-016	1	U	K.YVLGNPLTPGVSQGPQIDKEQYEK.I 5395
47.	F6ZXQ2 Mass: 43393 Score: 701 Matches: 10(10) Sequences: 8(8) emPAI: 0.80
	Uncharacterized protein OS=Equus caballus OX=9796 PE=3 SV=1
	Query	Observed	Mr(expt)	Mr(calc)	ppm	Miss	Score	Expect	Rank	Unique	Peptide
	571	404.2023	806.3900	806.3923	-2.74	0	126	2.4e-013	1		R.LAADDFR.T
	575	405.2217	808.4289	808.4330	-5.09	0	32	0.00067	1		R.LASYLDK.V
	1051	515.2989	1028.5832	1028.5866	-3.27	0	(32)	0.00067	1		R.VLDELTLAR.T 1052
	1167	532.8060	1063.5975	1063.6026	-4.76	1	63	5.1e-007	1		R.LASYLDKVR.A 1168
	1340	561.7924	1121.5703	1121.5717	-1.22	0	143	4.8e-015	1		R.LEQEIATYR.S
	2089	666.3386	1330.6626	1330.6728	-7.70	0	41	7.6e-005	1	U	K.AALEGTLAETEAR.F
	2268	690.3622	1378.7099	1378.7204	-7.62	1	154	3.9e-016	1		K.TRLEQEIATYR.S
	3026	799.8820	1597.7494	1597.7696	-12.68	0	154	3.9e-016	1	U	R.QSSATSSFGGLGSGSLR.F
48.	F7D7M7 Mass: 54010 Score: 683 Matches: 12(10) Sequences: 9(7) emPAI: 0.51
	Uncharacterized protein OS=Equus caballus OX=9796 PE=4 SV=1
	Query	Observed	Mr(expt)	Mr(calc)	ppm	Miss	Score	Expect	Rank	Unique	Peptide
	558	399.7538	797.4931	797.4912	2.38	0	4	0.37	1	U	R.HLLFLR.V
	960	497.2933	992.5720	992.5695	2.51	0	6	0.27	1	U	K.TLPFFLQK.M
	1207	541.3100	1080.6054	1080.6179	-11.52	0	46	2.7e-005	1	U	R.EQGLPLPSIK.G 1206 1208
	1403	570.8614	1139.7083	1139.7165	-7.17	0	57	1.9e-006	1	U	R.LEALVLELLK.R
	1942	432.9410	1295.8011	1295.8176	-12.75	1	154	3.9e-016	1	U	R.LEALVLELLKR.T
	2082	665.3926	1328.7707	1328.7551	11.7	0	154	3.9e-016	1	U	R.LDLSLVGDLLSGK.S
	2257	459.5867	1375.7382	1375.7361	1.55	0	88	1.5e-009	1	U	R.TFLPHHNELLR.E 2258
	2835	512.9598	1535.8577	1535.8572	0.30	0	23	0.0049	1	U	R.APRPDHLAPQPLPK.L
	4741	1133.6475	2265.2804	2265.2580	9.88	0	154	3.9e-016	1	U	K.ELLVDLQDSTAAALIQLLSPR.E
49.	H9GZS9 Mass: 38765 Score: 672 Matches: 11(9) Sequences: 7(6) emPAI: 0.78
	Uncharacterized protein OS=Equus caballus OX=9796 PE=4 SV=1
	Query	Observed	Mr(expt)	Mr(calc)	ppm	Miss	Score	Expect	Rank	Unique	Peptide
	761	453.2585	904.5025	904.5052	-2.95	0	3	0.49	1		K.VSVTCLVK.D
	1425	574.3308	1146.6471	1146.6431	3.48	1	32	0.00067	1		K.NKVSVTCLVK.D 1424
	2003	654.3552	1306.6958	1306.6993	-2.72	0	29	0.0012	1	U	K.VNNQALPAPVER.T
	2236	456.5693	1366.6860	1366.6993	-9.75	1	32	0.00067	1	U	R.IQHQDWLNGKK.F
	2872	516.9208	1547.7405	1547.7402	0.18	0	(154)	3.9e-016	1	U	K.TYICNVAHPASSTK.V 2870
	2873	774.8781	1547.7416	1547.7402	0.86	0	154	3.9e-016	1	U	K.TYICNVAHPASSTK.V
	3615	597.9937	1790.9591	1790.9567	1.37	0	154	3.9e-016	1	U	R.VPQVYVLAPHPDELSK.N 3614
	5348	873.3780	2617.1121	2617.1609	-18.62	0	154	3.9e-016	1	U	K.DFYPTDITVEWQSNEHPEPEGK.Y
50.	F6XS73 Mass: 41383 Score: 669 Matches: 8(8) Sequences: 6(6) emPAI: 0.59
	Chromosome 13 C16orf89 homolog OS=Equus caballus OX=9796 GN=C13H16orf89 PE=4 SV=1
	Query	Observed	Mr(expt)	Mr(calc)	ppm	Miss	Score	Expect	Rank	Unique	Peptide
	1599	601.2935	1200.5725	1200.5775	-4.15	0	15	0.029	1	U	R.AEAIGYAYSTR.D
	2066	664.3606	1326.7066	1326.7143	-5.79	0	154	3.9e-016	1	U	R.VLEGQLQGVQEK.W
	2218	681.3993	1360.7840	1360.7714	9.27	0	154	3.9e-016	1	U	K.ATIAGFILSALER.A
	2232	455.9033	1364.6881	1364.6949	-4.98	0	154	3.9e-016	1	U	R.AVEHQQHFLTR.V 2233
	2636	739.3701	1476.7256	1476.7402	-9.89	0	15	0.029	1	U	R.EFQPTIQPGFWK.L
	3757	919.3978	1836.7811	1836.7836	-1.36	0	154	3.9e-016	1	U	R.EGCFGTPDAEDEELLR.A 3758
51.	F6ZI51 Mass: 38574 Score: 660 Matches: 7(6) Sequences: 7(6) emPAI: 0.64
	Annexin OS=Equus caballus OX=9796 GN=ANXA2 PE=2 SV=1
	Query	Observed	Mr(expt)	Mr(calc)	ppm	Miss	Score	Expect	Rank	Unique	Peptide
	1079	518.2697	1034.5248	1034.5219	2.78	0	11	0.083	1	U	K.WISIMTER.S
	1299	556.2853	1110.5560	1110.5458	9.20	0	41	7.6e-005	1	U	R.QDIAFAYQR.R
	1669	611.8002	1221.5858	1221.5877	-1.57	0	154	3.9e-016	1	U	K.TPAQYDASELK.A
	1741	622.8136	1243.6126	1243.6156	-2.41	0	115	3.2e-012	1	U	R.TNQELQEINR.V
	3220	550.9893	1649.9461	1649.9716	-15.43	0	154	3.9e-016	1	U	K.SALSGHLETVILGLLK.T
	3706	606.9652	1817.8738	1817.8795	-3.16	0	154	3.9e-016	1	U	K.LSLEGDHSTPASAYGSVK.A
	4349	689.0007	2063.9802	2063.9760	2.05	1	107	2e-011	1	U	R.RAEDGSVIDYELIDQDAR.D
52.	F6Z129 Mass: 57479 Score: 644 Matches: 6(6) Sequences: 3(3) emPAI: 0.25
	Vanin 1 OS=Equus caballus OX=9796 GN=VNN1 PE=4 SV=1
	Query	Observed	Mr(expt)	Mr(calc)	ppm	Miss	Score	Expect	Rank	Unique	Peptide
	2168	676.3121	1350.6096	1350.6238	-10.51	0	154	3.9e-016	1	U	K.MTGSGIYAPDSPR.A
	3792	617.6060	1849.7960	1849.8112	-8.22	0	(154)	3.9e-016	1	U	R.TTDLHTCGDSVETASTR.F 3794
	3793	925.9053	1849.7961	1849.8112	-8.18	0	(154)	3.9e-016	1	U	R.TTDLHTCGDSVETASTR.F 3795
	4307	1023.0706	2044.1266	2044.1357	-4.48	0	34	0.00036	1	U	R.LFSLQPPSGPVLTVTLYGR.L
53.	F7AUX9 Mass: 25999 Score: 643 Matches: 8(8) Sequences: 3(3) emPAI: 0.62
	Pulmonary surfactant-associated protein A OS=Equus caballus OX=9796 GN=SFTPA1 PE=4 SV=1
	Query	Observed	Mr(expt)	Mr(calc)	ppm	Miss	Score	Expect	Rank	Unique	Peptide
	2499	723.3885	1444.7624	1444.7773	-10.28	0	154	3.9e-016	1	U	K.SLEENAAIASLVTK.H 2500 2501
	3253	834.4163	1666.8181	1666.8315	-8.05	0	154	3.9e-016	1	U	K.VFSTNGQVVDFDAIR.E
	3257	834.8990	1667.7835	1667.8155	-19.17	0	(144)	4.5e-015	1	U	K.VFSTNGQVVDFDAIR.E 3256 3258
	3275	837.3383	1672.6620	1672.6610	0.58	0	30	0.00098	1	U	K.CVEMYTDGQWNDR.S
	Proteins matching the same set of peptides:
	Q95L88 Mass: 26031 Score: 643 Matches: 8(8) Sequences: 3(3)
	Pulmonary surfactant-associated protein A OS=Equus caballus OX=9796 GN=SFTPA1 PE=2 SV=1
54.	F6PQ46 Mass: 121873 Score: 624 Matches: 7(6) Sequences: 7(6) emPAI: 0.17
	Ceruloplasmin OS=Equus caballus OX=9796 GN=CP PE=3 SV=1
	Query	Observed	Mr(expt)	Mr(calc)	ppm	Miss	Score	Expect	Rank	Unique	Peptide
	983	501.2345	1000.4545	1000.4614	-6.92	0	6	0.27	1	U	R.QFTDSTFR.V
	2178	677.3062	1352.5978	1352.6096	-8.73	1	41	7.6e-005	1	U	K.KDDEEFIESNK.M
	2609	734.8158	1467.6170	1467.6154	1.14	0	154	3.9e-016	1	U	K.SNEGTYYESQYK.H
	2877	775.3675	1548.7204	1548.7268	-4.09	0	154	3.9e-016	1	U	K.TESSTVTPTSPGETR.T
	2997	531.6028	1591.7867	1591.7916	-3.07	1	154	3.9e-016	1	U	K.EVGPTYKDPVCLSK.M
	3001	532.2540	1593.7401	1593.7271	8.17	1	32	0.00067	1	U	K.VDKENEDFLESNR.M
	5211	842.3877	2524.1413	2524.1653	-9.51	0	154	3.9e-016	1	U	K.AGLQAFFQVQDCNKPSSEDDIR.G
55.	F7C450 Mass: 38243 Score: 623 Matches: 10(8) Sequences: 5(5) emPAI: 0.64
	Alpha 2-HS glycoprotein OS=Equus caballus OX=9796 GN=AHSG PE=4 SV=1
	Query	Observed	Mr(expt)	Mr(calc)	ppm	Miss	Score	Expect	Rank	Unique	Peptide
	1723	621.3112	1240.6078	1240.6088	-0.84	0	32	0.00067	1	U	K.QNGQFSVSFVK.C 1721 1722 1724
	2634	738.8802	1475.7459	1475.7409	3.43	0	41	7.6e-005	1	U	K.VQVWAQPTGESFK.L
	3139	814.3765	1626.7384	1626.7420	-2.25	0	(154)	3.9e-016	1	U	R.QLTQHAVEGDCDVR.L
	3140	543.2537	1626.7392	1626.7420	-1.77	0	154	3.9e-016	1	U	R.QLTQHAVEGDCDVR.L 3138
	4210	666.6865	1997.0377	1997.0378	-0.00	0	23	0.0053	1	U	K.VAHPNTAAAAGPVVRPCPGR.I
	4987	599.7910	2395.1350	2395.1557	-8.65	0	154	3.9e-016	1	U	R.HAFAGVGSGESASGEAFHVEKPPK.V
56.	F7BF31 Mass: 46874 Score: 584 Matches: 10(7) Sequences: 7(5) emPAI: 0.50
	Uncharacterized protein OS=Equus caballus OX=9796 GN=SPI2 PE=3 SV=1
	Query	Observed	Mr(expt)	Mr(calc)	ppm	Miss	Score	Expect	Rank	Unique	Peptide
	492	374.2250	746.4355	746.4327	3.81	0	6	0.27	1		K.SPLFVGK.V 491
	730	444.7573	887.5000	887.4964	4.11	0	76	2.3e-008	1		K.AVLTIDEK.G 729
	996	504.7545	1007.4944	1007.4924	2.05	0	4	0.37	1		K.QINDYVEK.G
	1374	567.3070	1132.5995	1132.6240	-21.70	0	41	7.6e-005	1		K.GILATFLENR.H
	3022	799.4204	1596.8263	1596.8300	-2.34	0	154	3.9e-016	1		K.IAPNLADFAFSLYR.H
	4458	1061.1003	2120.1861	2120.1616	11.6	0	154	3.9e-016	1		K.LSISGTYDLTSILPELGITK.V
	5463	904.7336	2711.1789	2711.2027	-8.79	0	154	3.9e-016	1		K.GTWEKPFEPEYTTEQDFHVDEK.T
	5464	678.8025	2711.1809	2711.2027	-8.07	0	(41)	8.3e-005	1		K.GTWEKPFEPEYTTEQDFHVDEK.T
57.	H9GZN9 Mass: 49408 Score: 572 Matches: 8(7) Sequences: 7(6) emPAI: 0.47
	Immunoglobulin heavy constant mu OS=Equus caballus OX=9796 GN=IGHM PE=4 SV=1
	Query	Observed	Mr(expt)	Mr(calc)	ppm	Miss	Score	Expect	Rank	Unique	Peptide
	1243	547.2798	1092.5451	1092.5485	-3.08	0	32	0.00067	1	U	R.ESASVTCLVK.G
	1452	578.3247	1154.6349	1154.6407	-5.10	0	41	7.6e-005	1	U	K.QAISRPDAVAK.H
	1618	604.3073	1206.6001	1206.6067	-5.50	0	154	3.9e-016	1	U	R.LVCQATGFSPK.E 1619
	2224	681.8737	1361.7329	1361.7456	-9.32	0	27	0.002	1	U	K.HPPSVYVLPPTR.E
	3123	811.4792	1620.9439	1620.9279	9.87	0	154	3.9e-016	1	U	K.IFAIPPSFAGIFLTK.S
	3218	824.4387	1646.8628	1646.8457	10.4	0	154	3.9e-016	1	U	K.GFSPPDVFVQWLQK.G
	4384	697.3360	2088.9862	2088.9964	-4.89	0	4	0.37	1	U	R.DGKPVESGFTTEEVQPQNK.E
58.	F7DYC4 Mass: 40800 Score: 564 Matches: 9(8) Sequences: 7(6) emPAI: 0.60
	Uncharacterized protein OS=Equus caballus OX=9796 GN=SFTPB PE=4 SV=1
	Query	Observed	Mr(expt)	Mr(calc)	ppm	Miss	Score	Expect	Rank	Unique	Peptide
	1297	555.7714	1109.5282	1109.5175	9.59	0	32	0.00067	1	U	K.EAIFQDTMR.K
	1609	603.2920	1204.5694	1204.5659	2.94	0	50	1.1e-005	1	U	R.QACLGSWLDR.Q 1608
	1718	619.8052	1237.5958	1237.6125	-13.48	1	15	0.029	1	U	K.EAIFQDTMRK.F
	2156	673.9141	1345.8137	1345.7969	12.5	0	154	3.9e-016	1	U	R.YTVILLDALLGR.F
	2332	700.9058	1399.7971	1399.8010	-2.79	0	54	4e-006	1	U	R.FVPQLVCGLVLR.C
	3994	959.4648	1916.9151	1916.9150	0.09	0	(154)	3.9e-016	1	U	R.CSSEDGTGPALTALGSLPGK.W 3995
	4439	706.0323	2115.0750	2115.1211	-21.80	0	11	0.072	1	U	K.LERPEPGLEPEGLNPLLDK.L
59.	P38029 Mass: 46913 Score: 556 Matches: 10(6) Sequences: 7(4) emPAI: 0.40
	Alpha-1-antiproteinase 2 OS=Equus caballus OX=9796 PE=1 SV=2
	Query	Observed	Mr(expt)	Mr(calc)	ppm	Miss	Score	Expect	Rank	Unique	Peptide
	492	374.2250	746.4355	746.4327	3.81	0	6	0.27	1		K.SPLFVGK.V 491
	730	444.7573	887.5000	887.4964	4.11	0	76	2.3e-008	1		K.AVLTIDEK.G 729
	996	504.7545	1007.4944	1007.4924	2.05	0	4	0.37	1		K.QINDYVEK.G
	1585	599.3255	1196.6364	1196.6401	-3.04	0	9	0.11	1	U	K.LQHLEDTLTK.G
	3022	799.4204	1596.8263	1596.8300	-2.34	0	154	3.9e-016	1		K.IAPNLADFAFSLYR.H
	4458	1061.1003	2120.1861	2120.1616	11.6	0	154	3.9e-016	1		K.LSISGTYDLTSILPELGITK.V
	5463	904.7336	2711.1789	2711.2027	-8.79	0	154	3.9e-016	1		K.GTWEKPFEPEYTTEQDFHVDEK.T
	5464	678.8025	2711.1809	2711.2027	-8.07	0	(41)	8.3e-005	1		K.GTWEKPFEPEYTTEQDFHVDEK.T
60.	F6ZND8 Mass: 59832 Score: 553 Matches: 12(10) Sequences: 7(6) emPAI: 0.45
	Uncharacterized protein OS=Equus caballus OX=9796 GN=KRT6C PE=3 SV=1
	Query	Observed	Mr(expt)	Mr(calc)	ppm	Miss	Score	Expect	Rank	Unique	Peptide
	948	495.2528	988.4911	988.4825	8.73	0	4	0.38	4	U	K.QEISEINR.M 949
	1209	361.5367	1081.5884	1081.5920	-3.35	1	81	8.3e-009	1		K.FASFIDKVR.F
	1210	541.8015	1081.5885	1081.5920	-3.28	1	(28)	0.0016	1		K.FASFIDKVR.F
	1285	554.2747	1106.5349	1106.5356	-0.64	0	41	7.6e-005	1	U	K.AQYEEIAQR.S 1286
	1485	583.3037	1164.5929	1164.5775	13.2	0	41	7.6e-005	1	U	K.YEELQVTAGR.H 1483
	1606	602.3211	1202.6277	1202.6295	-1.56	0	66	2.6e-007	1	U	K.WTLLQEQGTK.T 1607
	1975	651.8708	1301.7270	1301.7078	14.8	0	154	3.9e-016	1		R.SLDLDSIIAEVK.A
	4309	683.0271	2046.0595	2046.0646	-2.52	1	154	3.9e-016	1		R.QNLEPLFEQYINNLRR.Q
	Proteins matching the same set of peptides:
	F7AGY4 Mass: 60145 Score: 553 Matches: 12(10) Sequences: 7(6)
	Uncharacterized protein OS=Equus caballus OX=9796 PE=3 SV=1
	F7D281 Mass: 59851 Score: 553 Matches: 12(10) Sequences: 7(6)
	Uncharacterized protein OS=Equus caballus OX=9796 GN=KRT6B PE=3 SV=1
61.	F6UP52 Mass: 222942 Score: 540 Matches: 9(9) Sequences: 8(8) emPAI: 0.12
	Myosin heavy chain 8 OS=Equus caballus OX=9796 GN=MYH8 PE=3 SV=1
	Query	Observed	Mr(expt)	Mr(calc)	ppm	Miss	Score	Expect	Rank	Unique	Peptide
	1443	577.2780	1152.5415	1152.5411	0.33	0	154	3.9e-016	1		R.LQTEAGEYSR.Q
	2276	461.5563	1381.6471	1381.6473	-0.17	0	15	0.029	1	U	K.LQHELEEAEER.A
	2693	744.8599	1487.7053	1487.6991	4.19	0	93	5e-010	1		R.IEELEEEIEAER.A 2692
	2771	504.2562	1509.7469	1509.7423	3.03	1	15	0.029	1	U	R.KLQHELEEAEER.A
	3367	570.6542	1708.9407	1708.9472	-3.79	0	74	3.7e-008	1		R.VQLLHTQNTSLINTK.K
	3577	594.6234	1780.8482	1780.8479	0.20	1	41	7.6e-005	1	U	K.QKYEETQAELEASQK.E
	3643	601.2756	1800.8051	1800.8126	-4.16	1	15	0.029	1		K.QREEQAEPDGTEVADK.A
	3767	919.9611	1837.9076	1837.9170	-5.11	0	154	3.9e-016	1		R.DLEEATLQHEATAAALR.K
62.	F6ZBG0 Mass: 28980 Score: 512 Matches: 6(6) Sequences: 5(5) emPAI: 0.72
	Carbonic anhydrase 1 OS=Equus caballus OX=9796 GN=CA1 PE=4 SV=1
	Query	Observed	Mr(expt)	Mr(calc)	ppm	Miss	Score	Expect	Rank	Unique	Peptide
	2188	678.8642	1355.7138	1355.7198	-4.36	0	32	0.00067	1	U	K.EIVNVGHSFQVK.F 2198
	3271	557.6144	1669.8215	1669.8212	0.16	0	154	3.9e-016	1	U	K.YSAELHLVHWNSSK.Y
	3496	878.9637	1755.9128	1755.9155	-1.54	0	148	1.5e-015	1	U	K.LYPIANGNNQSPIDIK.T
	4126	655.3297	1962.9671	1962.9687	-0.80	0	74	4.2e-008	1	U	K.HDTSLKPFSVSYDPATAK.E
	5512	688.0565	2748.1970	2748.2205	-8.56	0	154	3.9e-016	1	U	R.LSQFHFHWGSTDDYGSEHTVDGVK.Y
63.	F6S6J4 Mass: 22120 Score: 506 Matches: 8(7) Sequences: 6(6) emPAI: 1.33
	Uncharacterized protein OS=Equus caballus OX=9796 GN=PRDX1 PE=4 SV=1
	Query	Observed	Mr(expt)	Mr(calc)	ppm	Miss	Score	Expect	Rank	Unique	Peptide
	994	503.7786	1005.5426	1005.5284	14.1	0	15	0.03	1	U	K.IGYPAPNFK.A
	1478	582.7887	1163.5628	1163.5645	-1.43	0	41	7.6e-005	1	U	K.ATAVMPDGQFK.D
	1584	598.8145	1195.6144	1195.6237	-7.85	0	142	6.2e-015	1	U	R.LVQAFQFTDK.H
	1638	606.3417	1210.6689	1210.6670	1.59	0	147	2.1e-015	1		R.QITVNDLPVGR.S 1637
	3569	593.6567	1777.9482	1777.9509	-1.51	1	41	7.6e-005	1	U	K.QGGLGPMNIPLVSDPKR.T
	5000	602.2997	2405.1699	2405.1798	-4.13	0	154	3.9e-016	1	U	K.HGEVCPAGWKPGSDTIKPDVQK.S 5001
64.	F6QP34 Mass: 12894 Score: 483 Matches: 5(5) Sequences: 3(3) emPAI: 1.57
	WAP four-disulfide core domain 2 OS=Equus caballus OX=9796 GN=WFDC2 PE=4 SV=1
	Query	Observed	Mr(expt)	Mr(calc)	ppm	Miss	Score	Expect	Rank	Unique	Peptide
	867	473.7249	945.4352	945.4379	-2.87	0	41	7.6e-005	1	U	K.VSCVTPHF.-
	2765	755.8099	1509.6052	1509.6075	-1.55	0	(154)	3.9e-016	1	U	K.ECLSDGECADNLK.C 2766
	3963	636.2527	1905.7364	1905.7590	-11.86	0	154	3.9e-016	1	U	K.CCQAGCSSVCHLPNEK.Q
	3964	953.8890	1905.7635	1905.7590	2.36	0	(32)	0.00067	1	U	K.CCQAGCSSVCHLPNEK.Q
65.	F6SQD7 Mass: 11220 Score: 482 Matches: 4(4) Sequences: 2(2) emPAI: 0.71
	Uncharacterized protein OS=Equus caballus OX=9796 PE=4 SV=1
	Query	Observed	Mr(expt)	Mr(calc)	ppm	Miss	Score	Expect	Rank	Unique	Peptide
	1059	516.2594	1030.5042	1030.5083	-3.96	0	(154)	3.9e-016	1		K.YAASSYLTR.T 1060 1061
	4664	1113.0767	2224.1388	2224.1086	13.6	0	154	3.9e-016	1		K.ATVVCLISDFSPSDLTVSWK.V
66.	F6UL68 Mass: 15852 Score: 461 Matches: 4(4) Sequences: 2(2) emPAI: 0.79
	Transthyretin OS=Equus caballus OX=9796 GN=TTR PE=3 SV=1
	Query	Observed	Mr(expt)	Mr(calc)	ppm	Miss	Score	Expect	Rank	Unique	Peptide
	2431	712.8355	1423.6565	1423.6619	-3.85	0	(154)	3.9e-016	1	U	K.AADETWELFASGK.T 2432
	3244	555.2684	1662.7835	1662.7737	5.88	0	(37)	0.00018	1	U	K.TSEFGELHGLTTDEK.F
	3245	832.3995	1662.7844	1662.7737	6.44	0	154	3.9e-016	1	U	K.TSEFGELHGLTTDEK.F
67.	F7BFT1 Mass: 21917 Score: 459 Matches: 4(4) Sequences: 2(2) emPAI: 0.33
	Peroxiredoxin 2 OS=Equus caballus OX=9796 GN=PRDX2 PE=4 SV=1
	Query	Observed	Mr(expt)	Mr(calc)	ppm	Miss	Score	Expect	Rank	Unique	Peptide
	1638	606.3417	1210.6689	1210.6670	1.59	0	147	2.1e-015	1		R.QITVNDLPVGR.S 1637
	4317	684.6682	2050.9828	2050.9960	-6.41	1	(154)	3.9e-016	1	U	R.SLSHDYGVLKEDEGIAYR.G 4318
68.	F6SP11 Mass: 10973 Score: 457 Matches: 7(5) Sequences: 4(3) emPAI: 1.98
	Uncharacterized protein OS=Equus caballus OX=9796 PE=4 SV=1
	Query	Observed	Mr(expt)	Mr(calc)	ppm	Miss	Score	Expect	Rank	Unique	Peptide
	3301	562.9675	1685.8806	1685.8948	-8.44	0	32	0.00067	1	U	K.VNGAAISQGVQTTKPSK.Q 3302
	3303	843.9539	1685.8932	1685.8948	-0.98	0	(15)	0.029	1	U	K.VNGAAISQGVQTTKPSK.Q
	3340	850.4205	1698.8264	1698.8617	-20.78	0	(154)	3.9e-016	1	U	K.YAASSYLTLTPAQWK.S 3341
	4642	739.0339	2214.0798	2214.0957	-7.16	1	8	0.15	1	U	K.QSNGKYAASSYLTLTPAQWK.S
	4664	1113.0767	2224.1388	2224.1086	13.6	0	154	3.9e-016	1		K.ATVVCLISDFSPSDLTVSWK.V
69.	F6WGX6 Mass: 62957 Score: 453 Matches: 5(5) Sequences: 3(3) emPAI: 0.23
	Keratin 77 OS=Equus caballus OX=9796 GN=KRT77 PE=3 SV=1
	Query	Observed	Mr(expt)	Mr(calc)	ppm	Miss	Score	Expect	Rank	Unique	Peptide
	1209	361.5367	1081.5884	1081.5920	-3.35	1	81	8.3e-009	1		K.FASFIDKVR.F
	1210	541.8015	1081.5885	1081.5920	-3.28	1	(28)	0.0016	1		K.FASFIDKVR.F
	2625	738.3792	1474.7439	1474.7416	1.53	0	88	1.6e-009	1	U	K.WELLQQVDTSTR.T
	2626	738.3963	1474.7780	1474.7780	0.04	0	(154)	3.9e-016	1		R.FLEQQNQVLQTK.W 2627
70.	Q8HZM6 Mass: 38713 Score: 447 Matches: 4(4) Sequences: 4(4) emPAI: 0.39
	Annexin A1 OS=Equus caballus OX=9796 GN=ANXA1 PE=2 SV=3
	Query	Observed	Mr(expt)	Mr(calc)	ppm	Miss	Score	Expect	Rank	Unique	Peptide
	2333	701.3978	1400.7810	1400.7762	3.38	0	154	3.9e-016	1	U	K.GVDEATIIEILTK.R
	3719	913.9466	1825.8786	1825.8522	14.5	0	24	0.0042	1	U	K.QAWFIENEEQEYIK.A
	4323	685.2955	2052.8648	2052.8621	1.31	1	154	3.9e-016	1	U	K.GDRSEDFGVNDDLADSDAR.A
	4977	796.0491	2385.1256	2385.1237	0.78	0	154	3.9e-016	1	U	K.GGPGSAVSPYPSFNPSSDVDALHK.A
71.	F6S8W6 Mass: 59219 Score: 425 Matches: 6(6) Sequences: 4(4) emPAI: 0.31
	Keratin 75 OS=Equus caballus OX=9796 GN=KRT75 PE=3 SV=1
	Query	Observed	Mr(expt)	Mr(calc)	ppm	Miss	Score	Expect	Rank	Unique	Peptide
	1209	361.5367	1081.5884	1081.5920	-3.35	1	81	8.3e-009	1		K.FASFIDKVR.F
	1210	541.8015	1081.5885	1081.5920	-3.28	1	(28)	0.0016	1		K.FASFIDKVR.F
	1639	606.7826	1211.5506	1211.5458	3.96	0	154	3.9e-016	1	U	R.AEAESWYQTK.Y
	1975	651.8708	1301.7270	1301.7078	14.8	0	154	3.9e-016	1		R.SLDLDSIIAEVK.A
	2544	728.3481	1454.6817	1454.6790	1.90	1	41	7.6e-005	1	U	R.SRAEAESWYQTK.Y 2543
72.	F7CYR1 Mass: 52337 Score: 401 Matches: 8(7) Sequences: 8(7) emPAI: 0.53
	Serpin family C member 1 OS=Equus caballus OX=9796 GN=SERPINC1 PE=3 SV=1
	Query	Observed	Mr(expt)	Mr(calc)	ppm	Miss	Score	Expect	Rank	Unique	Peptide
	777	456.2646	910.5146	910.5236	-9.93	0	41	7.6e-005	1	U	K.LPGIVAEGR.S
	812	462.7363	923.4580	923.4600	-2.13	0	7	0.2	1	U	R.IEDSFSVK.E
	1361	563.8314	1125.6483	1125.6506	-2.04	1	152	5.9e-016	1	U	K.SKLPGIVAEGR.S
	1883	641.3087	1280.6029	1280.6037	-0.65	0	32	0.00067	1	U	R.SDLYVSDAFHK.A
	2122	447.5584	1339.6532	1339.6561	-2.15	0	40	9.5e-005	1	U	K.TSDQIHFFFAK.L
	2259	689.3216	1376.6286	1376.6581	-21.38	0	15	0.029	1	U	R.DIPVNPMCIYR.S
	3552	888.3890	1774.7635	1774.7324	17.5	0	154	3.9e-016	1	U	K.ADGQSCLASMMYQEGK.F
	3863	937.9423	1873.8700	1873.8653	2.48	1	44	3.9e-005	1	U	K.ATEDEGSEQKIPEATNR.R
73.	F6ZSQ2 Mass: 9694 Score: 386 Matches: 8(6) Sequences: 2(2) emPAI: 1.52
	Uteroglobin OS=Equus caballus OX=9796 GN=SCGB1A1 PE=4 SV=1
	Query	Observed	Mr(expt)	Mr(calc)	ppm	Miss	Score	Expect	Rank	Unique	Peptide
	831	466.7777	931.5408	931.5379	3.15	0	30	0.001	1	U	K.TLVDFLPK.N 830 833 834
	2251	688.3450	1374.6755	1374.6887	-9.59	1	(154)	3.9e-016	1	U	K.LMDKIVESPLCA.- 2252
	2303	696.3355	1390.6565	1390.6836	-19.52	1	(66)	2.4e-007	1	U	K.LMDKIVESPLCA.- 2304
74.	F6VSN2 Mass: 23428 Score: 368 Matches: 7(7) Sequences: 4(4) emPAI: 1.23
	Uncharacterized protein OS=Equus caballus OX=9796 GN=LOC100053249 PE=4 SV=1
	Query	Observed	Mr(expt)	Mr(calc)	ppm	Miss	Score	Expect	Rank	Unique	Peptide
	1381	568.7913	1135.5681	1135.5696	-1.30	0	15	0.029	1	U	K.ASCLYGQLPK.F
	4240	669.6658	2005.9757	2006.0221	-23.15	1	(15)	0.029	1	U	K.AFLASPEHVNLPINGNGKQ.-
	4241	669.6788	2006.0145	2006.0221	-3.80	1	41	7.6e-005	1	U	K.AFLASPEHVNLPINGNGKQ.-
	4243	670.0168	2007.0287	2007.0061	11.3	1	(30)	0.001	1	U	K.AFLASPEHVNLPINGNGKQ.-
	4555	1085.0173	2168.0201	2168.0677	-21.96	1	(36)	0.00027	1	U	K.YVTLIYTNYEAGKEDYVK.A
	4559	723.6877	2168.0412	2168.0677	-12.22	1	154	3.9e-016	1	U	K.YVTLIYTNYEAGKEDYVK.A
	5778	997.1736	2988.4989	2988.4725	8.84	1	154	3.9e-016	1	U	R.MLLADQGQSWKEEVVTVDTWMQGPLK.A
75.	F6XZQ1 Mass: 20863 Score: 361 Matches: 4(4) Sequences: 4(4) emPAI: 0.82
	Calcyphosine OS=Equus caballus OX=9796 GN=CAPS PE=4 SV=1
	Query	Observed	Mr(expt)	Mr(calc)	ppm	Miss	Score	Expect	Rank	Unique	Peptide
	942	493.7678	985.5211	985.5192	1.89	0	77	2e-008	1	U	R.ALDAAELQR.G
	1700	617.3105	1232.6065	1231.6045	814	0	15	0.031	1	U	R.SGDGVVTVDDLR.G
	2534	726.3540	1450.6935	1450.6940	-0.36	0	154	3.9e-016	1	U	R.DGSGTLDLEEFLR.A
	2955	787.8959	1573.7772	1573.7770	0.13	0	154	3.9e-016	1	U	K.LGLALDTAEAEGVCR.R
76.	F7D7M0 Mass: 63388 Score: 348 Matches: 5(5) Sequences: 5(5) emPAI: 0.29
	Galectin 3 binding protein OS=Equus caballus OX=9796 GN=LGALS3BP PE=4 SV=1
	Query	Observed	Mr(expt)	Mr(calc)	ppm	Miss	Score	Expect	Rank	Unique	Peptide
	2014	656.8200	1311.6255	1311.6306	-3.95	0	15	0.029	1	U	R.ASHGEVEDLVEK.V
	2494	721.8519	1441.6892	1441.6725	11.6	0	154	3.9e-016	1	U	K.SGYVDPTIGYENK.A
	2949	524.2878	1569.8415	1569.8667	-16.07	0	36	0.00028	1	U	K.ILQALEFHTVPFR.L
	3166	818.8950	1635.7755	1635.7814	-3.63	0	41	7.6e-005	1	U	R.FSCSSDEPPILGLSK.S
	3547	887.4038	1772.7931	1772.8152	-12.46	0	154	3.9e-016	1	U	K.LASAYGAEQLQSYCGR.L
77.	F7D2D9 Mass: 22193 Score: 314 Matches: 3(3) Sequences: 3(3) emPAI: 0.52
	Biliverdin reductase B OS=Equus caballus OX=9796 GN=BLVRB PE=4 SV=1
	Query	Observed	Mr(expt)	Mr(calc)	ppm	Miss	Score	Expect	Rank	Unique	Peptide
	1489	389.8756	1166.6049	1166.6044	0.45	0	154	3.9e-016	1	U	R.LQAVTDDHIR.M
	3495	586.3113	1755.9122	1755.9268	-8.32	0	32	0.00067	1	U	K.LPSEGPQPAHVVVGDVR.Q
	4533	720.0408	2157.1007	2157.1178	-7.96	1	154	3.9e-016	1	U	R.DASKLPSEGPQPAHVVVGDVR.Q
78.	F6R3X8 Mass: 23567 Score: 302 Matches: 3(3) Sequences: 3(3) emPAI: 0.49
	Brain abundant membrane attached signal protein 1 OS=Equus caballus OX=9796 GN=BASP1 PE=4 SV=1
	Query	Observed	Mr(expt)	Mr(calc)	ppm	Miss	Score	Expect	Rank	Unique	Peptide
	2289	694.3373	1386.6601	1385.6674	716	0	32	0.00067	1	U	K.ETPAATEAPSSTPK.A
	3718	913.9100	1825.8054	1825.8078	-1.33	0	154	3.9e-016	1	U	K.DGEQEQAAASGPAAGGDAPK.A
	4094	650.9631	1949.8676	1949.8814	-7.08	0	143	5.5e-015	1	U	K.SDGAPASDSKPSSTEAAASSK.E
79.	F6WXH5 Mass: 21639 Score: 300 Matches: 6(4) Sequences: 4(3) emPAI: 0.78
	Ferritin OS=Equus caballus OX=9796 GN=LOC111767398 PE=3 SV=1
	Query	Observed	Mr(expt)	Mr(calc)	ppm	Miss	Score	Expect	Rank	Unique	Peptide
	695	438.7600	875.5055	875.5116	-7.05	0	4	0.37	1	U	R.IFLQDIK.K
	1939	648.3470	1294.6795	1294.6881	-6.60	0	15	0.031	1	U	K.NVNESLLELHK.L
	2007	437.2337	1308.6793	1308.6898	-8.06	1	15	0.029	1	U	K.ELGDHVTNLRR.M
	2864	773.3494	1544.6843	1544.6967	-8.06	0	(154)	3.9e-016	1	U	R.QNYHQDSEAAINR.Q
	2865	515.9039	1544.6900	1544.6967	-4.39	0	154	3.9e-016	1	U	R.QNYHQDSEAAINR.Q
	2874	775.3438	1548.6731	1547.6488	662	0	(6)	0.27	1	U	R.QNYHQDSEAAINR.Q
	Proteins matching the same set of peptides:
	Q8MIP0 Mass: 21255 Score: 300 Matches: 6(4) Sequences: 4(3)
	Ferritin heavy chain OS=Equus caballus OX=9796 GN=FTH1 PE=2 SV=3
80.	F6ZI08 Mass: 19094 Score: 298 Matches: 3(3) Sequences: 3(3) emPAI: 0.63
	Tetraspanin OS=Equus caballus OX=9796 GN=TSPAN1 PE=3 SV=1
	Query	Observed	Mr(expt)	Mr(calc)	ppm	Miss	Score	Expect	Rank	Unique	Peptide
	1907	644.3450	1286.6755	1286.6554	15.6	0	154	3.9e-016	1	U	K.GCFSQLLHGIR.T
	4388	1048.3755	2094.7364	2094.7565	-9.57	0	154	3.9e-016	1	U	K.YCCSDDASNTNCTEAEAK.K
	4654	741.9562	2222.8469	2222.8514	-2.04	1	15	0.029	1	U	K.YCCSDDASNTNCTEAEAKK.K
81.	F6TJS5 Mass: 25436 Score: 295 Matches: 4(2) Sequences: 2(1) emPAI: 0.13
	Uncharacterized protein OS=Equus caballus OX=9796 PE=4 SV=1
	Query	Observed	Mr(expt)	Mr(calc)	ppm	Miss	Score	Expect	Rank	Unique	Peptide
	536	389.7274	777.4402	777.4385	2.16	0	13	0.053	1	U	R.VEVLYR.S 535
	1662	1221.4890	2440.9635	2440.9649	-0.58	0	(154)	3.9e-016	1	U	R.GSWGTVCDDDWDTNDANVVCR.Q 1663
82.	A2Q0Z1 Mass: 70854 Score: 247 Matches: 4(4) Sequences: 4(4) emPAI: 0.20
	Heat shock cognate 71 kDa protein OS=Equus caballus OX=9796 GN=HSPA8 PE=2 SV=1
	Query	Observed	Mr(expt)	Mr(calc)	ppm	Miss	Score	Expect	Rank	Unique	Peptide
	1592	600.3332	1198.6518	1198.6670	-12.64	0	36	0.00023	1	U	K.DAGTIAGLNVLR.I
	1687	614.8133	1227.6120	1227.6207	-7.09	0	64	4.4e-007	1	U	K.VEIIANDQGNR.T
	3314	564.5756	1690.7049	1690.7183	-7.96	0	154	3.9e-016	1	U	K.STAGDTHLGGEDFDNR.M
	3595	596.6612	1786.9618	1786.9828	-11.80	1	32	0.00067	1	U	R.IINEPTAAAIAYGLDKK.V
	Proteins matching the same set of peptides:
	F7AUW2 Mass: 70955 Score: 247 Matches: 4(4) Sequences: 4(4)
	Heat shock cognate 71 kDa protein OS=Equus caballus OX=9796 GN=HSPA8 PE=3 SV=1
83.	F6XLB1 Mass: 77311 Score: 242 Matches: 6(5) Sequences: 3(3) emPAI: 0.13
	Lactotransferrin OS=Equus caballus OX=9796 GN=LTF PE=3 SV=1
	Query	Observed	Mr(expt)	Mr(calc)	ppm	Miss	Score	Expect	Rank	Unique	Peptide
	1257	549.2543	1096.4940	1096.4978	-3.46	0	41	8.7e-005	1		R.YYGYTGAFR.C 1258 1259
	2046	661.8239	1321.6332	1321.6336	-0.36	0	52	6.1e-006	2	U	K.CLENGAGDVAFVK.D 2045
	2600	489.9126	1466.7161	1466.7300	-9.48	0	154	3.9e-016	1	U	R.KPVAEAESCHLAR.A
	Proteins matching the same set of peptides:
	O77811 Mass: 75943 Score: 242 Matches: 6(5) Sequences: 3(3)
	Lactotransferrin (Fragment) OS=Equus caballus OX=9796 GN=LTF PE=1 SV=1
84.	P00443 Mass: 16061 Score: 206 Matches: 3(3) Sequences: 3(3) emPAI: 0.77
	Superoxide dismutase [Cu-Zn] OS=Equus caballus OX=9796 GN=SOD1 PE=1 SV=2
	Query	Observed	Mr(expt)	Mr(calc)	ppm	Miss	Score	Expect	Rank	Unique	Peptide
	2801	764.3715	1526.7285	1525.7009	674	0	16	0.023	1	U	R.HVGDLGNVTADENGK.A
	4575	729.3347	2184.9823	2184.9957	-6.14	1	154	3.9e-016	1	U	R.HVGDLGNVTADENGKADVDMK.D
	5044	607.5573	2426.2001	2426.2343	-14.08	0	62	7e-007	1	U	K.GDGPVHGVIHFEQQQEGGPVVLK.G
85.	F6R810 Mass: 50072 Score: 202 Matches: 4(4) Sequences: 3(3) emPAI: 0.21
	Tubulin alpha chain OS=Equus caballus OX=9796 GN=LOC100052388 PE=3 SV=1
	Query	Observed	Mr(expt)	Mr(calc)	ppm	Miss	Score	Expect	Rank	Unique	Peptide
	3394	573.6311	1717.8715	1717.8747	-1.88	0	32	0.00067	1	U	R.NLDIERPTYTNLNR.L
	3714	912.9919	1823.9692	1823.9782	-4.91	0	32	0.00067	1	U	K.VGINYQPPTVVPGGDLAK.V 3715
	5036	604.5549	2414.1906	2414.1978	-2.98	1	154	3.9e-016	1	U	R.QLFHPEQLITGKEDAANNYAR.G
	Proteins matching the same set of peptides:
	F6SAV5 Mass: 50529 Score: 202 Matches: 4(4) Sequences: 3(3)
	Tubulin alpha chain OS=Equus caballus OX=9796 PE=3 SV=1
	F6YDT3 Mass: 50216 Score: 202 Matches: 4(4) Sequences: 3(3)
	Tubulin alpha chain OS=Equus caballus OX=9796 PE=3 SV=1
	F6YRE0 Mass: 49893 Score: 202 Matches: 4(4) Sequences: 3(3)
	Tubulin alpha chain OS=Equus caballus OX=9796 GN=TUBA1C PE=3 SV=1
	F6ZRY9 Mass: 50034 Score: 202 Matches: 4(4) Sequences: 3(3)
	Tubulin alpha chain OS=Equus caballus OX=9796 GN=TUBA8 PE=3 SV=1
	F6ZSB4 Mass: 50104 Score: 202 Matches: 4(4) Sequences: 3(3)
	Tubulin alpha chain OS=Equus caballus OX=9796 GN=TUBA1A PE=3 SV=1
	F7ANC9 Mass: 50428 Score: 202 Matches: 4(4) Sequences: 3(3)
	Tubulin alpha chain OS=Equus caballus OX=9796 GN=TUBA1B PE=3 SV=1
	F7CD56 Mass: 50363 Score: 202 Matches: 4(4) Sequences: 3(3)
	Tubulin alpha chain OS=Equus caballus OX=9796 GN=LOC100065732 PE=3 SV=1
	F7DNT0 Mass: 49922 Score: 202 Matches: 4(4) Sequences: 3(3)
	Tubulin alpha chain OS=Equus caballus OX=9796 GN=TUBA4A PE=3 SV=1
86.	F6USP9 Mass: 91655 Score: 202 Matches: 3(3) Sequences: 3(3) emPAI: 0.11
	Plasminogen OS=Equus caballus OX=9796 GN=PLG PE=3 SV=1
	Query	Observed	Mr(expt)	Mr(calc)	ppm	Miss	Score	Expect	Rank	Unique	Peptide
	2105	668.3380	1334.6614	1334.6613	0.06	0	154	3.9e-016	1	U	R.VSVTQSGLTCQR.W
	3809	618.6371	1852.8896	1852.9108	-11.42	0	30	0.001	1	U	R.HSIFTPEANPWANLEK.N
	5252	850.3763	2548.1072	2548.0709	14.2	0	44	4.1e-005	1	U	K.LFDYCDVPQCESSPFDCGKPK.V
87.	P05619 Mass: 42979 Score: 194 Matches: 3(3) Sequences: 3(3) emPAI: 0.25
	Leukocyte elastase inhibitor OS=Equus caballus OX=9796 GN=SERPINB1 PE=1 SV=3
	Query	Observed	Mr(expt)	Mr(calc)	ppm	Miss	Score	Expect	Rank	Unique	Peptide
	1157	531.2836	1060.5526	1060.5665	-13.16	0	35	0.00034	1	U	R.LGVQDLFNR.G
	4182	663.6990	1988.0751	1988.0731	1.02	0	32	0.00067	1	U	R.FQSLNADINKPGAPYILK.L
	4666	742.6815	2225.0227	2225.0423	-8.77	1	154	3.9e-016	1	U	K.MYGAELASVDFQQAPEDARK.E
88.	F7CU94 Mass: 16714 Score: 184 Matches: 3(3) Sequences: 3(3) emPAI: 0.74
	Lysozyme OS=Equus caballus OX=9796 GN=LYZ PE=2 SV=1
	Query	Observed	Mr(expt)	Mr(calc)	ppm	Miss	Score	Expect	Rank	Unique	Peptide
	907	485.7679	969.5213	969.5244	-3.11	0	41	7.6e-005	1	U	R.VVSDPQGIR.A
	1360	563.8209	1125.6273	1125.6255	1.63	1	15	0.031	1	U	K.RVVSDPQGIR.A
	4894	1167.0459	2332.0772	2332.0720	2.25	0	154	3.9e-016	1	U	R.ATNYNPGSQSTDYGIFQINSR.Y
89.	F7DZV9 Mass: 28093 Score: 182 Matches: 2(2) Sequences: 1(1) emPAI: 0.25
	Tyrosine 3-monooxygenase/tryptophan 5-monooxygenase activation protein beta OS=Equus caballus OX=9796 GN=YWHAB PE=3 SV=1
	Query	Observed	Mr(expt)	Mr(calc)	ppm	Miss	Score	Expect	Rank	Unique	Peptide
	3024	533.5836	1597.7290	1597.7332	-2.61	0	154	3.9e-016	1	U	K.AVTEQGHELSNEER.N
	3025	799.8738	1597.7330	1597.7332	-0.12	0	(41)	7.6e-005	1	U	K.AVTEQGHELSNEER.N
90.	F6XSF7 Mass: 192897 Score: 182 Matches: 3(2) Sequences: 3(2) emPAI: 0.03
	Uncharacterized protein OS=Equus caballus OX=9796 GN=LOC100059239 PE=4 SV=1
	Query	Observed	Mr(expt)	Mr(calc)	ppm	Miss	Score	Expect	Rank	Unique	Peptide
	1094	519.7794	1037.5442	1037.5506	-6.16	0	11	0.083	1	U	K.DHAVDLIQK.G
	2029	659.7977	1317.5809	1317.5772	2.84	0	40	9e-005	1	U	R.NPYGNNAPCSPK.V
	4286	679.3065	2034.8977	2034.8887	4.43	0	154	3.9e-016	1	U	R.NIAHDNLMAMAQESGDYR.Y
91.	F6QD28 Mass: 45593 Score: 180 Matches: 2(2) Sequences: 2(2) emPAI: 0.15
	Tubulin beta chain OS=Equus caballus OX=9796 PE=3 SV=1
	Query	Observed	Mr(expt)	Mr(calc)	ppm	Miss	Score	Expect	Rank	Unique	Peptide
	1688	615.2988	1228.5831	1228.5910	-6.45	0	154	3.9e-016	1	U	R.ISEQFTAMFR.R
	2037	660.3539	1318.6933	1318.6955	-1.65	0	39	0.00013	1	U	R.IMNTFSVVPSPK.V
	Proteins matching the same set of peptides:
	F7BHV8 Mass: 47520 Score: 180 Matches: 2(2) Sequences: 2(2)
	Tubulin beta chain OS=Equus caballus OX=9796 GN=TUBB4A PE=3 SV=1
	F7E0H3 Mass: 49639 Score: 180 Matches: 2(2) Sequences: 2(2)
	Tubulin beta chain OS=Equus caballus OX=9796 GN=TUBB PE=3 SV=1
92.	F7DHZ1 Mass: 85302 Score: 178 Matches: 5(4) Sequences: 4(4) emPAI: 0.16
	Gelsolin OS=Equus caballus OX=9796 GN=GSN PE=4 SV=1
	Query	Observed	Mr(expt)	Mr(calc)	ppm	Miss	Score	Expect	Rank	Unique	Peptide
	726	444.2488	886.4831	886.4872	-4.61	0	15	0.029	1	U	K.TGAQELLR.V
	3221	551.2610	1650.7611	1650.7584	1.65	1	(8)	0.15	1	U	K.DSQDEEKTEALTSAK.R
	3222	826.3881	1650.7616	1650.7584	1.92	1	154	3.9e-016	1	U	K.DSQDEEKTEALTSAK.R
	3823	929.4794	1856.9443	1856.9632	-10.20	0	32	0.00067	1	U	K.QTQVSVLPEGGETPLFR.Q
	6047	1129.2102	3384.6088	3384.6303	-6.35	1	15	0.029	1	U	R.VEGSNKVPVDPATYGQFYGGDSYIILYNYR.H
	Proteins matching the same set of peptides:
	F7E2D1 Mass: 86109 Score: 178 Matches: 5(4) Sequences: 4(4)
	Gelsolin OS=Equus caballus OX=9796 GN=GSN PE=4 SV=1
	Q28372 Mass: 80777 Score: 178 Matches: 5(4) Sequences: 4(4)
	Gelsolin OS=Equus caballus OX=9796 GN=GSN PE=1 SV=2
93.	F6RZ56 Mass: 25438 Score: 173 Matches: 4(2) Sequences: 4(2) emPAI: 0.28
	Uncharacterized protein OS=Equus caballus OX=9796 PE=3 SV=1
	Query	Observed	Mr(expt)	Mr(calc)	ppm	Miss	Score	Expect	Rank	Unique	Peptide
	688	436.2658	870.5171	870.5175	-0.45	0	32	0.00067	1	U	R.ISNLPTVK.K
	917	488.7933	975.5721	975.5753	-3.23	0	9	0.13	1	U	R.AILNYIAAK.Y
	1050	515.2935	1028.5725	1028.5767	-4.10	1	11	0.083	1	U	K.KFLQPGSPR.K
	1746	623.3051	1244.5957	1244.5898	4.72	0	154	3.9e-016	1	U	K.SHGQDYLVGNR.L
	Proteins matching the same set of peptides:
	F6WBP0 Mass: 25389 Score: 173 Matches: 4(2) Sequences: 4(2)
	Uncharacterized protein OS=Equus caballus OX=9796 PE=4 SV=1
94.	F6PNY0 Mass: 10311 Score: 173 Matches: 2(2) Sequences: 2(2) emPAI: 0.78
	Uncharacterized protein OS=Equus caballus OX=9796 PE=4 SV=1
	Query	Observed	Mr(expt)	Mr(calc)	ppm	Miss	Score	Expect	Rank	Unique	Peptide
	1502	585.7986	1169.5827	1169.5789	3.29	0	32	0.00067	1	U	K.DSERPSGIPGR.F
	3098	808.3959	1614.7773	1614.7849	-4.71	0	154	3.9e-016	1	U	R.FSSSSSGNTATLTISR.A
95.	F7APU2 Mass: 62612 Score: 173 Matches: 2(2) Sequences: 2(2) emPAI: 0.11
	Uncharacterized protein OS=Equus caballus OX=9796 PE=3 SV=1
	Query	Observed	Mr(expt)	Mr(calc)	ppm	Miss	Score	Expect	Rank	Unique	Peptide
	1240	546.7681	1091.5217	1091.5222	-0.50	0	32	0.00067	1	U	K.VFCQPWQK.C
	2497	722.8331	1443.6516	1443.6518	-0.14	0	154	3.9e-016	1	U	K.YGNTDSEGFVEVK.L
	Proteins matching the same set of peptides:
	F7AU56 Mass: 62712 Score: 173 Matches: 2(2) Sequences: 2(2)
	Uncharacterized protein OS=Equus caballus OX=9796 PE=3 SV=1
96.	F6UDZ6 Mass: 158554 Score: 168 Matches: 7(5) Sequences: 4(4) emPAI: 0.08
	Uncharacterized protein OS=Equus caballus OX=9796 PE=4 SV=1
	Query	Observed	Mr(expt)	Mr(calc)	ppm	Miss	Score	Expect	Rank	Unique	Peptide
	552	395.2394	788.4643	788.4644	-0.05	0	20	0.011	2	U	R.IVTLDTK.F 550 553 554
	1346	562.2988	1122.5831	1122.5921	-7.99	1	17	0.022	1	U	R.KTPDLTYASK.I
	2211	680.3630	1358.7114	1358.7306	-14.16	0	41	7.6e-005	1	U	K.QTLIWLSSQQR.S
	4259	1009.4320	2016.8495	2016.8595	-5.00	0	128	1.6e-013	1	U	K.QSSACPDEASAQQNPNWK.D
97.	F6YNH6 Mass: 37693 Score: 156 Matches: 2(2) Sequences: 2(2) emPAI: 0.18
	Cathepsin B OS=Equus caballus OX=9796 GN=CTSB PE=3 SV=1
	Query	Observed	Mr(expt)	Mr(calc)	ppm	Miss	Score	Expect	Rank	Unique	Peptide
	2963	789.3291	1576.6437	1576.6464	-1.73	0	154	3.9e-016	1	U	K.HYGCSSYSVSSSEK.E
	3273	558.2586	1671.7540	1671.7450	5.37	1	15	0.029	1	U	K.ICEPGYSPSYKEDK.H
98.	F7D854 Mass: 57262 Score: 154 Matches: 2(1) Sequences: 2(1) emPAI: 0.06
	Catalase OS=Equus caballus OX=9796 GN=CAT PE=3 SV=1
	Query	Observed	Mr(expt)	Mr(calc)	ppm	Miss	Score	Expect	Rank	Unique	Peptide
	2709	747.3525	1492.6905	1492.6906	-0.07	0	154	3.9e-016	1	U	R.FNSANEDNVTQVR.A
	3799	617.9617	1850.8634	1850.8759	-6.76	1	4	0.4	1	U	R.FSTVAGESGSADTVRDPR.G
99.	Q29482 Mass: 52121 Score: 154 Matches: 2(1) Sequences: 2(1) emPAI: 0.06
	Clusterin OS=Equus caballus OX=9796 GN=CLU PE=2 SV=1
	Query	Observed	Mr(expt)	Mr(calc)	ppm	Miss	Score	Expect	Rank	Unique	Peptide
	2248	687.3534	1372.6922	1372.6946	-1.73	1	154	3.9e-016	1	U	K.NLIEQTNEERK.S
	3705	606.9526	1817.8359	1817.8367	-0.42	0	4	0.44	1	U	R.QQTHVLDVMQDSFDR.A
100.	F6PVG3 Mass: 54755 Score: 154 Matches: 1(1) Sequences: 1(1) emPAI: 0.06
	EGF containing fibulin extracellular matrix protein 1 OS=Equus caballus OX=9796 GN=EFEMP1 PE=4 SV=1
	Query	Observed	Mr(expt)	Mr(calc)	ppm	Miss	Score	Expect	Rank	Unique	Peptide
	6065	864.0971	3452.3593	3452.3875	-8.15	0	154	3.9e-016	1	U	R.IQCATGYEQSEHNVCQDIDECTAGTHNCR.A
	Proteins matching the same set of peptides:
	F6T0M8 Mass: 54158 Score: 154 Matches: 1(1) Sequences: 1(1)
	EGF containing fibulin extracellular matrix protein 1 OS=Equus caballus OX=9796 GN=EFEMP1 PE=4 SV=1
101.	F6R7J2 Mass: 47576 Score: 154 Matches: 1(1) Sequences: 1(1) emPAI: 0.07
	Isocitrate dehydrogenase [NADP] OS=Equus caballus OX=9796 GN=IDH1 PE=3 SV=1
	Query	Observed	Mr(expt)	Mr(calc)	ppm	Miss	Score	Expect	Rank	Unique	Peptide
	2124	671.3345	1340.6545	1340.6684	-10.39	0	154	3.9e-016	1	U	K.TVEAEAAHGTVTR.H
102.	F6RGN2 Mass: 15140 Score: 154 Matches: 1(1) Sequences: 1(1) emPAI: 0.23
	Fatty acid binding protein 5 OS=Equus caballus OX=9796 GN=FABP5 PE=3 SV=1
	Query	Observed	Mr(expt)	Mr(calc)	ppm	Miss	Score	Expect	Rank	Unique	Peptide
	5905	781.1158	3120.4343	3120.4571	-7.32	1	154	3.9e-016	1	U	K.TQTVCNFTDGALVQHQEWDGKESTITR.K
103.	F6SPT8 Mass: 14008 Score: 154 Matches: 1(1) Sequences: 1(1) emPAI: 0.24
	Lipocalin 15 OS=Equus caballus OX=9796 GN=LCN15 PE=3 SV=1
	Query	Observed	Mr(expt)	Mr(calc)	ppm	Miss	Score	Expect	Rank	Unique	Peptide
	1272	551.8101	1101.6057	1101.6182	-11.39	0	154	3.9e-016	1	U	R.VPALGYLDVR.I
104.	F6SX98 Mass: 41145 Score: 154 Matches: 1(1) Sequences: 1(1) emPAI: 0.08
	Fructose-bisphosphate aldolase OS=Equus caballus OX=9796 GN=ALDOA PE=3 SV=1
	Query	Observed	Mr(expt)	Mr(calc)	ppm	Miss	Score	Expect	Rank	Unique	Peptide
	2096	666.8540	1331.6935	1331.6932	0.16	0	154	3.9e-016	1	U	K.GILAADESTGSIAK.R
105.	F6UUF5 Mass: 104179 Score: 154 Matches: 1(1) Sequences: 1(1) emPAI: 0.03
	Anion exchange protein OS=Equus caballus OX=9796 GN=SLC4A1 PE=3 SV=1
	Query	Observed	Mr(expt)	Mr(calc)	ppm	Miss	Score	Expect	Rank	Unique	Peptide
	2065	664.3472	1326.6799	1326.6892	-6.98	0	154	3.9e-016	1	U	K.ASTPGAEAQIQVR.E
106.	F6WA57 Mass: 70303 Score: 154 Matches: 1(1) Sequences: 1(1) emPAI: 0.05
	Lymphocyte cytosolic protein 1 OS=Equus caballus OX=9796 GN=LCP1 PE=4 SV=1
	Query	Observed	Mr(expt)	Mr(calc)	ppm	Miss	Score	Expect	Rank	Unique	Peptide
	3154	544.9265	1631.7577	1631.7638	-3.74	1	154	3.9e-016	1	U	K.TENLDDEEKLNNAK.Y
107.	F6WIP4 Mass: 19373 Score: 154 Matches: 1(1) Sequences: 1(1) emPAI: 0.17
	Lipocalin 1 OS=Equus caballus OX=9796 GN=LCN1 PE=3 SV=1
	Query	Observed	Mr(expt)	Mr(calc)	ppm	Miss	Score	Expect	Rank	Unique	Peptide
	4012	642.6323	1924.8751	1924.8915	-8.49	1	154	3.9e-016	1	U	R.DAENNQGALEDFKTFAR.D
108.	F6XEB4 Mass: 27728 Score: 154 Matches: 1(1) Sequences: 1(1) emPAI: 0.12
	Tyrosine 3-monooxygenase/tryptophan 5-monooxygenase activation protein zeta OS=Equus caballus OX=9796 GN=YWHAZ PE=3 SV=1
	Query	Observed	Mr(expt)	Mr(calc)	ppm	Miss	Score	Expect	Rank	Unique	Peptide
	1874	640.3239	1278.6332	1278.6456	-9.70	1	154	3.9e-016	1	U	R.YLAEVAAGDDKK.G
109.	F6YV40 Mass: 35801 Score: 154 Matches: 1(1) Sequences: 1(1) emPAI: 0.09
	Glyceraldehyde-3-phosphate dehydrogenase OS=Equus caballus OX=9796 GN=GAPDH PE=3 SV=1
	Query	Observed	Mr(expt)	Mr(calc)	ppm	Miss	Score	Expect	Rank	Unique	Peptide
	3517	882.3870	1762.7595	1762.7951	-20.18	0	154	3.9e-016	1	U	K.LISWYDNEFGYSNR.V
110.	F6ZWS7 Mass: 11486 Score: 154 Matches: 1(1) Sequences: 1(1) emPAI: 0.30
	Uncharacterized protein OS=Equus caballus OX=9796 GN=LOC100050760 PE=4 SV=1
	Query	Observed	Mr(expt)	Mr(calc)	ppm	Miss	Score	Expect	Rank	Unique	Peptide
	4275	676.3550	2026.0433	2026.0483	-2.47	0	154	3.9e-016	1	U	K.SLPHENKPLALSSYQTNK.A
	Proteins matching the same set of peptides:
	F7APS1 Mass: 11059 Score: 154 Matches: 1(1) Sequences: 1(1)
	Uncharacterized protein OS=Equus caballus OX=9796 GN=LOC100050835 PE=4 SV=1
111.	F7ATS5 Mass: 41194 Score: 154 Matches: 1(1) Sequences: 1(1) emPAI: 0.08
	Golgi membrane protein 1 OS=Equus caballus OX=9796 GN=GOLM1 PE=4 SV=1
	Query	Observed	Mr(expt)	Mr(calc)	ppm	Miss	Score	Expect	Rank	Unique	Peptide
	1664	611.3074	1220.6003	1220.6037	-2.76	1	154	3.9e-016	1	U	K.KNEFQGELEK.Q
112.	F7B3I5 Mass: 67804 Score: 154 Matches: 1(1) Sequences: 1(1) emPAI: 0.05
	Afamin OS=Equus caballus OX=9796 GN=AFM PE=4 SV=1
	Query	Observed	Mr(expt)	Mr(calc)	ppm	Miss	Score	Expect	Rank	Unique	Peptide
	3389	573.2271	1716.6595	1716.6654	-3.44	1	154	3.9e-016	1	U	K.TCCEEQDKANCFR.T
113.	F7BJD8 Mass: 34259 Score: 154 Matches: 1(1) Sequences: 1(1) emPAI: 0.10
	Cathepsin H OS=Equus caballus OX=9796 GN=CTSH PE=3 SV=1
	Query	Observed	Mr(expt)	Mr(calc)	ppm	Miss	Score	Expect	Rank	Unique	Peptide
	4282	678.6241	2032.8506	2032.8506	-0.02	1	154	3.9e-016	1	U	K.GIMGEDTYPYKGQDGDCK.F
114.	F7BND9 Mass: 11396 Score: 154 Matches: 1(1) Sequences: 1(1) emPAI: 0.30
	Protein S100 OS=Equus caballus OX=9796 GN=S100A11 PE=3 SV=1
	Query	Observed	Mr(expt)	Mr(calc)	ppm	Miss	Score	Expect	Rank	Unique	Peptide
	1458	579.7820	1157.5494	1157.5539	-3.90	0	154	3.9e-016	1	U	K.TEFLTFMNR.E
115.	F7CN05 Mass: 252397 Score: 154 Matches: 1(1) Sequences: 1(1) emPAI: 0.01
	Fibronectin OS=Equus caballus OX=9796 GN=FN1 PE=4 SV=1
	Query	Observed	Mr(expt)	Mr(calc)	ppm	Miss	Score	Expect	Rank	Unique	Peptide
	5034	604.5215	2414.0571	2414.0748	-7.33	0	154	3.9e-016	1	U	R.RPGAEPGHEGSTGHSYNQYSQR.Y
	Proteins matching the same set of peptides:
	F7CN11 Mass: 262233 Score: 154 Matches: 1(1) Sequences: 1(1)
	Fibronectin OS=Equus caballus OX=9796 GN=FN1 PE=4 SV=1
	F7CS60 Mass: 271922 Score: 154 Matches: 1(1) Sequences: 1(1)
	Fibronectin OS=Equus caballus OX=9796 GN=FN1 PE=4 SV=1
116.	F7CTJ3 Mass: 106381 Score: 154 Matches: 1(1) Sequences: 1(1) emPAI: 0.03
	Inter-alpha-trypsin inhibitor heavy chain 2 OS=Equus caballus OX=9796 GN=ITIH2 PE=4 SV=1
	Query	Observed	Mr(expt)	Mr(calc)	ppm	Miss	Score	Expect	Rank	Unique	Peptide
	2978	791.9156	1581.8166	1581.8474	-19.48	0	154	3.9e-016	1	U	K.IQPSGGTNINEALLR.A
	Proteins matching the same set of peptides:
	F7DAF6 Mass: 106653 Score: 154 Matches: 1(1) Sequences: 1(1)
	Inter-alpha-trypsin inhibitor heavy chain 2 OS=Equus caballus OX=9796 GN=ITIH2 PE=4 SV=1
	F7DL17 Mass: 106258 Score: 154 Matches: 1(1) Sequences: 1(1)
	Inter-alpha-trypsin inhibitor heavy chain 2 OS=Equus caballus OX=9796 GN=ITIH2 PE=4 SV=1
117.	F7DS45 Mass: 26753 Score: 154 Matches: 1(1) Sequences: 1(1) emPAI: 0.12
	Membrane spanning 4-domains A8 OS=Equus caballus OX=9796 GN=MS4A8 PE=4 SV=1
	Query	Observed	Mr(expt)	Mr(calc)	ppm	Miss	Score	Expect	Rank	Unique	Peptide
	3239	831.9360	1661.8574	1661.8737	-9.80	0	154	3.9e-016	1	U	R.SPPGLEPSVTVQPAQR.A
118.	P02791 Mass: 19965 Score: 149 Matches: 2(2) Sequences: 2(2) emPAI: 0.37
	Ferritin light chain OS=Equus caballus OX=9796 GN=FTL PE=1 SV=4
	Query	Observed	Mr(expt)	Mr(calc)	ppm	Miss	Score	Expect	Rank	Unique	Peptide
	1540	592.7938	1183.5731	1183.5768	-3.12	0	41	7.6e-005	1	U	K.MGDHLTNIQR.L
	2655	740.8547	1479.6949	1479.6954	-0.30	0	121	8.4e-013	1	U	R.QNYSTEVEAAVNR.L
119.	F7BNQ2 Mass: 67403 Score: 137 Matches: 2(1) Sequences: 2(1) emPAI: 0.05
	Complement component 4 binding protein alpha OS=Equus caballus OX=9796 GN=C4BPA PE=4 SV=1
	Query	Observed	Mr(expt)	Mr(calc)	ppm	Miss	Score	Expect	Rank	Unique	Peptide
	2351	469.2468	1404.7186	1404.7296	-7.85	0	137	2.2e-014	1	U	K.ALCPKPQIEHGR.L
	3074	537.5932	1609.7578	1609.7631	-3.28	1	6	0.27	1	U	R.CRNPGELHNGQISK.T
120.	F6TZS9 Mass: 26694 Score: 135 Matches: 1(1) Sequences: 1(1) emPAI: 0.13
	Triosephosphate isomerase OS=Equus caballus OX=9796 GN=TPI1 PE=3 SV=1
	Query	Observed	Mr(expt)	Mr(calc)	ppm	Miss	Score	Expect	Rank	Unique	Peptide
	1703	617.8016	1233.5887	1233.5949	-5.04	0	135	3e-014	1	U	K.SNVSDAVAQSTR.I
121.	F6ZXW9 Mass: 200898 Score: 127 Matches: 4(3) Sequences: 4(3) emPAI: 0.05
	Uncharacterized protein OS=Equus caballus OX=9796 PE=4 SV=1
	Query	Observed	Mr(expt)	Mr(calc)	ppm	Miss	Score	Expect	Rank	Unique	Peptide
	1635	606.3208	1210.6271	1210.6346	-6.25	0	41	7.6e-005	1	U	R.VAYDLVYNVR.V
	2325	699.8527	1397.6908	1397.6787	8.66	0	80	1.1e-008	1	U	R.SAIGSSGVYEVSSR.C
	4541	721.9610	2162.8612	2162.8779	-7.76	0	32	0.00067	1	U	K.DPCQDVNCRPQETCQEK.D
	5041	606.7546	2422.9895	2423.0093	-8.19	0	6	0.27	1	U	R.TDSFCPLECPAHSHYSVCTR.S
122.	F6VY00 Mass: 42407 Score: 126 Matches: 2(1) Sequences: 2(1) emPAI: 0.08
	Uncharacterized protein OS=Equus caballus OX=9796 PE=3 SV=1
	Query	Observed	Mr(expt)	Mr(calc)	ppm	Miss	Score	Expect	Rank	Unique	Peptide
	571	404.2023	806.3900	806.3923	-2.74	0	126	2.4e-013	1		R.LAADDFR.V
	1538	592.2942	1182.5738	1182.5993	-21.52	0	9	0.13	1	U	R.HLESELAQTR.A
	Proteins matching the same set of peptides:
	F7DNA3 Mass: 48180 Score: 126 Matches: 2(1) Sequences: 2(1)
	Uncharacterized protein OS=Equus caballus OX=9796 PE=3 SV=1
123.	F7CIW5 Mass: 16135 Score: 116 Matches: 5(4) Sequences: 3(3) emPAI: 0.77
	NPC intracellular cholesterol transporter 2 OS=Equus caballus OX=9796 GN=NPC2 PE=4 SV=1
	Query	Observed	Mr(expt)	Mr(calc)	ppm	Miss	Score	Expect	Rank	Unique	Peptide
	948	495.2528	988.4911	988.5012	-10.15	0	41	7.6e-005	1	U	K.SGISCPIQK.D 949
	3980	955.9422	1909.8698	1909.8775	-3.99	0	41	7.6e-005	1	U	K.EVNVNPCSTQPCQLHK.G
	3981	637.6346	1909.8819	1909.8775	2.33	0	(12)	0.07	1	U	K.EVNVNPCSTQPCQLHK.G
	4989	799.7830	2396.3270	2396.2927	14.3	0	41	7.6e-005	1	U	K.AVVHGIVLGVPVPFPIPEPDGCK.S
124.	F6TEI8 Mass: 14990 Score: 112 Matches: 1(1) Sequences: 1(1) emPAI: 0.23
	Profilin OS=Equus caballus OX=9796 PE=3 SV=1
	Query	Observed	Mr(expt)	Mr(calc)	ppm	Miss	Score	Expect	Rank	Unique	Peptide
	2542	727.8690	1453.7234	1453.7565	-22.83	0	112	6.1e-012	1	U	R.SSFFVNGLTLGGQK.C
	Proteins matching the same set of peptides:
	F6UJ33 Mass: 15034 Score: 112 Matches: 1(1) Sequences: 1(1)
	Profilin OS=Equus caballus OX=9796 GN=PFN1 PE=3 SV=1
125.	F6ZI35 Mass: 26756 Score: 102 Matches: 3(2) Sequences: 3(2) emPAI: 0.26
	Uncharacterized protein OS=Equus caballus OX=9796 PE=4 SV=1
	Query	Observed	Mr(expt)	Mr(calc)	ppm	Miss	Score	Expect	Rank	Unique	Peptide
	755	451.7467	901.4789	901.4869	-8.90	0	32	0.00067	1	U	K.TALDQINK.R
	1150	529.7972	1057.5798	1057.5880	-7.73	1	6	0.27	1	U	K.TALDQINKR.R
	1265	550.7366	1099.4586	1099.4570	1.41	0	84	4.2e-009	1	U	R.ENDDFASFR.V
126.	F6V1T9 Mass: 81784 Score: 93 Matches: 3(3) Sequences: 3(3) emPAI: 0.13
	Junction plakoglobin OS=Equus caballus OX=9796 GN=JUP PE=4 SV=1
	Query	Observed	Mr(expt)	Mr(calc)	ppm	Miss	Score	Expect	Rank	Unique	Peptide
	2126	671.3619	1340.7092	1340.7188	-7.12	0	41	7.9e-005	1	U	K.LLNDEDPVVVTK.A
	2176	676.8061	1351.5976	1351.6038	-4.56	0	63	4.9e-007	1	U	R.TMQNTSDLDTAR.C
	2237	684.8163	1367.6180	1367.6252	-5.23	0	15	0.029	1	U	R.HPEAEMAQNSVR.L
127.	F6SP74 Mass: 50634 Score: 74 Matches: 5(4) Sequences: 3(3) emPAI: 0.29
	Complement factor properdin OS=Equus caballus OX=9796 GN=CFP PE=4 SV=1
	Query	Observed	Mr(expt)	Mr(calc)	ppm	Miss	Score	Expect	Rank	Unique	Peptide
	3357	568.9326	1703.7760	1703.7719	2.40	1	41	7.6e-005	1	U	R.CIGQGGQCSEKVEPR.T
	4406	702.6277	2104.8612	2104.8804	-9.09	0	(15)	0.031	1	U	R.TCDHPVPQHGGPSCAGDASR.N
	4407	527.2242	2104.8679	2104.8804	-5.93	0	41	7.6e-005	1	U	R.TCDHPVPQHGGPSCAGDASR.N
	4729	566.2502	2260.9719	2260.9815	-4.24	1	15	0.029	1	U	R.RTCDHPVPQHGGPSCAGDASR.N 4728
128.	F7BFJ1 Mass: 70421 Score: 60 Matches: 2(2) Sequences: 2(2) emPAI: 0.10
	Prothrombin OS=Equus caballus OX=9796 GN=F2 PE=3 SV=1
	Query	Observed	Mr(expt)	Mr(calc)	ppm	Miss	Score	Expect	Rank	Unique	Peptide
	2617	737.3493	1472.6841	1472.6929	-6.03	0	32	0.00067	1	U	K.NLSPSLESCVPDR.G
	4181	497.7589	1987.0065	1987.0098	-1.65	0	42	7e-005	1	U	R.RPIAFSDHVHPVCLPDK.E
129.	F6U4X2 Score: 57 Matches: 5(5) Sequences: 2(2) emPAI: 0.10
	Alpha-fetoprotein OS=Equus caballus OX=9796 GN=AFP PE=4 SV=1
	Query	Observed	Mr(expt)	Mr(calc)	ppm	Miss	Score	Expect	Rank	Unique	Peptide
	815	464.2481	926.4816	926.4861	-4.89	0	41	7.6e-005	1	U	R.YLYEIAR.R 816 817 818
	899	483.2220	964.4295	964.4290	0.53	0	21	0.0083	1	U	R.FTYEYSR.R
	Proteins matching the same set of peptides:
	P49066 Score: 57 Matches: 5(5) Sequences: 2(2)
	Alpha-fetoprotein OS=Equus caballus OX=9796 GN=AFP PE=2 SV=1
130.	F6PJ64 Mass: 21042 Score: 57 Matches: 6(4) Sequences: 5(4) emPAI: 0.81
	Uncharacterized protein OS=Equus caballus OX=9796 PE=3 SV=1
	Query	Observed	Mr(expt)	Mr(calc)	ppm	Miss	Score	Expect	Rank	Unique	Peptide
	865	473.2669	944.5193	944.5178	1.51	0	24	0.0037	1		K.ENIIDLTK.I 863
	2129	671.8946	1341.7746	1341.7867	-9.03	1	15	0.029	1		R.GIVKENIIDLTK.I
	2904	778.8900	1555.7654	1555.7783	-8.32	0	11	0.083	1	U	K.DRPYQVLEFYAR.E
	4361	691.3510	2071.0312	2071.0473	-7.78	1	40	0.00011	1	U	R.EPDVSPELKNEFVEIAQK.R
	6147	1212.1735	3633.4986	3633.5842	-23.57	1	17	0.022	1	U	K.VNGECTEFSAVADKTEEDGVYSVNYDGYNVFR.I
131.	P30441 Mass: 13418 Score: 50 Matches: 2(2) Sequences: 1(1) emPAI: 0.25
	Beta-2-microglobulin OS=Equus caballus OX=9796 GN=B2M PE=1 SV=1
	Query	Observed	Mr(expt)	Mr(calc)	ppm	Miss	Score	Expect	Rank	Unique	Peptide
	2637	493.2919	1476.8539	1476.8664	-8.49	1	(32)	0.00067	1	U	R.VQHSTLKDPLIVK.W 2638
132.	F7ALV0 Mass: 10785 Score: 43 Matches: 2(2) Sequences: 2(2) emPAI: 0.74
	Thioredoxin OS=Equus caballus OX=9796 GN=TXN PE=4 SV=1
	Query	Observed	Mr(expt)	Mr(calc)	ppm	Miss	Score	Expect	Rank	Unique	Peptide
	2172	676.3298	1350.6451	1350.6415	2.66	0	15	0.031	1	U	-.SAFQEALNSAGEK.L
	2588	488.5922	1462.7547	1462.7642	-6.55	0	41	7.6e-005	1	U	K.MIKPFFHSLSEK.Y
	Proteins matching the same set of peptides:
	O97508 Mass: 11729 Score: 43 Matches: 2(2) Sequences: 2(2)
	Thioredoxin OS=Equus caballus OX=9796 GN=TXN PE=3 SV=3
133.	F6RLD7 Mass: 25429 Score: 41 Matches: 1(1) Sequences: 1(1) emPAI: 0.13
	Glutathione S-transferase omega 2 OS=Equus caballus OX=9796 GN=GSTO2 PE=3 SV=1
	Query	Observed	Mr(expt)	Mr(calc)	ppm	Miss	Score	Expect	Rank	Unique	Peptide
	1200	540.3078	1078.6010	1078.6135	-11.51	0	41	7.6e-005	1	U	R.HEVININLK.N
	Proteins matching the same set of peptides:
	F7BAA0 Mass: 27492 Score: 41 Matches: 1(1) Sequences: 1(1)
	Glutathione S-transferase omega 1 OS=Equus caballus OX=9796 GN=GSTO1 PE=3 SV=1
134.	F6VIZ0 Mass: 227159 Score: 41 Matches: 1(1) Sequences: 1(1) emPAI: 0.01
	Uncharacterized protein OS=Equus caballus OX=9796 PE=4 SV=1
	Query	Observed	Mr(expt)	Mr(calc)	ppm	Miss	Score	Expect	Rank	Unique	Peptide
	1514	587.3162	1172.6179	1172.6302	-10.50	0	41	7.6e-005	1	U	R.NNVVFQPLSR.E
135.	F6XA04 Mass: 26487 Score: 41 Matches: 1(1) Sequences: 1(1) emPAI: 0.13
	Tyrosine 3-monooxygenase/tryptophan 5-monooxygenase activation protein epsilon OS=Equus caballus OX=9796 GN=YWHAE PE=3 SV=1
	Query	Observed	Mr(expt)	Mr(calc)	ppm	Miss	Score	Expect	Rank	Unique	Peptide
	1717	619.3317	1236.6488	1236.6462	2.06	0	41	7.6e-005	1	U	K.HLIPAANTGESK.V
136.	F6YY66 Mass: 25578 Score: 41 Matches: 1(1) Sequences: 1(1) emPAI: 0.13
	Nucleoside diphosphate kinase OS=Equus caballus OX=9796 GN=NME1-NME2 PE=3 SV=1
	Query	Observed	Mr(expt)	Mr(calc)	ppm	Miss	Score	Expect	Rank	Unique	Peptide
	3586	595.9748	1784.9025	1784.9091	-3.66	0	41	7.6e-005	1	U	R.VMLGETNPADSKPGTIR.G
137.	F7CR03 Mass: 54695 Score: 41 Matches: 1(1) Sequences: 1(1) emPAI: 0.06
	Phospholipid transfer protein OS=Equus caballus OX=9796 GN=PLTP PE=4 SV=1
	Query	Observed	Mr(expt)	Mr(calc)	ppm	Miss	Score	Expect	Rank	Unique	Peptide
	2068	664.8438	1327.6729	1326.6415	777	0	41	7.6e-005	1	U	R.AVEPQLQEEER.M
138.	Q9GKX7 Mass: 84717 Score: 41 Matches: 1(1) Sequences: 1(1) emPAI: 0.04
	Heat shock protein HSP 90-alpha OS=Equus caballus OX=9796 GN=HSP90AA1 PE=2 SV=2
	Query	Observed	Mr(expt)	Mr(calc)	ppm	Miss	Score	Expect	Rank	Unique	Peptide
	3736	917.3975	1832.7805	1832.7741	3.51	0	41	7.6e-005	1	U	R.NPDDITNEEYGEFYK.S
139.	F6Y2Q4 Mass: 42690 Score: 41 Matches: 1(1) Sequences: 1(1) emPAI: 0.08
	Creatine kinase B OS=Equus caballus OX=9796 GN=CKB PE=3 SV=1
	Query	Observed	Mr(expt)	Mr(calc)	ppm	Miss	Score	Expect	Rank	Unique	Peptide
	4130	982.9692	1963.9238	1963.9236	0.10	0	41	8.2e-005	1	U	R.GTGGVDTAAVGGVFDVSNADR.L
140.	F6RHE9 Mass: 1009889 Score: 34 Matches: 4(2) Sequences: 4(2) emPAI: 0.01
	Uncharacterized protein OS=Equus caballus OX=9796 GN=SYNE1 PE=4 SV=1
	Query	Observed	Mr(expt)	Mr(calc)	ppm	Miss	Score	Expect	Rank	Unique	Peptide
	446	716.4175	715.4102	715.4116	-1.94	0	15	0.033	1	U	K.VEEIVK.D
	1664	611.3074	1220.6003	1220.5772	18.9	0	32	0.00065	5	U	K.TQASLQDSLEK.H
	2877	775.3675	1548.7204	1548.7453	-16.08	1	9	0.14	6	U	K.TEDLKSQLNELCR.F
	6251	1007.4453	4025.7519	4025.7771	-6.26	1	5	0.3	1	U	K.DFFRNLPHWIQQHTAMNDAGNFLIETCDEMVSR.D
	Proteins matching the same set of peptides:
	F7A103 Mass: 880688 Score: 34 Matches: 4(2) Sequences: 4(2)
	Uncharacterized protein OS=Equus caballus OX=9796 GN=SYNE1 PE=4 SV=1
141.	F6YS25 Mass: 29171 Score: 33 Matches: 2(2) Sequences: 2(2) emPAI: 0.24
	Carbonic anhydrase 2 OS=Equus caballus OX=9796 GN=CA2 PE=4 SV=1
	Query	Observed	Mr(expt)	Mr(calc)	ppm	Miss	Score	Expect	Rank	Unique	Peptide
	2080	665.3642	1328.7138	1328.7187	-3.67	0	32	0.00067	1	U	R.EPISVSSEQLLK.F
	2975	527.9467	1580.8183	1580.8099	5.30	0	14	0.038	1	U	K.YAAELHLVHWNTK.Y
142.	F6QXW2 Mass: 21325 Score: 32 Matches: 1(1) Sequences: 1(1) emPAI: 0.16
	Phosphatidylethanolamine binding protein 1 OS=Equus caballus OX=9796 GN=PEBP1 PE=4 SV=1
	Query	Observed	Mr(expt)	Mr(calc)	ppm	Miss	Score	Expect	Rank	Unique	Peptide
	4089	975.4682	1948.9219	1948.9378	-8.19	0	32	0.00067	1	U	K.GNDISSGTVLSDYVGSGPPK.G
143.	F6R6Z6 Mass: 32789 Score: 32 Matches: 1(1) Sequences: 1(1) emPAI: 0.10
	Epithelial cell adhesion molecule OS=Equus caballus OX=9796 GN=EPCAM PE=4 SV=1
	Query	Observed	Mr(expt)	Mr(calc)	ppm	Miss	Score	Expect	Rank	Unique	Peptide
	2503	482.9030	1445.6872	1445.6899	-1.85	1	32	0.00067	1	U	K.DVKDESLFHSNR.M
144.	F7AEK5 Mass: 36786 Score: 32 Matches: 1(1) Sequences: 1(1) emPAI: 0.09
	Alkaline phosphatase, liver/bone/kidney OS=Equus caballus OX=9796 GN=ALPL PE=3 SV=1
	Query	Observed	Mr(expt)	Mr(calc)	ppm	Miss	Score	Expect	Rank	Unique	Peptide
	2016	657.3642	1312.7138	1312.7139	-0.05	0	32	0.00067	1	U	K.DIAYQLVHNIK.D
145.	F6VG02 Mass: 3910135 Score: 31 Matches: 5(1) Sequences: 5(1) emPAI: 0.00
	Titin OS=Equus caballus OX=9796 GN=TTN PE=4 SV=1
	Query	Observed	Mr(expt)	Mr(calc)	ppm	Miss	Score	Expect	Rank	Unique	Peptide
	1210	541.8015	1081.5885	1080.5815	932	1	5	0.33	4	U	K.FSGTKEITAK.W
	1472	581.3143	1160.6141	1160.6223	-7.07	1	8	0.17	2	U	K.IEGDLRAMLK.K
	6225	984.4319	3933.6987	3933.6204	19.9	0	3	0.45	3	U	K.CLQDQNTYTLVIDNVNTEEHEGEYTCEALNDNGK.T
	6280	1402.9312	4205.7716	4205.8317	-14.29	1	31	0.00071	1	U	K.FKCLQDQNTYTLVIDNVNTEEHEGEYTCEALNDNGK.T
	6304	1459.6532	4375.9378	4376.0035	-15.02	1	5	0.35	9	U	K.NFHASIHILNVETSDIGEYHCKAQNEVGSDTCICTVQLK.E
146.	F7D9J2 Mass: 64728 Score: 29 Matches: 4(1) Sequences: 4(1) emPAI: 0.05
	Transketolase OS=Equus caballus OX=9796 GN=TKT PE=4 SV=1
	Query	Observed	Mr(expt)	Mr(calc)	ppm	Miss	Score	Expect	Rank	Unique	Peptide
	549	394.2349	786.4552	786.4599	-6.05	0	6	0.27	1	U	K.LILDSAR.A
	1593	600.8133	1199.6120	1199.6186	-5.49	1	6	0.27	1	U	K.NSTFSEIFKK.E
	2353	469.5930	1405.7571	1405.7565	0.43	1	11	0.083	1	U	R.KITSDLDGHPVPK.Q
	3990	957.9697	1913.9248	1913.9259	-0.56	0	29	0.0013	1	U	R.SIPTSTVFYPSDGVSTEK.A
147.	F6RA82 Mass: 165691 Score: 23 Matches: 1(1) Sequences: 1(1) emPAI: 0.02
	Pappalysin 1 OS=Equus caballus OX=9796 GN=PAPPA PE=4 SV=1
	Query	Observed	Mr(expt)	Mr(calc)	ppm	Miss	Score	Expect	Rank	Unique	Peptide
	6331	1233.4828	4929.9020	4929.9266	-4.97	0	23	0.0052	1	U	K.FCGDPGPGNDTCGFHSFFNTPFNNFMSYADDDCTDSFTPNQVAR.M
	Proteins matching the same set of peptides:
	F6ZJU0 Mass: 31292 Score: 23 Matches: 1(1) Sequences: 1(1)
	Pappalysin 1 OS=Equus caballus OX=9796 GN=PAPPA PE=4 SV=1
148.	A0A0B4J1C5 Mass: 14719 Score: 15 Matches: 1(1) Sequences: 1(1) emPAI: 0.23
	Uncharacterized protein OS=Equus caballus OX=9796 GN=UBA52 PE=4 SV=1
	Query	Observed	Mr(expt)	Mr(calc)	ppm	Miss	Score	Expect	Rank	Unique	Peptide
	3591	894.4659	1786.9173	1786.9200	-1.50	0	15	0.029	1	U	K.TITLEVEPSDTIENVK.A
	Proteins matching the same set of peptides:
	F6V625 Mass: 8659 Score: 15 Matches: 1(1) Sequences: 1(1)
	Uncharacterized protein OS=Equus caballus OX=9796 PE=4 SV=1
	F6YM88 Mass: 25746 Score: 15 Matches: 1(1) Sequences: 1(1)
	Ubiquitin B OS=Equus caballus OX=9796 GN=UBB PE=4 SV=1
	F7AUY9 Mass: 19539 Score: 15 Matches: 1(1) Sequences: 1(1)
	Ribosomal protein S27a OS=Equus caballus OX=9796 GN=RPS27A PE=4 SV=1
	Q8MKD1 Mass: 34321 Score: 15 Matches: 1(1) Sequences: 1(1)
	Polyubiquitin-B OS=Equus caballus OX=9796 GN=UBB PE=2 SV=3
149.	F7DS76 Mass: 13442 Score: 15 Matches: 1(1) Sequences: 1(1) emPAI: 0.25
	Uncharacterized protein OS=Equus caballus OX=9796 PE=4 SV=1
	Query	Observed	Mr(expt)	Mr(calc)	ppm	Miss	Score	Expect	Rank	Unique	Peptide
	1202	540.8043	1079.5940	1079.5975	-3.25	1	15	0.031	1	U	K.TLIYATNKR.A
150.	F6RC31 Mass: 53554 Score: 13 Matches: 1(1) Sequences: 1(1) emPAI: 0.06
	N-sulfoglucosamine sulfohydrolase OS=Equus caballus OX=9796 GN=SGSH PE=4 SV=1
	Query	Observed	Mr(expt)	Mr(calc)	ppm	Miss	Score	Expect	Rank	Unique	Peptide
	3399	574.9380	1721.7923	1721.8081	-9.17	1	13	0.049	1	U	K.SRDPHETQNLASDPR.Y
Mascot: http://www.matrixscience.com/

## Sheet: Sample 2 DTT treated 
Mascot Search Results
Search title : Uniprot_Horse_25ppm-05Da
MS data file : 56294995342143263.mgf
Database : Uniprot-Horse UP000002281-25-02-2019 (22705 sequences; 12757064 residues)
Timestamp : 5 Apr 2019 at 16:52:49 GMT
Enzyme : Trypsin
Variable modifications : Carbamidomethyl (C),Deamidated (NQ),Oxidation (M)
Mass values : Monoisotopic
Protein Mass : Unrestricted
Peptide Mass Tolerance : ± 25 ppm (# 13C = 1)
Fragment Mass Tolerance: ± 0.06 Da
Max Missed Cleavages : 1
Instrument type : ESI-QUAD-TOF
Number of queries : 6444
Protein hits :	F7DYB1	Alpha-amylase OS=Equus caballus OX=9796 GN=LOC100049851 PE=3 SV=1
	F7BAY6	Serum albumin OS=Equus caballus OX=9796 GN=ALB PE=4 SV=1
	F6W1N4	Uncharacterized protein OS=Equus caballus OX=9796 GN=PIGR PE=4 SV=1
	P27425	Serotransferrin OS=Equus caballus OX=9796 GN=TF PE=2 SV=1
	Q2TU62	Calcium-activated chloride channel regulator 1 OS=Equus caballus OX=9796 GN=CLCA1 PE=1 SV=1
	F6X1X3	Vitelline membrane outer layer 1 homolog OS=Equus caballus OX=9796 GN=VMO1 PE=4 SV=1
	H9GZU9	Uncharacterized protein OS=Equus caballus OX=9796 PE=4 SV=1
	F6SJK9	Uncharacterized protein OS=Equus caballus OX=9796 PE=3 SV=1
	F6ZXW9	Uncharacterized protein OS=Equus caballus OX=9796 PE=4 SV=1
	F7DJZ1	BPI fold containing family B member 1 OS=Equus caballus OX=9796 GN=BPIFB1 PE=4 SV=1
	H9GZT5	Uncharacterized protein OS=Equus caballus OX=9796 PE=4 SV=1
	F6ZEQ3	Keratin 16 OS=Equus caballus OX=9796 GN=KRT16 PE=3 SV=1
	F7ATL5	Keratin 14 OS=Equus caballus OX=9796 GN=KRT14 PE=3 SV=1
	H9GZQ9	Uncharacterized protein OS=Equus caballus OX=9796 PE=4 SV=1
	F7BLE3	Uncharacterized protein OS=Equus caballus OX=9796 PE=4 SV=1
	H9GZU8	Uncharacterized protein OS=Equus caballus OX=9796 PE=4 SV=1
	F7AGY4	Uncharacterized protein OS=Equus caballus OX=9796 PE=3 SV=1
	F6YIA9	Uncharacterized protein OS=Equus caballus OX=9796 GN=KRT17 PE=3 SV=1
	F7BTW7	Uncharacterized protein OS=Equus caballus OX=9796 GN=LOC100060539 PE=4 SV=1
	F6XWM5	Haptoglobin OS=Equus caballus OX=9796 PE=3 SV=1
	F7B7X0	Keratin 1 OS=Equus caballus OX=9796 GN=KRT1 PE=3 SV=1
	F7AUX9	Pulmonary surfactant-associated protein A OS=Equus caballus OX=9796 GN=SFTPA1 PE=4 SV=1
	F6SP11	Uncharacterized protein OS=Equus caballus OX=9796 PE=4 SV=1
	H9GZV1	Uncharacterized protein OS=Equus caballus OX=9796 PE=4 SV=1
	F6PJX6	Keratin 13 OS=Equus caballus OX=9796 GN=KRT13 PE=3 SV=1
	F7DJE3	Surfactant protein D OS=Equus caballus OX=9796 GN=SFTPD PE=4 SV=1
	F7CAC5	Uncharacterized protein OS=Equus caballus OX=9796 PE=4 SV=1
	F6W7V0	Keratin 5 OS=Equus caballus OX=9796 GN=KRT5 PE=3 SV=1
	F6V1T9	Junction plakoglobin OS=Equus caballus OX=9796 GN=JUP PE=4 SV=1
	A0A0B4J1C4	Joining chain of multimeric IgA and IgM OS=Equus caballus OX=9796 GN=JCHAIN PE=4 SV=1
	F6TIR2	Lipocalin 2 OS=Equus caballus OX=9796 GN=LCN2 PE=3 SV=1
	F6ZV64	Desmoplakin OS=Equus caballus OX=9796 GN=DSP PE=4 SV=1
	F6SHJ8	Uncharacterized protein OS=Equus caballus OX=9796 PE=3 SV=1
	F6TJS5	Uncharacterized protein OS=Equus caballus OX=9796 PE=4 SV=1
	F6S8W6	Keratin 75 OS=Equus caballus OX=9796 GN=KRT75 PE=3 SV=1
	F6V5H1	Immunoglobulin kappa constant OS=Equus caballus OX=9796 GN=IGKC PE=4 SV=1
	F6QAU5	Uncharacterized protein OS=Equus caballus OX=9796 PE=4 SV=1
	F6T3Y8	Actin, cytoplasmic 1 OS=Equus caballus OX=9796 GN=ACTB PE=3 SV=1
	F6ZXQ2	Uncharacterized protein OS=Equus caballus OX=9796 PE=3 SV=1
	F7CPJ5	Uncharacterized protein OS=Equus caballus OX=9796 GN=LOC100053601 PE=3 SV=1
	F6TY91	Uncharacterized protein OS=Equus caballus OX=9796 PE=4 SV=1
	F7D7M7	Uncharacterized protein OS=Equus caballus OX=9796 PE=4 SV=1
	F6VE52	Keratin 3 OS=Equus caballus OX=9796 GN=KRT3 PE=3 SV=1
	F6WGX6	Keratin 77 OS=Equus caballus OX=9796 GN=KRT77 PE=3 SV=1
	F6Z129	Vanin 1 OS=Equus caballus OX=9796 GN=VNN1 PE=4 SV=1
	H9GZN9	Immunoglobulin heavy constant mu OS=Equus caballus OX=9796 GN=IGHM PE=4 SV=1
	P05619	Leukocyte elastase inhibitor OS=Equus caballus OX=9796 GN=SERPINB1 PE=1 SV=3
	F7DXM5	Uncharacterized protein OS=Equus caballus OX=9796 GN=LOC100065068 PE=3 SV=1
	F7CG05	Ectonucleotide pyrophosphatase/phosphodiesterase 3 OS=Equus caballus OX=9796 GN=ENPP3 PE=4 SV=1
	F7C450	Alpha 2-HS glycoprotein OS=Equus caballus OX=9796 GN=AHSG PE=4 SV=1
	F6VSN2	Uncharacterized protein OS=Equus caballus OX=9796 GN=LOC100053249 PE=4 SV=1
	F6PNY0	Uncharacterized protein OS=Equus caballus OX=9796 PE=4 SV=1
	F6ZI08	Tetraspanin OS=Equus caballus OX=9796 GN=TSPAN1 PE=3 SV=1
	F7D7M0	Galectin 3 binding protein OS=Equus caballus OX=9796 GN=LGALS3BP PE=4 SV=1
	F6SK75	Desmoglein 1 OS=Equus caballus OX=9796 GN=DSG1 PE=4 SV=1
	Q8HZM6	Annexin A1 OS=Equus caballus OX=9796 GN=ANXA1 PE=2 SV=3
	F6ZI51	Annexin OS=Equus caballus OX=9796 GN=ANXA2 PE=2 SV=1
	F7CT65	Uncharacterized protein OS=Equus caballus OX=9796 GN=LOC100034197 PE=3 SV=1
	F6RDD3	Globin A1 OS=Equus caballus OX=9796 GN=HBB PE=3 SV=1
	F6PVG3	EGF containing fibulin extracellular matrix protein 1 OS=Equus caballus OX=9796 GN=EFEMP1 PE=4 SV=1
	P01958	Hemoglobin subunit alpha OS=Equus caballus OX=9796 GN=HBA PE=1 SV=2
	F7DIB3	SEC14 like lipid binding 3 OS=Equus caballus OX=9796 GN=SEC14L3 PE=4 SV=1
	Q28372	Gelsolin OS=Equus caballus OX=9796 GN=GSN PE=1 SV=2
	P38029	Alpha-1-antiproteinase 2 OS=Equus caballus OX=9796 PE=1 SV=2
	F6T3S4	Desmoplakin OS=Equus caballus OX=9796 GN=DSP PE=4 SV=1
	F6TZ61	Aldehyde dehydrogenase OS=Equus caballus OX=9796 GN=ALDH3B1 PE=3 SV=1
	F7CSL8	Uncharacterized protein OS=Equus caballus OX=9796 PE=3 SV=1
	F6WA57	Lymphocyte cytosolic protein 1 OS=Equus caballus OX=9796 GN=LCP1 PE=4 SV=1
	F6QP34	WAP four-disulfide core domain 2 OS=Equus caballus OX=9796 GN=WFDC2 PE=4 SV=1
	F6RMD0	Uncharacterized protein OS=Equus caballus OX=9796 GN=CFB PE=3 SV=1
	F6VJR6	Alpha-1B-glycoprotein OS=Equus caballus OX=9796 GN=A1BG PE=4 SV=1
	F7APS1	Uncharacterized protein OS=Equus caballus OX=9796 GN=LOC100050835 PE=4 SV=1
	A2Q0Z1	Heat shock cognate 71 kDa protein OS=Equus caballus OX=9796 GN=HSPA8 PE=2 SV=1
	F7D5X8	Keratin 4 OS=Equus caballus OX=9796 GN=KRT4 PE=3 SV=1
	F7CKH3	Retinal dehydrogenase 1 OS=Equus caballus OX=9796 GN=ALDH1A1 PE=3 SV=1
	F6PQ46	Ceruloplasmin OS=Equus caballus OX=9796 GN=CP PE=3 SV=1
	F6R1X9	Actin, alpha, cardiac muscle 1 OS=Equus caballus OX=9796 GN=ACTC1 PE=3 SV=1
	F7DYC4	Uncharacterized protein OS=Equus caballus OX=9796 GN=SFTPB PE=4 SV=1
	F6S6J4	Uncharacterized protein OS=Equus caballus OX=9796 GN=PRDX1 PE=4 SV=1
	F7BHV8	Tubulin beta chain OS=Equus caballus OX=9796 GN=TUBB4A PE=3 SV=1
	F6R3X8	Brain abundant membrane attached signal protein 1 OS=Equus caballus OX=9796 GN=BASP1 PE=4 SV=1
	F6YV40	Glyceraldehyde-3-phosphate dehydrogenase OS=Equus caballus OX=9796 GN=GAPDH PE=3 SV=1
	F7CU94	Lysozyme OS=Equus caballus OX=9796 GN=LYZ PE=2 SV=1
	F7CIW5	NPC intracellular cholesterol transporter 2 OS=Equus caballus OX=9796 GN=NPC2 PE=4 SV=1
	F7AEK5	Alkaline phosphatase, liver/bone/kidney OS=Equus caballus OX=9796 GN=ALPL PE=3 SV=1
	F6XS73	Chromosome 13 C16orf89 homolog OS=Equus caballus OX=9796 GN=C13H16orf89 PE=4 SV=1
	F7ASU6	Selenium binding protein 1 OS=Equus caballus OX=9796 GN=SELENBP1 PE=4 SV=1
	F7E0H3	Tubulin beta chain OS=Equus caballus OX=9796 GN=TUBB PE=3 SV=1
	F7CVH6	Plakophilin 1 OS=Equus caballus OX=9796 GN=PKP1 PE=4 SV=1
	F6UAQ8	Ferritin OS=Equus caballus OX=9796 PE=3 SV=1
	Q29482	Clusterin OS=Equus caballus OX=9796 GN=CLU PE=2 SV=1
	F6VZ15	Uncharacterized protein OS=Equus caballus OX=9796 PE=3 SV=1
	F6WQJ4	Tetraspanin OS=Equus caballus OX=9796 GN=CD9 PE=3 SV=1
	F7BC37	Serine protease 8 OS=Equus caballus OX=9796 GN=PRSS8 PE=3 SV=1
	F6ZSQ2	Uteroglobin OS=Equus caballus OX=9796 GN=SCGB1A1 PE=4 SV=1
	A2Q0Z0	Elongation factor 1-alpha 1 OS=Equus caballus OX=9796 GN=EEF1A1 PE=2 SV=1
	F6V7C1	Enolase 1 OS=Equus caballus OX=9796 GN=ENO1 PE=2 SV=1
	F6QXW2	Phosphatidylethanolamine binding protein 1 OS=Equus caballus OX=9796 GN=PEBP1 PE=4 SV=1
	F6S9R7	Annexin OS=Equus caballus OX=9796 GN=ANXA4 PE=3 SV=1
	F6YNH6	Cathepsin B OS=Equus caballus OX=9796 GN=CTSB PE=3 SV=1
	F7CYR1	Serpin family C member 1 OS=Equus caballus OX=9796 GN=SERPINC1 PE=3 SV=1
	F6W8W3	Keratin 24 OS=Equus caballus OX=9796 GN=KRT24 PE=3 SV=1
	F6TZS9	Triosephosphate isomerase OS=Equus caballus OX=9796 GN=TPI1 PE=3 SV=1
	F7DZV9	Tyrosine 3-monooxygenase/tryptophan 5-monooxygenase activation protein beta OS=Equus caballus OX=9796 GN=YWHAB PE=3 SV=1
	F7ALV0	Thioredoxin OS=Equus caballus OX=9796 GN=TXN PE=4 SV=1
	F7DBT2	Complement C1q C chain OS=Equus caballus OX=9796 GN=C1QC PE=4 SV=1
	F6XEB4	Tyrosine 3-monooxygenase/tryptophan 5-monooxygenase activation protein zeta OS=Equus caballus OX=9796 GN=YWHAZ PE=3 SV=1
	F6R810	Tubulin alpha chain OS=Equus caballus OX=9796 GN=LOC100052388 PE=3 SV=1
	F6UL68	Transthyretin OS=Equus caballus OX=9796 GN=TTR PE=3 SV=1
	F7BJD8	Cathepsin H OS=Equus caballus OX=9796 GN=CTSH PE=3 SV=1
	F6RGN2	Fatty acid binding protein 5 OS=Equus caballus OX=9796 GN=FABP5 PE=3 SV=1
	F7DB13	Uncharacterized protein OS=Equus caballus OX=9796 PE=4 SV=1
	F6T0P6	GC, vitamin D binding protein OS=Equus caballus OX=9796 GN=GC PE=4 SV=1
	F7BWJ9	Cysteine-rich secretory protein 3 OS=Equus caballus OX=9796 GN=CRISP3 PE=3 SV=1
	F6QXN5	Transgelin OS=Equus caballus OX=9796 GN=TAGLN2 PE=3 SV=1
	F6PQH3	Solute carrier family 44 member 4 OS=Equus caballus OX=9796 GN=SLC44A4 PE=3 SV=1
	F6W3M5	Pyruvate kinase OS=Equus caballus OX=9796 GN=PKM PE=3 SV=1
	F7BAA0	Glutathione S-transferase omega 1 OS=Equus caballus OX=9796 GN=GSTO1 PE=3 SV=1
	F7DEZ0	Solute carrier family 31 member 1 OS=Equus caballus OX=9796 GN=SLC31A1 PE=4 SV=1
	F6XRY7	Cystatin OS=Equus caballus OX=9796 GN=CST6 PE=3 SV=1
	F6TEI8	Profilin OS=Equus caballus OX=9796 PE=3 SV=1
	F7CR03	Phospholipid transfer protein OS=Equus caballus OX=9796 GN=PLTP PE=4 SV=1
	H9GZN7	Uncharacterized protein OS=Equus caballus OX=9796 PE=4 SV=1
	P02791	Ferritin light chain OS=Equus caballus OX=9796 GN=FTL PE=1 SV=4
	F6RZ56	Uncharacterized protein OS=Equus caballus OX=9796 PE=3 SV=1
	F6XZQ1	Calcyphosine OS=Equus caballus OX=9796 GN=CAPS PE=4 SV=1
	F6VK89	CD14 molecule OS=Equus caballus OX=9796 GN=CD14 PE=4 SV=1
	F6QME0	Uncharacterized protein OS=Equus caballus OX=9796 PE=4 SV=1
	F7BNQ2	Complement component 4 binding protein alpha OS=Equus caballus OX=9796 GN=C4BPA PE=4 SV=1
	F6VIZ0	Uncharacterized protein OS=Equus caballus OX=9796 PE=4 SV=1
	F6R2K0	Uncharacterized protein OS=Equus caballus OX=9796 PE=4 SV=1
	F7BPT4	Ezrin OS=Equus caballus OX=9796 GN=EZR PE=4 SV=1
	F7ALQ0	Transmembrane channel-like protein OS=Equus caballus OX=9796 GN=TMC5 PE=3 SV=1
	P00443	Superoxide dismutase [Cu-Zn] OS=Equus caballus OX=9796 GN=SOD1 PE=1 SV=2
	F6XBQ7	Uncharacterized protein OS=Equus caballus OX=9796 PE=4 SV=1
	F7CW51	Syndecan binding protein OS=Equus caballus OX=9796 GN=SDCBP PE=4 SV=1
	F6VUW2	Cathepsin S OS=Equus caballus OX=9796 GN=CTSS PE=3 SV=1
	F6U152	Dynein light chain OS=Equus caballus OX=9796 GN=DYNLL2 PE=3 SV=1
	F6SP74	Complement factor properdin OS=Equus caballus OX=9796 GN=CFP PE=4 SV=1
	F6X6A6	Peptidyl-prolyl cis-trans isomerase OS=Equus caballus OX=9796 GN=PPIA PE=3 SV=1
	F6PRI5	Carboxylic ester hydrolase OS=Equus caballus OX=9796 GN=LOC100051065 PE=3 SV=1
	F7CL15	Annexin OS=Equus caballus OX=9796 GN=ANXA5 PE=3 SV=1
	F6W039	Rho GDP dissociation inhibitor alpha OS=Equus caballus OX=9796 GN=ARHGDIA PE=4 SV=1
	F7DXG8	Cofilin 1 OS=Equus caballus OX=9796 GN=CFL1 PE=3 SV=1
	B1MV73	Beta catenin 1 OS=Equus caballus OX=9796 GN=CTNNB1 PE=2 SV=1
	F7CJ82	Arginase OS=Equus caballus OX=9796 GN=ARG1 PE=3 SV=1
	F7D7I2	Serpin family B member 12 OS=Equus caballus OX=9796 GN=SERPINB12 PE=3 SV=1
	F6PSQ2	Uncharacterized protein OS=Equus caballus OX=9796 PE=3 SV=1
	F7E486	5-azacytidine induced 2 OS=Equus caballus OX=9796 GN=AZI2 PE=4 SV=1
	A0A0B4J1C5	Uncharacterized protein OS=Equus caballus OX=9796 GN=UBA52 PE=4 SV=1
	F7D917	6-phosphogluconate dehydrogenase, decarboxylating OS=Equus caballus OX=9796 GN=PGD PE=3 SV=1
	Uniprot-Horse	Decoy	False discovery rate
Peptide matches above identity threshold	1293	7	0.0054
Select Summary Report (scores adjusted by Percolator)
			Help
	Significance threshold p<	Max. number of hits	Show Percolator scores
	Standard scoring MudPIT scoring	Ions score or expect cut-off	Show sub-sets
	Show pop-ups Suppress pop-ups		Require bold red
	Preferred taxonomy
All queries Unassigned Below homology threshold Below identity threshold
1.	F7DYB1 Mass: 57329 Score: 6340 Matches: 121(112) Sequences: 23(21) emPAI: 9.45
	Alpha-amylase OS=Equus caballus OX=9796 GN=LOC100049851 PE=3 SV=1
	Query	Observed	Mr(expt)	Mr(calc)	ppm	Miss	Score	Expect	Rank	Unique	Peptide
	441	737.3734	736.3661	736.3690	-3.91	0	6	0.26	1	U	R.NMVAFR.N
	753	449.7362	897.4579	897.4596	-1.86	0	11	0.083	1	U	R.YQPISYK.I 754
	922	492.2415	982.4685	982.4695	-0.94	0	15	0.03	1	U	K.HMWPGDIK.A 923 924 925 926
	1505	585.3472	1168.6799	1168.7067	-22.94	0	57	1.9e-006	1	U	R.VVGLLDLALEK.D
	1937	644.3457	1286.6769	1286.6772	-0.23	0	41	8.8e-005	1	U	R.TSIVHLFEWR.W 1935 1940
	1938	429.8997	1286.6771	1286.6772	-0.01	0	(33)	0.00053	1	U	R.TSIVHLFEWR.W 1934 1939
	1945	645.8145	1289.6145	1289.6074	5.48	0	28	0.0017	1	U	R.WVDIALECER.Y 1942 1944
	2501	714.3513	1426.6880	1426.6953	-5.16	0	79	1.3e-008	1	U	R.ALVFVDNHDNQR.G 2505 2506 2508
	2502	476.5699	1426.6880	1426.6953	-5.13	0	(66)	2.7e-007	1	U	R.ALVFVDNHDNQR.G 2503 2504 2507
	2518	476.8987	1427.6744	1427.6793	-3.46	0	(34)	0.00044	1	U	R.ALVFVDNHDNQR.G 2517
	2520	714.8455	1427.6765	1427.6793	-2.00	0	(47)	2.1e-005	1	U	R.ALVFVDNHDNQR.G 2516 2519 2521
	2855	769.8256	1537.6367	1537.6409	-2.71	0	40	0.00011	1	U	K.NWGEGWGFMPSDR.A
	2893	777.8251	1553.6356	1553.6358	-0.12	0	(6)	0.27	1	U	K.NWGEGWGFMPSDR.A 2895
	2898	778.3411	1554.6677	1554.6733	-3.58	1	70	9.8e-008	1	U	R.SGNEDEFRDMVTR.C 2899
	2900	519.2330	1554.6771	1554.6733	2.46	1	(67)	1.8e-007	1	U	R.SGNEDEFRDMVTR.C 2901 2902
	2930	786.3408	1570.6671	1570.6682	-0.70	1	(13)	0.046	1	U	R.SGNEDEFRDMVTR.C
	2931	524.5654	1570.6743	1570.6682	3.88	1	(24)	0.0036	1	U	R.SGNEDEFRDMVTR.C 2928
	3123	544.5922	1630.7547	1630.7852	-18.74	0	(48)	1.6e-005	1	U	R.GHGAGGASILTFWDSR.L 3125 3126
	3124	816.3856	1630.7567	1630.7852	-17.49	0	140	9.8e-015	1	U	R.GHGAGGASILTFWDSR.L 3127 3128 3129 3130
	3339	849.4075	1696.8004	1696.8218	-12.61	0	(69)	1.2e-007	1	U	K.MAVGFMLAHPYGFTR.I 3340
	3343	566.6133	1696.8180	1696.8218	-2.23	0	89	1.4e-009	1	U	K.MAVGFMLAHPYGFTR.I 3341 3342
	3370	568.3162	1701.9268	1701.9665	-23.31	1	55	3.5e-006	1	U	R.VVGLLDLALEKDYVR.S
	3395	571.9384	1712.7932	1712.8167	-13.71	0	(42)	6.4e-005	1	U	K.MAVGFMLAHPYGFTR.I 3396
	3647	907.9153	1813.8160	1813.7948	11.7	0	51	7.6e-006	1	U	R.DFPAVPYSGWDFNDGK.C
	3650	908.3961	1814.7776	1814.7788	-0.68	0	(36)	0.00026	1	U	R.DFPAVPYSGWDFNDGK.C
	4241	1038.0443	2074.0741	2074.0847	-5.14	0	(129)	1.3e-013	1	U	R.STIADYLNHLIDLGVAGFR.L
	4242	692.3667	2074.0783	2074.0847	-3.12	0	145	3.3e-015	1	U	R.STIADYLNHLIDLGVAGFR.L
	4248	692.6945	2075.0617	2075.0687	-3.38	0	(66)	2.4e-007	1	U	R.STIADYLNHLIDLGVAGFR.L
	4289	1052.4586	2102.9027	2102.8963	3.02	0	135	3.1e-014	1	U	K.CNSGSGEVENYNDIYQVR.D 4286 4287 4288
	4292	1052.9388	2103.8631	2103.8803	-8.18	0	(46)	2.8e-005	1	U	K.CNSGSGEVENYNDIYQVR.D 4293 4294
	4295	1052.9447	2103.8749	2103.8803	-2.61	0	(72)	6e-008	1	U	K.CNSGSGEVENYNDIYQVR.D
	4722	1151.9960	2301.9774	2301.9743	1.34	0	(131)	7.9e-014	1	U	K.EVTINPDTTCGNDWVCEHR.W 4725 4726
	4724	768.3334	2301.9783	2301.9743	1.73	0	136	2.7e-014	1	U	K.EVTINPDTTCGNDWVCEHR.W 4721 4723 4727
	4729	768.6571	2302.9495	2302.9583	-3.83	0	(81)	7.4e-009	1	U	K.EVTINPDTTCGNDWVCEHR.W 4730
	4947	1206.5575	2411.1004	2411.1254	-10.36	0	114	4e-012	1	U	R.NFQNGQDANDWIGPPNNNGVIK.E 4949
	4951	805.0404	2412.0994	2412.1094	-4.17	0	(12)	0.07	1	U	R.NFQNGQDANDWIGPPNNNGVIK.E
	4957	1207.0664	2412.1183	2412.1094	3.66	0	(79)	1.2e-008	1	U	R.NFQNGQDANDWIGPPNNNGVIK.E 4950 4952 4953
	4958	1207.0669	2412.1192	2412.1094	4.06	0	(61)	8.5e-007	1	U	R.NFQNGQDANDWIGPPNNNGVIK.E 4954 4955 4956 4959 4965
	4966	1207.5525	2413.0904	2413.0934	-1.25	0	(46)	2.4e-005	1	U	R.NFQNGQDANDWIGPPNNNGVIK.E 4961 4962 4963 4964 4968
	5226	1291.6078	2581.2010	2581.1735	10.7	0	154	4.3e-016	1	U	R.NVVDGQAFTNWWDNGSNQVAFGR.G
	5227	1292.1086	2582.2027	2582.1575	17.5	0	(57)	2.1e-006	1	U	R.NVVDGQAFTNWWDNGSNQVAFGR.G
	5678	979.1353	2934.3839	2934.4525	-23.38	0	99	1.2e-010	1	U	K.GFGGVQVSPPNENIVVNNPSRPWWER.Y 5680 5681
	5795	1040.4818	3118.4236	3118.4771	-17.15	0	69	1.3e-007	1	U	K.IYVSSDGSAYFSISNTAEDPFIAIHAESK.L
	5878	1078.2155	3231.6245	3231.5612	19.6	1	144	3.9e-015	1	U	K.IYVSSDGSAYFSISNTAEDPFIAIHAESKL.- 5875 5877
	5889	1085.7974	3254.3703	3254.3816	-3.48	0	163	5.2e-017	1	U	R.IYVDAVVNHMCGSGGGAGTSSTCGSYYNAGSR.D 5890 5891 5892
	5896	1086.1356	3255.3850	3255.3656	5.97	0	(82)	6.1e-009	1	U	R.IYVDAVVNHMCGSGGGAGTSSTCGSYYNAGSR.D 5894
	5897	1086.1418	3255.4037	3255.3656	11.7	0	(144)	4e-015	1	U	R.IYVDAVVNHMCGSGGGAGTSSTCGSYYNAGSR.D 5895 5898
	5914	1091.1394	3270.3964	3270.3765	6.08	0	(155)	3.2e-016	1	U	R.IYVDAVVNHMCGSGGGAGTSSTCGSYYNAGSR.D 5913
	6390	1498.0441	4491.1104	4491.0999	2.32	1	113	4.6e-012	1	U	R.GFIVFNNDDWALSSTLQTGLPGGTYCDVISGDKVDGNCTGIK.I
2.	F7BAY6 Mass: 68328 Score: 4067 Matches: 109(99) Sequences: 40(38) emPAI: 13.50
	Serum albumin OS=Equus caballus OX=9796 GN=ALB PE=4 SV=1
	Query	Observed	Mr(expt)	Mr(calc)	ppm	Miss	Score	Expect	Rank	Unique	Peptide
	530	395.2397	788.4648	788.4644	0.57	0	18	0.016	1	U	K.IVTDLTK.V 529
	791	457.2427	912.4709	912.4705	0.41	0	12	0.068	1	U	K.YLYEVAR.R 790 792
	883	479.7820	957.5495	957.5495	0.01	0	27	0.0019	1	U	K.QSALAELVK.H 882
	1018	339.8471	1016.5194	1016.5291	-9.54	0	(14)	0.041	1	U	K.SLHTLFGDK.L
	1020	509.2705	1016.5265	1016.5291	-2.59	0	30	0.00094	1	U	K.SLHTLFGDK.L 1019 1021
	1213	543.8304	1085.6462	1085.6444	1.65	1	13	0.05	1	U	K.KQSALAELVK.H
	1388	569.2488	1136.4830	1136.4808	1.94	0	44	4.3e-005	1	U	K.EACFAEEGPK.L
	1438	575.3102	1148.6059	1148.6077	-1.56	0	50	9.7e-006	1	U	K.LVNEVTEFAK.K 1437 1439
	1441	575.7940	1149.5735	1149.5917	-15.90	0	(23)	0.0047	1	U	K.LVNEVTEFAK.K
	1714	616.2614	1230.5082	1230.5088	-0.50	0	42	6.5e-005	1	U	K.CSSFQNFGER.A
	1799	627.3428	1252.6710	1252.6816	-8.45	0	65	3.2e-007	1	U	K.TVLGNFSAFVAK.C
	1892	639.3514	1276.6883	1276.7027	-11.24	1	20	0.009	1	U	K.LVNEVTEFAKK.C
	1895	426.5742	1276.7007	1276.7027	-1.52	1	(16)	0.027	1	U	K.LVNEVTEFAKK.C
	1970	650.3511	1298.6877	1298.6983	-8.13	0	52	6.3e-006	1	U	R.HPDYSVSLLLR.I 1969
	2470	708.7932	1415.5718	1415.5697	1.45	0	55	3.1e-006	1	U	R.ATYGELADCCEK.Q 2469
	2515	714.7764	1427.5382	1427.5333	3.39	0	43	5.1e-005	1	U	K.ADFTECCPADDK.A
	2542	718.8248	1435.6350	1435.6402	-3.61	0	59	1.3e-006	1	U	K.YICEHQDSISGK.L
	2543	479.5542	1435.6408	1435.6402	0.42	0	(43)	5.5e-005	1	U	K.YICEHQDSISGK.L 2541
	2603	485.9398	1454.7975	1454.7994	-1.26	1	41	8.9e-005	1	U	R.RHPDYSVSLLLR.I 2597 2599 2601 2602
	2604	728.4074	1454.8003	1454.7994	0.61	1	(17)	0.021	1	U	R.RHPDYSVSLLLR.I 2598 2600
	2635	734.4048	1466.7950	1466.8093	-9.73	0	66	2.4e-007	1	U	K.APQVSTPTLVEIGR.T 2636
	2653	491.9300	1472.7682	1472.7843	-10.92	1	16	0.026	1	U	K.LKACCDKPLLQK.S
	2989	798.4587	1594.9029	1594.9043	-0.83	1	101	8e-011	1	U	K.KAPQVSTPTLVEIGR.T 2988
	3041	804.4158	1606.8171	1606.8249	-4.86	0	76	2.2e-008	1	U	R.LPCSENHLALALNR.L 3042
	3043	536.6172	1606.8297	1606.8249	3.00	0	(65)	2.9e-007	1	U	R.LPCSENHLALALNR.L 3039 3040
	3048	536.9408	1607.8006	1607.8089	-5.21	0	(18)	0.016	1	U	R.LPCSENHLALALNR.L
	3053	805.3914	1608.7682	1608.7824	-8.86	0	49	1.3e-005	1	U	K.DVFLGTFLYEYSR.R
	3310	563.2617	1686.7631	1686.7784	-9.03	1	23	0.0055	1	U	K.QEPERNECFLTHK.D 3309 3312 3313
	3485	583.8854	1748.6343	1748.6553	-11.99	0	(36)	0.00024	1	U	K.ECCHGDLLECADDR.A
	3487	875.3433	1748.6721	1748.6553	9.63	0	93	5.6e-010	1	U	K.ECCHGDLLECADDR.A 3486
	3829	627.6370	1879.8892	1879.9138	-13.07	0	50	1e-005	1	U	R.RPCFSALELDEGYVPK.E 3831 3834
	3832	940.9604	1879.9063	1879.9138	-3.97	0	(41)	7.3e-005	1	U	R.RPCFSALELDEGYVPK.E 3830 3836
	3967	644.6832	1931.0277	1931.0299	-1.14	1	77	2.1e-008	1	U	K.SLHTLFGDKLCTVATLR.A 3966
	4031	979.3904	1956.7663	1956.7652	0.59	1	(61)	7.7e-007	1	U	K.CCGAEDKEACFAEEGPK.L
	4032	653.2630	1956.7672	1956.7652	1.02	1	115	3.3e-012	1	U	K.CCGAEDKEACFAEEGPK.L 4030
	4050	491.9891	1963.9272	1963.9210	3.14	1	73	4.7e-008	1	U	R.NECFLTHKDDHPNLPK.L 4049
	4178	1016.4663	2030.9181	2030.9320	-6.87	0	69	1.2e-007	1	U	K.EDDLPSDLPALAADFAEDK.E
	4212	685.9595	2054.8568	2054.8673	-5.13	1	120	9.1e-013	1	U	R.ATYGELADCCEKQEPER.N 4213
	4214	1028.4431	2054.8717	2054.8673	2.12	1	(54)	3.7e-006	1	U	R.ATYGELADCCEKQEPER.N
	4319	705.2946	2112.8618	2112.8775	-7.43	1	33	0.00046	1	U	K.VHKECCHGDLLECADDR.A
	4320	529.2242	2112.8676	2112.8775	-4.70	1	(16)	0.028	1	U	K.VHKECCHGDLLECADDR.A 4318
	4345	708.6525	2122.9356	2122.9517	-7.61	0	96	2.4e-010	1	U	K.AETFTFHADICTLPEDEK.Q 4347
	4348	1062.4777	2122.9408	2122.9517	-5.17	0	(72)	6.3e-008	1	U	K.AETFTFHADICTLPEDEK.Q 4346
	4383	714.0033	2138.9881	2139.0101	-10.33	0	111	7.9e-012	1	U	R.HPYFYGPELLFHAEEYK.A 4382
	4433	1084.4758	2166.9371	2166.9384	-0.60	1	(48)	1.6e-005	1	U	K.ADFTECCPADDKAGCLIPK.L
	4436	723.3245	2166.9517	2166.9384	6.15	1	69	1.3e-007	1	U	K.ADFTECCPADDKAGCLIPK.L 4434 4437 4438
	4590	562.7345	2246.9089	2246.9354	-11.82	1	(44)	4e-005	1	U	K.ECCHGDLLECADDRADLAK.Y 4592
	4591	749.9780	2246.9121	2246.9354	-10.40	1	91	7.5e-010	1	U	K.ECCHGDLLECADDRADLAK.Y 4593
	4698	574.7852	2295.1118	2295.1113	0.22	1	41	8.4e-005	1	U	R.RHPYFYGPELLFHAEEYK.A 4699
	4759	773.7302	2318.1687	2318.1801	-4.91	1	45	2.9e-005	1	U	K.LPESERLPCSENHLALALNR.L 4760
	4762	580.5515	2318.1770	2318.1801	-1.34	1	(41)	8.2e-005	1	U	K.LPESERLPCSENHLALALNR.L 4761
	4764	580.7955	2319.1528	2319.1641	-4.87	1	(38)	0.00017	1	U	K.LPESERLPCSENHLALALNR.L
	4991	1216.0558	2430.0970	2430.1162	-7.88	0	106	2.5e-011	1	U	K.NCDLFEEVGEYDFQNALIVR.Y
	5068	1239.6360	2477.2574	2477.2413	6.49	0	(42)	6.5e-005	1	U	K.GLVLVAFSQYLQQCPFEDHVK.L
	5069	826.7630	2477.2672	2477.2413	10.4	0	88	1.5e-009	1	U	K.GLVLVAFSQYLQQCPFEDHVK.L
	5091	831.7349	2492.1828	2492.1893	-2.64	1	41	7.2e-005	1	U	K.AETFTFHADICTLPEDEKQIK.K
	5107	835.4044	2503.1914	2503.2053	-5.54	1	134	3.9e-014	1	U	K.LKPEPDAQCAAFQEDPDKFLGK.Y 5110
	5108	626.8073	2503.2001	2503.2053	-2.06	1	(96)	2.6e-010	1	U	K.LKPEPDAQCAAFQEDPDKFLGK.Y 5109 5111 5112
	5204	854.7406	2561.2000	2561.1843	6.13	1	115	3.3e-012	1	U	K.EDDLPSDLPALAADFAEDKEICK.H
3.	F6W1N4 Mass: 82952 Score: 3004 Matches: 69(60) Sequences: 23(21) emPAI: 2.08
	Uncharacterized protein OS=Equus caballus OX=9796 GN=PIGR PE=4 SV=1
	Query	Observed	Mr(expt)	Mr(calc)	ppm	Miss	Score	Expect	Rank	Unique	Peptide
	536	397.2130	792.4115	792.4130	-1.94	0	13	0.046	1	U	R.GLSFDVR.L
	953	499.2870	996.5595	996.5604	-0.90	0	28	0.0015	1	U	K.IVEGQPNLK.V 954 955
	1190	539.8043	1077.5940	1077.6070	-12.10	0	28	0.0016	1	U	R.ETVAVYVAVK.E 1191 1192
	1515	587.2472	1172.4798	1172.4734	5.50	0	4	0.43	1	U	K.NQYEQYNGR.L
	1808	628.7867	1255.5588	1255.5656	-5.37	0	24	0.0043	1	U	K.CYYPPTSVNR.H 1807 1809 1810
	1931	643.3427	1284.6709	1284.6674	2.72	1	34	0.00044	1	U	R.KVESEVVQDPR.L 1930
	2082	661.3880	1320.7614	1320.7765	-11.41	1	(9)	0.14	1	U	K.IVEGQPNLKVPK.T
	2083	441.2642	1320.7707	1320.7765	-4.37	1	14	0.036	1	U	K.IVEGQPNLKVPK.T
	2226	678.7892	1355.5638	1355.5605	2.46	0	14	0.041	1	U	K.GDEGWYWCGVK.E 2224 2225
	2260	681.3329	1360.6513	1360.6470	3.19	0	72	6e-008	1	U	R.AAAAEDEIETSVR.K 2259
	2801	759.8881	1517.7616	1517.7548	4.45	0	55	3.3e-006	1	U	R.FDCALGPEVVNVAK.F 2802
	3064	807.8925	1613.7704	1613.7719	-0.97	0	(77)	1.9e-008	1	U	K.GQCTTLISSNGYVSK.D 3065
	3073	808.3877	1614.7608	1614.7559	3.04	0	99	1.4e-010	1	U	K.GQCTTLISSNGYVSK.D 3068 3069 3070 3071 3072 3074
	3083	808.9227	1615.8308	1615.8392	-5.23	0	84	4.4e-009	1	U	K.GVVGGSVAVLCPYNPK.E 3082 3084
	3085	809.3843	1616.7541	1615.7399	628	0	(34)	0.00043	1	U	K.GQCTTLISSNGYVSK.D
	3102	813.3972	1624.7799	1624.7845	-2.85	1	97	2.1e-010	1	U	R.VIDSAGYKGPNYEGR.A 3101
	3104	542.6030	1624.7873	1624.7845	1.69	1	(86)	2.5e-009	1	U	R.VIDSAGYKGPNYEGR.A 3103 3105
	3450	867.4543	1732.8940	1732.8818	7.05	0	64	4.1e-007	1	U	K.VSISCPFTSANLPNVK.S 3448 3449
	3643	604.9493	1811.8260	1811.8301	-2.27	1	5	0.34	1	U	K.QVTKGDEGWYWCGVK.E
	4051	983.0077	1964.0008	1963.9574	22.1	0	85	2.8e-009	1	U	K.TCNLVANTLGQWNQAFK.G
	4097	995.5043	1988.9940	1989.0280	-17.07	0	83	5.1e-009	1	U	R.ILSQNNNGVFSVDVTNLR.K
	4224	1031.0210	2060.0274	2060.0426	-7.37	0	21	0.0084	1	U	R.VVPGSGVLNGTQVYAEDLGGK.V
	4330	706.7121	2117.1145	2117.1229	-3.99	1	139	1.2e-014	1	U	R.ILSQNNNGVFSVDVTNLRK.E
	4332	707.0371	2118.0895	2118.1069	-8.22	1	(54)	3.7e-006	1	U	R.ILSQNNNGVFSVDVTNLRK.E 4331
	4445	1086.4978	2170.9811	2171.0351	-24.90	0	123	5e-013	1	U	K.TVNVELGETVQLTCHSPCK.F 4447 4448 4450
	4446	724.6700	2170.9881	2171.0351	-21.64	0	(114)	4.4e-012	1	U	K.TVNVELGETVQLTCHSPCK.F 4449
	4560	1114.5394	2227.0643	2227.0943	-13.48	0	104	4e-011	1	U	R.WEDIQNSGCPPLVQSTGLVK.N 4557 4558 4559 4561
	4565	1115.0237	2228.0328	2228.0783	-20.43	0	(17)	0.019	1	U	R.WEDIQNSGCPPLVQSTGLVK.N
	4573	745.6776	2234.0108	2234.0274	-7.40	1	(63)	5.1e-007	1	U	K.GQCTTLISSNGYVSKDYEGR.A
	4575	746.0102	2235.0088	2235.0114	-1.17	1	97	1.9e-010	1	U	K.GQCTTLISSNGYVSKDYEGR.A 4576
	4577	1118.5295	2235.0445	2235.0114	14.8	1	(54)	4.3e-006	1	U	K.GQCTTLISSNGYVSKDYEGR.A
	5302	660.0908	2636.3339	2636.3810	-17.84	0	52	6.8e-006	1	U	K.SNVDLHVLKPEPELVYADLGSSVR.F
	5303	1319.1781	2636.3417	2636.3810	-14.91	0	(10)	0.097	1	U	K.SNVDLHVLKPEPELVYADLGSSVR.F
	Proteins matching the same set of peptides:
	F6W2K5 Mass: 83421 Score: 3004 Matches: 69(60) Sequences: 23(21)
	Uncharacterized protein OS=Equus caballus OX=9796 GN=PIGR PE=4 SV=1
4.	P27425 Mass: 78044 Score: 2191 Matches: 68(61) Sequences: 35(34) emPAI: 4.64
	Serotransferrin OS=Equus caballus OX=9796 GN=TF PE=2 SV=1
	Query	Observed	Mr(expt)	Mr(calc)	ppm	Miss	Score	Expect	Rank	Unique	Peptide
	1005	507.2509	1012.4872	1012.4899	-2.66	0	6	0.26	1	U	R.TSYLECIK.A
	1023	510.7947	1019.5749	1019.5764	-1.46	0	21	0.0088	1	U	K.YLTAVANLR.Q
	1252	549.2562	1096.4979	1096.4978	0.10	0	22	0.0066	1		R.YYGYTGAFR.C 1248 1250 1251
	1266	551.2771	1100.5396	1100.5325	6.52	0	24	0.0042	1	U	K.FCLFQSATK.D 1265
	1771	415.8802	1244.6186	1244.6336	-12.00	1	33	0.00048	1	U	R.LLEACTFHRV.-
	1856	636.3117	1270.6089	1270.6095	-0.49	0	(4)	0.44	1	U	K.DFHLFSSPHGK.D
	1857	424.5440	1270.6101	1270.6095	0.49	0	15	0.03	1	U	K.DFHLFSSPHGK.D
	2084	661.8256	1321.6366	1321.6337	2.21	0	29	0.0013	1	U	K.CLADGAGDVAFVK.H
	2181	449.5409	1345.6009	1345.6085	-5.61	0	(27)	0.0019	1	U	R.WCTVSNHEVSK.C 2180 2183
	2182	673.8093	1345.6041	1345.6085	-3.26	0	40	0.0001	1	U	R.WCTVSNHEVSK.C
	2199	675.8907	1349.7669	1349.7741	-5.30	0	39	0.00012	1	U	K.SIVPAPPLVACVK.R 2200
	2272	455.5778	1363.7115	1363.7170	-3.99	1	20	0.0096	1	U	R.CLVEKGDVAFVK.H
	2273	682.8656	1363.7166	1363.7170	-0.24	1	(20)	0.011	1	U	R.CLVEKGDVAFVK.H
	2369	695.8560	1389.6975	1389.7001	-1.85	0	59	1.4e-006	1	U	K.NSNFQLNQLQGK.K 2370
	2371	696.3444	1390.6743	1390.6841	-7.03	0	(14)	0.039	1	U	K.NSNFQLNQLQGK.K
	2569	725.3448	1448.6750	1448.6783	-2.28	0	37	0.00022	1	U	K.SSSDPDLTWNSLK.G 2568
	2621	730.3705	1458.7264	1458.7323	-4.05	0	32	0.00067	1	U	R.TAVPNLCQLCVGK.G
	2803	506.9352	1517.7837	1517.7950	-7.44	1	(8)	0.18	1	U	K.KNSNFQLNQLQGK.K
	2804	759.9026	1517.7906	1517.7950	-2.89	1	22	0.0065	1	U	K.KNSNFQLNQLQGK.K
	3030	803.4206	1604.8266	1604.8199	4.22	0	(27)	0.002	1	U	K.TEPQTHYYAVAVVK.K
	3031	535.9497	1604.8273	1604.8199	4.63	0	44	3.7e-005	1	U	K.TEPQTHYYAVAVVK.K 3029
	3063	538.9294	1613.7663	1613.7719	-3.46	1	16	0.026	1	U	R.EDIRPEVPKDECK.K 3062
	3224	829.9185	1657.8224	1657.8246	-1.36	0	33	0.00052	1	U	K.DCYLASIPSHAVVAR.S
	3451	578.6410	1732.9011	1732.9148	-7.89	1	49	1.2e-005	1	U	K.TEPQTHYYAVAVVKK.N
	3500	879.3887	1756.7628	1756.7661	-1.91	0	51	8.7e-006	1	U	K.AVSNFFAGSCVPCADR.T 3499
	3586	896.9622	1791.9098	1791.9229	-7.34	0	39	0.00012	1	U	R.TAGWNIPMGLLYSEIK.H
	3798	934.9504	1867.8863	1867.8622	12.9	0	64	3.7e-007	1	U	R.DDTQCLANLQPTTTYK.T
	4046	655.2962	1962.8668	1962.8676	-0.42	0	127	2e-013	1	U	K.AACVCQELHNQQASYGK.N 4045
	4047	982.4437	1962.8728	1962.8676	2.63	0	(114)	3.9e-012	1	U	K.AACVCQELHNQQASYGK.N
	4112	665.6085	1993.8037	1993.8087	-2.50	0	66	2.3e-007	1	U	K.CACSNHEPYFGYSGAFK.C 4110 4111 4114
	4113	997.9100	1993.8055	1993.8087	-1.60	0	(55)	3.3e-006	1	U	K.CACSNHEPYFGYSGAFK.C
	4244	692.6581	2074.9526	2074.9630	-5.00	0	108	1.6e-011	1	U	R.SGSACVDTPEEGYHAVAVVK.S 4247
	4246	1038.4924	2074.9703	2074.9630	3.53	0	(43)	5.2e-005	1	U	R.SGSACVDTPEEGYHAVAVVK.S
	4309	704.3216	2109.9430	2109.9464	-1.64	1	85	3.1e-009	1	U	K.HQTVEQNTDGRNPDDWAK.D 4308
	4415	719.0303	2154.0690	2154.1031	-15.82	1	40	9e-005	1	U	K.IVKGEADAMSLDGGFIYIAGK.C
	4503	1105.5848	2209.1551	2209.1684	-6.00	0	23	0.005	1	U	R.SAGWNIPIGLLYWQLPEPR.E
	4541	741.0093	2220.0060	2220.0052	0.38	1	45	3.1e-005	1	U	K.EKAACVCQELHNQQASYGK.N
	4562	743.3733	2227.0980	2227.0909	3.20	0	46	2.7e-005	1	U	K.EDLIWGLLNQAQEHFGTEK.S
	4855	1186.5950	2371.1754	2371.1922	-7.10	0	28	0.0017	1	U	R.IPPAMDTWLYLGYEYVTAIR.N
	4872	595.7927	2379.1418	2379.1529	-4.66	1	(5)	0.33	1	U	K.SVDEYKDCYLASIPSHAVVAR.S
	4874	794.0561	2379.1464	2379.1529	-2.70	1	58	1.7e-006	1	U	K.SVDEYKDCYLASIPSHAVVAR.S 4873
	5380	896.0825	2685.2255	2685.2816	-20.89	1	70	1e-007	1	U	K.HSTVLENLPQEADRDEYQLLCR.D 5381
	5382	672.3292	2685.2875	2685.2816	2.20	1	(10)	0.11	1	U	K.HSTVLENLPQEADRDEYQLLCR.D
	5417	905.4605	2713.3597	2713.3347	9.20	1	116	2.4e-012	1	U	R.SVDGKEDLIWGLLNQAQEHFGTEK.S
	5418	679.3501	2713.3713	2713.3347	13.5	1	(33)	0.00052	1	U	R.SVDGKEDLIWGLLNQAQEHFGTEK.S
	5692	1473.5961	2945.1776	2945.1750	0.89	0	133	4.7e-014	1	U	K.CDEWSVNSGGNIECESAQSTEDCIAK.I
	5830	1058.4579	3172.3518	3172.3383	4.25	1	116	2.3e-012	1	U	K.VKCDEWSVNSGGNIECESAQSTEDCIAK.I 5829
5.	Q2TU62 Mass: 100072 Score: 1865 Matches: 64(48) Sequences: 26(21) emPAI: 1.31
	Calcium-activated chloride channel regulator 1 OS=Equus caballus OX=9796 GN=CLCA1 PE=1 SV=1
	Query	Observed	Mr(expt)	Mr(calc)	ppm	Miss	Score	Expect	Rank	Unique	Peptide
	741	445.7400	889.4654	889.4658	-0.37	0	5	0.29	1	U	R.STWEVIR.D 740
	1056	515.7938	1029.5730	1029.5706	2.30	0	20	0.0089	1	U	K.INIDDLLSK.Q 1054 1055
	1102	522.8038	1043.5930	1043.5975	-4.31	0	42	6.4e-005	1	U	R.ISTNILDLR.D
	1286	553.8296	1105.6446	1105.6172	24.8	0	24	0.004	1	U	K.FPSPVVVYAK.I
	1314	557.3114	1112.6083	1112.6091	-0.74	0	12	0.066	1	U	K.VWALGGVNAAR.Q 1313
	1532	589.8174	1177.6203	1177.6165	3.24	0	12	0.063	1	U	K.MAYLQVPGTAK.V 1531
	1634	603.7805	1205.5465	1205.5465	-0.03	0	33	0.00055	1	U	R.YFTAYNTNGR.Y 1633
	1639	604.2761	1206.5376	1206.5305	5.83	0	(18)	0.015	1	U	R.YFTAYNTNGR.Y 1638
	1695	612.2982	1222.5818	1222.5830	-1.02	0	82	6.9e-009	1	U	K.QDGFVVDTNTK.M 1694
	1919	641.8557	1281.6968	1281.7081	-8.85	0	20	0.0097	1	U	K.NVAILVPENWK.T 1920
	1959	431.8975	1292.6706	1292.6778	-5.56	0	47	1.9e-005	1	U	R.VFVHEWAHLR.W 1957 1958 1960
	2024	652.3628	1302.7110	1302.7031	6.10	0	89	1.2e-009	1	U	R.ATVTALIESVDGK.T 2020 2022
	2204	676.3492	1350.6839	1350.6780	4.42	1	53	4.8e-006	1	U	K.KQDGFVVDTNTK.M 2203
	2253	679.8779	1357.7413	1357.7453	-2.94	0	34	0.00041	1	U	R.ASSATLPPVTVTSK.V 2254 2256
	2480	710.8811	1419.7477	1419.7623	-10.28	0	48	1.7e-005	1	U	K.NGEIIWNPPRPK.I 2481
	2482	474.2606	1419.7600	1419.7623	-1.56	0	(11)	0.087	1	U	K.NGEIIWNPPRPK.I
	2485	711.3718	1420.7291	1420.7463	-12.08	0	(15)	0.031	1	U	K.NGEIIWNPPRPK.I 2488
	2510	714.3834	1426.7523	1426.7609	-6.02	1	(7)	0.18	1	U	R.IYFTPDFLAGKR.L
	2513	476.5935	1426.7586	1426.7609	-1.60	1	48	1.5e-005	1	U	R.IYFTPDFLAGKR.L
	2769	503.2740	1506.8000	1506.8082	-5.44	1	(28)	0.0015	1	U	K.DTGKFPSPVVVYAK.I 2771
	2772	754.4156	1506.8167	1506.8082	5.64	1	40	0.0001	1	U	K.DTGKFPSPVVVYAK.I 2770
	2823	764.8342	1527.6539	1527.6630	-5.96	0	41	7.3e-005	1	U	R.WGLFNEYNDDQK.F 2825 2826
	3232	831.9205	1661.8265	1661.8407	-8.53	0	60	1.1e-006	1	U	K.SLPTVASGGTSICSGLR.S
	3564	446.2388	1780.9262	1780.9359	-5.43	1	12	0.064	1	U	K.TKPEYERPKLETYK.N 3565
	3996	648.9536	1943.8390	1943.8513	-6.32	0	6	0.27	1	U	K.NVVNHCQGGSCATKPCR.R
	4088	662.6581	1984.9526	1984.9564	-1.92	1	101	8.9e-011	1	U	K.DMVTQASPYLFEATEKR.F 4087
	4090	993.4844	1984.9543	1984.9564	-1.05	1	(73)	5.2e-008	1	U	K.DMVTQASPYLFEATEKR.F 4089
	4743	1156.6317	2311.2489	2311.1995	21.4	0	39	0.00012	1	U	K.TTPMTAQPPQPTFSLLQIGQR.I
	4892	1193.0475	2384.0804	2384.0842	-1.59	0	94	3.6e-010	1	U	R.VTGLYAQECEFIPDEQQTEK.A 4891
	5095	832.4139	2494.2198	2494.2187	0.44	1	155	3e-016	1	U	K.TVTLELLDNGAGADATKDDGIYSR.Y 5097
	5096	1248.1196	2494.2247	2494.2187	2.40	1	(17)	0.018	1	U	K.TVTLELLDNGAGADATKDDGIYSR.Y
	5229	1292.5978	2583.1810	2583.1911	-3.91	0	151	8e-016	1	U	K.NADVLVAEPNPPGNDQPYTEQMGK.C 5228
	5331	1328.6157	2655.2169	2655.2123	1.75	1	(9)	0.12	1	U	R.DRVTGLYAQECEFIPDEQQTEK.A
	5333	886.0841	2655.2305	2655.2123	6.87	1	48	1.6e-005	1	U	R.DRVTGLYAQECEFIPDEQQTEK.A 5334
6.	F6X1X3 Mass: 21514 Score: 1724 Matches: 40(38) Sequences: 5(5) emPAI: 5.57
	Vitelline membrane outer layer 1 homolog OS=Equus caballus OX=9796 GN=VMO1 PE=4 SV=1
	Query	Observed	Mr(expt)	Mr(calc)	ppm	Miss	Score	Expect	Rank	Unique	Peptide
	1998	434.8820	1301.6242	1301.6324	-6.27	1	(31)	0.00077	1	U	R.GLRDDTAVNDAR.F 2000 2002
	1999	651.8212	1301.6278	1301.6324	-3.54	1	69	1.3e-007	1	U	R.GLRDDTAVNDAR.F 2001 2003
	2016	652.3105	1302.6065	1302.6164	-7.56	1	(21)	0.0082	1	U	R.GLRDDTAVNDAR.F 2017
	3347	849.9042	1697.7939	1697.7969	-1.74	0	91	8.4e-010	1	U	R.GNAELNTHVVESESGR.W 3346
	3348	566.9396	1697.7971	1697.7969	0.12	0	(71)	8.3e-008	1	U	R.GNAELNTHVVESESGR.W 3349
	3355	567.2699	1698.7879	1698.7809	4.11	0	(27)	0.002	1	U	R.GNAELNTHVVESESGR.W 3351 3353
	3356	850.4028	1698.7910	1698.7809	5.95	0	(26)	0.0026	1	U	R.GNAELNTHVVESESGR.W 3352
	3495	878.9117	1755.8089	1755.8210	-6.86	0	(101)	8.5e-011	1	U	R.VEAPMTPGDNTAANNVR.F 3496 3497
	3501	879.4060	1756.7975	1756.8050	-4.29	0	(24)	0.0037	1	U	R.VEAPMTPGDNTAANNVR.F 3504
	3502	879.4070	1756.7994	1756.8050	-3.18	0	(37)	0.00019	1	U	R.VEAPMTPGDNTAANNVR.F 3503
	3545	886.9166	1771.8187	1771.8159	1.58	0	110	1e-011	1	U	R.VEAPMTPGDNTAANNVR.F 3542 3544
	3546	887.4055	1772.7965	1772.7999	-1.93	0	(13)	0.053	1	U	R.VEAPMTPGDNTAANNVR.F
	3826	940.4793	1878.9441	1878.9436	0.27	0	(77)	1.8e-008	1	U	K.VEPQQGIPGDDTALNGIR.L 3825 3827
	3838	940.9691	1879.9236	1879.9276	-2.13	0	88	1.6e-009	1	U	K.VEPQQGIPGDDTALNGIR.L 3833 3835 3837 3839 3840 3841 3842
	5570	1420.1119	2838.2093	2838.1902	6.74	0	97	1.8e-010	1	U	R.CSDGTVLEGPGLAWGDYGDWSDPCPK.G
7.	H9GZU9 Mass: 35818 Score: 1540 Matches: 31(28) Sequences: 10(9) emPAI: 2.45
	Uncharacterized protein OS=Equus caballus OX=9796 PE=4 SV=1
	Query	Observed	Mr(expt)	Mr(calc)	ppm	Miss	Score	Expect	Rank	Unique	Peptide
	660	426.7513	851.4881	851.4865	1.94	0	21	0.0071	1		K.ALPAPVER.T
	1333	560.8043	1119.5941	1119.5958	-1.54	0	34	0.00039	1		K.NTVSVTCLVK.D 1332 1334
	3620	903.5002	1804.9859	1804.9836	1.30	0	(55)	3.3e-006	1		R.VVSVLPIQHQDWLSGK.E
	3621	602.6706	1804.9900	1804.9836	3.53	0	118	1.4e-012	1		R.VVSVLPIQHQDWLSGK.E 3622
	4385	1071.5042	2140.9937	2140.9953	-0.72	0	118	1.5e-012	1	U	K.YSTTPAQLNSDGSYFLYSK.L 4386
	4388	1071.9745	2141.9344	2141.9793	-20.96	0	(70)	8.9e-008	1	U	K.YSTTPAQLNSDGSYFLYSK.L 4387 4389 4390 4391
	5011	613.7672	2451.0397	2451.0583	-7.59	0	(83)	4.6e-009	1	U	K.QGESFTCGVMHEAVENHYTQK.N 5013 5015
	5012	818.0206	2451.0401	2451.0583	-7.46	0	123	5.3e-013	1	U	K.QGESFTCGVMHEAVENHYTQK.N 5014
	5017	614.0109	2452.0144	2452.0424	-11.42	0	(45)	3.1e-005	1	U	K.QGESFTCGVMHEAVENHYTQK.N
	5307	1321.5577	2641.1009	2641.1609	-22.69	0	(8)	0.16	1	U	K.DFYPPEIDVEWQSNEHPEPEGK.Y 5310
	5308	881.3743	2641.1010	2641.1609	-22.67	0	22	0.0062	1	U	K.DFYPPEIDVEWQSNEHPEPEGK.Y
	5311	881.7096	2642.1070	2642.1449	-14.35	0	(16)	0.028	1	U	K.DFYPPEIDVEWQSNEHPEPEGK.Y
	5489	692.3138	2765.2260	2765.2326	-2.39	1	94	3.7e-010	1	U	R.WKQGESFTCGVMHEAVENHYTQK.N 5488
	5554	705.8379	2819.3225	2819.3483	-9.17	0	151	7.6e-016	1	U	K.GDIHTFPLDLSNSAHHSLSSMMAVPR.S 5553 5555
	5584	1426.2120	2850.4095	2850.3721	13.1	0	59	1.2e-006	1	U	K.VPVGCLVSNYFPEPVTVSWNCDALK.G
	6323	1043.0197	4168.0495	4167.9736	18.2	0	8	0.17	1	U	R.KPEVTCVVVDLGHDDPDVQFTWFVDGVETHTATTEPK.E
8.	F6SJK9 Mass: 39128 Score: 1407 Matches: 47(41) Sequences: 15(13) emPAI: 4.95
	Uncharacterized protein OS=Equus caballus OX=9796 PE=3 SV=1
	Query	Observed	Mr(expt)	Mr(calc)	ppm	Miss	Score	Expect	Rank	Unique	Peptide
	554	404.2003	806.3861	806.3923	-7.66	0	25	0.0035	1		R.LAADDFR.L 556 557
	565	405.2231	808.4316	808.4330	-1.77	0	4	0.37	1		R.LASYLDK.V
	1153	532.8029	1063.5913	1063.6026	-10.61	1	11	0.084	1		R.LASYLDKVR.A
	1225	545.7701	1089.5257	1089.5237	1.88	0	(33)	0.00055	1		K.VTMQNLNDR.L 1224 1226
	1229	546.2545	1090.4945	1090.5077	-12.11	0	(32)	0.0006	1		K.VTMQNLNDR.L 1228 1230
	1282	553.7630	1105.5114	1105.5186	-6.47	0	42	5.7e-005	1		K.VTMQNLNDR.L 1280 1281 1283 1284 188
	1301	555.2503	1108.4861	1108.4825	3.20	0	28	0.0016	1		K.DAEAWFNEK.S 1299 1300
	1489	583.2930	1164.5715	1164.5775	-5.12	0	47	1.9e-005	1	U	R.LENEIQTYR.S 1486 1488 1493
	1566	594.3506	1186.6866	1186.6921	-4.64	1	28	0.0014	1	U	R.RVLDELTLTK.A
	1618	601.3088	1200.6031	1200.6098	-5.60	0	56	2.4e-006	1		R.QSVEADINGLR.R 1617
	1624	601.8014	1201.5882	1201.5939	-4.68	0	(12)	0.066	1		R.QSVEADINGLR.R
	1731	619.2972	1236.5798	1236.5775	1.89	1	54	4.4e-006	1	U	R.KDAEAWFNEK.S
	2229	453.2402	1356.6987	1356.7110	-9.04	1	(26)	0.0023	1		R.QSVEADINGLRR.V
	2230	679.3571	1356.6997	1356.7110	-8.31	1	42	6.1e-005	1		R.QSVEADINGLRR.V 2232
	2244	453.5678	1357.6815	1357.6950	-9.91	1	(23)	0.0047	1		R.QSVEADINGLRR.V
	2245	679.8504	1357.6863	1357.6950	-6.41	1	(34)	0.00039	1		R.QSVEADINGLRR.V
	2332	691.3196	1380.6247	1380.6408	-11.67	0	79	1.3e-008	1	U	R.ALEESNYELEGK.I 2333
	2366	695.8433	1389.6721	1389.6736	-1.05	0	77	2e-008	1	U	K.QSLEASLAETEGR.Y 2367 2368
	2537	478.9240	1433.7503	1433.7626	-8.60	1	(18)	0.015	1	U	K.IRLENEIQTYR.S
	2538	717.8858	1433.7571	1433.7626	-3.89	1	50	9.3e-006	1	U	K.IRLENEIQTYR.S
	4274	1048.5183	2095.0221	2095.0394	-8.29	0	105	3.3e-011	1	U	K.ADLEMQIESLTEELAYLK.K
	4310	1056.5170	2111.0194	2111.0343	-7.09	0	(83)	4.9e-009	1	U	K.ADLEMQIESLTEELAYLK.K
	4548	1112.5649	2223.1153	2223.1344	-8.57	1	(101)	7.5e-011	1	U	K.ADLEMQIESLTEELAYLKK.N
	4549	742.0492	2223.1258	2223.1344	-3.88	1	(94)	4.3e-010	1	U	K.ADLEMQIESLTEELAYLKK.N 4550
	4586	747.3770	2239.1092	2239.1293	-8.97	1	125	3.5e-013	1	U	K.ADLEMQIESLTEELAYLKK.N
	Proteins matching the same set of peptides:
	F6SQQ0 Mass: 42063 Score: 1407 Matches: 47(41) Sequences: 15(13)
	Uncharacterized protein OS=Equus caballus OX=9796 PE=3 SV=1
	F6SS14 Mass: 49929 Score: 1407 Matches: 47(41) Sequences: 15(13)
	Uncharacterized protein OS=Equus caballus OX=9796 PE=3 SV=1
	F6WDW3 Mass: 42694 Score: 1407 Matches: 47(41) Sequences: 15(13)
	Uncharacterized protein OS=Equus caballus OX=9796 PE=3 SV=1
9.	F6ZXW9 Mass: 200898 Score: 1372 Matches: 35(31) Sequences: 23(21) emPAI: 0.47
	Uncharacterized protein OS=Equus caballus OX=9796 PE=4 SV=1
	Query	Observed	Mr(expt)	Mr(calc)	ppm	Miss	Score	Expect	Rank	Unique	Peptide
	892	481.7552	961.4959	961.4981	-2.26	0	24	0.0043	1	U	R.GNPAVSYVR.L
	931	494.2474	986.4802	986.4855	-5.39	0	5	0.31	1	U	K.DGQAICVPK.Y
	937	495.7665	989.5184	989.5216	-3.19	1	14	0.041	1	U	K.VKVNGVDMK.L
	1042	514.7795	1027.5445	1027.5484	-3.81	0	40	9.4e-005	1	U	K.LPMVLDQGR.V
	1545	394.8822	1181.6247	1181.6305	-4.95	0	19	0.013	1	U	R.SVTLHIYGHR.L
	2402	699.8467	1397.6789	1397.6787	0.19	0	72	6.7e-008	1	U	R.SAIGSSGVYEVSSR.C 2403
	2747	749.3443	1496.6740	1496.6712	1.92	0	37	0.00022	1	U	R.GSCAALSGLTGCTSR.C 2746
	2775	755.4251	1508.8357	1508.8675	-21.09	0	35	0.00031	1	U	R.VNGVLTALPVSVAGGR.L
	3134	545.5788	1633.7146	1633.7220	-4.55	0	(12)	0.06	1	U	K.DDFQKPDGSQASDPK.D
	3135	817.8703	1633.7260	1633.7220	2.48	0	15	0.029	1	U	K.DDFQKPDGSQASDPK.D
	3183	549.2693	1644.7862	1644.8042	-10.95	0	(56)	2.5e-006	1	U	R.CLANGGIHYVTLDGR.V
	3187	549.6050	1645.7931	1645.7882	2.96	0	60	1.1e-006	1	U	R.CLANGGIHYVTLDGR.V
	3217	552.9101	1655.7085	1655.7144	-3.62	0	73	5.6e-008	1	U	R.IEDGVQACHPTGCGR.C
	3612	600.6328	1798.8766	1798.8858	-5.14	0	44	4e-005	1	U	K.FCGLLASPTGPLAACHK.L
	3766	928.8694	1855.7242	1855.7214	1.52	0	151	7.4e-016	1	U	K.LCGACGNFDGDQTNDGR.G 3765
	3999	974.4224	1946.8302	1946.8509	-10.63	0	44	3.7e-005	1	U	R.YYPLGEAFYPGPECER.R 3998
	4280	1050.4536	2098.8927	2098.9017	-4.28	0	127	2.1e-013	1	U	R.CSCSASAGLTCQAAGCLLGR.V
	4290	701.9850	2102.9331	2102.9520	-8.97	1	10	0.096	1	U	R.YYPLGEAFYPGPECERR.C
	4424	1082.4395	2162.8644	2162.8779	-6.28	0	(29)	0.0012	1	U	K.DPCQDVNCRPQETCQEK.D
	4425	721.9661	2162.8765	2162.8779	-0.65	0	64	4.4e-007	1	U	K.DPCQDVNCRPQETCQEK.D 4426
	4859	792.6987	2375.0744	2375.0821	-3.25	0	73	4.7e-008	1	U	R.FLLSDGVCIPIQDCGCTHAGR.Y
	4981	606.7591	2423.0073	2423.0093	-0.84	0	(52)	6.5e-006	1	U	R.TDSFCPLECPAHSHYSVCTR.S 4982
	4983	808.6810	2423.0213	2423.0093	4.93	0	69	1.2e-007	1	U	R.TDSFCPLECPAHSHYSVCTR.S
	5168	634.5428	2534.1420	2534.1648	-9.00	1	50	9.1e-006	1	U	R.LRDPEGPFAGCHAELSPSEYFR.Q 5170
	5724	748.0606	2988.2133	2988.2153	-0.68	1	38	0.00017	1	U	R.RCECGQGGLVSCQEGAACRPYEECR.I
	5798	783.8409	3131.3344	3131.3529	-5.90	1	70	9.3e-008	1	U	K.DPCQDVNCRPQETCQEKDGQAICVPK.Y
	6203	1272.5334	3814.5785	3814.5750	0.92	0	111	8e-012	1	U	R.APSSLQGCGEGCGPQGCPVCLAQETAAYESTEACGR.L 6204
10.	F7DJZ1 Mass: 51400 Score: 1318 Matches: 43(33) Sequences: 19(19) emPAI: 2.92
	BPI fold containing family B member 1 OS=Equus caballus OX=9796 GN=BPIFB1 PE=4 SV=1
	Query	Observed	Mr(expt)	Mr(calc)	ppm	Miss	Score	Expect	Rank	Unique	Peptide
	255	301.2067	600.3988	600.3959	4.94	0	15	0.035	1		R.LSLLR.R 254
	826	465.7798	929.5451	929.5368	8.97	0	21	0.0078	1		R.LPLLSTMR.E 827 828
	864	473.7751	945.5357	945.5317	4.25	0	(11)	0.079	1		R.LPLLSTMR.E 862
	1325	559.3147	1116.6148	1116.6213	-5.76	0	41	8e-005	1	U	K.LSSGIPVSMVK.A 1326 1327
	1377	567.3124	1132.6102	1132.6162	-5.29	0	(25)	0.0034	1	U	K.LSSGIPVSMVK.A 1378
	1737	620.3096	1238.6046	1238.6044	0.16	0	46	2.3e-005	1		K.DHDAVDILWR.L
	1990	651.3676	1300.7206	1300.7252	-3.54	0	56	2.5e-006	1	U	K.HDVIQLHLQAK.L 1993
	1994	434.5831	1300.7276	1300.7252	1.85	0	(54)	4.5e-006	1	U	K.HDVIQLHLQAK.L 1991 1992 1995
	2396	698.8832	1395.7518	1395.7510	0.55	1	46	2.7e-005	1	U	R.RFSFLVNSLADK.V 2397
	2401	699.3729	1396.7312	1396.7350	-2.77	1	(6)	0.24	1	U	R.RFSFLVNSLADK.V
	2695	494.2678	1479.7816	1479.7834	-1.19	1	56	2.8e-006	1		K.LKDHDAVDILWR.L 2697 2698
	2904	779.9647	1557.9149	1557.9204	-3.55	0	51	7.4e-006	1	U	K.VMSFLLPTLPTLVK.S
	3388	856.4520	1710.8895	1710.9152	-15.03	0	65	3.2e-007	1	U	K.IVTQETPELLLDQGR.A 3389
	3527	883.4076	1764.8006	1764.8175	-9.54	0	43	4.5e-005	1	U	K.SQLCPVIEAAFEDMR.E
	3538	885.5041	1768.9936	1768.9571	20.7	0	88	1.6e-009	1	U	K.VISETAADQLGPTQIVK.I 3536 3537
	3550	887.5002	1772.9858	1773.0036	-10.05	0	40	9.5e-005	1	U	K.VAQLIVLEVFATSEVR.R
	3811	625.3185	1872.9336	1872.9073	14.0	0	24	0.0036	1		K.SIVEMHMETEAQAIIR.V
	3929	958.9778	1915.9410	1915.9561	-7.85	0	110	1.1e-011	1	U	K.DITAEMLTSALLPNENGK.L
	3934	959.4716	1916.9287	1916.9401	-5.93	0	(8)	0.15	1	U	K.DITAEMLTSALLPNENGK.L
	4067	658.0302	1971.0688	1971.0863	-8.88	0	(49)	1.4e-005	1		R.EKPAGGNPILGSLVTFLMK.Y
	4068	986.5421	1971.0696	1971.0863	-8.50	0	85	3.4e-009	1		R.EKPAGGNPILGSLVTFLMK.Y
	4431	722.7316	2165.1731	2165.1732	-0.07	0	63	5.1e-007	1	U	R.VPVSLSSDHLQFDLLSPAIK.H
	4655	1141.0452	2280.0758	2280.0944	-8.16	0	92	6.9e-010	1	U	K.ALGFEAASCSLTNDALVVTPASS.-
	4899	798.0510	2391.1312	2391.1562	-10.45	1	84	4.3e-009	1	U	K.SQLCPVIEAAFEDMREDLLR.L
	5009	817.8022	2450.3847	2450.3380	19.1	0	(5)	0.31	1		K.VTSANILQLQIQPSADGQELVVK.V
	5010	1226.2015	2450.3885	2450.3380	20.6	0	96	2.4e-010	1		K.VTSANILQLQIQPSADGQELVVK.V
11.	H9GZT5 Mass: 36409 Score: 1315 Matches: 45(40) Sequences: 14(13) emPAI: 5.23
	Uncharacterized protein OS=Equus caballus OX=9796 PE=4 SV=1
	Query	Observed	Mr(expt)	Mr(calc)	ppm	Miss	Score	Expect	Rank	Unique	Peptide
	616	417.2269	832.4392	832.4477	-10.18	0	13	0.049	1	U	K.DVLMISR.T
	620	834.4534	833.4462	832.4477	1199	0	(6)	0.23	1	U	K.DVLMISR.T
	660	426.7513	851.4881	851.4865	1.94	0	21	0.0071	1		K.ALPAPVER.T
	770	453.2607	904.5068	904.5052	1.78	0	8	0.16	1		K.VSVTCLVK.D 769
	1295	554.3460	1106.6775	1106.6812	-3.35	0	45	2.9e-005	1	U	R.VVSILAIQHK.D 1294 1297
	1296	369.9005	1106.6798	1106.6812	-1.24	0	(34)	0.00044	1	U	R.VVSILAIQHK.D 1292 1293
	1434	574.3283	1146.6421	1146.6431	-0.89	1	20	0.0092	1	U	K.NKVSVTCLVK.D 1433
	2034	654.8503	1307.6861	1307.6986	-9.54	0	39	0.00014	1	U	R.EPQVYVLAPHR.D
	2864	771.3688	1540.7231	1540.7086	9.44	0	46	2.7e-005	1	U	K.DFYPTDIDIEWK.S
	3520	588.6138	1762.8195	1762.8308	-6.44	0	116	2.4e-012	1		K.SQTYICNVAHPASSTK.V 3523 3525
	3522	882.4223	1762.8301	1762.8308	-0.44	0	(87)	2.2e-009	1		K.SQTYICNVAHPASSTK.V 3524
	3588	449.2565	1792.9969	1793.0199	-12.85	1	(17)	0.02	1	U	R.VVSILAIQHKDWLSGK.E
	3589	598.6760	1793.0062	1793.0199	-7.64	1	39	0.00013	1	U	R.VVSILAIQHKDWLSGK.E
	3844	471.0011	1879.9754	1879.9792	-2.01	1	(35)	0.00034	1	U	R.EPQVYVLAPHRDELSK.N 3843
	3847	940.9993	1879.9840	1879.9792	2.55	1	67	2.1e-007	1	U	R.EPQVYVLAPHRDELSK.N 3845
	3850	627.6722	1879.9947	1879.9792	8.26	1	(60)	9.6e-007	1	U	R.EPQVYVLAPHRDELSK.N 3846 3848 3849
	4388	1071.9745	2141.9344	2141.9793	-20.96	0	70	8.9e-008	1	U	K.YSTTPAQLDSDGSYFLYSK.L 4387 4389 4390 4391
	5516	698.0833	2788.3041	2788.2486	19.9	0	61	8.7e-007	1	U	R.WQQGTTFTCAVMHEALHNHYTEK.S 5514 5515
	5517	930.4449	2788.3130	2788.2486	23.1	0	(32)	0.0007	1	U	R.WQQGTTFTCAVMHEALHNHYTEK.S
	5539	702.0565	2804.1970	2804.2435	-16.60	0	(27)	0.0022	1	U	R.WQQGTTFTCAVMHEALHNHYTEK.S 5538 5541
	5542	935.7578	2804.2516	2804.2435	2.88	0	(21)	0.0085	1	U	R.WQQGTTFTCAVMHEALHNHYTEK.S
	5660	974.1048	2919.2926	2919.3428	-17.21	0	22	0.0059	1	U	K.ECGGCPTCPECLSVGPSVFIFPPKPK.D
	6319	1040.9822	4159.8996	4159.9474	-11.50	0	67	1.8e-007	1	U	R.TPTVTCVVVDVGHDFPDVQFNWYVDGVETHTATTEPK.Q
12.	F6ZEQ3 Mass: 50796 Score: 1150 Matches: 46(36) Sequences: 18(14) emPAI: 2.51
	Keratin 16 OS=Equus caballus OX=9796 GN=KRT16 PE=3 SV=1
	Query	Observed	Mr(expt)	Mr(calc)	ppm	Miss	Score	Expect	Rank	Unique	Peptide
	554	404.2003	806.3861	806.3923	-7.66	0	25	0.0035	1		R.LAADDFR.T 556 557
	565	405.2231	808.4316	808.4330	-1.77	0	4	0.37	1		R.LASYLDK.V
	1049	515.3134	1028.6122	1028.5866	24.9	0	34	0.00043	1		R.VLDELTLAR.T 1048
	1082	518.7678	1035.5210	1035.5250	-3.89	1	5	0.31	1		K.IRDWYQR.Q 1084
	1153	532.8029	1063.5913	1063.6026	-10.61	1	11	0.084	1		R.LASYLDKVR.A
	1281	553.7627	1105.5108	1104.5233	894	0	8	0.16	2	U	K.ITMQNLNDR.L 1280 1282 1283 1284
	1347	561.7969	1121.5792	1121.5717	6.73	0	33	0.00046	1		R.LEQEIATYR.R 1344 1346
	1410	571.2441	1140.4737	1140.4757	-1.73	0	22	0.0067	1	U	R.DQYEQMAEK.N 1411
	1557	593.3440	1184.6734	1184.6877	-12.04	1	28	0.0016	1		R.RVLDELTLAR.T
	1618	601.3088	1200.6031	1200.6098	-5.60	0	56	2.4e-006	1		R.QSVEADINGLR.R 1617
	1624	601.8014	1201.5882	1201.5939	-4.68	0	(12)	0.066	1		R.QSVEADINGLR.R
	1681	610.8096	1219.6046	1219.5932	9.36	0	78	1.6e-008	1		K.ASLENSLEETK.G 1679 1680
	1685	611.2923	1220.5700	1220.5772	-5.85	0	(18)	0.015	1		K.ASLENSLEETK.G
	1743	621.2992	1240.5838	1240.5870	-2.53	0	35	0.00035	1	U	K.NHEEEMLALR.G
	2229	453.2402	1356.6987	1356.7110	-9.04	1	(26)	0.0023	1		R.QSVEADINGLRR.V
	2230	679.3571	1356.6997	1356.7110	-8.31	1	42	6.1e-005	1		R.QSVEADINGLRR.V 2232
	2244	453.5678	1357.6815	1357.6950	-9.91	1	(23)	0.0047	1		R.QSVEADINGLRR.V
	2245	679.8504	1357.6863	1357.6950	-6.41	1	(34)	0.00039	1		R.QSVEADINGLRR.V
	2287	457.2346	1368.6820	1368.6819	0.07	1	19	0.012	1	U	R.KNHEEEMLALR.G 2285
	2328	690.3672	1378.7198	1378.7204	-0.45	1	82	5.7e-009	1		K.TRLEQEIATYR.R 2324 2327 2329
	2533	478.5788	1432.7146	1432.7157	-0.83	1	(64)	4.1e-007	1		K.ASLENSLEETKGR.Y 2532
	2534	717.3649	1432.7153	1432.7157	-0.31	1	96	2.4e-010	1		K.ASLENSLEETKGR.Y
	3883	633.2999	1896.8780	1896.8709	3.70	1	36	0.00024	1	U	R.ILNEMRDQYEQMAEK.N
	3884	949.4479	1896.8813	1896.8709	5.48	1	(16)	0.023	1	U	R.ILNEMRDQYEQMAEK.N
	4266	1044.4930	2086.9715	2086.9590	6.02	0	107	1.8e-011	1	U	R.GQTGGDVNVEMDAAPGVDLSR.I 4265
13.	F7ATL5 Mass: 41012 Score: 1108 Matches: 40(32) Sequences: 16(11) emPAI: 1.97
	Keratin 14 OS=Equus caballus OX=9796 GN=KRT14 PE=3 SV=1
	Query	Observed	Mr(expt)	Mr(calc)	ppm	Miss	Score	Expect	Rank	Unique	Peptide
	378	350.7318	699.4491	699.4531	-5.62	0	9	0.12	1		K.ILLDVK.T 379
	554	404.2003	806.3861	806.3923	-7.66	0	25	0.0035	1		R.LAADDFR.T 556 557
	565	405.2231	808.4316	808.4330	-1.77	0	4	0.37	1		R.LASYLDK.V
	1049	515.3134	1028.6122	1028.5866	24.9	0	34	0.00043	1		R.VLDELTLAR.T 1048
	1082	518.7678	1035.5210	1035.5250	-3.89	1	5	0.31	1		K.IRDWYQR.Q 1084
	1153	532.8029	1063.5913	1063.6026	-10.61	1	11	0.084	1		R.LASYLDKVR.A
	1347	561.7969	1121.5792	1121.5717	6.73	0	33	0.00046	1		R.LEQEIATYR.R 1344 1346
	1421	572.7435	1143.4724	1143.4873	-13.03	0	24	0.0044	1		K.DAEDWFFSK.T
	1557	593.3440	1184.6734	1184.6877	-12.04	1	28	0.0016	1		R.RVLDELTLAR.T
	1681	610.8096	1219.6046	1219.5932	9.36	0	78	1.6e-008	1		K.ASLENSLEETK.G 1679 1680
	1685	611.2923	1220.5700	1220.5772	-5.85	0	(18)	0.015	1		K.ASLENSLEETK.G
	1845	633.8383	1265.6620	1265.6615	0.34	1	40	9.4e-005	1	U	R.TKYETELNLR.L 1842 1843 1844
	2264	681.3546	1360.6946	1360.6834	8.19	0	85	3.2e-009	1		R.EVATNSELVQSGK.S 2262 2263
	2269	681.8383	1361.6621	1361.6674	-3.92	0	(55)	3.5e-006	1		R.EVATNSELVQSGK.S 2267 2268
	2328	690.3672	1378.7198	1378.7204	-0.45	1	82	5.7e-009	1		K.TRLEQEIATYR.R 2324 2327 2329
	2533	478.5788	1432.7146	1432.7157	-0.83	1	(64)	4.1e-007	1		K.ASLENSLEETKGR.Y 2532
	2534	717.3649	1432.7153	1432.7157	-0.31	1	96	2.4e-010	1		K.ASLENSLEETKGR.Y
	2546	480.2358	1437.6855	1437.6922	-4.63	1	21	0.0085	1		R.ILNEMRDQYEK.M
	2547	719.8511	1437.6876	1437.6922	-3.18	1	(13)	0.052	1		R.ILNEMRDQYEK.M
	4291	702.0177	2103.0313	2103.0444	-6.22	1	3	0.5	1		K.TEELNREVATNSELVQSGK.S
14.	H9GZQ9 Mass: 37414 Score: 1024 Matches: 29(21) Sequences: 13(10) emPAI: 2.01
	Uncharacterized protein OS=Equus caballus OX=9796 PE=4 SV=1
	Query	Observed	Mr(expt)	Mr(calc)	ppm	Miss	Score	Expect	Rank	Unique	Peptide
	654	425.2220	848.4294	848.4426	-15.59	0	7	0.19	1	U	K.DTLMITR.T
	770	453.2607	904.5068	904.5052	1.78	0	8	0.16	1		K.VSVTCLVK.D 769
	1335	560.8226	1119.6306	1119.6322	-1.43	1	14	0.036	1		K.SKVSVTCLVK.D
	1576	595.8147	1189.6148	1189.6091	4.83	0	5	0.29	1	U	R.IEPIPNNHQK.V
	1651	606.3087	1210.6029	1210.6095	-5.44	0	36	0.00024	1	U	R.IQHQDWLSGK.E 1653
	1652	404.5433	1210.6081	1210.6095	-1.14	0	(11)	0.08	1	U	R.IQHQDWLSGK.E 1655
	2316	689.8752	1377.7358	1377.7364	-0.45	0	50	1e-005	1	U	K.VNNQALPQPIER.T 2317 2329
	2325	690.3632	1378.7118	1378.7204	-6.29	0	(6)	0.26	1	U	K.VNNQALPQPIER.T
	2458	708.3090	1414.6035	1414.6340	-21.55	0	(41)	8.1e-005	1	U	K.FNWYMDGVEVR.T 2457 2459 2460
	2529	716.3206	1430.6266	1430.6289	-1.63	0	44	4.3e-005	1	U	K.FNWYMDGVEVR.T
	4185	1019.0083	2036.0021	2036.0215	-9.53	0	88	1.6e-009	1	U	R.SQEPQVYVLAPHPDELSK.S
	4186	679.6887	2036.0443	2036.0215	11.2	0	(83)	5.1e-009	1	U	R.SQEPQVYVLAPHPDELSK.S
	4326	1058.0134	2114.0123	2114.0202	-3.73	0	94	4.4e-010	1		R.TPEVTCVVVDVSQENPDVK.F 4327
	4373	1069.0522	2136.0899	2136.1078	-8.36	0	96	2.5e-010	1	U	K.CPAPELLGGPSVFIFPPNPK.D
	4469	1094.9902	2187.9659	2187.9597	2.86	0	153	5.1e-016	1	U	K.YSTTQAQQDSDGSYFLYSK.L 4470
	5299	1317.6313	2633.2481	2633.2285	7.45	0	53	5.4e-006	1	U	K.DFYPPEINIEWQSNGQPELETK.Y
	5497	925.4213	2773.2422	2773.2490	-2.46	0	(50)	1.1e-005	1	U	R.WQQGTTFTCGVMHEALHNHYTQK.N
	5498	694.3199	2773.2504	2773.2490	0.53	0	69	1.4e-007	1	U	R.WQQGTTFTCGVMHEALHNHYTQK.N 5499
15.	F7BLE3 Mass: 134841 Score: 870 Matches: 37(31) Sequences: 29(23) emPAI: 0.82
	Uncharacterized protein OS=Equus caballus OX=9796 PE=4 SV=1
	Query	Observed	Mr(expt)	Mr(calc)	ppm	Miss	Score	Expect	Rank	Unique	Peptide
	544	400.7536	799.4926	799.4956	-3.75	0	4	0.36	1		K.WLILQK.Q
	933	494.7928	987.5710	987.5713	-0.32	0	20	0.011	1		R.ISLAQSLTR.V
	980	501.7769	1001.5393	1001.5393	-0.04	0	26	0.0024	1		K.TGLQEVEVK.A
	1320	558.3218	1114.6291	1114.6346	-4.90	1	8	0.15	1		K.RQESLELIK.K
	1387	568.8179	1135.6212	1135.6237	-2.23	0	12	0.058	1		K.ANGYLGTVTIK.I
	1608	599.3252	1196.6358	1196.6513	-12.95	0	12	0.067	1		R.DVLLNGVQPSR.A
	1642	604.8027	1207.5908	1207.5947	-3.23	0	37	0.00019	1		R.YYTYLIMNK.G 1643
	1848	634.8691	1267.7236	1267.7176	4.75	0	41	8.6e-005	1		R.LVAYYTLINAK.G
	1968	649.8246	1297.6346	1297.6336	0.77	0	7	0.2	3		K.QHLPGQQMTLK.I
	2106	665.3531	1328.6916	1328.7188	-20.42	0	18	0.016	1		R.VVIEDGTGEAVLK.R
	2258	681.3242	1360.6338	1360.6405	-4.95	0	32	0.00066	1	U	K.DICEGQVNSLAR.S
	2291	685.8646	1369.7147	1369.7242	-6.91	0	51	7.9e-006	1		K.TIYTPGSTVLYR.I 2292
	2805	507.2425	1518.7057	1518.7215	-10.38	0	(53)	5.3e-006	1		K.AGDFLEAHYNNLR.R 2806
	2807	760.3644	1518.7143	1518.7215	-4.73	0	65	3.3e-007	1		K.AGDFLEAHYNNLR.R
	2911	521.9388	1562.7947	1562.7801	9.33	0	28	0.0016	1	U	R.TLDPEHLGQNGVQR.E
	2996	533.2782	1596.8128	1596.8300	-10.80	1	18	0.015	1	U	K.AAVYHYFISDGVKK.T
	3572	596.6570	1786.9491	1786.9618	-7.08	0	53	5.5e-006	1		R.SGIPIVTSPYQIHFTK.T
	3601	599.3141	1794.9206	1794.9450	-13.61	0	29	0.0013	1	U	R.RPYSVAIAGYALAQMGK.L 3602
	3753	617.9698	1850.8877	1850.9163	-15.45	0	31	0.00089	1		K.GQSFVTVHASFGGTTVEK.V
	3763	927.5187	1853.0229	1853.0258	-1.56	0	31	0.00081	1	U	K.LSINTPNSQQPLTITVK.T
	3913	953.5038	1904.9931	1905.0095	-8.58	1	12	0.058	1		K.DSITTWEILAVSLSDKK.G
	4354	1064.0420	2126.0694	2126.0677	0.79	0	146	2.5e-015	1		K.ILLQGTPVAQMAEDAIDGER.L
	4378	713.6703	2137.9890	2137.9957	-3.09	0	23	0.0049	1	U	R.VHYEDSPQQVFSAEFEVK.E
	4417	1078.5626	2155.1107	2155.1121	-0.66	0	37	0.0002	1		R.IPVVTQGSNVQSLTQDDGVAK.L
	4684	763.7413	2288.2022	2288.2263	-10.56	1	41	8.1e-005	1	U	R.NAEEKDVSLTAFVLIALQEAK.D
	4741	771.4116	2311.2129	2311.2132	-0.16	1	16	0.023	1		R.RIPVVTQGSNVQSLTQDDGVAK.L
	4860	792.7473	2375.2201	2375.1685	21.7	1	45	3.1e-005	1	U	R.SQFPESWLWTIEELKEPEK.N
	5149	629.0610	2512.2150	2512.2281	-5.21	0	36	0.00025	1		K.TMQAHPYNTLGGSGNYLHLSVPR.T
	5232	646.8174	2583.2407	2583.2540	-5.17	0	(60)	9e-007	1	U	K.QKPDGVFQEDGPVIHQEMIGGFR.N 5235
	5234	862.0952	2583.2636	2583.2540	3.72	0	110	1.1e-011	1	U	K.QKPDGVFQEDGPVIHQEMIGGFR.N 5233
	6267	1004.2515	4012.9770	4012.9009	19.0	0	17	0.019	1	U	K.HLIVTPSGCGEQNMISMTPTVIAVHYLDQTEQWEK.F
16.	H9GZU8 Mass: 35893 Score: 860 Matches: 14(14) Sequences: 5(5) emPAI: 0.70
	Uncharacterized protein OS=Equus caballus OX=9796 PE=4 SV=1
	Query	Observed	Mr(expt)	Mr(calc)	ppm	Miss	Score	Expect	Rank	Unique	Peptide
	660	426.7513	851.4881	851.4865	1.94	0	21	0.0071	1		R.ALPAPVER.T
	1333	560.8043	1119.5941	1119.5958	-1.54	0	34	0.00039	1		K.NTVSVTCLVK.D 1332 1334
	3520	588.6138	1762.8195	1762.8308	-6.44	0	116	2.4e-012	1		K.SQTYICNVAHPASSTK.V 3523 3525
	3522	882.4223	1762.8301	1762.8308	-0.44	0	(87)	2.2e-009	1		K.SQTYICNVAHPASSTK.V 3524
	4314	1056.9761	2111.9376	2111.9688	-14.76	0	119	1.3e-012	1		K.YSTTPAQLDGDGSYFLYSK.L 4315 4316
	4326	1058.0134	2114.0123	2114.0202	-3.73	0	94	4.4e-010	1		R.TPEVTCVVVDVSQENPDVK.F 4327
17.	F7AGY4 Mass: 60145 Score: 818 Matches: 36(33) Sequences: 17(15) emPAI: 1.34
	Uncharacterized protein OS=Equus caballus OX=9796 PE=3 SV=1
	Query	Observed	Mr(expt)	Mr(calc)	ppm	Miss	Score	Expect	Rank	Unique	Peptide
	604	414.2173	826.4200	826.4225	-3.00	0	12	0.063	1		K.FASFIDK.V
	851	469.7480	937.4815	937.4869	-5.69	0	27	0.0021	1		R.SLYNLGGSK.R 850 852
	1035	513.7643	1025.5140	1025.5142	-0.16	0	49	1.4e-005	1	U	R.SGFSSISVSR.S 1036
	1206	541.8015	1081.5885	1081.5920	-3.28	1	17	0.019	1		K.FASFIDKVR.F
	1289	554.2753	1106.5361	1106.5356	0.46	0	29	0.0012	1		K.AQYEEIAQR.S 1288
	1445	577.2764	1152.5382	1152.5485	-8.93	0	8	0.15	1		K.EYQELMNVK.L
	1494	583.2996	1164.5846	1164.5775	6.08	0	31	0.00083	1	U	K.YEELQVTAGR.H 1487 1492
	1542	591.2785	1180.5425	1180.5434	-0.82	0	36	0.00024	1	U	R.GMQDLVEDFK.N 1540 1541
	1627	602.3154	1202.6162	1202.6295	-11.10	0	40	8.9e-005	1	U	K.WTLLQEQGTK.T 1628 1629
	1692	611.8173	1221.6201	1221.6241	-3.28	0	53	4.9e-006	1		R.TAAENEFVTLK.K 1691
	1830	632.3470	1262.6794	1262.6870	-6.03	0	36	0.00028	1		K.LALDVEIATYR.K 1829 1831
	2009	651.8554	1301.6963	1301.7078	-8.88	0	52	5.9e-006	1		R.SLDLDSIIAEVK.A 2005 2013 2014
	2197	675.8630	1349.7114	1349.7191	-5.67	1	64	4e-007	1		R.TAAENEFVTLKK.D 2194
	2198	450.9125	1349.7157	1349.7191	-2.49	1	(63)	4.8e-007	1		R.TAAENEFVTLKK.D 2196
	2400	699.3599	1396.7052	1396.7350	-21.39	1	14	0.042	2		K.TLNNKFASFIDK.V
	2773	503.2895	1506.8467	1506.8116	23.3	1	60	1e-006	1	U	R.LLKEYQELMNVK.L
	3334	848.4156	1694.8166	1694.8185	-1.11	1	30	0.00097	1		K.DVDAAYMNKVELQAK.V
	3864	945.9777	1889.9409	1889.9635	-11.97	0	69	1.4e-007	1		R.QNLEPLFEQYINNLR.R
	Proteins matching the same set of peptides:
	F7D281 Mass: 59851 Score: 818 Matches: 36(33) Sequences: 17(15)
	Uncharacterized protein OS=Equus caballus OX=9796 GN=KRT6B PE=3 SV=1
18.	F6YIA9 Mass: 48003 Score: 813 Matches: 31(25) Sequences: 14(10) emPAI: 1.08
	Uncharacterized protein OS=Equus caballus OX=9796 GN=KRT17 PE=3 SV=1
	Query	Observed	Mr(expt)	Mr(calc)	ppm	Miss	Score	Expect	Rank	Unique	Peptide
	378	350.7318	699.4491	699.4531	-5.62	0	9	0.12	1		K.ILLDVK.T 379
	554	404.2003	806.3861	806.3923	-7.66	0	25	0.0035	1		R.LAADDFR.T 556 557
	565	405.2231	808.4316	808.4330	-1.77	0	4	0.37	1		R.LASYLDK.V
	1049	515.3134	1028.6122	1028.5866	24.9	0	34	0.00043	1		R.VLDELTLAR.A 1048
	1153	532.8029	1063.5913	1063.6026	-10.61	1	11	0.084	1		R.LASYLDKVR.A
	1347	561.7969	1121.5792	1121.5717	6.73	0	33	0.00046	1		R.LEQEIATYR.R 1344 1346
	1421	572.7435	1143.4724	1143.4873	-13.03	0	24	0.0044	1		K.DAEDWFFSK.T
	1557	593.3440	1184.6734	1184.6877	-12.04	1	28	0.0016	1		R.RVLDELTLAR.A
	1693	611.8295	1221.6444	1221.6353	7.41	1	34	0.00039	1		R.TKFETEQALR.L 1690
	2178	673.3439	1344.6733	1344.6772	-2.91	0	66	2.5e-007	1	U	R.ALEEANTELEVK.I 2177
	2264	681.3546	1360.6946	1360.6834	8.19	0	85	3.2e-009	1		R.EVATNSELVQSGK.S 2262 2263
	2269	681.8383	1361.6621	1361.6674	-3.92	0	(55)	3.5e-006	1		R.EVATNSELVQSGK.S 2267 2268
	2328	690.3672	1378.7198	1378.7204	-0.45	1	82	5.7e-009	1		K.TRLEQEIATYR.R 2324 2327 2329
	2546	480.2358	1437.6855	1437.6922	-4.63	1	21	0.0085	1		R.ILNEMRDQYEK.M
	2547	719.8511	1437.6876	1437.6922	-3.18	1	(13)	0.052	1		R.ILNEMRDQYEK.M
	4291	702.0177	2103.0313	2103.0444	-6.22	1	3	0.5	1		K.TEELNREVATNSELVQSGK.S
19.	F7BTW7 Mass: 185862 Score: 802 Matches: 30(23) Sequences: 25(18) emPAI: 0.39
	Uncharacterized protein OS=Equus caballus OX=9796 GN=LOC100060539 PE=4 SV=1
	Query	Observed	Mr(expt)	Mr(calc)	ppm	Miss	Score	Expect	Rank	Unique	Peptide
	544	400.7536	799.4926	799.4956	-3.75	0	4	0.36	1		K.WLILQK.Q
	933	494.7928	987.5710	987.5713	-0.32	0	20	0.011	1		R.ISLAQSLTR.V
	980	501.7769	1001.5393	1001.5393	-0.04	0	26	0.0024	1		K.TGLQEVEVK.A
	1256	550.2770	1098.5394	1098.5458	-5.81	0	19	0.012	1	U	K.GYTQQLAYR.Q
	1320	558.3218	1114.6291	1114.6346	-4.90	1	8	0.15	1		K.RQESLELIK.K
	1387	568.8179	1135.6212	1135.6237	-2.23	0	12	0.058	1		K.ANGYLGTVTIK.I
	1462	579.3144	1156.6142	1156.6128	1.26	1	11	0.084	1	U	R.YISKYELNK.A
	1608	599.3252	1196.6358	1196.6513	-12.95	0	12	0.067	1		R.DVLLNGVQPSR.A
	1642	604.8027	1207.5908	1207.5947	-3.23	0	37	0.00019	1		R.YYTYLIMNK.G 1643
	1701	614.3258	1226.6371	1226.6407	-3.01	1	49	1.3e-005	1	U	K.KGYTQQLAYR.Q
	1848	634.8691	1267.7236	1267.7176	4.75	0	41	8.6e-005	1		R.LVAYYTLINAK.G
	1968	649.8246	1297.6346	1297.6336	0.77	0	7	0.2	3		K.QHLPGQQMTLK.I
	2106	665.3531	1328.6916	1328.7188	-20.42	0	18	0.016	1		R.VVIEDGTGEAVLK.R
	2291	685.8646	1369.7147	1369.7242	-6.91	0	51	7.9e-006	1		K.TIYTPGSTVLYR.I 2292
	2805	507.2425	1518.7057	1518.7215	-10.38	0	(53)	5.3e-006	1		K.AGDFLEAHYNNLR.R 2806
	2807	760.3644	1518.7143	1518.7215	-4.73	0	65	3.3e-007	1		K.AGDFLEAHYNNLR.R
	2952	527.5822	1579.7248	1579.7341	-5.85	1	21	0.0076	1	U	R.FYHPEKEDGMLSK.L
	3295	842.3730	1682.7314	1682.7246	4.04	0	64	4.3e-007	1	U	K.VYSYYNLDETCTR.F
	3572	596.6570	1786.9491	1786.9618	-7.08	0	53	5.5e-006	1		R.SGIPIVTSPYQIHFTK.T
	3753	617.9698	1850.8877	1850.9163	-15.45	0	31	0.00089	1		K.GQSFVTVHASFGGTTVEK.V
	3913	953.5038	1904.9931	1905.0095	-8.58	1	12	0.058	1		K.DSITTWEILAVSLSDKK.G
	4354	1064.0420	2126.0694	2126.0677	0.79	0	146	2.5e-015	1		K.ILLQGTPVAQMAEDAIDGER.L
	4417	1078.5626	2155.1107	2155.1121	-0.66	0	37	0.0002	1		R.IPVVTQGSNVQSLTQDDGVAK.L
	4422	1080.5027	2158.9908	2158.9754	7.16	0	97	1.9e-010	1	U	R.EEVPAADLSDQVPDTESETK.I 4421
	4741	771.4116	2311.2129	2311.2132	-0.16	1	16	0.023	1		R.RIPVVTQGSNVQSLTQDDGVAK.L
	5149	629.0610	2512.2150	2512.2281	-5.21	0	36	0.00025	1		K.TMQAHPYNTLGGSGNYLHLSVPR.M
	Proteins matching the same set of peptides:
	F7CJG3 Mass: 185390 Score: 802 Matches: 30(23) Sequences: 25(18)
	Uncharacterized protein OS=Equus caballus OX=9796 GN=LOC100060539 PE=4 SV=1
	F7E454 Mass: 183620 Score: 802 Matches: 30(23) Sequences: 25(18)
	Uncharacterized protein OS=Equus caballus OX=9796 GN=LOC100060539 PE=4 SV=1
20.	F6XWM5 Mass: 38310 Score: 800 Matches: 30(25) Sequences: 14(12) emPAI: 2.19
	Haptoglobin OS=Equus caballus OX=9796 PE=3 SV=1
	Query	Observed	Mr(expt)	Mr(calc)	ppm	Miss	Score	Expect	Rank	Unique	Peptide
	469	379.2267	756.4389	756.4381	1.06	0	5	0.3	1	U	K.DIAPTLK.L
	761	450.2798	898.5451	898.5488	-4.09	0	34	0.00037	1	U	R.IIGGLLDAK.G 760
	811	460.7345	919.4544	919.4552	-0.89	0	9	0.12	1	U	K.GSFPWQAK.L
	917	490.7501	979.4856	979.4876	-2.05	0	23	0.0053	1	U	R.VGYVSGWGR.N
	1099	522.7782	1043.5418	1043.5508	-8.54	0	24	0.0042	1	U	R.VMPICLPSK.D 1100
	2174	673.3296	1344.6446	1344.6384	4.65	0	32	0.00067	1	U	K.SCAVAEYGVYVK.V 2173 2175 2176
	2283	684.8170	1367.6195	1367.6205	-0.72	0	44	4.5e-005	1	U	R.SEGDGVYALNSEK.Q 2282
	2357	463.2264	1386.6573	1386.6635	-4.50	0	(37)	0.00021	1	U	K.LPECEAVCGKPK.N 2358
	2360	694.3431	1386.6717	1386.6635	5.90	0	58	1.6e-006	1	U	K.LPECEAVCGKPK.N
	3049	804.9102	1607.8058	1607.7865	12.0	0	92	5.9e-010	1	U	K.YVTLPVADQDTCVK.H 3046 3047
	3151	546.6063	1636.7971	1636.8056	-5.19	1	14	0.042	1	U	R.LRSEGDGVYALNSEK.Q
	3685	611.3017	1830.8833	1830.8968	-7.39	1	60	9.5e-007	1	U	K.ASGTKLPECEAVCGKPK.N 3687
	3694	611.9860	1832.9362	1832.9277	4.66	1	57	1.8e-006	1	U	R.VMPICLPSKDYAQVGR.V 3695
	3805	936.4880	1870.9614	1870.9829	-11.50	0	(28)	0.0016	1	U	K.VVFHPDYQEVDIGLIK.L
	3806	624.6612	1870.9618	1870.9829	-11.31	0	59	1.4e-006	1	U	K.VVFHPDYQEVDIGLIK.L 3807
	4398	1072.5342	2143.0538	2143.0732	-9.05	0	(12)	0.063	1	U	R.SSVGVQPILNEHTFCAGLSK.F
	4400	715.3608	2143.0605	2143.0732	-5.92	0	74	3.9e-008	1	U	R.SSVGVQPILNEHTFCAGLSK.F 4401
21.	F7B7X0 Mass: 66053 Score: 744 Matches: 35(32) Sequences: 8(8) emPAI: 0.79
	Keratin 1 OS=Equus caballus OX=9796 GN=KRT1 PE=3 SV=1
	Query	Observed	Mr(expt)	Mr(calc)	ppm	Miss	Score	Expect	Rank	Unique	Peptide
	1066	517.2630	1032.5114	1032.5087	2.63	0	34	0.00044	1	U	R.TLLEGEESR.M 1065 1067 1068
	1156	533.2626	1064.5106	1064.5138	-3.02	0	23	0.0052	1	U	R.AQYEDIAQK.S 1155
	1159	533.7540	1065.4934	1065.4978	-4.16	0	(7)	0.19	1	U	R.AQYEDIAQK.S
	1830	632.3470	1262.6794	1262.6870	-6.03	0	36	0.00028	1		K.LALDVEIATYR.T 1829 1831
	1834	633.3249	1264.6352	1264.6299	4.20	0	52	6.4e-006	1	U	R.TNAENEFVTIK.K 1833 1835
	1837	633.8070	1265.5995	1265.6139	-11.43	0	(28)	0.0017	1	U	R.TNAENEFVTIK.K 1839 1840
	1838	633.8098	1265.6051	1265.6139	-6.99	0	(24)	0.0036	1	U	R.TNAENEFVTIK.K
	2381	697.3652	1392.7158	1392.7249	-6.52	1	73	4.7e-008	1	U	R.TNAENEFVTIKK.D 2380 2382
	2384	465.2485	1392.7236	1392.7249	-0.92	1	(67)	1.9e-007	1	U	R.TNAENEFVTIKK.D 2383
	2387	465.5754	1393.7043	1393.7089	-3.28	1	(31)	0.0008	1	U	R.TNAENEFVTIKK.D
	2388	465.5772	1393.7098	1393.7089	0.66	1	(10)	0.11	1	U	R.TNAENEFVTIKK.D
	2390	697.8672	1393.7198	1393.7089	7.85	1	(7)	0.18	1	U	R.TNAENEFVTIKK.D
	2400	699.3599	1396.7052	1396.6987	4.66	0	14	0.036	1	U	K.TLNNQFASFIDK.V
	2486	711.3743	1420.7341	1420.7310	2.17	1	17	0.019	1	U	K.RTNAENEFVTIK.K
	2662	738.3956	1474.7767	1474.7780	-0.87	0	55	2.8e-006	1		R.FLEQQNQVLQTK.W 2659 2660 2661 2663 2664 2666
	2678	738.8893	1475.7640	1475.7620	1.37	0	(18)	0.016	1		R.FLEQQNQVLQTK.W
22.	F7AUX9 Mass: 25999 Score: 708 Matches: 18(17) Sequences: 6(6) emPAI: 1.63
	Pulmonary surfactant-associated protein A OS=Equus caballus OX=9796 GN=SFTPA1 PE=4 SV=1
	Query	Observed	Mr(expt)	Mr(calc)	ppm	Miss	Score	Expect	Rank	Unique	Peptide
	2560	723.4034	1444.7922	1444.7773	10.3	0	55	3.1e-006	1	U	K.SLEENAAIASLVTK.H 2559
	3246	834.4122	1666.8098	1666.8315	-13.03	0	89	1.2e-009	1	U	K.VFSTNGQVVDFDAIR.E 3247 3248
	3256	834.9044	1667.7942	1667.8155	-12.81	0	(30)	0.001	1	U	K.VFSTNGQVVDFDAIR.E 3255 3262
	3275	837.3358	1672.6571	1672.6610	-2.34	0	39	0.00013	1	U	K.CVEMYTDGQWNDR.S 3274
	3955	644.2737	1929.7994	1929.7985	0.45	1	30	0.0011	1	U	K.EKCVEMYTDGQWNDR.S
	4688	764.7584	2291.2534	2291.2671	-5.97	0	101	8.4e-011	1	U	R.HQILQLMGALSLQGSVLAVGEK.V 4686 4687 4691
	4689	1146.6346	2291.2547	2291.2671	-5.40	0	(74)	3.7e-008	1	U	R.HQILQLMGALSLQGSVLAVGEK.V 4690
	4728	768.3762	2302.1068	2302.1230	-7.01	0	97	1.9e-010	1	U	R.GPPGPPAYPDEELQTTLHDIR.H
23.	F6SP11 Mass: 10973 Score: 660 Matches: 11(11) Sequences: 4(4) emPAI: 5.76
	Uncharacterized protein OS=Equus caballus OX=9796 PE=4 SV=1
	Query	Observed	Mr(expt)	Mr(calc)	ppm	Miss	Score	Expect	Rank	Unique	Peptide
	2729	746.3449	1490.6753	1490.6784	-2.08	0	17	0.019	1	U	K.SSSSVSCQVTHQGK.T
	3300	562.6433	1684.9081	1684.9108	-1.60	0	(131)	8.8e-014	1	U	K.VNGAAISQGVQTTKPSK.Q 3299
	3303	843.4630	1684.9114	1684.9108	0.33	0	134	4.4e-014	1	U	K.VNGAAISQGVQTTKPSK.Q 3302
	3305	562.9724	1685.8952	1685.8948	0.25	0	(48)	1.5e-005	1	U	K.VNGAAISQGVQTTKPSK.Q 3307
	3308	843.9577	1685.9009	1685.8948	3.59	0	(38)	0.00015	1	U	K.VNGAAISQGVQTTKPSK.Q 3306
	3359	850.4173	1698.8200	1698.8617	-24.52	0	84	3.6e-009	1	U	K.YAASSYLTLTPAQWK.S
	4551	1113.0536	2224.0926	2224.1086	-7.18	0	71	7.6e-008	1		K.ATVVCLISDFSPSDLTVSWK.V
24.	H9GZV1 Mass: 35602 Score: 649 Matches: 14(12) Sequences: 3(3) emPAI: 0.56
	Uncharacterized protein OS=Equus caballus OX=9796 PE=4 SV=1
	Query	Observed	Mr(expt)	Mr(calc)	ppm	Miss	Score	Expect	Rank	Unique	Peptide
	2126	445.8685	1334.5837	1334.5925	-6.61	0	(18)	0.015	1	U	K.CEVQHYTSPSK.S 2125
	2127	668.2996	1334.5847	1334.5925	-5.85	0	41	7.7e-005	1	U	K.CEVQHYTSPSK.S 2128
	3366	851.4559	1700.8972	1700.9097	-7.38	0	70	1e-007	1	U	R.EPGQSVPTFAVTSLLR.V 3364
	4793	1168.0514	2334.0882	2334.0984	-4.37	0	(11)	0.08	1	U	R.LSGKPTHVNVSVVMAEADGTCY.- 4787
	4795	779.0380	2334.0921	2334.0984	-2.73	0	(100)	9.2e-011	1	U	R.LSGKPTHVNVSVVMAEADGTCY.- 4784 4785 4797
	4820	784.3661	2350.0766	2350.0934	-7.12	0	116	2.4e-012	1	U	R.LSGKPTHVNVSVVMAEADGTCY.- 4821
25.	F6PJX6 Mass: 35615 Score: 622 Matches: 24(20) Sequences: 8(6) emPAI: 1.23
	Keratin 13 OS=Equus caballus OX=9796 GN=KRT13 PE=3 SV=1
	Query	Observed	Mr(expt)	Mr(calc)	ppm	Miss	Score	Expect	Rank	Unique	Peptide
	554	404.2003	806.3861	806.3923	-7.66	0	25	0.0035	1		R.LAADDFR.L 556 557
	565	405.2231	808.4316	808.4330	-1.77	0	4	0.37	1		R.LASYLDK.V
	1153	532.8029	1063.5913	1063.6026	-10.61	1	11	0.084	1		R.LASYLDKVR.A
	1347	561.7969	1121.5792	1121.5717	6.73	0	33	0.00046	1		R.LEQEIATYR.S 1344 1346
	1618	601.3088	1200.6031	1200.6098	-5.60	0	56	2.4e-006	1		R.QSVEADINGLR.R 1617
	1624	601.8014	1201.5882	1201.5939	-4.68	0	(12)	0.066	1		R.QSVEADINGLR.R
	1989	651.3326	1300.6506	1300.6510	-0.31	0	59	1.1e-006	1	U	R.ALEEANADLEVK.I 1986 1987 1988
	2229	453.2402	1356.6987	1356.7110	-9.04	1	(26)	0.0023	1		R.QSVEADINGLRR.V
	2230	679.3571	1356.6997	1356.7110	-8.31	1	42	6.1e-005	1		R.QSVEADINGLRR.V 2232
	2244	453.5678	1357.6815	1357.6950	-9.91	1	(23)	0.0047	1		R.QSVEADINGLRR.V
	2245	679.8504	1357.6863	1357.6950	-6.41	1	(34)	0.00039	1		R.QSVEADINGLRR.V
	2328	690.3672	1378.7198	1378.7204	-0.45	1	82	5.7e-009	1		K.TRLEQEIATYR.S 2324 2327 2329
26.	F7DJE3 Mass: 38252 Score: 585 Matches: 9(9) Sequences: 5(5) emPAI: 0.51
	Surfactant protein D OS=Equus caballus OX=9796 GN=SFTPD PE=4 SV=1
	Query	Observed	Mr(expt)	Mr(calc)	ppm	Miss	Score	Expect	Rank	Unique	Peptide
	2706	742.8598	1483.7051	1483.7228	-11.99	0	91	8.5e-010	1	U	K.IAFLSMTDATTEGK.F 2707
	2956	791.9028	1581.7910	1581.7787	7.76	0	64	3.9e-007	1	U	R.QVQQLQDAFSQYK.K 2955
	3649	907.9874	1813.9603	1813.9170	23.9	0	106	2.7e-011	1	U	R.SAAENEALQQLVTAQNK.I 3648
	4428	1082.5017	2162.9889	2163.0015	-5.83	0	137	2e-014	1	U	K.SFEEAQQVCTQAGGQLASPR.S 4427
	4701	1149.0262	2296.0379	2296.0320	2.58	0	15	0.034	1	U	R.TVTNACTLVMCSPMESGLPGR.D
27.	F7CAC5 Mass: 12224 Score: 570 Matches: 17(17) Sequences: 5(5) emPAI: 3.42
	Uncharacterized protein OS=Equus caballus OX=9796 PE=4 SV=1
	Query	Observed	Mr(expt)	Mr(calc)	ppm	Miss	Score	Expect	Rank	Unique	Peptide
	1061	516.2617	1030.5089	1030.5083	0.54	0	44	4e-005	1		K.YAASSYLTR.T 1057 1058 1059 1060 1062 1063
	1425	572.7655	1143.5165	1143.5230	-5.75	0	35	0.0003	1		K.SYSSVSCQVK.H
	2675	738.8712	1475.7279	1475.7216	4.23	0	77	2e-008	1	U	K.VNDAVTTDGVQTTR.S 2671 2672 2673 2674 2677
	2682	739.3613	1476.7080	1476.7056	1.58	0	(21)	0.0083	1	U	K.VNDAVTTDGVQTTR.S
	2873	773.8813	1545.7480	1545.7423	3.71	1	23	0.0052	1		K.QSNGKYAASSYLTR.T
	4544	1111.0752	2220.1358	2220.1501	-6.40	0	93	5.2e-010	1		K.ATVVCLISDFSPSGLEVIWK.V
28.	F6W7V0 Mass: 62397 Score: 549 Matches: 28(24) Sequences: 16(14) emPAI: 1.05
	Keratin 5 OS=Equus caballus OX=9796 GN=KRT5 PE=3 SV=1
	Query	Observed	Mr(expt)	Mr(calc)	ppm	Miss	Score	Expect	Rank	Unique	Peptide
	604	414.2173	826.4200	826.4225	-3.00	0	12	0.063	1		K.FASFIDK.V
	851	469.7480	937.4815	937.4869	-5.69	0	27	0.0021	1		R.SLYNLGGSK.R 850 852
	1126	529.3022	1056.5898	1056.5927	-2.75	1	4	0.41	1	U	R.LRAEIDNVK.K
	1206	541.8015	1081.5885	1081.5920	-3.28	1	17	0.019	1		K.FASFIDKVR.F
	1234	547.2671	1092.5196	1092.5199	-0.29	0	25	0.0034	1	U	K.AQYEEIANR.S 1235
	1454	578.2715	1154.5285	1154.5277	0.69	0	31	0.00077	1		R.EYQELMNTK.L 1453
	1596	597.7927	1193.5708	1193.5676	2.63	0	24	0.0037	1	U	K.YEELQQTAGR.H 1595
	1748	621.7900	1241.5655	1241.5564	7.34	0	53	4.9e-006	1	U	R.TEAESWYQTK.Y 1747
	1830	632.3470	1262.6794	1262.6870	-6.03	0	36	0.00028	1		K.LALDVEIATYR.K 1829 1831
	1917	641.8183	1281.6220	1281.6275	-4.24	0	58	1.5e-006	1	U	R.TTAENEFVMLK.K
	2009	651.8554	1301.6963	1301.7078	-8.88	0	52	5.9e-006	1		R.SLDLDSIIAEVK.A 2005 2013 2014
	2400	699.3599	1396.7052	1396.7350	-21.39	1	14	0.042	2		K.TLNNKFASFIDK.V
	2496	713.3585	1424.7025	1424.6680	24.2	0	66	2.3e-007	1	U	K.VDALMDEINFMK.M
	2710	743.3550	1484.6955	1484.6895	4.03	1	30	0.00096	1	U	R.SRTEAESWYQTK.Y 2709
	3334	848.4156	1694.8166	1694.8185	-1.11	1	30	0.00097	1		K.DVDAAYMNKVELEAK.V
	3864	945.9777	1889.9409	1889.9635	-11.97	0	69	1.4e-007	1		R.QNLEPLFEQYINNLR.R
29.	F6V1T9 Mass: 81784 Score: 526 Matches: 20(16) Sequences: 13(12) emPAI: 0.67
	Junction plakoglobin OS=Equus caballus OX=9796 GN=JUP PE=4 SV=1
	Query	Observed	Mr(expt)	Mr(calc)	ppm	Miss	Score	Expect	Rank	Unique	Peptide
	960	499.7932	997.5718	997.5808	-9.03	0	16	0.023	1	U	R.LAEPSQLLK.S
	979	501.7760	1001.5375	1001.5393	-1.85	0	7	0.2	1	U	K.QEGLESVLK.I 982
	1218	544.3265	1086.6384	1086.6437	-4.88	0	22	0.0064	1	U	R.LNYGIPAIVK.L 1217
	1730	618.8434	1235.6723	1235.6761	-3.08	0	47	1.8e-005	1	U	R.VSVELTNSLFK.H
	2158	671.3688	1340.7230	1340.7188	3.17	0	60	1e-006	1	U	K.LLNDEDPVVVTK.A 2156
	2207	676.8101	1351.6057	1351.6038	1.40	0	51	8.5e-006	1	U	R.TMQNTSDLDTAR.C 2206
	2447	706.3978	1410.7810	1410.8017	-14.68	0	36	0.00027	1	U	R.ALMGSPQLVAAVVR.T 2445
	2574	725.3974	1448.7802	1448.8140	-23.27	0	26	0.0023	1	U	K.LLNQPNQWPLVK.A 2575
	3002	800.3920	1598.7695	1598.7801	-6.65	0	78	1.6e-008	1	U	R.HVAAGTQQPYTDGVR.M
	3003	533.9305	1598.7696	1598.7801	-6.58	0	(22)	0.0061	1	U	R.HVAAGTQQPYTDGVR.M
	3683	610.9985	1829.9738	1829.9734	0.19	1	81	8.6e-009	1	U	R.NLSDVATKQEGLESVLK.I
	3977	645.7108	1934.1104	1934.0949	8.03	0	98	1.5e-010	1	U	K.TLVTQNSGVEALIHAILR.A
	4175	677.0108	2028.0106	2028.0276	-8.39	0	46	2.4e-005	1	U	K.SAIVHLINYQDDAELATR.A
	4807	1174.1455	2346.2765	2346.2947	-7.78	0	23	0.0051	1	U	R.LNTIPLFVQLLYSSVENIQR.V
30.	A0A0B4J1C4 Mass: 17841 Score: 523 Matches: 20(16) Sequences: 8(8) emPAI: 4.64
	Joining chain of multimeric IgA and IgM OS=Equus caballus OX=9796 GN=JCHAIN PE=4 SV=1
	Query	Observed	Mr(expt)	Mr(calc)	ppm	Miss	Score	Expect	Rank	Unique	Peptide
	783	456.2829	910.5512	910.5600	-9.66	0	(28)	0.0017	1	U	R.IIIPVNSR.E 784
	785	456.7777	911.5408	911.5440	-3.49	0	32	0.0007	1	U	R.IIIPVNSR.E
	1147	532.2925	1062.5705	1062.5710	-0.41	0	47	2.2e-005	1	U	R.VPLTYGGQTK.I 1148
	1914	427.8803	1280.6191	1280.6223	-2.53	0	(10)	0.1	1	U	K.FVYHLSDLCK.K 1913 1915
	1916	641.3185	1280.6225	1280.6223	0.15	0	22	0.0064	1	U	K.FVYHLSDLCK.K 1912
	2437	470.5765	1408.7077	1408.7173	-6.82	1	23	0.0056	1	U	K.FVYHLSDLCKK.C 2436
	2778	504.2595	1509.7566	1509.7650	-5.58	1	50	9.4e-006	1	U	R.TKFVYHLSDLCK.K
	3456	868.4408	1734.8670	1734.8788	-6.77	0	93	5e-010	1	U	R.IIPSPENPNEDILER.H 3457 3458
	3505	879.4269	1756.8392	1756.8567	-9.93	1	53	5.5e-006	1	U	K.CYTNRVPLTYGGQTK.I
	3506	586.6230	1756.8473	1756.8567	-5.32	1	(39)	0.00014	1	U	K.CYTNRVPLTYGGQTK.I
	3510	586.9506	1757.8300	1757.8407	-6.05	1	(4)	0.36	1	U	K.CYTNRVPLTYGGQTK.I
	6277	1341.8781	4022.6123	4022.7092	-24.08	1	74	4.1e-008	1	U	K.KCDPVEVELDNQVVTASQSNICDEESETCYAYDR.N
31.	F6TIR2 Mass: 23133 Score: 518 Matches: 18(16) Sequences: 10(10) emPAI: 3.44
	Lipocalin 2 OS=Equus caballus OX=9796 GN=LCN2 PE=3 SV=1
	Query	Observed	Mr(expt)	Mr(calc)	ppm	Miss	Score	Expect	Rank	Unique	Peptide
	857	472.2628	942.5111	942.5175	-6.78	0	19	0.014	1	U	R.VPLQPDFK.D
	904	485.2707	968.5268	968.5331	-6.53	1	14	0.043	1	U	R.EKFISFAK.S
	1212	543.8109	1085.6072	1085.6080	-0.82	1	31	0.00079	1	U	R.TKELTPELR.E 1211
	1716	616.3262	1230.6378	1230.6397	-1.56	0	50	9.7e-006	1	U	R.YFGVQSYIVR.V 1717
	1752	415.1818	1242.5235	1242.5200	2.78	0	(11)	0.072	1	U	R.DQNCDHWIR.T
	1753	622.2717	1242.5289	1242.5200	7.16	0	43	5.1e-005	1	U	R.DQNCDHWIR.T 1751
	3513	881.4411	1760.8676	1760.8734	-3.25	1	(15)	0.032	1	U	R.VPLQPDFKDDQFQGK.W
	3514	587.9633	1760.8681	1760.8734	-2.98	1	77	1.8e-008	1	U	R.VPLQPDFKDDQFQGK.W
	3619	903.4543	1804.8941	1804.8784	8.69	0	90	1.1e-009	1	U	R.VADTDYNQFAIVFFR.K
	4144	669.0151	2004.0236	2004.0429	-9.63	1	80	9.9e-009	1	U	R.TFIPSSQPGQFNLGDIKR.Y 4143 4145
	4275	699.6577	2095.9513	2095.9772	-12.35	1	30	0.001	1	U	K.KEEQGQFTMYTTTYELK.E
	4276	1048.9839	2095.9532	2095.9772	-11.44	1	(13)	0.053	1	U	K.KEEQGQFTMYTTTYELK.E
	5158	1263.5989	2525.1832	2525.1996	-6.49	0	26	0.0023	1	U	K.SLGLTDDHIIFPVPIDQCIDEE.-
32.	F6ZV64 Mass: 278556 Score: 510 Matches: 33(24) Sequences: 27(20) emPAI: 0.26
	Desmoplakin OS=Equus caballus OX=9796 GN=DSP PE=4 SV=1
	Query	Observed	Mr(expt)	Mr(calc)	ppm	Miss	Score	Expect	Rank	Unique	Peptide
	820	462.7397	923.4648	923.4786	-15.00	0	8	0.16	1	U	K.LGIYEAMK.I 821
	822	462.7481	923.4817	923.4825	-0.89	0	15	0.035	1	U	R.DVLDGHLR.E
	868	474.7526	947.4906	947.4964	-6.05	0	20	0.011	1	U	R.LPVEEAYK.E
	988	503.2688	1004.5230	1004.5291	-6.01	0	9	0.11	1	U	K.FLDQNLQK.Y
	1034	513.7375	1025.4605	1025.4600	0.50	0	16	0.024	1	U	K.FGDSNTVMR.F
	1368	565.3080	1128.6014	1128.6026	-1.06	0	24	0.0036	1	U	K.IEVLEEELR.L
	1393	570.2770	1138.5394	1138.5394	0.05	0	33	0.00056	1	U	R.LTYEIEDEK.R
	1401	570.3371	1138.6596	1138.6597	-0.09	0	26	0.0027	1	U	R.AELIVQPELK.Y 1400
	1469	579.8115	1157.6084	1157.6227	-12.33	0	28	0.0016	1	U	R.LLQLQEQMR.A
	1491	583.2948	1164.5750	1164.5775	-2.10	0	27	0.002	1	U	K.IQSQFTDAQK.H 1490
	1588	596.8091	1191.6036	1191.6135	-8.31	1	4	0.4	1	U	R.LKAEFQEEAK.R
	1802	627.7950	1253.5754	1253.5928	-13.90	0	21	0.0081	1	U	K.AITGFDDPFSGK.T
	1859	636.3536	1270.6927	1270.6993	-5.20	0	40	9.8e-005	1	U	R.QLQNIIQATSR.E
	1961	432.5533	1294.6382	1294.6405	-1.74	1	9	0.12	1	U	R.LTYEIEDEKR.R
	1968	649.8246	1297.6346	1297.6336	0.79	0	41	7.9e-005	1	U	K.EHLMLEEELR.N
	2138	669.3428	1336.6710	1336.6510	14.9	0	36	0.00025	1	U	R.NNYDEEIISLK.N 2139
	2212	676.8531	1351.6916	1351.6983	-4.94	1	40	9.4e-005	1	U	R.NKYETEINITK.T
	2427	703.8113	1405.6080	1405.6044	2.55	0	50	1.1e-005	1	U	R.NHYNEEMSNLR.N
	2456	707.8551	1413.6957	1413.7001	-3.12	0	13	0.05	1	U	K.QQIQNDLNQWK.T 2455
	2536	717.8629	1433.7113	1433.7224	-7.78	0	8	0.15	2	U	K.QETWMLIELQK.I
	2781	756.9186	1511.8226	1511.8307	-5.38	0	61	8.1e-007	1	U	R.TLELQGLINDLQR.E
	2967	793.9383	1585.8620	1585.8749	-8.11	0	53	5.6e-006	1	U	R.ALLQAILQTEDMLK.V
	3724	921.4542	1840.8939	1840.9094	-8.42	0	43	4.5e-005	1	U	K.SAIYQLEEEYENLLK.A
	4895	1193.5377	2385.0609	2385.0801	-8.04	0	41	8.9e-005	1	U	K.ENAAYFQFFEEAQSTEAYLK.G
	4993	811.7389	2432.1948	2432.1972	-0.96	0	60	1e-006	1	U	K.AQQIHSQTSQQYPLYDLDLGK.F 4992
	5252	865.7464	2594.2174	2594.2006	6.47	0	7	0.2	1	U	R.AEMDMVAWGVDLASVEQHINSHR.S
	5796	1040.9100	3119.7083	3119.7343	-8.33	0	25	0.0035	1	U	K.IGLVRPGTALELLEAQAATGFIVDPVSNLR.L
33.	F6SHJ8 Mass: 61290 Score: 474 Matches: 22(19) Sequences: 9(7) emPAI: 0.60
	Uncharacterized protein OS=Equus caballus OX=9796 PE=3 SV=1
	Query	Observed	Mr(expt)	Mr(calc)	ppm	Miss	Score	Expect	Rank	Unique	Peptide
	604	414.2173	826.4200	826.4225	-3.00	0	12	0.063	1		K.FASFIDK.V
	1206	541.8015	1081.5885	1081.5920	-3.28	1	17	0.019	1		K.FASFIDKVR.F
	1392	570.2759	1138.5373	1138.5328	3.94	0	14	0.04	1		R.DYQELMNVK.L 1391
	1644	604.8094	1207.6042	1207.6085	-3.51	0	45	3.3e-005	1	U	R.TAAENDFVTLK.K
	1830	632.3470	1262.6794	1262.6870	-6.03	0	36	0.00028	1		K.LALDVEIATYR.K 1829 1831
	2135	446.2430	1335.7070	1335.7034	2.70	1	(36)	0.00027	1	U	R.TAAENDFVTLKK.D 2133
	2136	668.8615	1335.7085	1335.7034	3.78	1	64	4.3e-007	1	U	R.TAAENDFVTLKK.D 2134
	2400	699.3599	1396.7052	1396.7350	-21.39	1	14	0.042	2		K.TLNNKFASFIDK.V
	2662	738.3956	1474.7767	1474.7780	-0.87	0	55	2.8e-006	1		R.FLEQQNQVLQTK.W 2659 2660 2661 2663 2664 2666
	2678	738.8893	1475.7640	1475.7620	1.37	0	(18)	0.016	1		R.FLEQQNQVLQTK.W
	2811	762.3926	1522.7706	1521.7861	647	1	4	0.38	1		R.LLRDYQELMNVK.L
34.	F6TJS5 Mass: 25436 Score: 463 Matches: 5(4) Sequences: 2(1) emPAI: 0.28
	Uncharacterized protein OS=Equus caballus OX=9796 PE=4 SV=1
	Query	Observed	Mr(expt)	Mr(calc)	ppm	Miss	Score	Expect	Rank	Unique	Peptide
	508	389.7254	777.4363	777.4385	-2.86	0	4	0.36	1	U	R.VEVLYR.S
	1683	1221.4891	2440.9637	2440.9649	-0.48	0	154	3.9e-016	1	U	R.GSWGTVCDDDWDTNDANVVCR.Q 5001 1684
	5003	1221.9906	2441.9667	2441.9489	7.27	0	(53)	5.3e-006	1	U	R.GSWGTVCDDDWDTNDANVVCR.Q
35.	F6S8W6 Mass: 59219 Score: 448 Matches: 20(17) Sequences: 11(8) emPAI: 0.63
	Keratin 75 OS=Equus caballus OX=9796 GN=KRT75 PE=3 SV=1
	Query	Observed	Mr(expt)	Mr(calc)	ppm	Miss	Score	Expect	Rank	Unique	Peptide
	604	414.2173	826.4200	826.4225	-3.00	0	12	0.063	1		K.FASFIDK.V
	1206	541.8015	1081.5885	1081.5920	-3.28	1	17	0.019	1		K.FASFIDKVR.F
	1445	577.2764	1152.5382	1152.5485	-8.93	0	8	0.15	1		R.EYQELMNVK.L
	1660	606.7801	1211.5456	1211.5458	-0.17	0	54	4.4e-006	1		R.AEAESWYQTK.Y 1661 1662
	1830	632.3470	1262.6794	1262.6870	-6.03	0	36	0.00028	1		K.LALDVEIATYR.K 1829 1831
	2009	651.8554	1301.6963	1301.7078	-8.88	0	52	5.9e-006	1		R.SLDLDSIIAEVK.A 2005 2013 2014
	2400	699.3599	1396.7052	1396.7350	-21.39	1	14	0.042	2		K.TLNNKFASFIDK.V
	2593	485.9001	1454.6785	1454.6790	-0.31	1	(22)	0.0067	1		R.SRAEAESWYQTK.Y
	2596	728.3487	1454.6828	1454.6790	2.66	1	44	4.1e-005	1		R.SRAEAESWYQTK.Y 2594
	2678	738.8893	1475.7640	1475.7984	-23.28	1	5	0.3	8		R.FLEQQNKVLETK.W
	2882	775.8740	1549.7334	1549.7406	-4.67	0	101	7.1e-011	1	U	R.ISDTSVVLSMDNNR.S
	3334	848.4156	1694.8166	1694.8185	-1.11	1	30	0.00097	1		K.DVDAAYMNKVELEAK.V
36.	F6V5H1 Mass: 11238 Score: 428 Matches: 11(9) Sequences: 4(4) emPAI: 7.54
	Immunoglobulin kappa constant OS=Equus caballus OX=9796 GN=IGKC PE=4 SV=1
	Query	Observed	Mr(expt)	Mr(calc)	ppm	Miss	Score	Expect	Rank	Unique	Peptide
	2860	770.3914	1538.7682	1538.7828	-9.51	0	42	6e-005	1	U	K.DNTYSLSSTLTLPK.A
	2888	777.3549	1552.6953	1552.7005	-3.38	0	(48)	1.7e-005	1	U	K.TSSFHSSLTEQDSK.D
	2889	518.5729	1552.6968	1552.7005	-2.40	0	108	1.6e-011	1	U	K.TSSFHSSLTEQDSK.D 2890
	3867	473.9588	1891.8062	1891.8159	-5.11	0	(17)	0.019	1	U	K.ADYEAHNVYACEVSHK.T
	3869	946.9139	1891.8132	1891.8159	-1.42	0	(80)	1e-008	1	U	K.ADYEAHNVYACEVSHK.T
	3871	631.6124	1891.8153	1891.8159	-0.33	0	93	4.7e-010	1	U	K.ADYEAHNVYACEVSHK.T 3868 3870
	5767	769.3704	3073.4526	3073.4728	-6.57	1	38	0.00018	1	U	K.TSSFHSSLTEQDSKDNTYSLSSTLTLPK.A
	5768	1025.4935	3073.4588	3073.4728	-4.56	1	(19)	0.012	1	U	K.TSSFHSSLTEQDSKDNTYSLSSTLTLPK.A
37.	F6QAU5 Mass: 11433 Score: 419 Matches: 19(16) Sequences: 5(5) emPAI: 5.32
	Uncharacterized protein OS=Equus caballus OX=9796 PE=4 SV=1
	Query	Observed	Mr(expt)	Mr(calc)	ppm	Miss	Score	Expect	Rank	Unique	Peptide
	1061	516.2617	1030.5089	1030.5083	0.54	0	44	4e-005	1		K.YAASSYLTR.T 1057 1058 1059 1060 1062 1063
	1425	572.7655	1143.5165	1143.5230	-5.75	0	35	0.0003	1		K.SYSSVSCQVK.H
	2873	773.8813	1545.7480	1545.7423	3.71	1	23	0.0052	1		K.QSNGKYAASSYLTR.T
	3891	634.3276	1899.9609	1899.9763	-8.08	1	(50)	1.1e-005	1	U	K.VNDAVTNDRVQTTRPSK.Q 3892
	3893	476.0001	1899.9711	1899.9763	-2.69	1	62	6.2e-007	1	U	K.VNDAVTNDRVQTTRPSK.Q 3890
	3899	476.2468	1900.9580	1900.9603	-1.22	1	(6)	0.24	1	U	K.VNDAVTNDRVQTTRPSK.Q 3897
	3900	634.6603	1900.9590	1900.9603	-0.66	1	(27)	0.0021	1	U	K.VNDAVTNDRVQTTRPSK.Q 3901 3902
	4544	1111.0752	2220.1358	2220.1501	-6.40	0	93	5.2e-010	1		K.ATVVCLISDFSPSGLEVIWK.V
38.	F6T3Y8 Mass: 40647 Score: 403 Matches: 13(12) Sequences: 11(10) emPAI: 1.37
	Actin, cytoplasmic 1 OS=Equus caballus OX=9796 GN=ACTB PE=3 SV=1
	Query	Observed	Mr(expt)	Mr(calc)	ppm	Miss	Score	Expect	Rank	Unique	Peptide
	539	398.2410	794.4674	794.4650	2.98	0	15	0.031	1		K.IIAPPER.K
	1372	566.7682	1131.5219	1131.5197	2.03	0	21	0.0088	1	U	R.GYSFTTTAER.E
	1480	581.3069	1160.5992	1160.6111	-10.22	0	14	0.039	1		K.EITALAPSTMK.I
	2787	758.8508	1515.6870	1515.6954	-5.53	0	62	5.8e-007	1	U	K.QEYDESGPSIVHR.K
	2789	506.2419	1515.7038	1515.6954	5.57	0	(49)	1.4e-005	1	U	K.QEYDESGPSIVHR.K 2788
	3171	548.9410	1643.8011	1643.7903	6.56	1	73	4.6e-008	1	U	K.QEYDESGPSIVHRK.C
	3578	895.9350	1789.8554	1789.8846	-16.30	0	47	1.9e-005	1		K.SYELPDGQVITIGNER.F
	4022	652.0275	1953.0608	1953.0571	1.87	0	66	2.7e-007	1	U	R.VAPEEHPVLLTEAPLNPK.A
	4536	1108.0201	2214.0257	2214.0627	-16.69	0	112	6.6e-012	1	U	K.DLYANTVLSGGTTMYPGIADR.M
	4802	781.7237	2342.1493	2342.1576	-3.58	1	24	0.004	1	U	R.KDLYANTVLSGGTTMYPGIADR.M
	5761	1023.8395	3068.4966	3068.4623	11.2	0	31	0.00089	1	U	R.APEALFQPSFLGMESSGIHETTFNSIMK.C
	5957	843.9069	3371.5986	3371.6319	-9.87	1	8	0.16	1	U	R.FRAPEALFQPSFLGMESSGIHETTFNSIMK.C
39.	F6ZXQ2 Mass: 43393 Score: 390 Matches: 18(15) Sequences: 9(6) emPAI: 0.55
	Uncharacterized protein OS=Equus caballus OX=9796 PE=3 SV=1
	Query	Observed	Mr(expt)	Mr(calc)	ppm	Miss	Score	Expect	Rank	Unique	Peptide
	554	404.2003	806.3861	806.3923	-7.66	0	25	0.0035	1		R.LAADDFR.T 556 557
	565	405.2231	808.4316	808.4330	-1.77	0	4	0.37	1		R.LASYLDK.V
	1049	515.3134	1028.6122	1028.5866	24.9	0	34	0.00043	1		R.VLDELTLAR.T 1048
	1153	532.8029	1063.5913	1063.6026	-10.61	1	11	0.084	1		R.LASYLDKVR.A
	1347	561.7969	1121.5792	1121.5717	6.73	0	33	0.00046	1		R.LEQEIATYR.S 1344 1346
	1557	593.3440	1184.6734	1184.6877	-12.04	1	28	0.0016	1		R.RVLDELTLAR.T
	1693	611.8295	1221.6444	1221.6353	7.41	1	34	0.00039	1		R.TKFETEQALR.L 1690
	2328	690.3672	1378.7198	1378.7204	-0.45	1	82	5.7e-009	1		K.TRLEQEIATYR.S 2324 2327 2329
	4344	708.3591	2122.0556	2122.0867	-14.68	1	4	0.43	1	U	R.TDLEMQIEGLKEELAYLK.K
40.	F7CPJ5 Mass: 21557 Score: 376 Matches: 9(8) Sequences: 5(5) emPAI: 1.38
	Uncharacterized protein OS=Equus caballus OX=9796 GN=LOC100053601 PE=3 SV=1
	Query	Observed	Mr(expt)	Mr(calc)	ppm	Miss	Score	Expect	Rank	Unique	Peptide
	970	500.2488	998.4831	998.4821	1.00	0	24	0.0036	1	U	K.YDGYNVLR.I
	2065	659.3365	1316.6585	1316.6572	1.02	0	26	0.0026	1	U	K.ENIIDLTQTDR.C 2066
	3185	549.2802	1644.8188	1644.8246	-3.55	1	81	7.7e-009	1		R.EPDVSPEIKEEFVK.I 3184
	3186	823.4174	1644.8203	1644.8246	-2.65	1	(46)	2.7e-005	1		R.EPDVSPEIKEEFVK.I
	3399	857.9263	1713.8380	1713.8614	-13.65	0	74	4.2e-008	1		K.ISGEWYSIFLASDVK.E
	5350	888.0770	2661.2091	2661.2116	-0.96	1	152	5.7e-016	1	U	K.VNGECTEFSVVADKTEEDGVYSVK.Y
	5353	888.3905	2662.1497	2662.1956	-17.26	1	(8)	0.15	1	U	K.VNGECTEFSVVADKTEEDGVYSVK.Y
41.	F6TY91 Mass: 15867 Score: 375 Matches: 15(10) Sequences: 7(7) emPAI: 3.71
	Uncharacterized protein OS=Equus caballus OX=9796 PE=4 SV=1
	Query	Observed	Mr(expt)	Mr(calc)	ppm	Miss	Score	Expect	Rank	Unique	Peptide
	826	465.7798	929.5451	929.5368	8.97	0	21	0.0078	1		R.LPLLSTMR.E 827 828
	864	473.7751	945.5357	945.5317	4.25	0	(11)	0.079	1		R.LPLLSTMR.E 862
	1737	620.3096	1238.6046	1238.6044	0.16	0	46	2.3e-005	1		K.DHDAVDILWR.L
	2695	494.2678	1479.7816	1479.7834	-1.19	1	56	2.8e-006	1		K.LKDHDAVDILWR.L 2697 2698
	3091	809.9109	1617.8073	1617.8259	-11.45	0	37	0.0002	1	U	K.VPLDMAAGFNMPLVK.S
	3811	625.3185	1872.9336	1872.9073	14.0	0	24	0.0036	1		K.SIVEMHMETEAQAIIR.V
	4067	658.0302	1971.0688	1971.0863	-8.88	0	(49)	1.4e-005	1		R.EKPAGGNPILGSLVTFLMK.Y
	4068	986.5421	1971.0696	1971.0863	-8.50	0	85	3.4e-009	1		R.EKPAGGNPILGSLVTFLMK.Y
	5009	817.8022	2450.3847	2450.3380	19.1	0	(5)	0.31	1		K.VTSANILQLQIQPSADGQELVVK.V
	5010	1226.2015	2450.3885	2450.3380	20.6	0	96	2.4e-010	1		K.VTSANILQLQIQPSADGQELVVK.V
42.	F7D7M7 Mass: 54010 Score: 348 Matches: 11(11) Sequences: 10(10) emPAI: 0.81
	Uncharacterized protein OS=Equus caballus OX=9796 PE=4 SV=1
	Query	Observed	Mr(expt)	Mr(calc)	ppm	Miss	Score	Expect	Rank	Unique	Peptide
	743	446.7612	891.5078	891.5178	-11.21	0	14	0.037	1	U	K.LYLSLQR.I
	1205	541.3207	1080.6268	1080.6179	8.25	0	31	0.00086	1	U	R.EQGLPLPSIK.G
	1409	570.8731	1139.7317	1139.7165	13.3	0	33	0.00055	1	U	R.LEALVLELLK.R
	2109	665.3804	1328.7462	1328.7551	-6.73	0	68	1.7e-007	1	U	R.LDLSLVGDLLSGK.S
	2313	459.5825	1375.7255	1375.7361	-7.64	0	40	0.0001	1	U	R.TFLPHHNELLR.E 2312
	2850	512.9590	1535.8551	1535.8572	-1.37	0	29	0.0012	1	U	R.APRPDHLAPQPLPK.L
	3599	898.4252	1794.8359	1794.8272	4.87	0	57	2e-006	1	U	K.DQLETDISDLFSEQR.I
	4419	1079.5771	2157.1397	2157.1537	-6.48	0	55	2.9e-006	1	U	K.MVCPLATTLLNSLLEDVLR.I
	4570	744.0632	2229.1677	2229.2158	-21.57	0	47	1.8e-005	1	U	R.IPVTEAAGEGVPILDHLPFVR.E
	4630	1133.6250	2265.2354	2265.2580	-9.95	0	77	1.8e-008	1	U	K.ELLVDLQDSTAAALIQLLSPR.E
43.	F6VE52 Mass: 63726 Score: 337 Matches: 18(14) Sequences: 11(8) emPAI: 0.57
	Keratin 3 OS=Equus caballus OX=9796 GN=KRT3 PE=3 SV=1
	Query	Observed	Mr(expt)	Mr(calc)	ppm	Miss	Score	Expect	Rank	Unique	Peptide
	604	414.2173	826.4200	826.4225	-3.00	0	12	0.063	1		K.FASFIDK.V
	1206	541.8015	1081.5885	1081.5920	-3.28	1	17	0.019	1		K.FASFIDKVR.F
	1352	562.2816	1122.5487	1122.5557	-6.22	0	28	0.0017	1		K.AEAEALYQTK.L
	1392	570.2759	1138.5373	1138.5328	3.94	0	14	0.04	1		R.DYQELMNVK.L 1391
	1692	611.8173	1221.6201	1221.6241	-3.28	0	53	4.9e-006	1		R.TAAENEFVTLK.K 1691
	1830	632.3470	1262.6794	1262.6870	-6.03	0	36	0.00028	1		K.LALDVEIATYR.K 1829 1831
	2197	675.8630	1349.7114	1349.7191	-5.67	1	64	4e-007	1		R.TAAENEFVTLKK.D 2194
	2198	450.9125	1349.7157	1349.7191	-2.49	1	(63)	4.8e-007	1		R.TAAENEFVTLKK.D 2196
	2400	699.3599	1396.7052	1396.7350	-21.39	1	14	0.042	2		K.TLNNKFASFIDK.V
	2678	738.8893	1475.7640	1475.7984	-23.28	1	5	0.3	8		R.FLEQQNKVLETK.W
	2811	762.3926	1522.7706	1521.7861	647	1	4	0.38	1		R.LLRDYQELMNVK.L
	3334	848.4156	1694.8166	1694.8185	-1.11	1	30	0.00097	1		K.DVDAAYMNKVELQAK.A
44.	F6WGX6 Mass: 62957 Score: 333 Matches: 16(13) Sequences: 6(4) emPAI: 0.29
	Keratin 77 OS=Equus caballus OX=9796 GN=KRT77 PE=3 SV=1
	Query	Observed	Mr(expt)	Mr(calc)	ppm	Miss	Score	Expect	Rank	Unique	Peptide
	604	414.2173	826.4200	826.4225	-3.00	0	12	0.063	1		K.FASFIDK.V
	851	469.7480	937.4815	937.4869	-5.69	0	27	0.0021	1		R.SLYNLGGSK.S 850 852
	1206	541.8015	1081.5885	1081.5920	-3.28	1	17	0.019	1		K.FASFIDKVR.F
	2202	676.3325	1350.6505	1350.6238	19.8	0	13	0.053	2	U	R.QVDFLNAEQMR.Q
	2656	738.3862	1474.7579	1474.7416	11.1	0	48	1.5e-005	1	U	K.WELLQQVDTSTR.T 2657
	2662	738.3956	1474.7767	1474.7780	-0.87	0	55	2.8e-006	1		R.FLEQQNQVLQTK.W 2659 2660 2661 2663 2664 2666
	2678	738.8893	1475.7640	1475.7620	1.37	0	(18)	0.016	1		R.FLEQQNQVLQTK.W
45.	F6Z129 Mass: 57479 Score: 282 Matches: 6(6) Sequences: 4(4) emPAI: 0.32
	Vanin 1 OS=Equus caballus OX=9796 GN=VNN1 PE=4 SV=1
	Query	Observed	Mr(expt)	Mr(calc)	ppm	Miss	Score	Expect	Rank	Unique	Peptide
	2201	676.3214	1350.6283	1350.6238	3.31	0	65	3.1e-007	1	U	K.MTGSGIYAPDSPR.A
	3747	925.9119	1849.8092	1849.8112	-1.12	0	(79)	1.2e-008	1	U	R.TTDLHTCGDSVETASTR.F
	3748	617.6118	1849.8134	1849.8112	1.18	0	91	8.6e-010	1	U	R.TTDLHTCGDSVETASTR.F 3746
	3885	633.3047	1896.8922	1896.9065	-7.51	1	40	9.7e-005	1	U	R.LYEKDQVSDASSDLTAR.A
	4197	1023.0784	2044.1422	2044.1357	3.16	0	44	3.7e-005	1	U	R.LFSLQPPSGPVLTVTLYGR.L
46.	H9GZN9 Mass: 49408 Score: 278 Matches: 11(10) Sequences: 8(7) emPAI: 0.68
	Immunoglobulin heavy constant mu OS=Equus caballus OX=9796 GN=IGHM PE=4 SV=1
	Query	Observed	Mr(expt)	Mr(calc)	ppm	Miss	Score	Expect	Rank	Unique	Peptide
	995	505.2538	1008.4931	1008.4916	1.49	0	23	0.0056	1	U	K.ESWPVTYK.V
	1236	547.2785	1092.5425	1092.5485	-5.54	0	27	0.0019	1	U	R.ESASVTCLVK.G 1237 1238
	1640	604.3047	1206.5948	1206.6067	-9.85	0	54	3.6e-006	1	U	R.LVCQATGFSPK.E
	2270	681.8820	1361.7495	1361.7456	2.87	0	50	9e-006	1	U	K.HPPSVYVLPPTR.E
	3095	811.4633	1620.9121	1620.9279	-9.79	0	4	0.36	1	U	K.IFAIPPSFAGIFLTK.S
	3192	824.4245	1646.8344	1646.8457	-6.83	0	66	2.8e-007	1	U	K.GFSPPDVFVQWLQK.G
	4268	1045.4941	2088.9737	2088.9964	-10.84	0	84	4.2e-009	1	U	R.DGKPVESGFTTEEVQPQNK.E
	4269	697.3353	2088.9842	2088.9964	-5.85	0	(39)	0.00011	1	U	R.DGKPVESGFTTEEVQPQNK.E
	5722	747.3852	2985.5117	2985.4502	20.6	0	15	0.034	1	U	K.YTASSQVLLPSGDVPLVCTVNHSNGNEK.V
47.	P05619 Mass: 42979 Score: 272 Matches: 8(8) Sequences: 7(7) emPAI: 0.68
	Leukocyte elastase inhibitor OS=Equus caballus OX=9796 GN=SERPINB1 PE=1 SV=3
	Query	Observed	Mr(expt)	Mr(calc)	ppm	Miss	Score	Expect	Rank	Unique	Peptide
	1109	523.7955	1045.5765	1045.5808	-4.08	0	29	0.0014	1	U	R.VLELPYQGK.E
	1144	531.2870	1060.5595	1060.5665	-6.60	0	30	0.0011	1	U	R.LGVQDLFNR.G 1143
	3090	809.9014	1617.7882	1617.8039	-9.69	0	54	4.2e-006	1	U	K.TYNFLADFLASTQK.M
	3632	603.6434	1807.9083	1807.9104	-1.19	1	44	4.1e-005	1	U	R.FKLEESYDLTSHLAR.L
	4094	663.6935	1988.0588	1988.0731	-7.18	0	15	0.034	1	U	R.FQSLNADINKPGAPYILK.L
	4277	1049.4786	2096.9427	2096.9473	-2.18	0	26	0.0025	1	U	K.MYGAELASVDFQQAPEDAR.K
	4554	742.6844	2225.0315	2225.0423	-4.83	1	138	1.5e-014	1	U	K.MYGAELASVDFQQAPEDARK.E
48.	F7DXM5 Mass: 46844 Score: 267 Matches: 6(6) Sequences: 6(6) emPAI: 0.50
	Uncharacterized protein OS=Equus caballus OX=9796 GN=LOC100065068 PE=3 SV=1
	Query	Observed	Mr(expt)	Mr(calc)	ppm	Miss	Score	Expect	Rank	Unique	Peptide
	453	374.2221	746.4297	746.4327	-4.04	0	24	0.0042	1		K.SPLFVGK.V
	730	444.7556	887.4966	887.4964	0.19	0	34	0.00042	1		K.AVLTIDEK.G
	2997	799.4231	1596.8316	1596.8300	1.03	0	78	1.6e-008	1		K.IAPNLADFAFSLYR.H
	4342	1061.0822	2120.1498	2120.1616	-5.60	0	79	1.2e-008	1		K.LSISGTYDLTSILPELGITK.V
	4713	767.3703	2299.0891	2299.0757	5.84	1	49	1.4e-005	1	U	K.NLYHSEAFSINFGDTEEAKK.Q
	5354	666.5599	2662.2106	2662.2187	-3.03	1	69	1.3e-007	1		K.GKWEKPFEPESTTEQDFHVDEK.T
49.	F7CG05 Mass: 99204 Score: 234 Matches: 6(6) Sequences: 6(6) emPAI: 0.22
	Ectonucleotide pyrophosphatase/phosphodiesterase 3 OS=Equus caballus OX=9796 GN=ENPP3 PE=4 SV=1
	Query	Observed	Mr(expt)	Mr(calc)	ppm	Miss	Score	Expect	Rank	Unique	Peptide
	2410	700.4066	1398.7987	1398.8122	-9.69	0	67	2.1e-007	1	U	R.ISTLLTWLDLPK.A
	2845	767.8879	1533.7612	1533.7650	-2.45	0	54	4.4e-006	1	U	K.SMEAIFLAHGPSFK.E
	3281	559.5947	1675.7624	1675.7729	-6.32	0	38	0.00016	1	U	K.VPFYEPSHEEEVSK.F
	3681	915.3774	1828.7403	1828.7390	0.74	0	55	2.9e-006	1	U	R.LESSLCSCSDDCLQR.K
	3808	936.9997	1871.9848	1871.9781	3.59	0	25	0.0033	1	U	R.AEYLQTWSPLIPNVNK.L
	4980	1212.0187	2422.0228	2422.0278	-2.06	0	61	8.7e-007	1	U	K.SVCQGESPWVQEECGTAQQSR.C
	Proteins matching the same set of peptides:
	F7CLE3 Mass: 99318 Score: 234 Matches: 6(6) Sequences: 6(6)
	Ectonucleotide pyrophosphatase/phosphodiesterase 3 OS=Equus caballus OX=9796 GN=ENPP3 PE=4 SV=1
50.	F7C450 Mass: 38243 Score: 229 Matches: 7(5) Sequences: 4(3) emPAI: 0.39
	Alpha 2-HS glycoprotein OS=Equus caballus OX=9796 GN=AHSG PE=4 SV=1
	Query	Observed	Mr(expt)	Mr(calc)	ppm	Miss	Score	Expect	Rank	Unique	Peptide
	1739	620.8146	1239.6146	1239.6248	-8.23	0	17	0.019	1	U	K.QNGQFSVSFVK.C
	1744	621.3101	1240.6057	1240.6088	-2.52	0	(10)	0.097	1	U	K.QNGQFSVSFVK.C
	3114	814.3777	1626.7409	1626.7420	-0.67	0	91	7.4e-010	1	U	R.QLTQHAVEGDCDVR.L
	3115	543.2549	1626.7428	1626.7420	0.48	0	(30)	0.00091	1	U	R.QLTQHAVEGDCDVR.L
	4127	666.6866	1997.0381	1997.0378	0.18	0	4	0.36	1	U	K.VAHPNTAAAAGPVVRPCPGR.I
	4912	599.7938	2395.1462	2395.1557	-3.96	0	76	2.7e-008	1	U	R.HAFAGVGSGESASGEAFHVEKPPK.V 4913
51.	F6VSN2 Mass: 23428 Score: 228 Matches: 7(4) Sequences: 5(4) emPAI: 0.71
	Uncharacterized protein OS=Equus caballus OX=9796 GN=LOC100053249 PE=4 SV=1
	Query	Observed	Mr(expt)	Mr(calc)	ppm	Miss	Score	Expect	Rank	Unique	Peptide
	1385	568.7914	1135.5683	1135.5696	-1.08	0	26	0.0026	1	U	K.ASCLYGQLPK.F
	1881	638.8176	1275.6206	1275.6281	-5.93	0	48	1.5e-005	1	U	R.MLLADQGQSWK.E
	3478	873.4421	1744.8697	1744.8302	22.7	0	83	5.5e-009	1	U	R.EAALVDMVNDGVEDLR.C
	4148	669.6846	2006.0319	2006.0221	4.87	1	(10)	0.096	1	U	K.AFLASPEHVNLPINGNGKQ.-
	4149	669.6852	2006.0337	2006.0221	5.79	1	(9)	0.12	1	U	K.AFLASPEHVNLPINGNGKQ.-
	4152	670.0122	2007.0148	2007.0061	4.32	1	12	0.061	1	U	K.AFLASPEHVNLPINGNGKQ.-
	4439	723.6903	2168.0491	2168.0677	-8.59	1	110	9.4e-012	1	U	K.YVTLIYTNYEAGKEDYVK.A
52.	F6PNY0 Mass: 10311 Score: 225 Matches: 2(2) Sequences: 1(1) emPAI: 0.34
	Uncharacterized protein OS=Equus caballus OX=9796 PE=4 SV=1
	Query	Observed	Mr(expt)	Mr(calc)	ppm	Miss	Score	Expect	Rank	Unique	Peptide
	3076	808.3970	1614.7794	1614.7849	-3.43	0	123	5.2e-013	1	U	R.FSSSSSGNTATLTISR.A 3075
53.	F6ZI08 Mass: 19094 Score: 224 Matches: 2(2) Sequences: 2(2) emPAI: 0.38
	Tetraspanin OS=Equus caballus OX=9796 GN=TSPAN1 PE=3 SV=1
	Query	Observed	Mr(expt)	Mr(calc)	ppm	Miss	Score	Expect	Rank	Unique	Peptide
	4273	1048.3828	2094.7511	2094.7565	-2.58	0	151	7.5e-016	1	U	K.YCCSDDASNTNCTEAEAK.K
	4547	741.9567	2222.8482	2222.8514	-1.47	1	86	2.5e-009	1	U	K.YCCSDDASNTNCTEAEAKK.K
54.	F7D7M0 Mass: 63388 Score: 217 Matches: 7(6) Sequences: 6(5) emPAI: 0.29
	Galectin 3 binding protein OS=Equus caballus OX=9796 GN=LGALS3BP PE=4 SV=1
	Query	Observed	Mr(expt)	Mr(calc)	ppm	Miss	Score	Expect	Rank	Unique	Peptide
	1328	559.3281	1116.6417	1116.6503	-7.66	1	9	0.12	1	U	R.RIDISLSSVK.C
	1498	584.2681	1166.5217	1166.5204	1.15	0	32	0.0006	1	U	R.LANGDTAYEGR.V
	2039	656.8215	1311.6285	1311.6306	-1.63	0	38	0.00015	1	U	R.ASHGEVEDLVEK.V
	2555	721.8447	1441.6748	1441.6725	1.57	0	43	4.5e-005	1	U	K.SGYVDPTIGYENK.A 2556
	2927	524.2877	1569.8411	1569.8667	-16.30	0	64	3.6e-007	1	U	K.ILQALEFHTVPFR.L
	3547	887.4093	1772.8041	1772.8152	-6.26	0	73	4.6e-008	1	U	K.LASAYGAEQLQSYCGR.L
55.	F6SK75 Mass: 111815 Score: 216 Matches: 4(4) Sequences: 3(3) emPAI: 0.09
	Desmoglein 1 OS=Equus caballus OX=9796 GN=DSG1 PE=4 SV=1
	Query	Observed	Mr(expt)	Mr(calc)	ppm	Miss	Score	Expect	Rank	Unique	Peptide
	998	505.7374	1009.4602	1009.4651	-4.82	0	40	0.00011	1	U	R.TMNNFLDR.E
	2842	767.3635	1532.7125	1532.7293	-10.97	0	69	1.2e-007	1	U	R.QEPSDSPMFIINR.N 2843
	3727	614.6539	1840.9398	1840.9465	-3.64	0	100	9.6e-011	1	U	R.ALNSMGQDLERPLELR.V
56.	Q8HZM6 Mass: 38713 Score: 211 Matches: 7(7) Sequences: 5(5) emPAI: 0.51
	Annexin A1 OS=Equus caballus OX=9796 GN=ANXA1 PE=2 SV=3
	Query	Observed	Mr(expt)	Mr(calc)	ppm	Miss	Score	Expect	Rank	Unique	Peptide
	1112	525.7455	1049.4765	1049.4699	6.31	0	15	0.033	1	U	R.SEVDMNDIK.A
	2042	657.2952	1312.5758	1312.5783	-1.93	0	33	0.0005	1	U	K.DITSDTSGDFQK.A
	3427	863.3588	1724.7030	1724.7126	-5.55	0	69	1.2e-007	1	U	R.SEDFGVNDDLADSDAR.A 3430
	3447	866.9437	1731.8729	1731.8891	-9.33	0	73	5.1e-008	1	U	K.GLGTDEDTLIEILTSR.T
	4206	685.2948	2052.8626	2052.8621	0.24	1	35	0.0003	1	U	K.GDRSEDFGVNDDLADSDAR.A 4207
57.	F6ZI51 Mass: 38574 Score: 210 Matches: 10(6) Sequences: 8(5) emPAI: 0.51
	Annexin OS=Equus caballus OX=9796 GN=ANXA2 PE=2 SV=1
	Query	Observed	Mr(expt)	Mr(calc)	ppm	Miss	Score	Expect	Rank	Unique	Peptide
	590	411.2052	820.3959	820.4000	-5.03	0	10	0.099	1	U	R.SEVDMLK.I
	1074	518.2807	1034.5468	1034.5219	24.1	0	6	0.23	1	U	K.WISIMTER.S 1073
	1210	543.7455	1085.4765	1085.4778	-1.13	0	6	0.26	1	U	K.AYTNFDAER.D
	1307	556.2837	1110.5528	1110.5458	6.34	0	28	0.0014	1	U	R.QDIAFAYQR.R
	1688	611.8000	1221.5854	1221.5877	-1.87	0	79	1.3e-008	1	U	K.TPAQYDASELK.A 1689
	1765	622.8126	1243.6107	1243.6156	-3.98	0	25	0.0032	1	U	R.TNQELQEINR.V
	2483	711.3548	1420.6950	1420.6874	5.36	0	30	0.00091	1	U	K.SLYYYIQQDTK.G
	4227	688.9886	2063.9439	2063.9760	-15.51	1	38	0.00014	1	U	R.RAEDGSVIDYELIDQDAR.D
58.	F7CT65 Mass: 21838 Score: 205 Matches: 5(4) Sequences: 3(2) emPAI: 0.53
	Uncharacterized protein OS=Equus caballus OX=9796 GN=LOC100034197 PE=3 SV=1
	Query	Observed	Mr(expt)	Mr(calc)	ppm	Miss	Score	Expect	Rank	Unique	Peptide
	648	424.2509	846.4872	846.4964	-10.79	0	9	0.14	1	U	R.VFVDVIR.A
	3185	549.2802	1644.8188	1644.8246	-3.55	1	81	7.7e-009	1		R.EPDVSPEIKEEFVK.I 3184
	3186	823.4174	1644.8203	1644.8246	-2.65	1	(46)	2.7e-005	1		R.EPDVSPEIKEEFVK.I
	3399	857.9263	1713.8380	1713.8614	-13.65	0	74	4.2e-008	1		K.ISGEWYSIFLASDVK.E
	Proteins matching the same set of peptides:
	Q95182 Mass: 21682 Score: 205 Matches: 5(4) Sequences: 3(2)
	Major allergen Equ c 1 OS=Equus caballus OX=9796 PE=1 SV=1
59.	F6RDD3 Mass: 16129 Score: 204 Matches: 7(7) Sequences: 6(6) emPAI: 2.15
	Globin A1 OS=Equus caballus OX=9796 GN=HBB PE=3 SV=1
	Query	Observed	Mr(expt)	Mr(calc)	ppm	Miss	Score	Expect	Rank	Unique	Peptide
	1361	563.7833	1125.5521	1125.5567	-4.09	0	21	0.0084	1	U	K.LHVDPENFR.L
	1836	633.4207	1264.8268	1264.8231	2.90	0	46	2.3e-005	1	U	R.LLGNVLVVVLAR.H
	2239	679.8342	1357.6538	1357.6474	4.73	0	74	4.5e-008	1	U	K.VNEEEVGGEALGR.L
	2499	713.8500	1425.6854	1425.6776	5.47	0	44	3.9e-005	1	U	K.DFTPELQASYQK.V 2498
	3617	451.2354	1800.9123	1800.9271	-8.23	0	15	0.034	1	U	K.VLHSFGEGVHHLDNLK.G
	5190	639.8086	2555.2053	2555.2227	-6.82	1	54	3.7e-006	1	U	K.GTFAALSELHCDKLHVDPENFR.L
	Proteins matching the same set of peptides:
	P02062 Mass: 15998 Score: 204 Matches: 7(7) Sequences: 6(6)
	Hemoglobin subunit beta OS=Equus caballus OX=9796 GN=HBB PE=1 SV=1
60.	F6PVG3 Mass: 54755 Score: 192 Matches: 2(2) Sequences: 2(2) emPAI: 0.12
	EGF containing fibulin extracellular matrix protein 1 OS=Equus caballus OX=9796 GN=EFEMP1 PE=4 SV=1
	Query	Observed	Mr(expt)	Mr(calc)	ppm	Miss	Score	Expect	Rank	Unique	Peptide
	6009	864.0999	3452.3703	3452.3875	-4.96	0	123	5.4e-013	1	U	R.IQCATGYEQSEHNVCQDIDECTAGTHNCR.A
	6097	903.5998	3610.3701	3610.3701	-0.00	1	83	5.3e-009	1	U	R.TCQDINECETTNECREDEMCWNYHGGFR.C
	Proteins matching the same set of peptides:
	F6T0M8 Mass: 54158 Score: 192 Matches: 2(2) Sequences: 2(2)
	EGF containing fibulin extracellular matrix protein 1 OS=Equus caballus OX=9796 GN=EFEMP1 PE=4 SV=1
61.	P01958 Mass: 15236 Score: 192 Matches: 8(7) Sequences: 4(4) emPAI: 1.74
	Hemoglobin subunit alpha OS=Equus caballus OX=9796 GN=HBA PE=1 SV=2
	Query	Observed	Mr(expt)	Mr(calc)	ppm	Miss	Score	Expect	Rank	Unique	Peptide
	1092	521.2746	1040.5346	1040.5365	-1.78	0	39	0.00014	1	U	R.MFLGFPTTK.T 1091
	1847	634.8567	1267.6988	1267.7024	-2.80	0	61	7.4e-007	1	U	K.FLSSVSTVLTSK.Y
	2784	505.9110	1514.7112	1514.7113	-0.10	0	44	3.9e-005	1	U	K.VGGHAGEYGAEALER.M 2785
	3691	611.9637	1832.8692	1832.8846	-8.39	0	(28)	0.0015	1	U	K.TYFPHFDLSHGSAQVK.A
	3692	459.2280	1832.8829	1832.8846	-0.94	0	38	0.00017	1	U	K.TYFPHFDLSHGSAQVK.A 3693
62.	F7DIB3 Mass: 44913 Score: 187 Matches: 6(6) Sequences: 4(4) emPAI: 0.43
	SEC14 like lipid binding 3 OS=Equus caballus OX=9796 GN=SEC14L3 PE=4 SV=1
	Query	Observed	Mr(expt)	Mr(calc)	ppm	Miss	Score	Expect	Rank	Unique	Peptide
	1885	639.3104	1276.6062	1276.6081	-1.54	0	47	2.1e-005	1	U	R.AGEMTEVVASQR.Y 1884
	2188	674.3327	1346.6509	1346.6579	-5.21	0	46	2.4e-005	1	U	K.TQYEHSVQISR.G
	2189	449.8919	1346.6540	1346.6579	-2.88	0	(22)	0.0067	1	U	K.TQYEHSVQISR.G
	3809	937.4523	1872.8900	1872.9047	-7.84	0	77	2.2e-008	1	U	R.WQFSSDGADIGFGVFLK.T
	5217	856.7162	2567.1267	2567.1785	-20.15	0	34	0.00038	1	U	R.YNAHMVPEDGSLTCSEAGVYVLR.F
63.	Q28372 Mass: 80777 Score: 187 Matches: 5(5) Sequences: 4(4) emPAI: 0.17
	Gelsolin OS=Equus caballus OX=9796 GN=GSN PE=1 SV=2
	Query	Observed	Mr(expt)	Mr(calc)	ppm	Miss	Score	Expect	Rank	Unique	Peptide
	1874	638.3538	1274.6931	1274.7095	-12.90	0	19	0.012	1	U	K.HVVPNEVVVQR.L
	2080	660.3515	1318.6884	1318.6881	0.27	0	64	3.7e-007	1	U	K.AGALNSNDAFVLK.T 2078
	3203	826.3858	1650.7571	1650.7584	-0.82	1	84	3.9e-009	1	U	K.DSQDEEKTEALTSAK.R
	3624	904.4487	1806.8829	1806.8788	2.27	0	35	0.00032	1	U	K.TPSAAYLWVGAGASEAEK.T
64.	P38029 Mass: 46913 Score: 176 Matches: 6(4) Sequences: 5(4) emPAI: 0.31
	Alpha-1-antiproteinase 2 OS=Equus caballus OX=9796 PE=1 SV=2
	Query	Observed	Mr(expt)	Mr(calc)	ppm	Miss	Score	Expect	Rank	Unique	Peptide
	453	374.2221	746.4297	746.4327	-4.04	0	24	0.0042	1		K.SPLFVGK.V
	730	444.7556	887.4966	887.4964	0.19	0	34	0.00042	1		K.AVLTIDEK.G
	1607	599.3204	1196.6262	1196.6401	-11.61	0	(8)	0.15	1	U	K.LQHLEDTLTK.G
	1609	399.8871	1196.6393	1196.6401	-0.63	0	10	0.11	1	U	K.LQHLEDTLTK.G
	2997	799.4231	1596.8316	1596.8300	1.03	0	78	1.6e-008	1		K.IAPNLADFAFSLYR.H
	4342	1061.0822	2120.1498	2120.1616	-5.60	0	79	1.2e-008	1		K.LSISGTYDLTSILPELGITK.V
65.	F6T3S4 Mass: 50593 Score: 176 Matches: 5(4) Sequences: 4(4) emPAI: 0.29
	Desmoplakin OS=Equus caballus OX=9796 GN=DSP PE=4 SV=1
	Query	Observed	Mr(expt)	Mr(calc)	ppm	Miss	Score	Expect	Rank	Unique	Peptide
	1312	557.3036	1112.5927	1112.6077	-13.48	0	18	0.015	1	U	R.VVIVDPETNK.E 1311
	2587	727.3409	1452.6673	1452.6732	-4.07	0	67	1.9e-007	1	U	K.TGSQYDIQDAIDK.G
	4174	1015.0110	2028.0074	2027.9840	11.5	0	96	2.6e-010	1	U	K.GFFDPNTEENLTYLQLK.E
	4457	727.0331	2178.0774	2178.0878	-4.77	1	33	0.00045	1	U	R.VVIVDPETNKEMSVQEAYK.K
66.	F6TZ61 Mass: 52300 Score: 172 Matches: 6(6) Sequences: 6(6) emPAI: 0.44
	Aldehyde dehydrogenase OS=Equus caballus OX=9796 GN=ALDH3B1 PE=3 SV=1
	Query	Observed	Mr(expt)	Mr(calc)	ppm	Miss	Score	Expect	Rank	Unique	Peptide
	859	472.7616	943.5086	943.5087	-0.11	0	23	0.0051	1		R.ATQLEGLGR.F
	1546	591.8593	1181.7040	1181.7132	-7.81	0	42	5.7e-005	1		R.LLPALQSTIAR.F
	1832	632.8625	1263.7104	1263.7187	-6.54	0	23	0.0055	1		K.HLTPVTLELGGK.N
	1909	427.5305	1279.5697	1279.5734	-2.90	0	22	0.0066	1	U	K.FSFDTFSHHR.G
	2405	699.8832	1397.7519	1397.7337	13.1	0	42	6.6e-005	1	U	K.NMEQVLAEVLPR.Y
	4187	1019.9195	2037.8244	2037.8157	4.31	0	86	2.7e-009	1	U	K.NPCYVDDNCDPETVANR.V
67.	F7CSL8 Mass: 46896 Score: 167 Matches: 5(5) Sequences: 5(5) emPAI: 0.41
	Uncharacterized protein OS=Equus caballus OX=9796 PE=3 SV=1
	Query	Observed	Mr(expt)	Mr(calc)	ppm	Miss	Score	Expect	Rank	Unique	Peptide
	453	374.2221	746.4297	746.4327	-4.04	0	24	0.0042	1		K.SPLFVGK.V
	730	444.7556	887.4966	887.4964	0.19	0	34	0.00042	1		K.AVLTIDEK.G
	927	492.3074	982.6002	982.6063	-6.18	0	14	0.037	1	U	R.ILPELGITK.V
	2997	799.4231	1596.8316	1596.8300	1.03	0	78	1.6e-008	1		K.IAPNLADFAFSLYR.H
	5354	666.5599	2662.2106	2662.2187	-3.03	1	69	1.3e-007	1		K.GKWEKPFEPESTTEQDFHVDEK.T
	Proteins matching the same set of peptides:
	F7CYP1 Mass: 46981 Score: 167 Matches: 5(5) Sequences: 5(5)
	Uncharacterized protein OS=Equus caballus OX=9796 PE=3 SV=1
68.	F6WA57 Mass: 70303 Score: 161 Matches: 9(8) Sequences: 8(7) emPAI: 0.38
	Lymphocyte cytosolic protein 1 OS=Equus caballus OX=9796 GN=LCP1 PE=4 SV=1
	Query	Observed	Mr(expt)	Mr(calc)	ppm	Miss	Score	Expect	Rank	Unique	Peptide
	1167	535.3096	1068.6046	1068.6179	-12.43	0	25	0.0033	1	U	K.LSPEELLLR.W
	1383	568.3052	1134.5958	1134.6033	-6.65	0	43	4.5e-005	1	U	R.QFVTATDVVR.G
	1440	575.7686	1149.5226	1149.5223	0.20	0	26	0.0027	1	U	R.EGESLEDLMK.L
	1725	618.2756	1234.5366	1234.5434	-5.52	0	36	0.00023	1	U	R.AECMLQQAER.L
	1933	644.3084	1286.6021	1286.6190	-13.08	0	22	0.0065	1	U	R.NWMNSLGVNPR.V
	2091	442.2264	1323.6575	1323.6670	-7.21	1	28	0.0017	1	U	K.IGNFSTDIKDSK.A
	3132	544.9280	1631.7621	1631.7638	-1.04	1	48	1.5e-005	1	U	K.TENLDDEEKLNNAK.Y 3131
	3318	845.4219	1688.8293	1688.8482	-11.17	0	9	0.13	1	U	K.FSLVGIAGQDLNEGNR.T
69.	F6QP34 Mass: 12894 Score: 153 Matches: 4(4) Sequences: 2(2) emPAI: 1.03
	WAP four-disulfide core domain 2 OS=Equus caballus OX=9796 GN=WFDC2 PE=4 SV=1
	Query	Observed	Mr(expt)	Mr(calc)	ppm	Miss	Score	Expect	Rank	Unique	Peptide
	2776	755.8077	1509.6009	1509.6075	-4.38	0	52	6.3e-006	1	U	K.ECLSDGECADNLK.C 2777
	3914	636.2585	1905.7538	1905.7590	-2.73	0	93	5.3e-010	1	U	K.CCQAGCSSVCHLPNEK.Q
	3915	953.8898	1905.7650	1905.7590	3.13	0	(19)	0.014	1	U	K.CCQAGCSSVCHLPNEK.Q
70.	F6RMD0 Mass: 85930 Score: 152 Matches: 7(7) Sequences: 6(6) emPAI: 0.25
	Uncharacterized protein OS=Equus caballus OX=9796 GN=CFB PE=3 SV=1
	Query	Observed	Mr(expt)	Mr(calc)	ppm	Miss	Score	Expect	Rank	Unique	Peptide
	2375	696.8041	1391.5936	1391.6027	-6.55	0	46	2.6e-005	1	U	R.LEDSVTYYCSR.G
	3016	801.3615	1600.7085	1600.7167	-5.12	0	33	0.00048	1	U	K.CPSGFYPYPMQVR.T
	3987	971.4103	1940.8060	1940.8509	-23.15	0	62	6.2e-007	1	U	R.FLCTGGVNPYADPNTCR.G
	4002	650.9507	1949.8302	1949.8479	-9.05	0	40	0.00011	1	U	R.CPRPQDFENGEYWPR.A
	5352	888.1122	2661.3149	2661.3367	-8.18	0	18	0.016	1	U	K.LTYGQTLRPICLPCTEGTNQALR.L 5351
	6054	1179.8417	3536.5032	3536.5144	-3.16	1	14	0.037	1	U	R.TCQENGRWDGQTAICDDGAGYCPNPGIPLGTR.K
71.	F6VJR6 Mass: 54047 Score: 149 Matches: 7(5) Sequences: 6(4) emPAI: 0.27
	Alpha-1B-glycoprotein OS=Equus caballus OX=9796 GN=A1BG PE=4 SV=1
	Query	Observed	Mr(expt)	Mr(calc)	ppm	Miss	Score	Expect	Rank	Unique	Peptide
	1315	557.8033	1113.5920	1113.5931	-0.97	0	21	0.0084	1	U	R.ALWSGAVTPGR.D
	2420	702.3536	1402.6927	1402.7027	-7.13	0	35	0.0003	1	U	K.CAAPLGGVDFQLR.R
	3822	626.6500	1876.9281	1876.9584	-16.17	0	4	0.38	1	U	R.HWADLVLSYVGPQHAGK.Y
	3976	484.5329	1934.1026	1934.1061	-1.82	0	34	0.00045	1	U	R.VQEASAQVLRPGVSLRPK.C 3975
	4201	683.6647	2047.9722	2047.9786	-3.12	0	11	0.077	1	U	R.VSFHLDALAPGDGGLYTCR.Y
	5393	900.1135	2697.3187	2697.2923	9.82	0	83	4.6e-009	1	U	R.EGDDQFLEVAEAPEDVVVTFPVHR.A
72.	F7APS1 Mass: 11059 Score: 148 Matches: 3(2) Sequences: 3(2) emPAI: 0.72
	Uncharacterized protein OS=Equus caballus OX=9796 GN=LOC100050835 PE=4 SV=1
	Query	Observed	Mr(expt)	Mr(calc)	ppm	Miss	Score	Expect	Rank	Unique	Peptide
	1978	650.8443	1299.6740	1299.6935	-15.00	0	8	0.17	1	U	R.SQVVAGTNHFIK.V
	2407	467.2366	1398.6880	1398.6892	-0.88	0	57	2.2e-006	1	U	K.VQVGDDDFVHIR.V
	4173	676.3543	2026.0411	2026.0483	-3.56	0	104	3.6e-011	1	U	K.SLPHENKPLALSSYQTNK.A
73.	A2Q0Z1 Mass: 70854 Score: 147 Matches: 4(4) Sequences: 4(4) emPAI: 0.20
	Heat shock cognate 71 kDa protein OS=Equus caballus OX=9796 GN=HSPA8 PE=2 SV=1
	Query	Observed	Mr(expt)	Mr(calc)	ppm	Miss	Score	Expect	Rank	Unique	Peptide
	1710	614.8181	1227.6216	1227.6207	0.66	0	44	3.9e-005	1	U	K.VEIIANDQGNR.T
	3195	825.3939	1648.7732	1648.7879	-8.94	0	46	2.7e-005	1	U	K.NQVAMNPTNTVFDAK.R
	3323	564.5785	1690.7136	1690.7183	-2.77	0	31	0.00086	1	U	K.STAGDTHLGGEDFDNR.M
	3573	596.6624	1786.9654	1786.9828	-9.75	1	66	2.5e-007	1	U	R.IINEPTAAAIAYGLDKK.V
	Proteins matching the same set of peptides:
	F7AUW2 Mass: 70955 Score: 147 Matches: 4(4) Sequences: 4(4)
	Heat shock cognate 71 kDa protein OS=Equus caballus OX=9796 GN=HSPA8 PE=3 SV=1
74.	F7D5X8 Mass: 64523 Score: 141 Matches: 9(7) Sequences: 6(4) emPAI: 0.22
	Keratin 4 OS=Equus caballus OX=9796 GN=KRT4 PE=3 SV=1
	Query	Observed	Mr(expt)	Mr(calc)	ppm	Miss	Score	Expect	Rank	Unique	Peptide
	604	414.2173	826.4200	826.4225	-3.00	0	12	0.063	1		K.FASFIDK.V
	1206	541.8015	1081.5885	1081.5920	-3.28	1	17	0.019	1		K.FASFIDKVR.F
	1289	554.2753	1106.5361	1106.5356	0.46	0	29	0.0012	1		R.AQYEEIAQR.S 1288
	1896	639.3615	1276.7085	1276.7027	4.55	0	51	8.5e-006	1		K.LALDIEIATYR.K 1891 1893
	2678	738.8893	1475.7640	1475.7984	-23.28	1	5	0.3	8		R.FLEQQNKVLETK.W
	3334	848.4156	1694.8166	1694.8185	-1.11	1	30	0.00097	1		K.DVDAAYMNKVELEAK.V
75.	F7CKH3 Mass: 54817 Score: 138 Matches: 6(5) Sequences: 5(5) emPAI: 0.34
	Retinal dehydrogenase 1 OS=Equus caballus OX=9796 GN=ALDH1A1 PE=3 SV=1
	Query	Observed	Mr(expt)	Mr(calc)	ppm	Miss	Score	Expect	Rank	Unique	Peptide
	1570	595.3047	1188.5948	1188.6040	-7.71	0	30	0.001	1	U	R.QAFQLGSPWR.T
	2428	703.8699	1405.7253	1405.7242	0.83	1	35	0.00034	1		K.KFPVFNPATEEK.L
	3182	549.2665	1644.7776	1644.7896	-7.30	0	39	0.00014	1		K.IFINNEWHDSVSGK.K
	3234	555.2548	1662.7425	1662.7407	1.08	1	36	0.00025	1		K.LCEVEEGDKEDVNK.A
	3235	832.3807	1662.7468	1662.7407	3.69	1	(12)	0.06	1		K.LCEVEEGDKEDVNK.A
	5343	887.4415	2659.3026	2659.3493	-17.58	1	51	8.4e-006	1	U	K.YVLGNPLTPGVSQGPQIDKEQYEK.I
76.	F6PQ46 Mass: 121873 Score: 132 Matches: 4(3) Sequences: 4(3) emPAI: 0.08
	Ceruloplasmin OS=Equus caballus OX=9796 GN=CP PE=3 SV=1
	Query	Observed	Mr(expt)	Mr(calc)	ppm	Miss	Score	Expect	Rank	Unique	Peptide
	2879	775.3681	1548.7217	1548.7268	-3.30	0	55	3.3e-006	1	U	K.TESSTVTPTSPGETR.T
	3776	620.2791	1857.8153	1857.8282	-6.90	1	78	1.8e-008	1	U	K.SNEGTYYESQYKHPR.G
	5157	842.3859	2524.1358	2524.1653	-11.68	0	26	0.0026	1	U	K.AGLQAFFQVQDCNKPSSEDDIR.G
	6172	936.9091	3743.6071	3743.6468	-10.60	1	9	0.14	1	U	K.ADDKVYPGEQYTYVMHASQEQSPGVEDANCVTR.I
77.	F6R1X9 Mass: 41992 Score: 131 Matches: 6(6) Sequences: 4(4) emPAI: 0.46
	Actin, alpha, cardiac muscle 1 OS=Equus caballus OX=9796 GN=ACTC1 PE=3 SV=1
	Query	Observed	Mr(expt)	Mr(calc)	ppm	Miss	Score	Expect	Rank	Unique	Peptide
	539	398.2410	794.4674	794.4650	2.98	0	15	0.031	1		K.IIAPPER.K
	1480	581.3069	1160.5992	1160.6111	-10.22	0	14	0.039	1		K.EITALAPSTMK.I
	3578	895.9350	1789.8554	1789.8846	-16.30	0	47	1.9e-005	1		K.SYELPDGQVITIGNER.F
	4040	654.3016	1959.8831	1959.9036	-10.49	0	58	1.6e-006	1	U	K.YPIEHGIITNWDDMEK.I 4042
	4043	980.9534	1959.8923	1959.9036	-5.78	0	(19)	0.013	1	U	K.YPIEHGIITNWDDMEK.I
	Proteins matching the same set of peptides:
	F6Z8K0 Mass: 41850 Score: 131 Matches: 6(6) Sequences: 4(4)
	Actin, gamma 2, smooth muscle, enteric OS=Equus caballus OX=9796 GN=ACTG2 PE=3 SV=1
	F7CW82 Mass: 41982 Score: 131 Matches: 6(6) Sequences: 4(4)
	Actin, alpha 2, smooth muscle, aorta OS=Equus caballus OX=9796 GN=ACTA2 PE=3 SV=1
	F7CZ92 Mass: 42024 Score: 131 Matches: 6(6) Sequences: 4(4)
	Actin, alpha skeletal muscle OS=Equus caballus OX=9796 GN=ACTA1 PE=2 SV=1
78.	F7DYC4 Mass: 40800 Score: 129 Matches: 3(3) Sequences: 2(2) emPAI: 0.17
	Uncharacterized protein OS=Equus caballus OX=9796 GN=SFTPB PE=4 SV=1
	Query	Observed	Mr(expt)	Mr(calc)	ppm	Miss	Score	Expect	Rank	Unique	Peptide
	3933	959.4639	1916.9133	1916.9150	-0.87	0	89	1.2e-009	1	U	R.CSSEDGTGPALTALGSLPGK.W 3932
	4328	706.0450	2115.1133	2115.1211	-3.70	0	15	0.033	1	U	K.LERPEPGLEPEGLNPLLDK.L
79.	F6S6J4 Mass: 22120 Score: 126 Matches: 9(7) Sequences: 7(5) emPAI: 1.03
	Uncharacterized protein OS=Equus caballus OX=9796 GN=PRDX1 PE=4 SV=1
	Query	Observed	Mr(expt)	Mr(calc)	ppm	Miss	Score	Expect	Rank	Unique	Peptide
	1290	554.3008	1106.5871	1106.5972	-9.07	0	18	0.017	1	U	R.TIAQDYGVLK.A
	1484	582.7885	1163.5624	1163.5645	-1.85	0	34	0.00039	1	U	K.ATAVMPDGQFK.D
	1601	598.8132	1195.6119	1195.6237	-9.89	0	52	6.9e-006	1	U	R.LVQAFQFTDK.H 1602
	1657	606.3364	1210.6583	1210.6670	-7.18	0	26	0.0024	1	U	R.QITVNDLPVGR.S 1656
	3490	584.3222	1749.9448	1749.9447	0.03	1	11	0.079	1	U	K.KQGGLGPMNIPLVSDPK.R
	3559	593.6560	1777.9462	1777.9509	-2.64	1	22	0.0057	1	U	K.QGGLGPMNIPLVSDPKR.T
	4930	602.3029	2405.1826	2405.1798	1.15	0	12	0.058	1	U	K.HGEVCPAGWKPGSDTIKPDVQK.S
80.	F7BHV8 Mass: 47520 Score: 118 Matches: 6(4) Sequences: 6(4) emPAI: 0.31
	Tubulin beta chain OS=Equus caballus OX=9796 GN=TUBB4A PE=3 SV=1
	Query	Observed	Mr(expt)	Mr(calc)	ppm	Miss	Score	Expect	Rank	Unique	Peptide
	1090	520.2982	1038.5819	1038.5862	-4.17	0	29	0.0011	1		R.YLTVAAVFR.G
	1712	615.3054	1228.5962	1228.5910	4.18	0	41	8.8e-005	1		R.ISEQFTAMFR.R
	2079	660.3498	1318.6850	1318.6955	-7.95	0	55	3e-006	1		R.IMNTFSVVPSPK.V
	3018	801.3998	1600.7850	1600.8131	-17.53	0	3	0.47	1	U	R.AVLVDLEPGTMDSVR.S
	3329	846.4543	1690.8940	1690.8600	20.1	0	32	0.00062	1	U	R.ALTVPELTQQMFDAK.N
	5792	779.8487	3115.3657	3115.4159	-16.13	0	11	0.073	1	U	-.FWEVISDEHGIDPTGTYHGDSDLQLER.I
81.	F6R3X8 Mass: 23567 Score: 116 Matches: 5(5) Sequences: 5(5) emPAI: 0.94
	Brain abundant membrane attached signal protein 1 OS=Equus caballus OX=9796 GN=BASP1 PE=4 SV=1
	Query	Observed	Mr(expt)	Mr(calc)	ppm	Miss	Score	Expect	Rank	Unique	Peptide
	2359	694.3422	1386.6699	1385.6674	723	0	64	4.2e-007	1	U	K.ETPAATEAPSSTPK.A
	3668	609.2955	1824.8648	1824.8741	-5.11	1	24	0.0036	1	U	K.ASEAEAPAEPAPTKVDDK.S
	3671	913.9080	1825.8014	1825.8078	-3.54	0	30	0.00099	1	U	K.DGEQEQAAASGPAAGGDAPK.A
	4005	650.9667	1949.8782	1949.8814	-1.63	0	19	0.011	1	U	K.SDGAPASDSKPSSTEAAASSK.E
	4085	661.6592	1981.9557	1981.9592	-1.77	1	30	0.0009	1	U	K.EGGEPTKTEAPAAPAAQETK.S
82.	F6YV40 Mass: 35801 Score: 115 Matches: 2(2) Sequences: 2(2) emPAI: 0.19
	Glyceraldehyde-3-phosphate dehydrogenase OS=Equus caballus OX=9796 GN=GAPDH PE=3 SV=1
	Query	Observed	Mr(expt)	Mr(calc)	ppm	Miss	Score	Expect	Rank	Unique	Peptide
	3518	882.3922	1762.7698	1762.7951	-14.37	0	66	2.3e-007	1	U	K.LISWYDNEFGYSNR.V
	4535	738.3640	2212.0702	2212.1020	-14.39	0	62	6.3e-007	1	U	R.VIISAPSADAPMFVMGVNHEK.Y
83.	F7CU94 Mass: 16714 Score: 115 Matches: 2(2) Sequences: 2(2) emPAI: 0.44
	Lysozyme OS=Equus caballus OX=9796 GN=LYZ PE=2 SV=1
	Query	Observed	Mr(expt)	Mr(calc)	ppm	Miss	Score	Expect	Rank	Unique	Peptide
	2293	686.3503	1370.6860	1370.7129	-19.61	0	27	0.0019	1	U	R.GVSLPNWVCLAR.W
	4781	1167.0502	2332.0858	2332.0720	5.92	0	101	8e-011	1	U	R.ATNYNPGSQSTDYGIFQINSR.Y
84.	F7CIW5 Mass: 16135 Score: 111 Matches: 4(4) Sequences: 3(3) emPAI: 1.15
	NPC intracellular cholesterol transporter 2 OS=Equus caballus OX=9796 GN=NPC2 PE=4 SV=1
	Query	Observed	Mr(expt)	Mr(calc)	ppm	Miss	Score	Expect	Rank	Unique	Peptide
	935	495.2471	988.4797	988.5012	-21.70	0	18	0.015	1	U	K.SGISCPIQK.D
	3921	637.6310	1909.8711	1909.8775	-3.33	0	(42)	6.2e-005	1	U	K.EVNVNPCSTQPCQLHK.G
	3922	955.9431	1909.8717	1909.8775	-3.03	0	51	8.1e-006	1	U	K.EVNVNPCSTQPCQLHK.G
	4915	799.7595	2396.2567	2396.2927	-14.99	0	39	0.00014	1	U	K.AVVHGIVLGVPVPFPIPEPDGCK.S
85.	F7AEK5 Mass: 36786 Score: 110 Matches: 4(4) Sequences: 4(4) emPAI: 0.41
	Alkaline phosphatase, liver/bone/kidney OS=Equus caballus OX=9796 GN=ALPL PE=3 SV=1
	Query	Observed	Mr(expt)	Mr(calc)	ppm	Miss	Score	Expect	Rank	Unique	Peptide
	1971	650.3635	1298.7124	1298.7234	-8.50	0	50	9.8e-006	1	U	R.LDGLNLIDIWK.S
	2043	657.3766	1312.7386	1312.7139	18.8	0	14	0.039	1	U	K.DIAYQLVHNIK.D
	2536	717.8629	1433.7113	1433.7303	-13.28	0	45	3e-005	1	U	K.NPEGFFLLVEGGR.I
	2744	499.5741	1495.7004	1495.7056	-3.47	0	39	0.00012	1	U	R.HETHGGEDVAVFAK.G
86.	F6XS73 Mass: 41383 Score: 107 Matches: 4(3) Sequences: 4(3) emPAI: 0.26
	Chromosome 13 C16orf89 homolog OS=Equus caballus OX=9796 GN=C13H16orf89 PE=4 SV=1
	Query	Observed	Mr(expt)	Mr(calc)	ppm	Miss	Score	Expect	Rank	Unique	Peptide
	2100	664.3608	1326.7071	1326.7143	-5.42	0	60	9e-007	1	U	R.VLEGQLQGVQEK.W
	2266	681.3858	1360.7571	1360.7714	-10.56	0	20	0.0093	1	U	K.ATIAGFILSALER.A
	2278	455.9044	1364.6914	1364.6949	-2.57	0	52	5.7e-006	1	U	R.AVEHQQHFLTR.V
	2681	739.3605	1476.7065	1476.7402	-22.78	0	9	0.12	1	U	R.EFQPTIQPGFWK.L
87.	F7ASU6 Mass: 52781 Score: 106 Matches: 7(7) Sequences: 5(5) emPAI: 0.44
	Selenium binding protein 1 OS=Equus caballus OX=9796 GN=SELENBP1 PE=4 SV=1
	Query	Observed	Mr(expt)	Mr(calc)	ppm	Miss	Score	Expect	Rank	Unique	Peptide
	1670	607.8148	1213.6151	1213.6204	-4.35	0	30	0.00094	1	U	K.SPQYSQVIHR.L
	1671	405.5466	1213.6181	1213.6204	-1.89	0	(15)	0.031	1	U	K.SPQYSQVIHR.L
	1779	624.3295	1246.6445	1246.6558	-9.03	0	37	0.00019	1	U	R.IYVVDVGTEPR.A
	1882	426.2167	1275.6284	1275.6261	1.76	0	14	0.039	1	U	K.HLHVWDWQR.H
	2444	706.3874	1410.7602	1410.7355	17.6	0	39	0.00013	1	U	K.GGPVQVLEDQELK.S 2443
	4833	788.0510	2361.1311	2361.1536	-9.54	0	22	0.0063	1	U	R.FLHDPAASQGFVGCALSSTIQR.F
	Proteins matching the same set of peptides:
	F7CI32 Mass: 52491 Score: 106 Matches: 7(7) Sequences: 5(5)
	Selenium binding protein 1 OS=Equus caballus OX=9796 GN=SELENBP1 PE=4 SV=1
	F7DKR3 Mass: 53161 Score: 106 Matches: 7(7) Sequences: 5(5)
	Selenium binding protein 1 OS=Equus caballus OX=9796 GN=SELENBP1 PE=4 SV=1
88.	F7E0H3 Mass: 49639 Score: 105 Matches: 4(4) Sequences: 4(4) emPAI: 0.29
	Tubulin beta chain OS=Equus caballus OX=9796 GN=TUBB PE=3 SV=1
	Query	Observed	Mr(expt)	Mr(calc)	ppm	Miss	Score	Expect	Rank	Unique	Peptide
	1090	520.2982	1038.5819	1038.5862	-4.17	0	29	0.0011	1		R.YLTVAAVFR.G
	1712	615.3054	1228.5962	1228.5910	4.18	0	41	8.8e-005	1		R.ISEQFTAMFR.R
	2079	660.3498	1318.6850	1318.6955	-7.95	0	55	3e-006	1		R.IMNTFSVVPSPK.V
	2561	723.8439	1445.6733	1445.6820	-6.02	0	19	0.012	1	U	K.EVDEQMLNVQNK.N
89.	F7CVH6 Mass: 79622 Score: 105 Matches: 3(2) Sequences: 3(2) emPAI: 0.08
	Plakophilin 1 OS=Equus caballus OX=9796 GN=PKP1 PE=4 SV=1
	Query	Observed	Mr(expt)	Mr(calc)	ppm	Miss	Score	Expect	Rank	Unique	Peptide
	431	366.2043	730.3940	729.4034	1358	0	4	0.4	2	U	R.HPALHR.V
	1563	594.3191	1186.6236	1186.6306	-5.87	0	40	0.0001	1	U	R.LLQSGNSDVVR.S
	2814	762.8937	1523.7728	1523.7804	-5.00	0	78	1.6e-008	1	U	R.SPNQNVQQAAAGALR.N
90.	F6UAQ8 Mass: 17367 Score: 103 Matches: 7(5) Sequences: 6(4) emPAI: 1.04
	Ferritin OS=Equus caballus OX=9796 PE=3 SV=1
	Query	Observed	Mr(expt)	Mr(calc)	ppm	Miss	Score	Expect	Rank	Unique	Peptide
	702	438.7610	875.5074	875.5116	-4.82	0	16	0.027	1	U	R.IFLQDIK.K
	1449	577.3067	1152.5989	1152.5887	8.78	0	35	0.00031	1	U	K.ELGDHVTNLR.R
	1963	648.3505	1294.6864	1294.6881	-1.32	0	39	0.00012	1	U	K.NVNESLLELHK.L 1962
	2035	437.2340	1308.6802	1308.6898	-7.36	1	3	0.48	1	U	K.ELGDHVTNLRR.M
	3181	823.3475	1644.6804	1644.7164	-21.86	0	52	6.7e-006	1	U	R.MGAPESGMAEYLFDK.H
	4720	576.3013	2301.1760	2301.1641	5.16	1	8	0.16	1	U	R.IFLQDIKKPDQDDWENGLK.A
	Proteins matching the same set of peptides:
	F6WXH5 Mass: 21639 Score: 103 Matches: 7(5) Sequences: 6(4)
	Ferritin OS=Equus caballus OX=9796 GN=LOC111767398 PE=3 SV=1
	Q8MIP0 Mass: 21255 Score: 103 Matches: 7(5) Sequences: 6(4)
	Ferritin heavy chain OS=Equus caballus OX=9796 GN=FTH1 PE=2 SV=3
91.	Q29482 Mass: 52121 Score: 95 Matches: 4(4) Sequences: 4(4) emPAI: 0.28
	Clusterin OS=Equus caballus OX=9796 GN=CLU PE=2 SV=1
	Query	Observed	Mr(expt)	Mr(calc)	ppm	Miss	Score	Expect	Rank	Unique	Peptide
	878	477.7346	953.4546	953.4528	1.91	0	17	0.02	1	U	K.FMETVAEK.A
	2830	764.8757	1527.7369	1527.7457	-5.72	0	28	0.0017	1	U	K.LYDELLQSYQEK.M
	3939	961.5342	1921.0539	1921.0197	17.8	0	23	0.005	1	U	K.LFDSYPITVTVPEVVSR.N
	4281	700.9748	2099.9025	2099.9218	-9.18	0	66	2.4e-007	1	U	R.LPDQLPMTEFSEGDNHDR.T
92.	F6VZ15 Mass: 50173 Score: 93 Matches: 10(8) Sequences: 6(5) emPAI: 0.37
	Uncharacterized protein OS=Equus caballus OX=9796 PE=3 SV=1
	Query	Observed	Mr(expt)	Mr(calc)	ppm	Miss	Score	Expect	Rank	Unique	Peptide
	554	404.2003	806.3861	806.3923	-7.66	0	25	0.0035	1		R.LAADDFR.T 556 557
	1049	515.3134	1028.6122	1028.5866	24.9	0	34	0.00043	1		R.VLDELTLAR.A 1048
	1421	572.7435	1143.4724	1143.4873	-13.03	0	24	0.0044	1		K.DAEDWFFSK.T
	1557	593.3440	1184.6734	1184.6877	-12.04	1	28	0.0016	1		R.RVLDELTLAR.A
	2546	480.2358	1437.6855	1437.6922	-4.63	1	21	0.0085	1		R.ILNEMRDQYEK.M
	2547	719.8511	1437.6876	1437.6922	-3.18	1	(13)	0.052	1		R.ILNEMRDQYEK.M
	4226	1032.5338	2063.0531	2063.0357	8.42	0	13	0.054	1	U	K.ILAATMDNASFVLQIDNAR.L
93.	F6WQJ4 Mass: 22580 Score: 88 Matches: 2(2) Sequences: 1(1) emPAI: 0.32
	Tetraspanin OS=Equus caballus OX=9796 GN=CD9 PE=3 SV=1
	Query	Observed	Mr(expt)	Mr(calc)	ppm	Miss	Score	Expect	Rank	Unique	Peptide
	3585	896.9594	1791.9042	1791.9077	-1.97	0	53	4.6e-006	1	U	K.DVLSSFTTKPCPEAIK.E
	3587	598.3114	1791.9124	1791.9077	2.62	0	(47)	1.8e-005	1	U	K.DVLSSFTTKPCPEAIK.E
94.	F7BC37 Mass: 32235 Score: 86 Matches: 1(1) Sequences: 1(1) emPAI: 0.10
	Serine protease 8 OS=Equus caballus OX=9796 GN=PRSS8 PE=3 SV=1
	Query	Observed	Mr(expt)	Mr(calc)	ppm	Miss	Score	Expect	Rank	Unique	Peptide
	3459	579.6225	1735.8457	1735.8489	-1.87	0	86	2.4e-009	1	U	K.LGANQLDSHTPEAEVR.T
95.	F6ZSQ2 Mass: 9694 Score: 84 Matches: 7(6) Sequences: 3(3) emPAI: 2.42
	Uteroglobin OS=Equus caballus OX=9796 GN=SCGB1A1 PE=4 SV=1
	Query	Observed	Mr(expt)	Mr(calc)	ppm	Miss	Score	Expect	Rank	Unique	Peptide
	732	889.4581	888.4508	887.4422	1136	0	29	0.0013	1	U	K.IVESPLCA.-
	838	466.7733	931.5321	931.5379	-6.22	0	18	0.014	1	U	K.TLVDFLPK.N 837 839 840
	2303	688.3543	1374.6941	1374.6887	3.91	1	39	0.00012	1	U	K.LMDKIVESPLCA.-
	2373	696.3531	1390.6916	1390.6836	5.76	1	(32)	0.00057	1	U	K.LMDKIVESPLCA.-
96.	A2Q0Z0 Mass: 50093 Score: 82 Matches: 2(2) Sequences: 2(2) emPAI: 0.14
	Elongation factor 1-alpha 1 OS=Equus caballus OX=9796 GN=EEF1A1 PE=2 SV=1
	Query	Observed	Mr(expt)	Mr(calc)	ppm	Miss	Score	Expect	Rank	Unique	Peptide
	1033	513.3018	1024.5890	1024.6030	-13.65	0	37	0.00019	1	U	K.IGGIGTVPVGR.V
	2047	657.8829	1313.7513	1313.7343	12.9	0	57	1.8e-006	1	U	R.EHALLAYTLGVK.Q
	Proteins matching the same set of peptides:
	F6Q4R1 Mass: 49556 Score: 82 Matches: 2(2) Sequences: 2(2)
	Elongation factor 1-alpha OS=Equus caballus OX=9796 GN=EEF1A2 PE=3 SV=1
	F6RRD0 Mass: 50072 Score: 82 Matches: 2(2) Sequences: 2(2)
	Elongation factor 1-alpha OS=Equus caballus OX=9796 PE=3 SV=1
	F6UME7 Mass: 50109 Score: 82 Matches: 2(2) Sequences: 2(2)
	Elongation factor 1-alpha OS=Equus caballus OX=9796 GN=EEF1A1 PE=3 SV=1
97.	F6V7C1 Mass: 47110 Score: 79 Matches: 4(3) Sequences: 3(2) emPAI: 0.15
	Enolase 1 OS=Equus caballus OX=9796 GN=ENO1 PE=2 SV=1
	Query	Observed	Mr(expt)	Mr(calc)	ppm	Miss	Score	Expect	Rank	Unique	Peptide
	1417	381.8732	1142.5979	1142.6084	-9.21	0	12	0.066	1	U	R.IGAEVYHNLK.N
	1910	640.8070	1279.5995	1279.5788	16.2	0	48	1.6e-005	1	U	K.LMIEMDGTENK.S
	4039	980.9457	1959.8769	1959.9174	-20.64	0	36	0.00025	1	U	K.DATNVGDEGGFAPNILENK.E 4041
98.	F6QXW2 Mass: 21325 Score: 77 Matches: 2(2) Sequences: 2(2) emPAI: 0.34
	Phosphatidylethanolamine binding protein 1 OS=Equus caballus OX=9796 GN=PEBP1 PE=4 SV=1
	Query	Observed	Mr(expt)	Mr(calc)	ppm	Miss	Score	Expect	Rank	Unique	Peptide
	229	583.2888	1164.5631	1164.5662	-2.71	0	29	0.0012	1	U	R.YAGAEIDELGK.V
	4001	975.4623	1948.9101	1948.9378	-14.21	0	61	8.2e-007	1	U	K.GNDISSGTVLSDYVGSGPPK.G
99.	F6S9R7 Mass: 36044 Score: 75 Matches: 3(2) Sequences: 3(2) emPAI: 0.19
	Annexin OS=Equus caballus OX=9796 GN=ANXA4 PE=3 SV=1
	Query	Observed	Mr(expt)	Mr(calc)	ppm	Miss	Score	Expect	Rank	Unique	Peptide
	1521	588.2925	1174.5705	1174.5830	-10.61	0	7	0.2	1	U	K.GLGTDDDTLIR.V
	2953	791.3651	1580.7155	1580.7253	-6.16	0	39	0.00013	1	U	K.AASGFNAMEDAQTLR.K
	3749	617.6346	1849.8821	1849.9057	-12.78	1	49	1.2e-005	1	U	K.DLIDDLKSELSGNFER.V
100.	F6YNH6 Mass: 37693 Score: 75 Matches: 4(3) Sequences: 3(2) emPAI: 0.29
	Cathepsin B OS=Equus caballus OX=9796 GN=CTSB PE=3 SV=1
	Query	Observed	Mr(expt)	Mr(calc)	ppm	Miss	Score	Expect	Rank	Unique	Peptide
	3010	534.2697	1599.7871	1599.7794	4.84	0	5	0.35	1	U	K.AGHNFHNVDLSYVK.R
	3270	558.2571	1671.7496	1671.7450	2.74	1	19	0.011	1	U	K.ICEPGYSPSYKEDK.H
	3803	624.6194	1870.8363	1870.8567	-10.88	0	(22)	0.0061	1	U	K.SGVYQHVAGDMMGGHAVR.I
	3804	468.7172	1870.8397	1870.8567	-9.10	0	59	1.2e-006	1	U	K.SGVYQHVAGDMMGGHAVR.I
101.	F7CYR1 Mass: 52337 Score: 73 Matches: 4(4) Sequences: 4(4) emPAI: 0.28
	Serpin family C member 1 OS=Equus caballus OX=9796 GN=SERPINC1 PE=3 SV=1
	Query	Observed	Mr(expt)	Mr(calc)	ppm	Miss	Score	Expect	Rank	Unique	Peptide
	1911	641.3071	1280.5997	1280.6037	-3.13	0	17	0.018	1	U	R.SDLYVSDAFHK.A
	2147	447.5520	1339.6341	1339.6561	-16.43	0	14	0.039	1	U	K.TSDQIHFFFAK.L
	3819	625.6238	1873.8495	1873.8653	-8.44	1	49	1.3e-005	1	U	K.ATEDEGSEQKIPEATNR.R
	3859	628.9746	1883.9020	1883.9087	-3.58	0	31	0.00075	1	U	K.EHLQDMGLVDLFNPEK.S
102.	F6W8W3 Mass: 53713 Score: 66 Matches: 9(5) Sequences: 4(2) emPAI: 0.20
	Keratin 24 OS=Equus caballus OX=9796 GN=KRT24 PE=3 SV=1
	Query	Observed	Mr(expt)	Mr(calc)	ppm	Miss	Score	Expect	Rank	Unique	Peptide
	554	404.2003	806.3861	806.3923	-7.66	0	25	0.0035	1		R.LAADDFR.L 556 557
	565	405.2231	808.4316	808.4330	-1.77	0	4	0.37	1		R.LASYLDK.V
	1153	532.8029	1063.5913	1063.6026	-10.61	1	11	0.084	1		R.LASYLDKVR.A
	1616	601.3052	1200.5958	1200.6099	-11.71	0	(26)	0.0023	1	U	R.QTVEADVNGLR.K 1617 1618
	1625	601.8022	1201.5898	1201.5939	-3.37	0	28	0.0017	1	U	R.QTVEADVNGLR.K
103.	F6TZS9 Mass: 26694 Score: 65 Matches: 2(2) Sequences: 2(2) emPAI: 0.27
	Triosephosphate isomerase OS=Equus caballus OX=9796 GN=TPI1 PE=3 SV=1
	Query	Observed	Mr(expt)	Mr(calc)	ppm	Miss	Score	Expect	Rank	Unique	Peptide
	1721	617.8052	1233.5958	1233.5949	0.70	0	47	1.8e-005	1	U	K.SNVSDAVAQSTR.I
	3021	801.9509	1601.8873	1601.8817	3.48	0	30	0.00093	1	U	K.VVLAYEPVWAIGTGK.T
104.	F7DZV9 Mass: 28093 Score: 64 Matches: 1(1) Sequences: 1(1) emPAI: 0.12
	Tyrosine 3-monooxygenase/tryptophan 5-monooxygenase activation protein beta OS=Equus caballus OX=9796 GN=YWHAB PE=3 SV=1
	Query	Observed	Mr(expt)	Mr(calc)	ppm	Miss	Score	Expect	Rank	Unique	Peptide
	2999	533.5850	1597.7332	1597.7332	0.02	0	64	3.6e-007	1	U	K.AVTEQGHELSNEER.N
105.	F7ALV0 Mass: 10785 Score: 64 Matches: 2(2) Sequences: 2(2) emPAI: 0.74
	Thioredoxin OS=Equus caballus OX=9796 GN=TXN PE=4 SV=1
	Query	Observed	Mr(expt)	Mr(calc)	ppm	Miss	Score	Expect	Rank	Unique	Peptide
	2202	676.3325	1350.6505	1350.6415	6.64	0	63	4.9e-007	1	U	-.SAFQEALNSAGEK.L
	2628	488.5940	1462.7601	1462.7642	-2.85	0	14	0.044	1	U	K.MIKPFFHSLSEK.Y
	Proteins matching the same set of peptides:
	O97508 Mass: 11729 Score: 64 Matches: 2(2) Sequences: 2(2)
	Thioredoxin OS=Equus caballus OX=9796 GN=TXN PE=3 SV=3
106.	F7DBT2 Mass: 25543 Score: 58 Matches: 3(1) Sequences: 3(1) emPAI: 0.13
	Complement C1q C chain OS=Equus caballus OX=9796 GN=C1QC PE=4 SV=1
	Query	Observed	Mr(expt)	Mr(calc)	ppm	Miss	Score	Expect	Rank	Unique	Peptide
	1184	537.7882	1073.5619	1073.5618	0.05	0	9	0.12	1	U	K.HQSVFTVTR.Q
	2535	717.8569	1433.6992	1433.7150	-11.05	0	11	0.076	1	U	R.QTDQYPAANSLVK.F
	4057	655.9858	1964.9357	1964.9229	6.53	0	58	1.7e-006	1	U	K.FNTVVTNPQGHYDTSTGK.F
107.	F6XEB4 Mass: 27728 Score: 57 Matches: 1(1) Sequences: 1(1) emPAI: 0.12
	Tyrosine 3-monooxygenase/tryptophan 5-monooxygenase activation protein zeta OS=Equus caballus OX=9796 GN=YWHAZ PE=3 SV=1
	Query	Observed	Mr(expt)	Mr(calc)	ppm	Miss	Score	Expect	Rank	Unique	Peptide
	1904	640.3322	1278.6498	1278.6456	3.28	1	57	1.9e-006	1	U	R.YLAEVAAGDDKK.G
108.	F6R810 Mass: 50072 Score: 55 Matches: 5(2) Sequences: 5(2) emPAI: 0.14
	Tubulin alpha chain OS=Equus caballus OX=9796 GN=LOC100052388 PE=3 SV=1
	Query	Observed	Mr(expt)	Mr(calc)	ppm	Miss	Score	Expect	Rank	Unique	Peptide
	2610	729.4321	1456.8497	1456.8613	-7.97	0	10	0.097	1	U	R.LIGQIVSSITASLR.F
	3416	573.6288	1717.8645	1717.8747	-5.93	0	39	0.00011	1	U	R.NLDIERPTYTNLNR.L
	3666	912.9937	1823.9728	1823.9782	-2.97	0	5	0.29	1	U	K.VGINYQPPTVVPGGDLAK.V
	4150	1004.4330	2006.8514	2006.8858	-17.14	0	8	0.15	1	U	K.TIGGGDDSFNTFFSETGAGK.H
	4970	604.5530	2414.1828	2414.1978	-6.22	1	29	0.0013	1	U	R.QLFHPEQLITGKEDAANNYAR.G
	Proteins matching the same set of peptides:
	F6YDT3 Mass: 50216 Score: 55 Matches: 5(2) Sequences: 5(2)
	Tubulin alpha chain OS=Equus caballus OX=9796 PE=3 SV=1
	F6ZSB4 Mass: 50104 Score: 55 Matches: 5(2) Sequences: 5(2)
	Tubulin alpha chain OS=Equus caballus OX=9796 GN=TUBA1A PE=3 SV=1
	F7ANC9 Mass: 50428 Score: 55 Matches: 5(2) Sequences: 5(2)
	Tubulin alpha chain OS=Equus caballus OX=9796 GN=TUBA1B PE=3 SV=1
	F7CD56 Mass: 50363 Score: 55 Matches: 5(2) Sequences: 5(2)
	Tubulin alpha chain OS=Equus caballus OX=9796 GN=LOC100065732 PE=3 SV=1
109.	F6UL68 Mass: 15852 Score: 54 Matches: 1(1) Sequences: 1(1) emPAI: 0.21
	Transthyretin OS=Equus caballus OX=9796 GN=TTR PE=3 SV=1
	Query	Observed	Mr(expt)	Mr(calc)	ppm	Miss	Score	Expect	Rank	Unique	Peptide
	2491	712.8358	1423.6571	1423.6619	-3.42	0	54	4e-006	1	U	K.AADETWELFASGK.T
110.	F7BJD8 Mass: 34259 Score: 54 Matches: 2(2) Sequences: 2(2) emPAI: 0.20
	Cathepsin H OS=Equus caballus OX=9796 GN=CTSH PE=3 SV=1
	Query	Observed	Mr(expt)	Mr(calc)	ppm	Miss	Score	Expect	Rank	Unique	Peptide
	1862	637.2879	1272.5613	1272.5696	-6.58	0	30	0.0011	1	U	K.GIMGEDTYPYK.G
	4179	678.6174	2032.8303	2032.8506	-10.02	1	37	0.00021	1	U	K.GIMGEDTYPYKGQDGDCK.F
111.	F6RGN2 Mass: 15140 Score: 53 Matches: 3(3) Sequences: 3(3) emPAI: 0.84
	Fatty acid binding protein 5 OS=Equus caballus OX=9796 GN=FABP5 PE=3 SV=1
	Query	Observed	Mr(expt)	Mr(calc)	ppm	Miss	Score	Expect	Rank	Unique	Peptide
	731	445.1914	888.3683	888.3687	-0.48	0	15	0.033	1	U	K.GFDEYMK.E
	829	466.2567	930.4988	930.4957	3.37	0	13	0.049	1	U	K.EVGVGMALR.K
	3330	847.9105	1693.8064	1693.7950	6.71	0	51	8.5e-006	1	U	K.LVVECVMNNVTCTR.V
112.	F7DB13 Mass: 17141 Score: 52 Matches: 2(2) Sequences: 1(1) emPAI: 0.43
	Uncharacterized protein OS=Equus caballus OX=9796 PE=4 SV=1
	Query	Observed	Mr(expt)	Mr(calc)	ppm	Miss	Score	Expect	Rank	Unique	Peptide
	1451	577.7911	1153.5676	1153.5669	0.63	0	35	0.00034	1	U	K.FSSFHFLNR.F
	1452	385.5300	1153.5683	1153.5669	1.20	0	(30)	0.00093	1	U	K.FSSFHFLNR.F
113.	F6T0P6 Mass: 52829 Score: 52 Matches: 2(2) Sequences: 2(2) emPAI: 0.13
	GC, vitamin D binding protein OS=Equus caballus OX=9796 GN=GC PE=4 SV=1
	Query	Observed	Mr(expt)	Mr(calc)	ppm	Miss	Score	Expect	Rank	Unique	Peptide
	4828	1177.1320	2352.2494	2352.2676	-7.74	0	24	0.0042	1	U	K.VPTADLEDVLPLAEDITTILSK.C
	4876	1191.0187	2380.0228	2380.0572	-14.44	0	41	7.5e-005	1	U	K.SYLSMVGSCCTSPSPTVCFLK.E
114.	F7BWJ9 Mass: 27288 Score: 50 Matches: 1(1) Sequences: 1(1) emPAI: 0.12
	Cysteine-rich secretory protein 3 OS=Equus caballus OX=9796 GN=CRISP3 PE=3 SV=1
	Query	Observed	Mr(expt)	Mr(calc)	ppm	Miss	Score	Expect	Rank	Unique	Peptide
	2767	753.8600	1505.7055	1505.6933	8.15	0	50	9.8e-006	1	U	K.INTPYEQGTPCAR.C
	Proteins matching the same set of peptides:
	O19010 Mass: 27290 Score: 50 Matches: 1(1) Sequences: 1(1)
	Cysteine-rich secretory protein 3 OS=Equus caballus OX=9796 GN=CRISP3 PE=1 SV=1
115.	F6QXN5 Mass: 22986 Score: 49 Matches: 2(2) Sequences: 2(2) emPAI: 0.31
	Transgelin OS=Equus caballus OX=9796 GN=TAGLN2 PE=3 SV=1
	Query	Observed	Mr(expt)	Mr(calc)	ppm	Miss	Score	Expect	Rank	Unique	Peptide
	1674	608.3406	1214.6667	1214.6805	-11.35	0	34	0.00038	1	U	R.TLMNLGGLAVAR.N
	1908	640.7918	1279.5691	1279.5681	0.79	0	28	0.0017	1	U	R.NFSDDQLQEGK.N
116.	F6PQH3 Mass: 79186 Score: 49 Matches: 1(1) Sequences: 1(1) emPAI: 0.04
	Solute carrier family 44 member 4 OS=Equus caballus OX=9796 GN=SLC44A4 PE=3 SV=1
	Query	Observed	Mr(expt)	Mr(calc)	ppm	Miss	Score	Expect	Rank	Unique	Peptide
	2872	773.3515	1544.6885	1544.6929	-2.89	0	49	1.4e-005	1	U	R.NDGSLDRPYYMSK.S
117.	F6W3M5 Mass: 58696 Score: 49 Matches: 2(2) Sequences: 2(2) emPAI: 0.12
	Pyruvate kinase OS=Equus caballus OX=9796 GN=PKM PE=3 SV=1
	Query	Observed	Mr(expt)	Mr(calc)	ppm	Miss	Score	Expect	Rank	Unique	Peptide
	1606	599.3197	1196.6249	1196.6401	-12.73	0	45	3.3e-005	1	U	R.LDIDSPPITAR.N
	3856	471.7312	1882.8956	1882.8962	-0.33	0	17	0.021	1	U	R.LNFSHGTHEYHAETIK.N
118.	F7BAA0 Mass: 27492 Score: 46 Matches: 2(2) Sequences: 2(2) emPAI: 0.26
	Glutathione S-transferase omega 1 OS=Equus caballus OX=9796 GN=GSTO1 PE=3 SV=1
	Query	Observed	Mr(expt)	Mr(calc)	ppm	Miss	Score	Expect	Rank	Unique	Peptide
	1194	540.3062	1078.5979	1078.6135	-14.45	0	28	0.0015	1	U	R.HEVININLK.N
	2251	679.8746	1357.7346	1357.7354	-0.60	0	31	0.00076	1	U	K.GSPPPGPVPEGVIR.V
119.	F7DEZ0 Mass: 21291 Score: 46 Matches: 1(1) Sequences: 1(1) emPAI: 0.16
	Solute carrier family 31 member 1 OS=Equus caballus OX=9796 GN=SLC31A1 PE=4 SV=1
	Query	Observed	Mr(expt)	Mr(calc)	ppm	Miss	Score	Expect	Rank	Unique	Peptide
	4239	691.9901	2072.9483	2072.9659	-8.50	0	46	2.4e-005	1	U	R.YNSMPVPGPNGTTLMETHK.T
120.	F6XRY7 Mass: 14569 Score: 45 Matches: 1(1) Sequences: 1(1) emPAI: 0.23
	Cystatin OS=Equus caballus OX=9796 GN=CST6 PE=3 SV=1
	Query	Observed	Mr(expt)	Mr(calc)	ppm	Miss	Score	Expect	Rank	Unique	Peptide
	4423	1082.0052	2161.9959	2161.9984	-1.12	0	45	2.9e-005	1	U	K.NTMAGDLTTCPLAVGEQQEK.L
121.	F6TEI8 Mass: 14990 Score: 45 Matches: 1(1) Sequences: 1(1) emPAI: 0.23
	Profilin OS=Equus caballus OX=9796 PE=3 SV=1
	Query	Observed	Mr(expt)	Mr(calc)	ppm	Miss	Score	Expect	Rank	Unique	Peptide
	3169	822.4589	1642.9033	1642.9294	-15.91	0	45	3.2e-005	1	U	K.TFVNITPAEVGVLVGK.G
	Proteins matching the same set of peptides:
	F6UJ33 Mass: 15034 Score: 45 Matches: 1(1) Sequences: 1(1)
	Profilin OS=Equus caballus OX=9796 GN=PFN1 PE=3 SV=1
122.	F7CR03 Mass: 54695 Score: 43 Matches: 1(1) Sequences: 1(1) emPAI: 0.06
	Phospholipid transfer protein OS=Equus caballus OX=9796 GN=PLTP PE=4 SV=1
	Query	Observed	Mr(expt)	Mr(calc)	ppm	Miss	Score	Expect	Rank	Unique	Peptide
	2099	664.3237	1326.6329	1326.6415	-6.50	0	43	4.8e-005	1	U	R.AVEPQLQEEER.M
123.	H9GZN7 Mass: 7338 Score: 43 Matches: 1(1) Sequences: 1(1) emPAI: 0.48
	Uncharacterized protein OS=Equus caballus OX=9796 PE=4 SV=1
	Query	Observed	Mr(expt)	Mr(calc)	ppm	Miss	Score	Expect	Rank	Unique	Peptide
	5966	1129.9071	3386.6995	3386.7504	-15.04	0	43	4.9e-005	1	U	K.ESGPGLVKPSQTLSLTCTVSGLSLSSNAVGWVR.Q
	Proteins matching the same set of peptides:
	H9GZN8 Mass: 10258 Score: 43 Matches: 1(1) Sequences: 1(1)
	Uncharacterized protein OS=Equus caballus OX=9796 PE=4 SV=1
124.	P02791 Mass: 19965 Score: 41 Matches: 3(2) Sequences: 2(2) emPAI: 0.37
	Ferritin light chain OS=Equus caballus OX=9796 GN=FTL PE=1 SV=4
	Query	Observed	Mr(expt)	Mr(calc)	ppm	Miss	Score	Expect	Rank	Unique	Peptide
	1550	395.5316	1183.5730	1183.5768	-3.18	0	(4)	0.42	1	U	K.MGDHLTNIQR.L
	1551	592.7947	1183.5748	1183.5768	-1.67	0	35	0.00035	1	U	K.MGDHLTNIQR.L
	2040	438.2255	1311.6546	1311.6717	-13.09	1	19	0.012	1	U	K.KMGDHLTNIQR.L
125.	F6RZ56 Mass: 25438 Score: 39 Matches: 3(3) Sequences: 3(3) emPAI: 0.45
	Uncharacterized protein OS=Equus caballus OX=9796 PE=3 SV=1
	Query	Observed	Mr(expt)	Mr(calc)	ppm	Miss	Score	Expect	Rank	Unique	Peptide
	696	436.2608	870.5071	870.5175	-11.88	0	30	0.00097	1	U	R.ISNLPTVK.K
	912	488.7870	975.5595	975.5753	-16.12	0	17	0.022	1	U	R.AILNYIAAK.Y
	987	502.8058	1003.5970	1003.6066	-9.60	1	18	0.015	1	U	K.VKEIFQLK.-
126.	F6XZQ1 Mass: 20863 Score: 38 Matches: 1(1) Sequences: 1(1) emPAI: 0.16
	Calcyphosine OS=Equus caballus OX=9796 GN=CAPS PE=4 SV=1
	Query	Observed	Mr(expt)	Mr(calc)	ppm	Miss	Score	Expect	Rank	Unique	Peptide
	929	493.7628	985.5111	985.5192	-8.26	0	38	0.00016	1	U	R.ALDAAELQR.G
127.	F6VK89 Mass: 38426 Score: 37 Matches: 1(1) Sequences: 1(1) emPAI: 0.09
	CD14 molecule OS=Equus caballus OX=9796 GN=CD14 PE=4 SV=1
	Query	Observed	Mr(expt)	Mr(calc)	ppm	Miss	Score	Expect	Rank	Unique	Peptide
	1528	588.8046	1175.5946	1175.5968	-1.93	0	37	0.00018	1	U	K.LSVLDLSCNR.L
128.	F6QME0 Mass: 25358 Score: 33 Matches: 1(1) Sequences: 1(1) emPAI: 0.13
	Uncharacterized protein OS=Equus caballus OX=9796 PE=4 SV=1
	Query	Observed	Mr(expt)	Mr(calc)	ppm	Miss	Score	Expect	Rank	Unique	Peptide
	1590	596.8115	1191.6084	1191.6322	-19.97	0	33	0.00051	1	U	K.FEVGDIMLIR.D
	Proteins matching the same set of peptides:
	F6XLG0 Mass: 32000 Score: 33 Matches: 1(1) Sequences: 1(1)
	Purine nucleoside phosphorylase OS=Equus caballus OX=9796 PE=3 SV=1
	F7AZD1 Mass: 31964 Score: 33 Matches: 1(1) Sequences: 1(1)
	Purine nucleoside phosphorylase OS=Equus caballus OX=9796 PE=3 SV=1
129.	F7BNQ2 Mass: 67403 Score: 29 Matches: 2(2) Sequences: 2(2) emPAI: 0.10
	Complement component 4 binding protein alpha OS=Equus caballus OX=9796 GN=C4BPA PE=4 SV=1
	Query	Observed	Mr(expt)	Mr(calc)	ppm	Miss	Score	Expect	Rank	Unique	Peptide
	2425	469.2527	1404.7362	1404.7296	4.73	0	18	0.016	1	U	K.ALCPKPQIEHGR.L
	4700	1148.9926	2295.9706	2295.9850	-6.30	0	24	0.0039	1	U	R.WTPYTECEEVCCPVPELK.N
130.	F6VIZ0 Mass: 227159 Score: 28 Matches: 1(1) Sequences: 1(1) emPAI: 0.01
	Uncharacterized protein OS=Equus caballus OX=9796 PE=4 SV=1
	Query	Observed	Mr(expt)	Mr(calc)	ppm	Miss	Score	Expect	Rank	Unique	Peptide
	3910	953.4234	1904.8322	1904.8662	-17.81	0	28	0.0015	1	U	R.LSCPCSWWQGLQDLR.F
131.	F6R2K0 Mass: 127839 Score: 27 Matches: 1(1) Sequences: 1(1) emPAI: 0.03
	Uncharacterized protein OS=Equus caballus OX=9796 PE=4 SV=1
	Query	Observed	Mr(expt)	Mr(calc)	ppm	Miss	Score	Expect	Rank	Unique	Peptide
	1615	601.2947	1200.5748	1200.5775	-2.22	0	27	0.0018	1	U	K.LAQAYYESTR.R
132.	F7BPT4 Mass: 69325 Score: 27 Matches: 4(1) Sequences: 4(1) emPAI: 0.05
	Ezrin OS=Equus caballus OX=9796 GN=EZR PE=4 SV=1
	Query	Observed	Mr(expt)	Mr(calc)	ppm	Miss	Score	Expect	Rank	Unique	Peptide
	1544	591.8008	1181.5870	1181.5869	0.06	0	8	0.17	1	U	K.APDFVFYAPR.L
	2648	491.5971	1471.7694	1471.7817	-8.34	1	5	0.34	1	U	R.RKPDTIEVQQMK.A
	3204	826.4061	1650.7977	1650.8100	-7.47	0	27	0.0021	1	U	K.SQEQLAAELAEYTAK.I
	4057	655.9858	1964.9357	1964.9360	-0.17	1	5	0.35	3	U	R.QLMTLTSELSQARDENK.R
133.	F7ALQ0 Mass: 104374 Score: 26 Matches: 1(1) Sequences: 1(1) emPAI: 0.03
	Transmembrane channel-like protein OS=Equus caballus OX=9796 GN=TMC5 PE=3 SV=1
	Query	Observed	Mr(expt)	Mr(calc)	ppm	Miss	Score	Expect	Rank	Unique	Peptide
	1621	601.3442	1200.6739	1200.6900	-13.39	0	26	0.0027	1	U	K.LIASLIPMTSR.D
134.	P00443 Mass: 16061 Score: 24 Matches: 2(1) Sequences: 2(1) emPAI: 0.21
	Superoxide dismutase [Cu-Zn] OS=Equus caballus OX=9796 GN=SOD1 PE=1 SV=2
	Query	Observed	Mr(expt)	Mr(calc)	ppm	Miss	Score	Expect	Rank	Unique	Peptide
	2822	764.3710	1526.7275	1525.7009	673	0	8	0.18	1	U	R.HVGDLGNVTADENGK.A
	4988	607.5619	2426.2185	2426.2343	-6.53	0	24	0.0036	1	U	K.GDGPVHGVIHFEQQQEGGPVVLK.G
135.	F6XBQ7 Mass: 35716 Score: 23 Matches: 1(1) Sequences: 1(1) emPAI: 0.09
	Uncharacterized protein OS=Equus caballus OX=9796 PE=4 SV=1
	Query	Observed	Mr(expt)	Mr(calc)	ppm	Miss	Score	Expect	Rank	Unique	Peptide
	3973	967.9181	1933.8216	1933.8265	-2.50	0	23	0.0049	1	U	R.NQNYFPAGSTVEYECR.M
	Proteins matching the same set of peptides:
	F6XGE0 Mass: 54903 Score: 23 Matches: 1(1) Sequences: 1(1)
	Uncharacterized protein OS=Equus caballus OX=9796 PE=4 SV=1
136.	F7CW51 Mass: 32556 Score: 22 Matches: 1(1) Sequences: 1(1) emPAI: 0.10
	Syndecan binding protein OS=Equus caballus OX=9796 GN=SDCBP PE=4 SV=1
	Query	Observed	Mr(expt)	Mr(calc)	ppm	Miss	Score	Expect	Rank	Unique	Peptide
	1641	604.3074	1206.6002	1206.6033	-2.61	0	22	0.0061	1	U	K.DSTGHVGFIFK.N
137.	F6VUW2 Mass: 37059 Score: 22 Matches: 1(1) Sequences: 1(1) emPAI: 0.09
	Cathepsin S OS=Equus caballus OX=9796 GN=CTSS PE=3 SV=1
	Query	Observed	Mr(expt)	Mr(calc)	ppm	Miss	Score	Expect	Rank	Unique	Peptide
	4025	978.4023	1954.7900	1954.7938	-1.93	0	22	0.0068	1	U	R.NSGNHCGIANYCSYPEI.-
138.	F6U152 Mass: 10343 Score: 20 Matches: 1(1) Sequences: 1(1) emPAI: 0.34
	Dynein light chain OS=Equus caballus OX=9796 GN=DYNLL2 PE=3 SV=1
	Query	Observed	Mr(expt)	Mr(calc)	ppm	Miss	Score	Expect	Rank	Unique	Peptide
	1923	642.7949	1283.5753	1282.5830	774	0	20	0.0097	1	U	R.NFGSYVTHETK.H
	Proteins matching the same set of peptides:
	F6W011 Mass: 10359 Score: 20 Matches: 1(1) Sequences: 1(1)
	Dynein light chain OS=Equus caballus OX=9796 GN=DYNLL1 PE=3 SV=1
139.	F6SP74 Mass: 50634 Score: 20 Matches: 2(1) Sequences: 2(1) emPAI: 0.07
	Complement factor properdin OS=Equus caballus OX=9796 GN=CFP PE=4 SV=1
	Query	Observed	Mr(expt)	Mr(calc)	ppm	Miss	Score	Expect	Rank	Unique	Peptide
	3372	568.9293	1703.7661	1703.7719	-3.41	1	9	0.12	1	U	R.CIGQGGQCSEKVEPR.T
	4299	702.6287	2104.8642	2104.8804	-7.70	0	20	0.01	1	U	R.TCDHPVPQHGGPSCAGDASR.N
140.	F6X6A6 Mass: 11267 Score: 20 Matches: 1(1) Sequences: 1(1) emPAI: 0.30
	Peptidyl-prolyl cis-trans isomerase OS=Equus caballus OX=9796 GN=PPIA PE=3 SV=1
	Query	Observed	Mr(expt)	Mr(calc)	ppm	Miss	Score	Expect	Rank	Unique	Peptide
	1899	639.7985	1277.5824	1277.5744	6.26	0	20	0.01	1	U	K.EGMNIVEAMER.F
141.	F6PRI5 Mass: 61998 Score: 20 Matches: 2(1) Sequences: 2(1) emPAI: 0.05
	Carboxylic ester hydrolase OS=Equus caballus OX=9796 GN=LOC100051065 PE=3 SV=1
	Query	Observed	Mr(expt)	Mr(calc)	ppm	Miss	Score	Expect	Rank	Unique	Peptide
	1145	532.2738	1062.5331	1062.5346	-1.43	0	5	0.33	1	U	K.YLGGTNDPVK.K
	2992	798.8989	1595.7833	1595.8137	-19.02	0	20	0.011	1	U	R.FAPPQPADPWPFVK.N
142.	F7CL15 Mass: 35975 Score: 20 Matches: 1(1) Sequences: 1(1) emPAI: 0.09
	Annexin OS=Equus caballus OX=9796 GN=ANXA5 PE=3 SV=1
	Query	Observed	Mr(expt)	Mr(calc)	ppm	Miss	Score	Expect	Rank	Unique	Peptide
	978	501.3016	1000.5887	1000.5917	-3.02	0	20	0.011	1	U	K.VLTEIIASR.T
143.	F6W039 Mass: 23409 Score: 19 Matches: 1(1) Sequences: 1(1) emPAI: 0.14
	Rho GDP dissociation inhibitor alpha OS=Equus caballus OX=9796 GN=ARHGDIA PE=4 SV=1
	Query	Observed	Mr(expt)	Mr(calc)	ppm	Miss	Score	Expect	Rank	Unique	Peptide
	3566	892.4167	1782.8188	1782.8022	9.34	0	19	0.013	1	U	R.AEEYEFLTPMEEAPK.G
144.	F7DXG8 Mass: 18491 Score: 19 Matches: 2(1) Sequences: 2(1) emPAI: 0.18
	Cofilin 1 OS=Equus caballus OX=9796 GN=CFL1 PE=3 SV=1
	Query	Observed	Mr(expt)	Mr(calc)	ppm	Miss	Score	Expect	Rank	Unique	Peptide
	1058	516.2585	1030.5024	1029.5164	958	1	4	0.39	3	U	K.SKMIYASSK.D
	3577	597.6067	1789.7982	1789.8053	-3.95	1	19	0.013	1	U	K.HELQANCYEEVKDR.C
145.	B1MV73 Mass: 85456 Score: 18 Matches: 1(1) Sequences: 1(1) emPAI: 0.04
	Beta catenin 1 OS=Equus caballus OX=9796 GN=CTNNB1 PE=2 SV=1
	Query	Observed	Mr(expt)	Mr(calc)	ppm	Miss	Score	Expect	Rank	Unique	Peptide
	2704	742.3818	1482.7490	1481.7514	673	0	18	0.016	1	U	R.NEGVATYAAAVLFR.M
146.	F7CJ82 Mass: 34383 Score: 16 Matches: 2(2) Sequences: 2(2) emPAI: 0.20
	Arginase OS=Equus caballus OX=9796 GN=ARG1 PE=3 SV=1
	Query	Observed	Mr(expt)	Mr(calc)	ppm	Miss	Score	Expect	Rank	Unique	Peptide
	1311	557.2972	1112.5799	1112.5826	-2.40	0	15	0.032	1	U	R.GGVEEGPTVLR.K
	1929	643.3221	1284.6296	1284.6350	-4.20	0	14	0.036	1	U	R.DVDPGEHYILK.T
147.	F7D7I2 Mass: 46034 Score: 15 Matches: 1(1) Sequences: 1(1) emPAI: 0.07
	Serpin family B member 12 OS=Equus caballus OX=9796 GN=SERPINB12 PE=3 SV=1
	Query	Observed	Mr(expt)	Mr(calc)	ppm	Miss	Score	Expect	Rank	Unique	Peptide
	1254	549.7940	1097.5735	1097.5869	-12.29	0	15	0.033	1	U	K.TQTILFYGR.V
148.	F6PSQ2 Mass: 40072 Score: 15 Matches: 1(1) Sequences: 1(1) emPAI: 0.08
	Uncharacterized protein OS=Equus caballus OX=9796 PE=3 SV=1
	Query	Observed	Mr(expt)	Mr(calc)	ppm	Miss	Score	Expect	Rank	Unique	Peptide
	2509	714.3650	1426.7154	1426.7205	-3.54	0	15	0.035	1	U	K.WAAVVVPSGEEQR.Y
	Proteins matching the same set of peptides:
	F6R4X4 Mass: 40710 Score: 15 Matches: 1(1) Sequences: 1(1)
	Uncharacterized protein OS=Equus caballus OX=9796 GN=LOC100057920 PE=3 SV=1
	F6R545 Mass: 38588 Score: 15 Matches: 1(1) Sequences: 1(1)
	Uncharacterized protein OS=Equus caballus OX=9796 GN=LOC100057920 PE=3 SV=1
	F6RHP4 Mass: 39943 Score: 15 Matches: 1(1) Sequences: 1(1)
	Uncharacterized protein OS=Equus caballus OX=9796 PE=3 SV=1
	F6RPN5 Mass: 41367 Score: 15 Matches: 1(1) Sequences: 1(1)
	Uncharacterized protein OS=Equus caballus OX=9796 GN=LOC100050706 PE=3 SV=1
	F6W143 Mass: 27512 Score: 15 Matches: 1(1) Sequences: 1(1)
	Uncharacterized protein OS=Equus caballus OX=9796 PE=3 SV=1
	F6WCX4 Mass: 40338 Score: 15 Matches: 1(1) Sequences: 1(1)
	Uncharacterized protein OS=Equus caballus OX=9796 GN=EQMHCC1 PE=3 SV=1
	F6XA91 Mass: 30945 Score: 15 Matches: 1(1) Sequences: 1(1)
	Uncharacterized protein OS=Equus caballus OX=9796 PE=3 SV=1
	F6XUA3 Mass: 29348 Score: 15 Matches: 1(1) Sequences: 1(1)
	Uncharacterized protein OS=Equus caballus OX=9796 PE=3 SV=1
	F6XUF3 Mass: 39345 Score: 15 Matches: 1(1) Sequences: 1(1)
	Uncharacterized protein OS=Equus caballus OX=9796 PE=3 SV=1
	F6XUK2 Mass: 39708 Score: 15 Matches: 1(1) Sequences: 1(1)
	Uncharacterized protein OS=Equus caballus OX=9796 PE=3 SV=1
	F6YLT0 Mass: 40541 Score: 15 Matches: 1(1) Sequences: 1(1)
	Uncharacterized protein OS=Equus caballus OX=9796 GN=EQMHCB2 PE=3 SV=1
	F7A7F4 Mass: 40289 Score: 15 Matches: 1(1) Sequences: 1(1)
	Uncharacterized protein OS=Equus caballus OX=9796 GN=MHCB3 PE=3 SV=1
	F7AH72 Mass: 39747 Score: 15 Matches: 1(1) Sequences: 1(1)
	Uncharacterized protein OS=Equus caballus OX=9796 GN=LOC100050473 PE=3 SV=1
	F7AKC4 Mass: 40414 Score: 15 Matches: 1(1) Sequences: 1(1)
	Uncharacterized protein OS=Equus caballus OX=9796 GN=LOC100056062 PE=3 SV=1
	F7BJB5 Mass: 40523 Score: 15 Matches: 1(1) Sequences: 1(1)
	Uncharacterized protein OS=Equus caballus OX=9796 PE=3 SV=1
	F7BSX5 Mass: 42854 Score: 15 Matches: 1(1) Sequences: 1(1)
	Uncharacterized protein OS=Equus caballus OX=9796 PE=3 SV=1
	F7C2F9 Mass: 30679 Score: 15 Matches: 1(1) Sequences: 1(1)
	Uncharacterized protein OS=Equus caballus OX=9796 PE=3 SV=1
	F7CG96 Mass: 34991 Score: 15 Matches: 1(1) Sequences: 1(1)
	Uncharacterized protein OS=Equus caballus OX=9796 PE=3 SV=1
	F7CUU6 Mass: 16407 Score: 15 Matches: 1(1) Sequences: 1(1)
	Uncharacterized protein OS=Equus caballus OX=9796 GN=LOC100051657 PE=4 SV=1
	F7DB76 Mass: 38883 Score: 15 Matches: 1(1) Sequences: 1(1)
	Uncharacterized protein OS=Equus caballus OX=9796 PE=3 SV=1
	F7DXG2 Mass: 40388 Score: 15 Matches: 1(1) Sequences: 1(1)
	Uncharacterized protein OS=Equus caballus OX=9796 GN=EQMCE1 PE=3 SV=1
	F7E2N0 Mass: 35772 Score: 15 Matches: 1(1) Sequences: 1(1)
	Uncharacterized protein OS=Equus caballus OX=9796 PE=3 SV=1
	H9GZU6 Mass: 17471 Score: 15 Matches: 1(1) Sequences: 1(1)
	Uncharacterized protein OS=Equus caballus OX=9796 PE=4 SV=1
	Q30486 Mass: 38789 Score: 15 Matches: 1(1) Sequences: 1(1)
	MHC Class I heavy chain OS=Equus caballus OX=9796 GN=EQMHCC1 PE=2 SV=1
149.	F7E486 Mass: 45198 Score: 14 Matches: 1(1) Sequences: 1(1) emPAI: 0.07
	5-azacytidine induced 2 OS=Equus caballus OX=9796 GN=AZI2 PE=4 SV=1
	Query	Observed	Mr(expt)	Mr(calc)	ppm	Miss	Score	Expect	Rank	Unique	Peptide
	2633	734.3681	1466.7217	1466.7551	-22.81	0	14	0.036	1	U	K.IHGLEQELELMR.K
150.	A0A0B4J1C5 Mass: 14719 Score: 14 Matches: 3(1) Sequences: 2(1) emPAI: 0.23
	Uncharacterized protein OS=Equus caballus OX=9796 GN=UBA52 PE=4 SV=1
	Query	Observed	Mr(expt)	Mr(calc)	ppm	Miss	Score	Expect	Rank	Unique	Peptide
	1163	534.3082	1066.6019	1066.6135	-10.85	0	11	0.074	1	U	K.ESTLHLVLR.L
	3570	894.4639	1786.9133	1786.9200	-3.75	0	14	0.042	1	U	K.TITLEVEPSDTIENVK.A 3571
	Proteins matching the same set of peptides:
	F6V625 Mass: 8659 Score: 14 Matches: 3(1) Sequences: 2(1)
	Uncharacterized protein OS=Equus caballus OX=9796 PE=4 SV=1
	F6YM88 Mass: 25746 Score: 14 Matches: 3(1) Sequences: 2(1)
	Ubiquitin B OS=Equus caballus OX=9796 GN=UBB PE=4 SV=1
	F7AUY9 Mass: 19539 Score: 14 Matches: 3(1) Sequences: 2(1)
	Ribosomal protein S27a OS=Equus caballus OX=9796 GN=RPS27A PE=4 SV=1
[truncated: 7 more rows]

## Sheet: Untreated sample
Mascot Search Results
[truncated: 3,822 more rows]
